# Supplementary material for: [3 + 2] cycloaddition for the assembly of indolizine-based heterocyclic sulfonyl fluorides
Source: Royal Society of Chemistry journal article supplement (doi:10.1039/d2qo01466a), 2022-11-22
Supplement: d2qo01466a1.pdf [file d2qo01466a1.pdf]

## Supporting Information

### **[3+2] cycloaddition for the assembly of indolizine- based heterocyclic sulfonyl fluorides**

Huan Xiong, Jianping Wu\*, and Hua-Li Qin\*

School of Chemistry, Chemical Engineering and Life Sciences; and State Key Laboratory of Advanced Technology for Materials Synthesis and Processing, Wuhan University of Technology, 205 Luoshi Road, Wuhan, 430070, P. R. China.

\*Corresponding author: Jianping Wu, Hua-Li Qin

*E-mail:* biojpwu@whut.edu.cn, qinhuali@whut.edu.cn

## Table of Contents

|                                                                                                |      |
|------------------------------------------------------------------------------------------------|------|
| 1. General Information.....                                                                    | S1   |
| 2. Optimization of the Reaction Conditions .....                                               | S2   |
| 3. General Procedures .....                                                                    | S10  |
| 3.1 General procedures for synthesis of the salts <b>1</b> (with <b>1a</b> as an example)..... | S10  |
| 3.2 General procedures for synthesis of the salts <b>4</b> (with <b>4a</b> as an example)..... | S11  |
| 3.3 General procedures for synthesis of 1-bromoethene-1-sulfonyl fluoride <b>2</b> .....       | S12  |
| 3.4 General procedure for synthesis of compounds <b>3</b> (with <b>3a</b> as an example).....  | S12  |
| 3.5 General procedure for synthesis of compounds <b>5</b> (with <b>5a</b> as an example).....  | S13  |
| 3.6 General procedure for synthesis of compound <b>6</b> .....                                 | S14  |
| 3.7 General procedure for synthesis of compound <b>7</b> .....                                 | S14  |
| 3.8 General procedure for synthesis of compound <b>8</b> .....                                 | S15  |
| 3.9 General procedure for synthesis of compound <b>9</b> .....                                 | S15  |
| 3.10 General procedure for synthesis of compound <b>10</b> .....                               | S16  |
| 3.11 General procedure for synthesis of compound <b>11</b> .....                               | S17  |
| 4. Characterization .....                                                                      | S18  |
| 5. References.....                                                                             | S51  |
| 6. NMR Spectra .....                                                                           | S53  |
| 7. Data of Crystal Structure of <b>5g</b> .....                                                | S204 |

## 1. General Information

All reactions were carried out under an air atmosphere unless otherwise specified. Oil bath was used for the heating reactions. NMR spectra were recorded in CDCl<sub>3</sub>, CD<sub>2</sub>Cl<sub>2</sub>, D<sub>2</sub>O or DMSO-*d*<sub>6</sub> on a 500 MHz (for <sup>1</sup>H), 471 MHz (for <sup>19</sup>F), and 126 MHz (for <sup>13</sup>C) Bruker Avance spectrometer, and were internally referenced to solvent residual signals (note: CDCl<sub>3</sub>:  $\delta$  H = 7.264 ppm,  $\delta$  C = 77.160 ppm; CD<sub>2</sub>Cl<sub>2</sub>:  $\delta$  H = 5.320 ppm,  $\delta$  C = 53.840 ppm; D<sub>2</sub>O:  $\delta$  H = 4.790 ppm; DMSO-*d*<sub>6</sub>:  $\delta$  H = 2.500 ppm,  $\delta$  C = 39.520 ppm). The following abbreviations were used to explain the multiplicities: s = singlet, d = doublet, t = triplet, q = quartet, dd = doublet of doublet, m = multiplet. The coupling constants were reported in Hertz (Hz). The HPLC experiments were carried out on a Waters e2695 instrument (column: J&K, RP-C18, 5  $\mu$ m, 4.6  $\times$  150 mm), and the HPLC yields of the products were determined by using the corresponding pure compounds as the external standards. Melting points were measured and uncorrected. HRMS experiments were performed on a TOF-Q ESI instrument. Reagents used in the reactions were all purchased from commercial sources and used without further purification. The product spots on the thin layer chromatography (TLC) were visualized under ultraviolet light (254 nm or 365 nm) followed by staining with potassium permanganate or phosphomolybdic acid.

## 2. Optimization of the Reaction Conditions

Table S1 Screening of the oxidant<sup>a</sup>

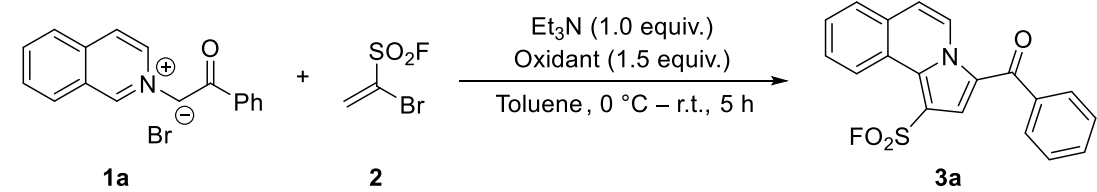

**1a** + **2**  $\xrightarrow[\text{Toluene, 0 } ^\circ\text{C} - \text{r.t., 5 h}]{\text{Et}_3\text{N (1.0 equiv.) Oxidant (1.5 equiv.)}}$  **3a**

| Entry | Oxidant (1.5 equiv.) | Yield (3a, %) <sup>b</sup> |
|-------|----------------------|----------------------------|
| 1     | DDQ                  | 46                         |
| 2     | TEMPO                | 20                         |
| 3     | BQ                   | 10                         |
| 4     | NFSI                 | 26                         |
| 5     | AgO                  | 40                         |
| 6     | AgNO <sub>3</sub>    | 19                         |
| 7     | CuO                  | 14                         |
| 8     | CuBr <sub>2</sub>    | 8                          |
| 9     | Cu(OAc) <sub>2</sub> | 33                         |
| 10    | MnO <sub>2</sub>     | 14                         |
| 11    | /                    | N.D.                       |

<sup>a</sup>Reaction conditions: **1a** (65 mg, 0.2 mmol, 1.0 equiv.), **2** (112 mg, 0.6 mmol, 3.0 equiv.), Et<sub>3</sub>N (20 mg, 0.2 mmol, 1.0 equiv.), oxidant (0.3 mmol, 1.5 equiv.) and toluene (0.1 M, 2.0 mL) were added to an oven-dried reaction tube (10 mL). After the addition was over, the resulting mixture was stirred at room temperature for 5 h. <sup>b</sup>HPLC yield ( $t_R = 5.912$  min,  $\lambda_{\text{max}} = 261.8$  nm; MeCN / H<sub>2</sub>O = 80 : 20 (v / v)). N.D. = Not detectable.

**Table S2** Screening of the base<sup>a</sup>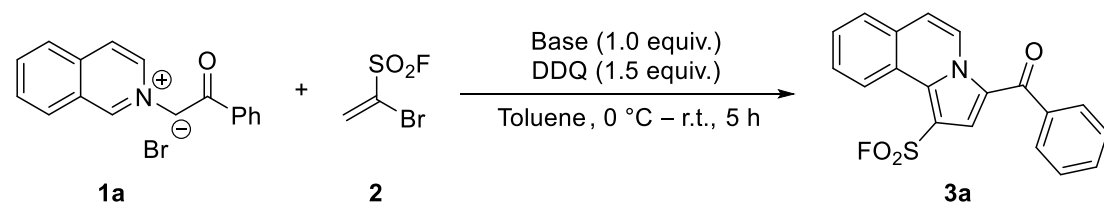

| Entry | Base (1.0 equiv.)               | Yield ( <b>3a</b> , %) <sup>b</sup> |
|-------|---------------------------------|-------------------------------------|
| 1     | Et <sub>3</sub> N               | 45                                  |
| 2     | DABCO                           | 28                                  |
| 3     | DIPEA                           | 42                                  |
| 4     | TMEDA                           | 40                                  |
| 5     | DBU                             | 14                                  |
| 6     | Tripropylamine                  | 24                                  |
| 7     | Na <sub>2</sub> CO <sub>3</sub> | N.D.                                |
| 8     | NaHCO <sub>3</sub>              | N.D.                                |
| 9     | K <sub>2</sub> CO <sub>3</sub>  | N.D.                                |
| 10    | KHCO <sub>3</sub>               | N.D.                                |
| 11    | CsCO <sub>3</sub>               | 6                                   |
| 12    | KH <sub>2</sub> PO <sub>4</sub> | N.D.                                |
| 13    | /                               | N.D.                                |

<sup>a</sup>Reaction conditions: **1a** (65 mg, 0.2 mmol, 1.0 equiv.), **2** (112 mg, 0.6 mmol, 3.0 equiv.), base (0.2 mmol, 1.0 equiv.), DDQ (68 mg, 0.3 mmol, 1.5 equiv.) and toluene (0.1M, 2.0 mL) were added to an oven-dried reaction tube (10 mL) at 0 °C. After the addition was over, the resulting mixture was stirred at room temperature for 5 h. <sup>b</sup>HPLC yield ( $t_R = 5.912$  min,  $\lambda_{max} = 261.8$  nm; MeCN / H<sub>2</sub>O = 80 : 20 (v / v)). N.D. = Not detectable.

**Table S3** Screening of the Et<sub>3</sub>N loading<sup>a</sup>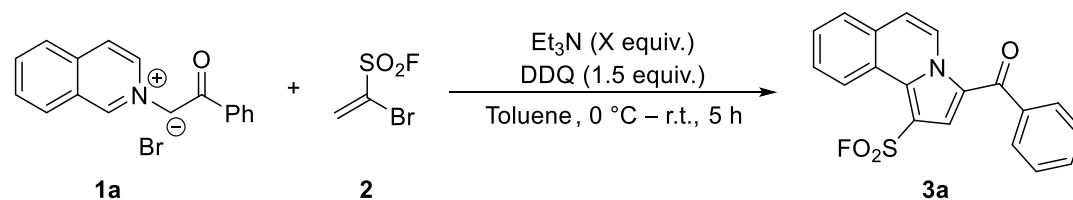

| Entry | Et <sub>3</sub> N (X equiv.) | Yield ( <b>3a</b> , %) <sup>b</sup> |
|-------|------------------------------|-------------------------------------|
| 1     | 1.0                          | 45                                  |
| 2     | <b>1.5</b>                   | <b>50</b>                           |
| 3     | 2.0                          | 51                                  |
| 4     | 2.5                          | 49                                  |
| 5     | 3.0                          | 32                                  |

<sup>a</sup>Reaction conditions: **1a** (65 mg, 0.2 mmol, 1.0 equiv.), **2** (112 mg, 0.6 mmol, 3.0 equiv.), Et<sub>3</sub>N (X equiv.), DDQ (68 mg, 0.3 mmol, 1.5 equiv.) and toluene (0.1 M, 2.0 mL) were added to an oven-dried reaction tube (10 mL) at 0 °C. After the addition was over, the resulting mixture was stirred at room temperature for 5 h. <sup>b</sup>HPLC yield ( $t_R = 5.912$  min,  $\lambda_{max} = 261.8$  nm; MeCN / H<sub>2</sub>O = 80 : 20 (v / v)).

**Table S4** Screening of the DDQ loading<sup>a</sup>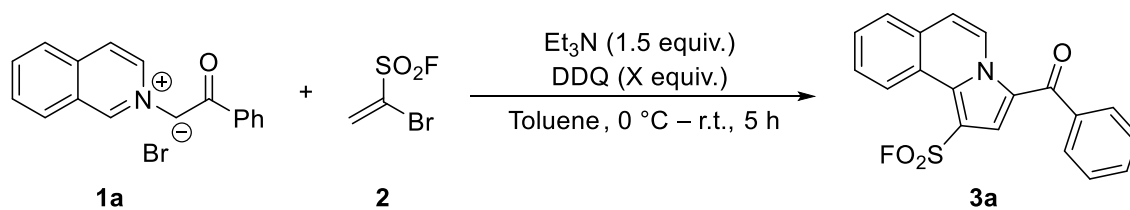

| Entry    | DDQ (X equiv.) | Yield ( <b>3a</b> , %) <sup>b</sup> |
|----------|----------------|-------------------------------------|
| 1        | 0.5            | 29                                  |
| 2        | 1.0            | 43                                  |
| 3        | 1.5            | 49                                  |
| <b>4</b> | <b>2.0</b>     | <b>56</b>                           |
| 5        | 3.0            | 50                                  |

<sup>a</sup>Reaction conditions: **1a** (65 mg, 0.2 mmol, 1.0 equiv.), **2** (112 mg, 0.6 mmol, 3.0 equiv.),  $\text{Et}_3\text{N}$  (30 mg, 0.3 mmol, 1.5 equiv.), DDQ (X equiv.) and toluene (0.1 M, 2.0 mL) were added to an oven-dried reaction tube (10 mL) at  $0\text{ }^\circ\text{C}$ . After the addition was over, the resulting mixture was stirred at room temperature for 5 h. <sup>b</sup>HPLC yield ( $t_{\text{R}} = 5.912\text{ min}$ ,  $\lambda_{\text{max}} = 261.8\text{ nm}$ ; MeCN /  $\text{H}_2\text{O} = 80 : 20$  (v / v)).

**Table S5** Screening of the BESF (**2**) loading<sup>a</sup>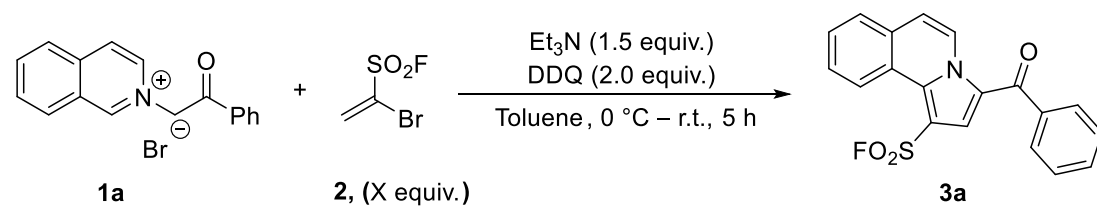

| Entry    | BESF ( <b>2</b> , X equiv.) | Yield ( <b>3a</b> , %) <sup>b</sup> |
|----------|-----------------------------|-------------------------------------|
| 1        | 1.0                         | 43                                  |
| 2        | 1.5                         | 47                                  |
| 3        | 2.0                         | 50                                  |
| <b>4</b> | <b>2.5</b>                  | <b>55</b>                           |
| 5        | 3.0                         | 53                                  |
| 6        | 4.0                         | 57                                  |
| 7        | 5.0                         | 55                                  |
| 8        | 6.0                         | 56                                  |
| 9        | 8.0                         | 54                                  |
| 10       | 10.0                        | 49                                  |

<sup>a</sup>Reaction conditions: **1a** (65 mg, 0.2 mmol, 1.0 equiv.), **2** (X equiv.), Et<sub>3</sub>N (30 mg, 0.3 mmol, 1.5 equiv.), DDQ (91 mg, 0.4 mmol, 2.0 equiv.) and toluene (0.1 M, 2.0 mL) were added to an oven-dried reaction tube (10 mL) at 0 °C. After the addition was over, the resulting mixture was stirred at room temperature for 5 h. <sup>b</sup>HPLC yield ( $t_R = 5.912$  min,  $\lambda_{max} = 261.8$  nm; MeCN / H<sub>2</sub>O = 80 : 20 (v / v)).



**Table S6** Screening of the solvent<sup>a</sup>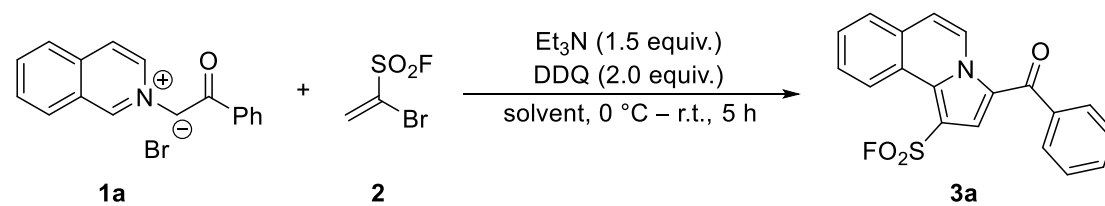

| Entry | Solvent                                | Yield ( <b>3a</b> , %) <sup>b</sup> |
|-------|----------------------------------------|-------------------------------------|
| 1     | DCM                                    | 46                                  |
| 2     | CHCl <sub>3</sub>                      | 61                                  |
| 3     | DCE                                    | 48                                  |
| 4     | Toluene                                | 55                                  |
| 5     | O-dichlorobenzene                      | 54                                  |
| 6     | Bromobenzene                           | 53                                  |
| 7     | Toluene/ CHCl <sub>3</sub> (v/v = 1:1) | 58                                  |
| 8     | Toluene/ CHCl <sub>3</sub> (v/v = 1:3) | 47                                  |
| 9     | Toluene/ CHCl <sub>3</sub> (v/v = 3:1) | 57                                  |

<sup>a</sup>Reaction conditions: **1a** (65 mg, 0.2 mmol, 1.0 equiv.), **2** (95 mg, 0.5 mmol, 2.5 equiv.), Et<sub>3</sub>N (30 mg, 0.3 mmol, 1.5 equiv.), DDQ (91 mg, 0.4 mmol, 2.0 equiv.) and solvent (0.1 M, 2.0 mL) were added to an oven-dried reaction tube (10 mL) at 0 °C. After the addition was over, the resulting mixture was stirred at room temperature for 5 h. <sup>b</sup>HPLC yield ( $t_R = 5.912$  min,  $\lambda_{max} = 261.8$  nm; MeCN / H<sub>2</sub>O = 80 : 20 (v / v)).

**Table S7** Screening of the temperature<sup>a</sup>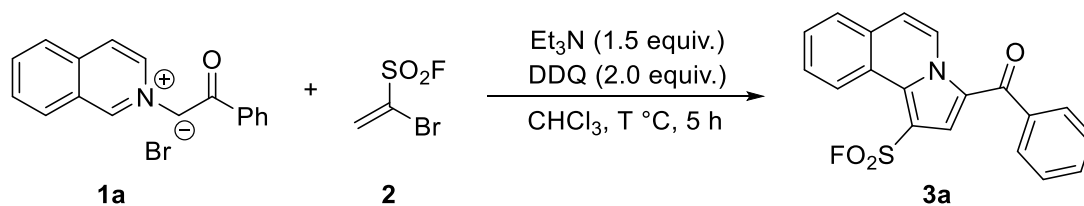

| Entry | Temperature (°C) | Yield ( <b>3a</b> , %) <sup>b</sup> |
|-------|------------------|-------------------------------------|
| 1     | 0                | 60                                  |
| 2     | 25               | 62                                  |
| 3     | 35               | 63                                  |
| 4     | 45               | 59                                  |
| 5     | 55               | 61                                  |
| 6     | 65               | 63                                  |

<sup>a</sup>Reaction conditions: **1a** (65 mg, 0.2 mmol, 1.0 equiv.), **2** (95 mg, 0.5 mmol, 2.5 equiv.), Et<sub>3</sub>N (30 mg, 0.3 mmol, 1.5 equiv.), DDQ (91 mg, 0.4 mmol, 2.0 equiv.) and CHCl<sub>3</sub> (0.1 M, 2.0 mL) were added to an oven-dried reaction tube (10 mL) at 0 °C. After the addition was over, the resulting mixture was stirred at the corresponding temperature for 5 h. <sup>b</sup>HPLC yield (t<sub>R</sub> = 5.912 min, λ<sub>max</sub> = 261.8 nm; MeCN / H<sub>2</sub>O = 80 : 20 (v / v)).

**Table S8** Screening of the time<sup>a</sup>

The reaction scheme shows the synthesis of compound **3a** from **1a** and **2**. **1a** is a quaternary pyridinium salt with a phenyl group and a bromide counterion. **2** is a bromoalkene with a sulfonate group. The reaction conditions are Et<sub>3</sub>N (1.5 equiv.), DDQ (2.0 equiv.), CHCl<sub>3</sub>, 0 °C – r.t., time (h). The product **3a** is a pyridine derivative with a sulfonate group and a phenyl group.

| Entry | Time (h) | Yield ( <b>3a</b> , %) <sup>b</sup> |
|-------|----------|-------------------------------------|
| 1     | 0.5      | 55                                  |
| 2     | 1.0      | 60                                  |
| 3     | 2.0      | 56                                  |
| 4     | 4.0      | 63                                  |
| 5     | 7.0      | 64                                  |
| 6     | 18.0     | 61                                  |

<sup>a</sup>Reaction conditions: **1a** (65 mg, 0.2 mmol, 1.0 equiv.), **2** (95 mg, 0.5 mmol, 2.5 equiv.), Et<sub>3</sub>N (30 mg, 0.3 mmol, 1.5 equiv.), DDQ (91 mg, 0.4 mmol, 2.0 equiv.) and CHCl<sub>3</sub> (0.1 M, 2.0 mL) were added to an oven-dried reaction tube (10 mL) at 0 °C. After the addition was over, the resulting mixture was stirred at room temperature for the corresponding time. <sup>b</sup>HPLC yield ( $t_R$  = 5.912 min,  $\lambda_{\max}$  = 261.8 nm; MeCN / H<sub>2</sub>O = 80 : 20 (v / v)).

### 3. General Procedures

#### 3.1 General procedures for synthesis of the salts **1** (with **1a** as an example)

Isoquinoline (5 mmol) was added to a solution of the 2-bromoacetophenone (1.1 equiv.) in acetone (0.4 M) in a 50 mL round-bottom flask equipped with a magnetic stirring bar. The mixture was stirred for 24 h at room temperature. Filter the resulting precipitate and wash the residue with diethyl ether. Finally, the residue was dried in vacuum to obtain the product **1a**.

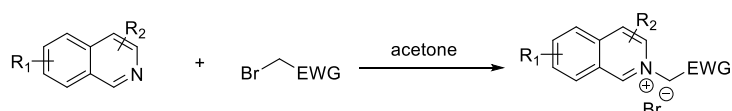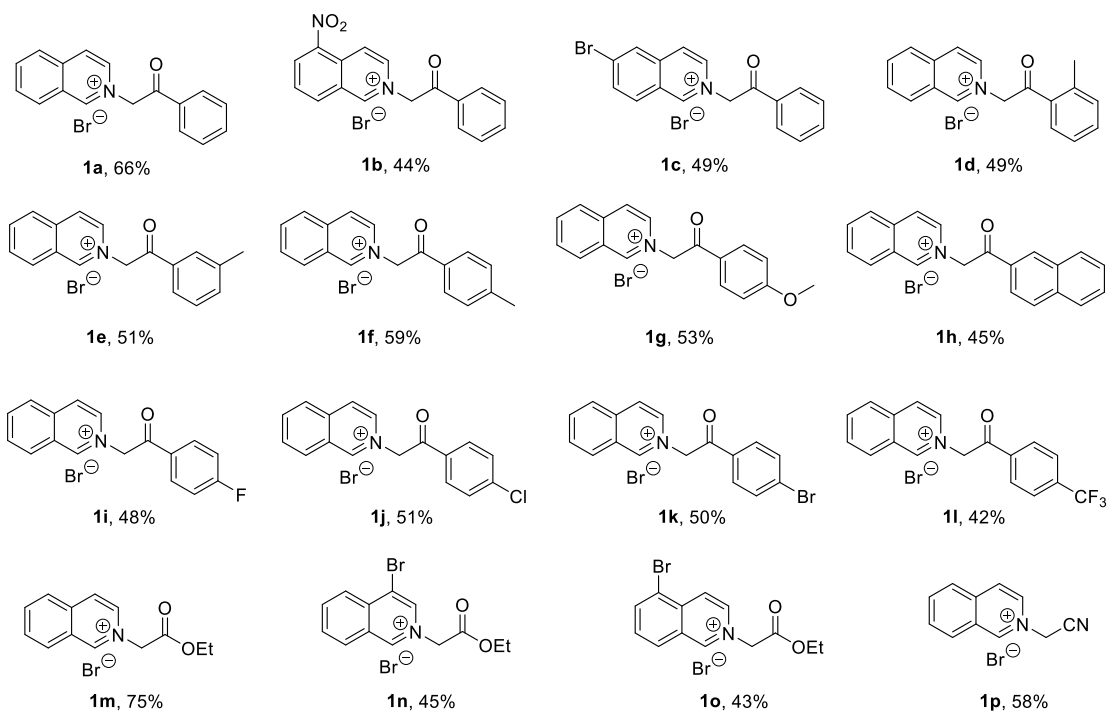

**Scheme S1. Preparation of the salts **1****

### 3.2 General procedures for synthesis of the salts **4** (with **4a** as an example)

Quinoline (5 mmol) was added to a solution of the 2-bromoacetophenone (1.1 equiv.) in EtOAc (0.4 M) in a 50 mL round-bottom flask equipped with a magnetic stirring bar. The mixture was refluxed for 12 h, then cooled to room temperature upon completion. Filter the resulting precipitate and wash the residue with diethyl ether. Finally, the residue was dried in vacuum to obtain the product **4a**.

Note: Switched EtOAc to acetone for preparing **4m** and **4p**, toluene for synthesis of **4o** and reacted at room temperature.

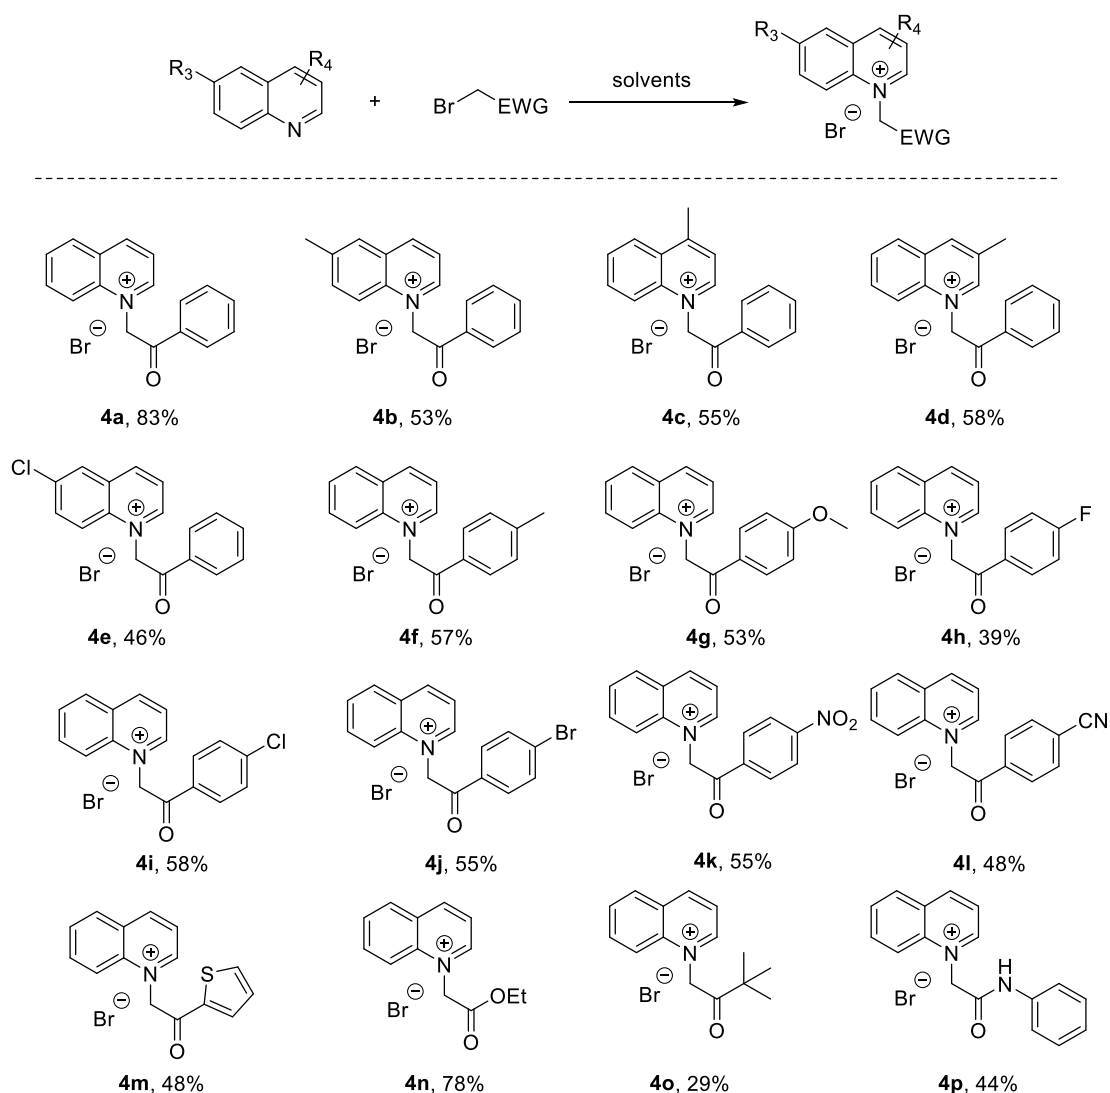

Scheme S2. Preparation of the salts **4**

### 3.3 General procedures for synthesis of 1-bromoethene-1-sulfonyl fluoride 2<sup>[1]</sup>

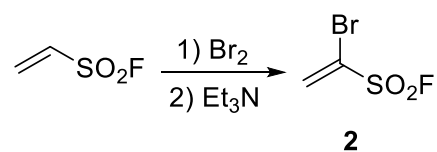

Ethenesulfonyl fluoride, 33 g (300 mmol) was dissolved in 300 mL CH<sub>2</sub>Cl<sub>2</sub> and placed in a 500 mL round-bottom flask equipped with a stirred bar under the irradiation of 50 W white light. To the flask was added 96 g (600 mmol, 31 mL) bromine in three portions in 30 minutes, the reaction was stirred for about 12-16 hours. After the ethenesulfonyl fluoride was completely consumed, the solution was washed with sodium thiosulfate solution until the color turned light yellow. Then dried over anhydrous Na<sub>2</sub>SO<sub>4</sub>, and concentrated to dryness. The residue was dissolved in 250 mL dry ether, and the mixture was cooled to -50 °C. A solution of 31 g (300 mmol) of triethylamine in 60 mL dry ether was added in 30 minutes below -40 °C. The mixture reacted vigorously to precipitate triethylamine hydrobromide. After warming slowly to room temperature with stirring, dilute sulfuric acid was added and the layers were separated. The layers were washed with acid, water and saturated sodium chloride solution, dried with anhydrous Na<sub>2</sub>SO<sub>4</sub>, concentrated to dryness. The residue was purified by reduced pressure distillation with a water pump at 85 °C. The product weighed 42.8 g, 76 %.

### 3.4 General procedure for synthesis of compounds 3 (with 3a as an example)

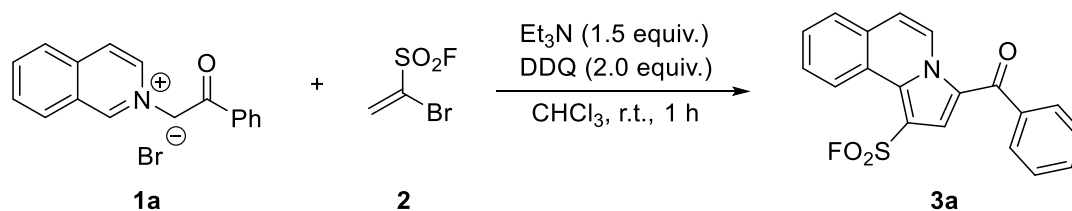

2-(2-oxo-2-phenylethyl)isoquinolin-2-ium bromide (**1a**, 328 mg, 1.0 mmol), BESF (**2**, 473 mg, 2.5 mmol) and CHCl<sub>3</sub> (0.2 M, 5.0 mL) were added to an oven-dried reaction tube (30 mL) equipped with a magnetic stirring bar. Et<sub>3</sub>N (152 mg, 1.5 mmol) was dropped into the suspension at 0 °C. Then DDQ (545 mg, 2.0 mmol) was added and the mixture was stirred at room temperature for 1 h. After the reaction was completed, the mixture was filtered, and the filter cake was washed with dichloromethane. The filtrate was extracted with dichloromethane (3×20 mL) and the combined organic layers were further washed with brine, and dried over anhydrous sodium sulfate. The solvent was

concentrated under reduced pressure and the residue was further purified by column chromatography on silica gel *via* gradient elution with petroleum ether/dichloromethane (3:1 to 1:1, v/v) as eluent to afford pure heterocyclic sulfonyl fluoride **3a** as yellow solid (212 mg, 60% yield).

### 3.5 General procedure for synthesis of compounds **5** (with **5a** as an example)

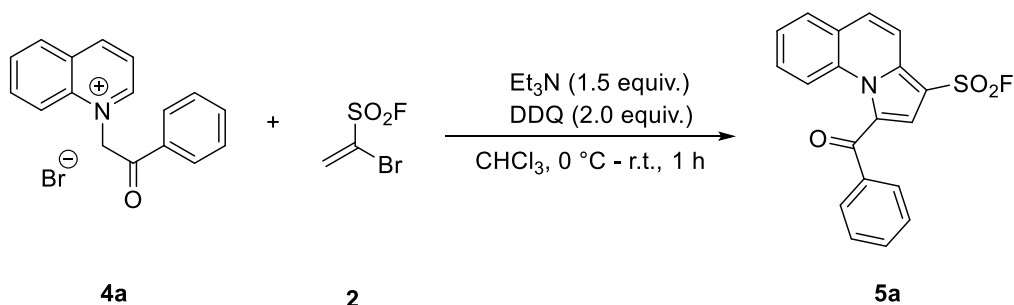

1-(2-oxo-2-phenylethyl)quinolin-1-ium bromide (**4a**, 328 mg, 1.0 mmol), BESF (**2**, 473 mg, 2.5 mmol) and CHCl<sub>3</sub> (0.2 M, 5.0 mL) were added to an oven-dried reaction tube (30 mL) equipped with a magnetic stirring bar. Et<sub>3</sub>N (152 mg, 1.5 mmol) was dropped into the suspension at 0 °C. Then DDQ (545 mg, 2.0 mmol) was added and the mixture was stirred at room temperature for 1 h. After the reaction was completed, the mixture was filtered, and the filter cake was washed with dichloromethane. The filtrate was extracted with dichloromethane (3×20 mL) and the combined organic layers were further washed with brine, and dried over anhydrous sodium sulfate. The solvent was concentrated under reduced pressure and the residue was further purified by column chromatography on silica gel *via* gradient elution with petroleum ether/dichloromethane (3:1 to 1:1, v/v) as eluent to afford pure heterocyclic sulfonyl fluoride **5a** as light white solid (296 mg, 84% yield).

### 3.6 General procedure for synthesis of compound 6

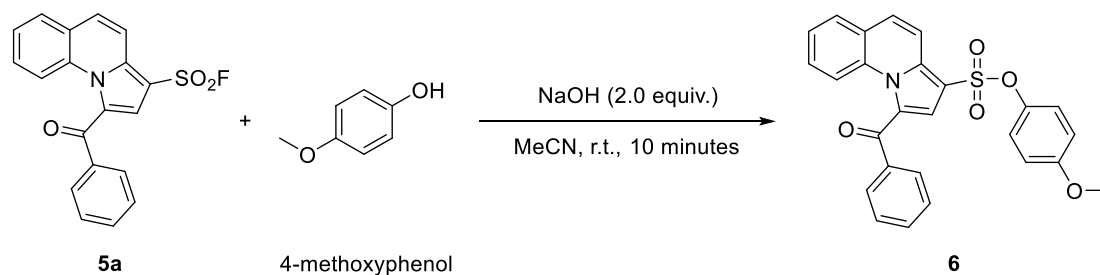

1-benzoylpyrrolo[1,2-a]quinoline-3-sulfonyl fluoride (**5a**, 177 mg, 0.5 mmol), 4-methoxyphenol (74.4 mg, 0.6 mmol), NaOH (40 mg, 1.0 mmol) were added in a solution of acetonitrile (3 mL) and reacted at room temperature for 10 minutes. The reaction mixture was extracted with ethyl acetate (3×20 mL) and the combined organic layers were dried over anhydrous sodium sulfate, filtered and concentrated under reduced pressure. The crude product was further purified by column chromatography on silica gel by gradient elution with petroleum ether/dichloromethane (3:1 to 0:1, v/v) as eluent to obtain pure compound **6** as yellow solid (226 mg, 99% yield).

### 3.7 General procedure for synthesis of compound 7

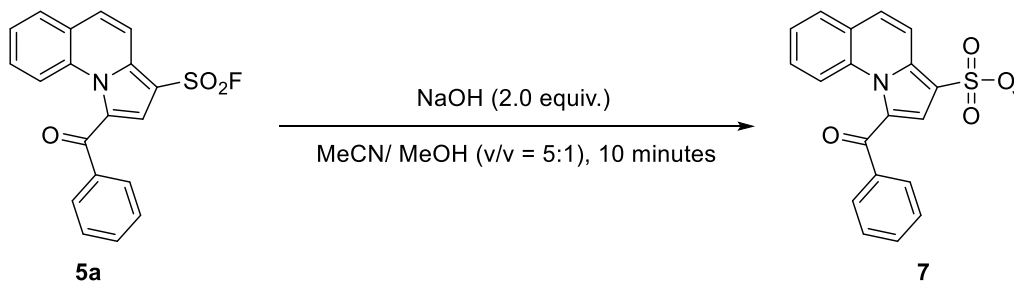

1-benzoylpyrrolo[1,2-a]quinoline-3-sulfonyl fluoride (**5a**, 177 mg, 0.5 mmol), and NaOH (40 mg, 1.0 mmol) were added in mixed solution (3 mL) of acetonitrile and methanol (5:1), and reacted at room temperature for 10 minutes. The reaction mixture was extracted with ethyl acetate (3×20 mL) and the combined organic layers was dried over anhydrous sodium sulfate, filtered and concentrated under reduced pressure. The crude product was further purified by column chromatography on silica gel by gradient elution with petroleum ether/ dichloromethane (3:1 to 0:1, v/v) as eluent to obtain pure compound **7** as yellow solid (170 mg, 93% yield).



### 3.8 General procedure for synthesis of compound 8

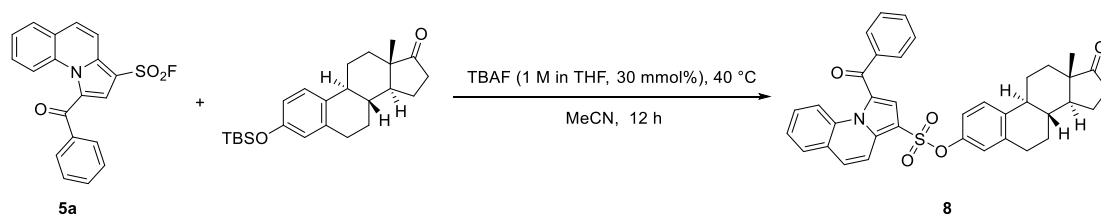

To a solution of compound **5a** (70 mg, 0.2 mmol) and TBS-protected estrone (77 mg, 0.2 mmol) dissolved in acetonitrile (2 mL) was added catalytic amount (30 mol%, 60  $\mu$ L) of TBAF solution (tetrabutylammonium fluoride, 1 M in anhydrous THF), and the resulting mixture was stirred at 40 °C for 12 h. The reaction mixture was diluted with water and the aqueous phase was extracted with dichloromethane (3 $\times$ 20 mL). The combined organic layers were washed with brine and dried over anhydrous Na<sub>2</sub>SO<sub>4</sub> before being concentrated to dryness under vacuum. The residue was purified through silica gel chromatography with petroleum ether/ dichloromethane (1:1, v/v) as eluent to obtain pure compound **8** as yellow solid (68 mg, 55% yield).

### 3.9 General procedure for synthesis compound of 9

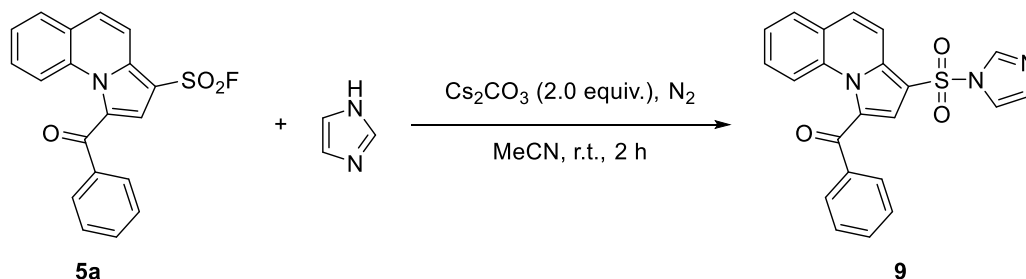

1-benzoylpyrrolo[1,2-a]quinoline-3-sulfonyl fluoride (**5a**, 177 mg, 0.5 mmol), imidazole (68 mg, 1.0 mmol) and Cs<sub>2</sub>CO<sub>3</sub> (326 mg, 1.0 mmol) were added in mixed solution (3 mL) of acetonitrile, and reacted at room temperature under N<sub>2</sub> for 2 h. The reaction mixture was extracted with dichloromethane (3 $\times$ 20 mL) and the combined organic layers was dried over anhydrous sodium sulfate, filtered and concentrated under reduced pressure. The crude product was further purified by column chromatography on silica gel by gradient elution with petroleum ether/ dichloromethane (1:1 to 0:1, v/v) as eluent to obtain pure compound **9** as white solid (184 mg, 92% yield).

### 3.10 General procedure for synthesis of compound **10**

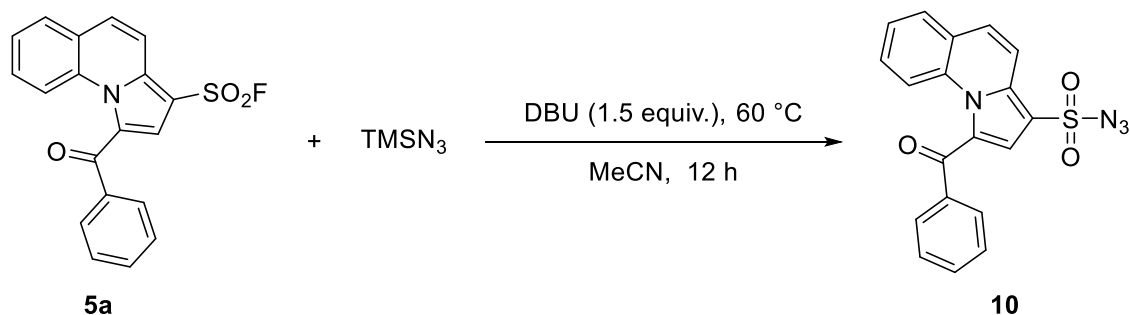

To a stirred solution of compound **5a** (177 mg, 0.5 mmol) in MeCN (3 mL) was added DBU (228 mg, 1.5 mmol) followed by  $\text{TMSN}_3$  (144 mg, 1.25 mmol). The resultant solution was stirred at  $60\text{ }^\circ\text{C}$  for 2 h, then a further portion of  $\text{TMSN}_3$  (86 mg, 0.75 mmol) was added and reacted for further 10 h. The reaction mixture was extracted with dichloromethane ( $3 \times 20\text{ mL}$ ) and the combined organic layers were dried over anhydrous sodium sulfate, filtered and concentrated under reduced pressure. The crude product was further purified by column chromatography on silica gel by gradient elution with petroleum ether/ dichloromethane (1:1, v/v) as eluent to obtain pure compound **10** as yellow solid (152 mg, 81% yield).

### 3.11 General procedure for synthesis of compound 11

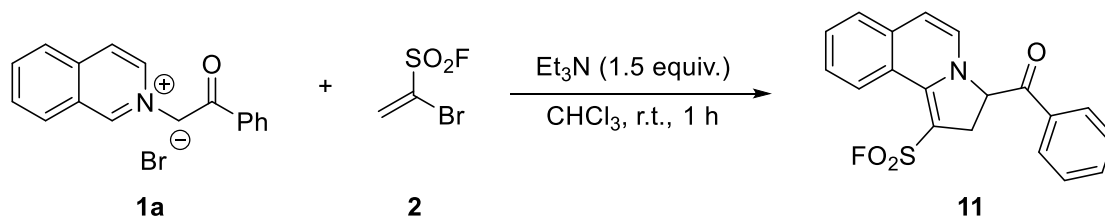

2-(2-oxo-2-phenylethyl)isoquinolin-2-ium bromide (**1a**, 656 mg, 1.0 mmol), BESF (**2**, 946 mg, 2.5 mmol) and  $\text{CHCl}_3$  (0.2 M, 10.0 mL) were added to an oven-dried reaction tube (30 mL) equipped with a magnetic stirring bar.  $\text{Et}_3\text{N}$  (304 mg, 1.5 mmol) was dropped into the suspension at 0 °C. The mixture was stirred at room temperature for 1 h. The mixture was extracted with dichloromethane (3×20 mL) and the combined organic layers were further washed with brine, and dried over anhydrous sodium sulfate. The solvent was concentrated under reduced pressure and the residue was further purified by column chromatography on silica gel *via* gradient elution with petroleum ether/ dichloromethane (1:1, v/v) as eluent to afford compound **11** as yellow solid (121 mg, 17% yield).

#### 4. Characterization

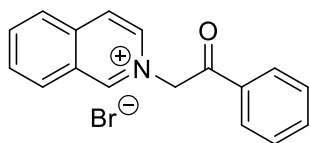

**1a**

*2-(2-oxo-2-phenylethyl)isoquinolin-2-ium bromide (1a)*. White solid, 1079 mg, 66% yield. M.p. 208–210 °C. General procedures for synthesis of the salts **1** was followed. The NMR data is identical to that reported in literature<sup>[2]</sup>. <sup>1</sup>H NMR (500 MHz, DMSO-*d*<sub>6</sub>)  $\delta$  10.14 (s, 1H), 8.81 (dd,  $J_1 = 1.5$  Hz,  $J_2 = 7.0$  Hz, 1H), 8.71 (d,  $J = 6.5$  Hz, 1H), 8.54 (d,  $J = 8.0$  Hz, 1H), 8.43 (d,  $J = 8.0$  Hz, 1H), 8.34 – 8.30 (m, 1H), 8.13 – 8.09 (m, 3H), 7.82 – 7.79 (m, 1H), 7.69 – 7.66 (m, 2H), 6.75 (s, 2H).

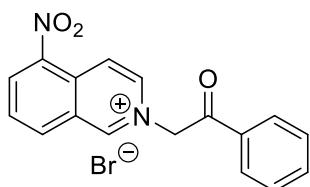

**1b**

*5-nitro-2-(2-oxo-2-phenylethyl)isoquinolin-2-ium bromide (1b)*. Yellow solid, 820 mg, 44% yield. M.p. 192–194 °C. General procedures for synthesis of the salts **1** was followed. <sup>1</sup>H NMR (500 MHz, DMSO-*d*<sub>6</sub>)  $\delta$  10.44 (s, 1H), 9.12 – 8.97 (m, 4H), 8.31 (s, 1H), 8.13 (s, 2H), 7.81 – 7.69 (m, 3H), 6.83 (s, 2H). <sup>13</sup>C NMR (126 MHz, DMSO-*d*<sub>6</sub>)  $\delta$  190.5, 152.7, 144.1, 139.0, 137.7, 134.8, 134.7, 133.4, 130.8, 129.5, 129.1, 128.3, 127.6, 121.3, 66.3. HRMS-ESI (m/z) calcd. for [C<sub>17</sub>H<sub>13</sub>N<sub>2</sub>O<sub>3</sub>]<sup>+</sup> ([M-Br]<sup>+</sup>): 293.0921, found: 293.0925.

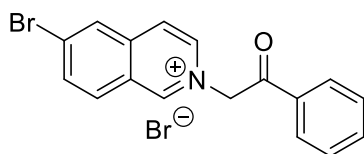

**1c**

*6-bromo-2-(2-oxo-2-phenylethyl)isoquinolin-2-ium bromide (1c)*. White solid, 997 mg, 49% yield. M.p. 235–237 °C. General procedures for synthesis of the salts **1** was followed. <sup>1</sup>H NMR (500 MHz, DMSO-*d*<sub>6</sub>)  $\delta$  10.14 (s, 1H), 8.84 (dd,  $J_1 = 1.5$  Hz,  $J_2 =$

7.0 Hz, 1H), 8.78 (d,  $J = 1.5$  Hz, 1H), 8.64 (d,  $J = 7.0$  Hz, 1H), 8.50 (d,  $J = 9.0$  Hz, 1H), 8.25 (dd,  $J_1 = 2.0$  Hz,  $J_2 = 9.0$  Hz, 1H), 8.13 – 8.11 (m, 2H), 7.82 – 7.79 (m, 1H), 7.69 – 7.66 (m, 2H), 6.72 (s, 2H).  $^{13}\text{C NMR}$  (126 MHz, DMSO- $d_6$ )  $\delta$  190.7, 151.8, 138.0, 137.4, 134.7, 134.6, 133.5, 132.3, 132.2, 129.7, 129.1, 128.3, 125.5, 124.4, 66.2. **HRMS-ESI** (m/z) calcd. for  $[\text{C}_{17}\text{H}_{13}\text{BrNO}]^+$  ( $[\text{M}-\text{Br}]^+$ ): 326.0175, found: 326.0168.

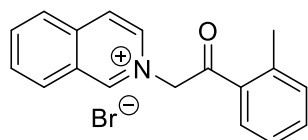

**1d**

2-(2-oxo-2-(*o*-tolyl)ethyl)isoquinolin-2-ium bromide (**1d**). White solid, 838 mg, 49% yield. M.p. 229–230 °C. General procedures for synthesis of the salts **1** was followed.  $^1\text{H NMR}$  (500 MHz, DMSO- $d_6$ )  $\delta$  10.17 (s, 1H), 8.83 (dd,  $J_1 = 1.5$  Hz,  $J_2 = 7.0$  Hz, 1H), 8.71 (d,  $J = 7.0$  Hz, 1H), 8.55 (d,  $J = 8.5$  Hz, 1H), 8.43 (d,  $J = 8.5$  Hz, 1H), 8.32 (t,  $J = 8.0$  Hz, 1H), 8.17 (d,  $J = 7.5$  Hz, 1H), 8.11 (t,  $J = 8.0$  Hz, 1H), 7.62 (t,  $J = 7.0$  Hz, 1H), 7.51 (t,  $J = 7.5$  Hz, 1H), 7.43 (d,  $J = 8.0$  Hz, 1H), 6.6 (s, 2H), 2.5 (s, 3H).  $^{13}\text{C NMR}$  (126 MHz, DMSO- $d_6$ )  $\delta$  193.0, 151.6, 139.1, 137.3, 137.1, 136.3, 133.2, 133.1, 132.2, 131.3, 130.5, 129.7, 127.3, 126.8, 126.2, 125.3, 67.2, 21.1. **HRMS-ESI** (m/z) calcd. for  $[\text{C}_{18}\text{H}_{16}\text{NO}]^+$  ( $[\text{M}-\text{Br}]^+$ ): 262.1226, found: 262.1235.

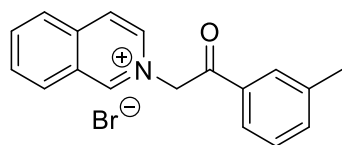

**1e**

2-(2-oxo-2-(*m*-tolyl)ethyl)isoquinolin-2-ium bromide (**1e**). White solid, 872 mg, 51% yield. M.p. 262–263 °C. General procedures for synthesis of the salts **1** was followed.  $^1\text{H NMR}$  (500 MHz, DMSO- $d_6$ )  $\delta$  10.06 (s, 1H), 8.76 (dd,  $J_1 = 1.0$  Hz,  $J_2 = 6.5$  Hz, 1H), 8.70 (d,  $J = 6.5$  Hz, 1H), 8.55 (d,  $J = 8.5$  Hz, 1H), 8.43 (d,  $J = 8.5$  Hz, 1H), 8.33 (t,  $J = 7.5$  Hz, 1H), 8.12 (t,  $J = 7.5$  Hz, 1H), 7.94 – 7.91 (m, 2H), 7.63 (d,  $J = 7.5$  Hz, 1H), 7.57 (t,  $J = 7.5$  Hz, 1H), 6.65 (s, 2H), 2.45 (s, 3H).  $^{13}\text{C NMR}$  (126 MHz, DMSO- $d_6$ )  $\delta$  190.9, 151.6, 138.6, 137.4, 137.2, 136.3, 135.3, 133.6, 131.4, 130.6, 129.0, 128.5,

127.4, 126.8, 125.5, 125.4, 66.1, 20.8. **HRMS-ESI** (m/z) calcd. for [C<sub>18</sub>H<sub>16</sub>NO]<sup>+</sup> ([M-Br]<sup>+</sup>): 262.1226, found: 262.1220.

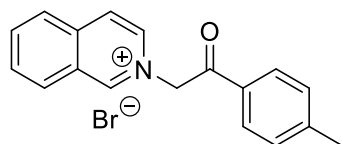

**1f**

*2-(2-(2-oxo-2-(p-tolyl)ethyl)isoquinolin-2-ium bromide (1f)*. White solid, 1009 mg, 59% yield. M.p. 217–219 °C. General procedures for synthesis of the salts **1** was followed. The compound was reported in literature.<sup>[3]</sup> **<sup>1</sup>H NMR** (500 MHz, DMSO-*d*<sub>6</sub>) δ 10.12 (d, *J* = 4.5 Hz, 1H), 8.80 – 8.78 (m, 1H), 8.70 (d, *J* = 7.0 Hz, 1H), 8.54 (d, *J* = 8.5 Hz, 1H), 8.42 (d, *J* = 8.0 Hz, 1H), 8.34 – 8.31 (m, 1H), 8.12 – 8.10 (m, 1H), 8.03 – 8.01 (m, 2H), 7.48 (d, *J* = 7.5 Hz, 2H), 6.69 (d, *J* = 5.0 Hz, 2H), 2.44 (s, 3H).

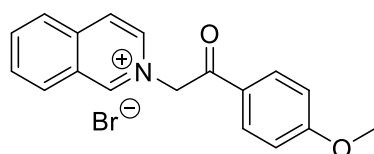

**1g**

*2-(2-(4-methoxyphenyl)-2-oxoethyl)isoquinolin-2-ium bromide (1g)*. White solid, 949 mg, 53% yield. M.p. 213–215 °C. General procedures for synthesis of the salts **1** was followed. The compound was reported in literature.<sup>[3]</sup> **<sup>1</sup>H NMR** (500 MHz, DMSO-*d*<sub>6</sub>) δ 10.12 (s, 1H), 8.79 (dd, *J*<sub>1</sub> = 1.0 Hz, *J*<sub>2</sub> = 6.5 Hz, 1H), 8.69 (d, *J* = 7.0 Hz, 1H), 8.54 (d, *J* = 8.0 Hz, 1H), 8.42 (d, *J* = 8.5 Hz, 1H), 8.33 – 8.30 (m, 1H), 8.12 – 8.08 (m, 3H), 7.21 – 7.18 (m, 2H), 6.67 (s, 2H), 3.90 (s, 3H).

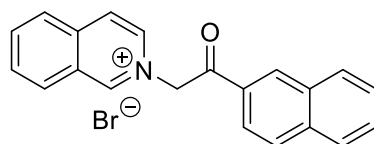

**1h**

*2-(2-(naphthalen-2-yl)-2-oxoethyl)isoquinolin-2-ium bromide (1h)*. White solid, 850 mg, 45% yield. M.p. 259–261 °C. General procedures for synthesis of the salts **1** was

followed.  $^1\text{H NMR}$  (500 MHz,  $\text{DMSO-}d_6$ )  $\delta$  10.14 (s, 1H), 8.93 (s, 1H), 8.83 (dd,  $J_1 = 1.5$  Hz,  $J_2 = 6.5$  Hz, 1H), 8.72 (d,  $J = 6.5$  Hz, 1H), 8.57 (d,  $J = 8.0$  Hz, 1H), 8.44 (d,  $J = 8.0$  Hz, 1H), 8.36 – 8.32 (m, 1H), 8.25 (d,  $J = 8.0$  Hz, 1H), 8.18 – 8.07 (m, 4H), 7.78 – 7.70 (m, 2H), 6.83 (s, 2H).  $^{13}\text{C NMR}$  (126 MHz,  $\text{DMSO-}d_6$ )  $\delta$  190.8, 151.7, 137.4, 137.2, 136.3, 135.6, 132.0, 131.3, 130.9, 130.7, 130.6, 129.7, 129.4, 128.8, 127.8, 127.4, 127.4, 126.8, 125.4, 123.2, 66.1. **HRMS-ESI** ( $m/z$ ) calcd. for  $[\text{C}_{21}\text{H}_{16}\text{NO}]^+$  ( $[\text{M-Br}]^+$ ): 298.1226, found: 298.1222.

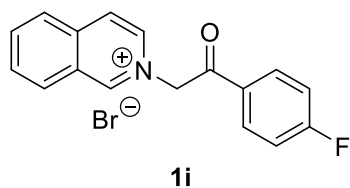

*2-(2-(4-fluorophenyl)-2-oxoethyl)isoquinolin-2-ium bromide (1i)*. White solid, 836 mg, 48% yield. M.p. 203–204 °C. General procedures for synthesis of the salts **1** was followed.  $^1\text{H NMR}$  (500 MHz,  $\text{DMSO-}d_6$ )  $\delta$  10.10 (s, 1H), 8.79 (dd,  $J_1 = 1.0$  Hz,  $J_2 = 6.5$  Hz, 1H), 8.71 (d,  $J = 6.5$  Hz, 1H), 8.55 (d,  $J = 8.5$  Hz, 1H), 8.43 (d,  $J = 8.5$  Hz, 1H), 8.34 – 8.31 (m, 1H), 8.24 – 8.20 (m, 2H), 8.13 – 8.10 (m, 1H), 7.55 – 7.51 (m, 2H), 6.71 (s, 2H).  $^{13}\text{C NMR}$  (126 MHz,  $\text{DMSO-}d_6$ )  $\delta$  190.2, 167.3, 165.3, 152.2, 138.0, 137.8, 136.8, 132.1, 132.0 (d,  $J = 9.7$  Hz), 131.5 (d,  $J = 100.9$  Hz), 130.9 (d,  $J = 2.8$  Hz), 127.9, 127.4, 126.0, 116.9 (d,  $J = 22.2$  Hz), 66.5. **HRMS-ESI** ( $m/z$ ) calcd. for  $[\text{C}_{17}\text{H}_{13}\text{FNO}]^+$  ( $[\text{M-Br}]^+$ ): 266.0976, found: 266.0985.

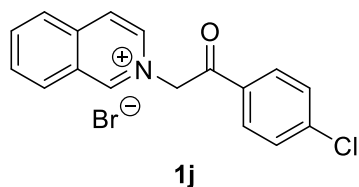

*2-(2-(4-chlorophenyl)-2-oxoethyl)isoquinolin-2-ium bromide (1j)*. White solid, 923 mg, 51% yield. M.p. 215–217 °C. General procedures for synthesis of the salts **1** was followed. The compound was reported in literature.<sup>[4]</sup>  $^1\text{H NMR}$  (500 MHz,  $\text{DMSO-}d_6$ )  $\delta$  10.07 (s, 1H), 8.76 (dd,  $J_1 = 1.0$  Hz,  $J_2 = 6.5$  Hz, 1H), 8.70 (d,  $J = 6.5$  Hz, 1H), 8.55 (d,  $J = 8.5$  Hz, 1H), 8.43 (d,  $J = 8.5$  Hz, 1H), 8.35 – 8.32 (m, 1H), 8.14 – 8.10 (m, 3H),

7.78 – 7.76 (m, 2H), 6.68 (s, 2H).

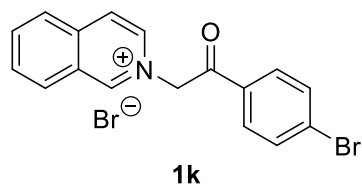

*2-(2-(4-bromophenyl)-2-oxoethyl)isoquinolin-2-ium bromide (1k)*. White solid, 1018 mg, 50% yield. M.p. 248–249 °C. General procedures for synthesis of the salts **1** was followed. The NMR data is identical to that reported in literature.<sup>[5]</sup> **<sup>1</sup>H NMR** (500 MHz, DMSO-*d*<sub>6</sub>)  $\delta$  10.08 (s, 1H), 8.77 (dd,  $J_1 = 1.0$  Hz,  $J_2 = 6.5$  Hz, 1H), 8.70 (d,  $J = 7.0$  Hz, 1H), 8.55 (d,  $J = 8.5$  Hz, 1H), 8.43 (d,  $J = 8.5$  Hz, 1H), 8.35 – 8.31 (m, 1H), 8.13 – 8.10 (m, 1H), 8.07 – 8.04 (m, 2H), 7.92 – 7.90 (m, 2H), 6.68 (s, 2H).

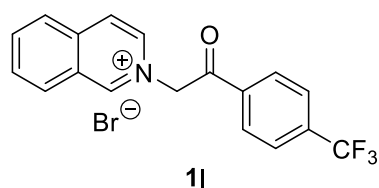

*2-(2-oxo-2-(4-(trifluoromethyl)phenyl)ethyl)isoquinolin-2-ium bromide (1l)*. White solid, 832 mg, 42% yield. M.p. 210–211 °C. General procedures for synthesis of the salts **1** was followed. **<sup>1</sup>H NMR** (500 MHz, DMSO-*d*<sub>6</sub>)  $\delta$  10.15 (s, 1H), 8.83 (dd,  $J_1 = 1.0$  Hz,  $J_2 = 6.5$  Hz, 1H), 8.73 (d,  $J = 7.0$  Hz, 1H), 8.56 (d,  $J = 8.0$  Hz, 1H), 8.43 (d,  $J = 8.5$  Hz, 1H), 8.34 – 8.31 (m, 3H), 8.13 – 8.10 (m, 1H), 8.06 (d,  $J = 8.0$  Hz, 2H), 6.82 (s, 2H). **<sup>13</sup>C NMR** (126 MHz, DMSO-*d*<sub>6</sub>)  $\delta$  190.6, 151.6, 137.5, 137.3, 136.9, 136.3, 133.6 (q,  $J = 32.2$  Hz), 131.4, 130.6, 129.2, 127.4, 126.8, 126.1 (q,  $J = 3.7$  Hz), 125.4, 123.6 (q,  $J = 273.4$  Hz), 66.2. **HRMS-ESI** (m/z) calcd. for [C<sub>18</sub>H<sub>13</sub>F<sub>3</sub>NO]<sup>+</sup> ([M-Br]<sup>+</sup>): 316.0944, found: 316.0939.



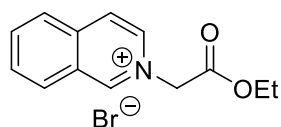

**1m**

*2-(2-ethoxy-2-oxoethyl)isoquinolin-2-ium bromide (1m)*. White solid, 1110 mg, 75% yield. M.p. 194–196 °C. General procedures for synthesis of the salts **1** was followed. The NMR data is identical to that reported in literature.<sup>[5]</sup> **<sup>1</sup>H NMR** (500 MHz, D<sub>2</sub>O)  $\delta$  9.72 (s, 1H), 8.50 (d,  $J = 6.5$  Hz, 1H), 8.46 – 8.43 (m, 2H), 8.26 – 8.25 (m, 2H), 8.08 – 8.04 (m, 1H), 5.72 (s, 2H), 4.38 (q,  $J = 7.5$  Hz, 2H), 1.33 (t,  $J = 7.5$  Hz, 3H).

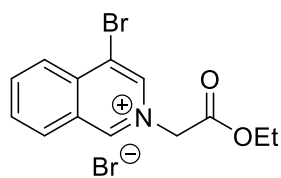

**1n**

*4-bromo-2-(2-ethoxy-2-oxoethyl)isoquinolin-2-ium bromide (1n)*. Light yellow solid, 844 mg, 45% yield. M.p. 135–137 °C. General procedures for synthesis of the salts **1** was followed. **<sup>1</sup>H NMR** (500 MHz, DMSO-*d*<sub>6</sub>)  $\delta$  10.34 (s, 1H), 9.39 (d,  $J = 1.0$  Hz, 1H), 8.63 (d,  $J = 8.0$  Hz, 1H), 8.48 – 8.44 (m, 1H), 8.38 (d,  $J = 8.5$  Hz, 1H), 8.21– 8.18 (m, 1H), 5.89 (s, 2H), 4.26 (q,  $J = 7.0$  Hz, 2H), 1.26 (t,  $J = 7.5$  Hz, 3H). **<sup>13</sup>C NMR** (126 MHz, DMSO-*d*<sub>6</sub>)  $\delta$  166.1, 151.8, 139.5, 137.2, 136.0, 132.3, 131.9, 126.7, 126.0, 120.8, 62.4, 60.0, 13.9. **HRMS-ESI** ( $m/z$ ) calcd. for [C<sub>13</sub>H<sub>13</sub>BrNO<sub>2</sub>]<sup>+</sup> ([M-Br]<sup>+</sup>): 294.0124, found: 294.0131.

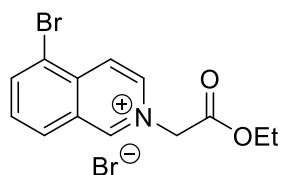

**1o**

*5-bromo-2-(2-ethoxy-2-oxoethyl)isoquinolin-2-ium bromide (1o)*. White solid, 806 mg, 43% yield. M.p. 202–204 °C. General procedures for synthesis of the salts **1** was followed. **<sup>1</sup>H NMR** (500 MHz, DMSO-*d*<sub>6</sub>)  $\delta$  10.30 (s, 1H), 8.94 (d,  $J = 7.0$  Hz, 1H),

8.70 (d,  $J = 7.0$  Hz, 1H), 8.66 (d,  $J = 7.5$  Hz, 1H), 8.58 (d,  $J = 8.0$  Hz, 1H), 8.01 (t,  $J = 7.5$  Hz, 1H), 5.92 (s, 2H), 4.26 (q,  $J = 7.0$  Hz, 2H), 1.27 (t,  $J = 7.5$  Hz, 3H).  $^{13}\text{C}$  NMR (126 MHz, DMSO- $d_6$ )  $\delta$  166.2, 152.5, 141.0, 137.8, 136.0, 132.3, 130.9, 128.0, 124.3, 120.9, 62.4, 60.2, 13.9. **HRMS-ESI** ( $m/z$ ) calcd. for  $[\text{C}_{13}\text{H}_{13}\text{BrNO}_2]^+$  ( $[\text{M}-\text{Br}]^+$ ): 294.0124, found: 294.0131.

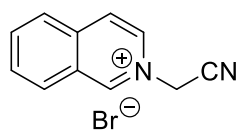

**1p**

*2-(cyanomethyl)isoquinolin-2-ium bromide (1p)*. White solid, 722 mg, 58% yield. M.p. 203–205 °C. General procedures for synthesis of the salts **1** was followed. The NMR data is identical to that reported in literature.<sup>[6]</sup>  $^1\text{H}$  NMR (500 MHz, DMSO- $d_6$ )  $\delta$  10.32 (s, 1H), 8.91 (dd,  $J_1 = 1.5$  Hz,  $J_2 = 6.5$  Hz, 1H), 8.71 (d,  $J = 7.0$  Hz, 1H), 8.60 (d,  $J = 8.0$  Hz, 1H), 8.41 (d,  $J = 8.5$  Hz, 1H), 8.35 – 8.31 (m, 1H), 8.14 – 8.10 (m, 1H), 6.23 (s, 2H).

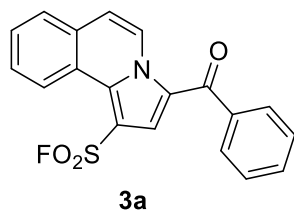

**3a**

*3-benzoylpyrrolo[2,1-a]isoquinoline-1-sulfonyl fluoride (3a)*. Yellow solid, 212 mg, 60% yield. M.p. 198–199 °C. Purification by column chromatography on silica gel using petroleum ether / dichloromethane (3:1 to 1:1, v/v) as eluent.  $^1\text{H}$  NMR (500 MHz,  $\text{CDCl}_3$ )  $\delta$  9.66 (d,  $J = 7.5$  Hz, 1H), 8.97 (d,  $J = 8.0$  Hz, 1H), 7.86 (d,  $J = 7.0$  Hz, 4H), 7.79 – 7.74 (m, 2H), 7.65 (t,  $J = 7.5$  Hz, 1H), 7.55 (t,  $J = 7.8$  Hz, 2H), 7.43 (d,  $J = 7.5$  Hz, 1H).  $^{19}\text{F}$  NMR (471 MHz,  $\text{CDCl}_3$ )  $\delta$  65.67 (s, 1F).  $^{13}\text{C}$  NMR (126 MHz,  $\text{CDCl}_3$ )  $\delta$  185.9, 138.8, 134.7, 132.7, 130.9, 130.6, 129.3, 129.3, 129.1, 128.8, 127.6, 126.6 (d,  $J = 2.5$  Hz), 125.1, 123.7, 122.5, 117.1, 107.8 (d,  $J = 32.3$  Hz). **HRMS-ESI** ( $m/z$ ) calcd. for  $[\text{C}_{19}\text{H}_{13}\text{FNO}_3\text{S}]^+$  ( $[\text{M}+\text{H}]^+$ ): 354.0595, found: 354.0590.

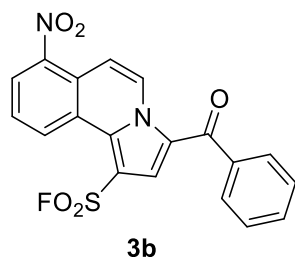

*3-benzoyl-7-nitropyrrolo[2,1-a]isoquinoline-1-sulfonyl fluoride (3b)*. Yellow solid, 295 mg, 74% yield. M.p. 211–213 °C. Purification by column chromatography on silica gel using petroleum ether / dichloromethane (3:1 to 1:1, v/v) as eluent. **<sup>1</sup>H NMR** (500 MHz, CDCl<sub>3</sub>) δ 9.81 (t, *J* = 6.8 Hz, 1H), 9.28 (t, *J* = 6.8 Hz, 1H), 8.42 (t, *J* = 6.5 Hz, 1H), 8.17 (t, *J* = 6.8 Hz, 1H), 7.93 – 7.87 (m, 4H), 7.69 (q, *J* = 6.8 Hz, 1H), 7.58 (q, *J* = 7.0 Hz, 2H). **<sup>19</sup>F NMR** (471 MHz, CDCl<sub>3</sub>) δ 65.68 (s, 1F). **<sup>13</sup>C NMR** (126 MHz, CDCl<sub>3</sub>) δ 185.8, 146.4, 138.2, 133.2, 132.7, 132.1, 132.1, 129.4, 129.0, 128.4, 128.0, 126.9, 124.1, 123.8, 110.9, 109.3 (d, *J* = 32.5 Hz). **HRMS-ESI** (*m/z*) calcd. for [C<sub>19</sub>H<sub>12</sub>FN<sub>2</sub>O<sub>5</sub>S]<sup>+</sup> ([M+H]<sup>+</sup>): 399.0445, found: 399.0440.

Note: In the <sup>13</sup>C NMR spectrum of **3b**, theoretically, there should be seventeen peaks. Due to the compact overlaying, it is difficult to specify the overlaying peaks.

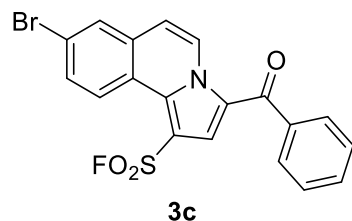

*3-benzoyl-8-bromopyrrolo[2,1-a]isoquinoline-1-sulfonyl fluoride (3c)*. Yellow solid, 240 mg, 56% yield. M.p. 245–247 °C. Purification by column chromatography on silica gel using petroleum ether / dichloromethane (3:1 to 1:1, v/v) as eluent. **<sup>1</sup>H NMR** (500 MHz, CDCl<sub>3</sub>) δ 9.69 (d, *J* = 7.5 Hz, 1H), 8.84 (d, *J* = 8.5 Hz, 1H), 8.03 (s, 1H), 7.87 – 7.85 (m, 4H), 7.66 (t, *J* = 7.0 Hz, 1H), 7.56 (t, *J* = 7.5 Hz, 1H), 7.36 (d, *J* = 7.0 Hz, 1H). **<sup>19</sup>F NMR** (471 MHz, CDCl<sub>3</sub>) δ 65.82 (s, 1F). **<sup>13</sup>C NMR** (126 MHz, CDCl<sub>3</sub>) δ 185.9, 138.7, 134.2, 132.9, 132.6, 132.2, 130.0, 129.3, 129.1, 128.9, 128.3 (d, *J* = 2.5 Hz), 126.2, 125.4, 124.0, 121.2, 116.0, 108.2 (d, *J* = 32.6 Hz). **HRMS-ESI** (*m/z*) calcd. for [C<sub>19</sub>H<sub>12</sub>BrFNO<sub>3</sub>S]<sup>+</sup> ([M+H]<sup>+</sup>): 431.9700, found: 431.9695.

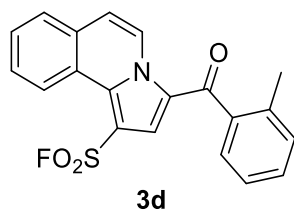

*3-(2-methylbenzoyl)pyrrolo[2,1-a]isoquinoline-1-sulfonyl fluoride (3d)*. Light yellow solid, 147 mg, 40% yield. M.p. 224–225 °C. Purification by column chromatography on silica gel using petroleum ether / dichloromethane (3:1 to 1:1, v/v) as eluent.  $^1\text{H NMR}$  (500 MHz,  $\text{CDCl}_3$ )  $\delta$  9.87 (d,  $J = 7.0$  Hz, 1H), 8.90 (d,  $J = 9.0$  Hz, 1H), 7.92 – 7.89 (m, 1H), 7.82 – 7.77 (m, 2H), 7.63 (s, 1H), 7.50 (d,  $J = 7.4$  Hz, 1H), 7.48 – 7.44 (m, 2H), 7.36 – 7.31 (m, 2H), 2.42 (s, 3H).  $^{19}\text{F NMR}$  (471 MHz,  $\text{CDCl}_3$ )  $\delta$  65.50 (s, 1F).  $^{13}\text{C NMR}$  (126 MHz,  $\text{CDCl}_3$ )  $\delta$  188.1, 138.7, 136.6, 134.8, 131.4, 131.0, 130.8, 130.7, 130.0, 129.4, 128.3, 127.7, 126.7 (d,  $J = 2.4$  Hz), 125.6, 125.2, 124.4, 122.5, 117.4, 107.9 (d,  $J = 32.5$  Hz), 19.8. **HRMS-ESI** ( $m/z$ ) calcd. for  $[\text{C}_{20}\text{H}_{15}\text{FNO}_3\text{S}]^+$  ( $[\text{M}+\text{H}]^+$ ):368.0751, found: 368.0748.

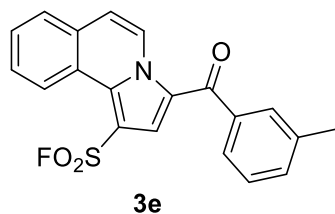

*3-(3-methylbenzoyl)pyrrolo[2,1-a]isoquinoline-1-sulfonyl fluoride (3e)*. White solid, 187 mg, 51% yield. M.p. 189–190 °C. Purification by column chromatography on silica gel using petroleum ether / dichloromethane (3:1 to 1:1, v/v) as eluent.  $^1\text{H NMR}$  (500 MHz,  $\text{CDCl}_3$ )  $\delta$  9.65 (d,  $J = 7.5$  Hz, 1H), 8.97 (d,  $J = 8.0$  Hz, 1H), 7.85 (s, 2H), 7.79 – 7.75 (m, 2H), 7.66 – 7.63 (m, 2H), 7.45 – 7.42 (m, 3H), 2.47 (s, 3H).  $^{19}\text{F NMR}$  (471 MHz,  $\text{CDCl}_3$ )  $\delta$  65.63 (s, 1F).  $^{13}\text{C NMR}$  (126 MHz,  $\text{CDCl}_3$ )  $\delta$  186.1, 138.8, 138.8, 134.7, 133.5, 130.8, 130.5, 129.7, 129.3, 129.1, 128.6, 127.6, 126.6 (d,  $J = 2.5$  Hz), 126.5, 125.1, 123.8, 122.5, 117.1, 107.6 (d,  $J = 32.4$  Hz), 21.6. **HRMS-ESI** ( $m/z$ ) calcd. for  $[\text{C}_{20}\text{H}_{15}\text{FNO}_3\text{S}]^+$  ( $[\text{M}+\text{H}]^+$ ):368.0751, found: 368.0748.

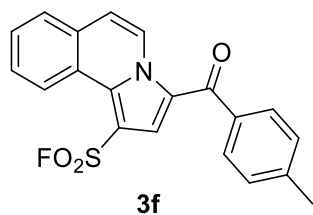

*3-(4-methylbenzoyl)pyrrolo[2,1-a]isoquinoline-1-sulfonyl fluoride (3f)*. Light yellow solid, 220 mg, 60% yield. M.p. 185–186 °C. Purification by column chromatography on silica gel using petroleum ether / dichloromethane (3:1 to 1:1, v/v) as eluent.  $^1\text{H NMR}$  (500 MHz,  $\text{CDCl}_3$ )  $\delta$  9.63 (d,  $J = 7.5$  Hz, 1H), 8.97 (d,  $J = 8.0$  Hz, 1H), 7.87 – 7.85 (m, 2H), 7.79 – 7.74 (m, 4H), 7.42 (d,  $J = 7.5$  Hz, 1H), 7.36 (d,  $J = 8.0$  Hz, 2H), 2.48 (s, 3H).  $^{19}\text{F NMR}$  (471 MHz,  $\text{CDCl}_3$ )  $\delta$  65.68 (s, 1F).  $^{13}\text{C NMR}$  (126 MHz,  $\text{CDCl}_3$ )  $\delta$  185.7, 143.6, 136.0, 134.6, 130.8, 130.5, 129.5, 129.5, 129.3, 128.8, 127.6, 126.6, (d,  $J = 2.3$  Hz), 125.1, 123.8, 122.5, 117.0, 107.5 (d,  $J = 32.3$  Hz), 21.8. **HRMS-ESI** (m/z) calcd. for  $[\text{C}_{20}\text{H}_{15}\text{FNO}_3\text{S}]^+$  ( $[\text{M}+\text{H}]^+$ ): 368.0751, found: 368.0758.

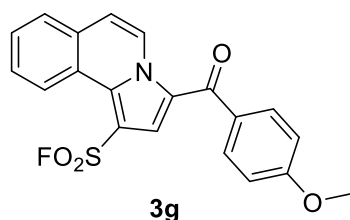

*3-(4-methoxybenzoyl)pyrrolo[2,1-a]isoquinoline-1-sulfonyl fluoride (3g)*. Light yellow solid, 195 mg, 51% yield. M.p. 204–206 °C. Purification by column chromatography on silica gel using petroleum ether / dichloromethane (3:1 to 1:1, v/v) as eluent.  $^1\text{H NMR}$  (500 MHz,  $\text{CDCl}_3$ )  $\delta$  9.54 (d,  $J = 7.5$  Hz, 1H), 8.95 (d,  $J = 8.0$  Hz, 1H), 7.88 (d,  $J = 7.0$  Hz, 2H), 7.83 (s, 2H), 7.74 (s, 2H), 7.38 (d,  $J = 7.5$  Hz, 1H), 7.03 (d,  $J = 8.0$  Hz, 2H), 3.92 (s, 3H).  $^{19}\text{F NMR}$  (471 MHz,  $\text{CDCl}_3$ )  $\delta$  65.74 (s, 1F).  $^{13}\text{C NMR}$  (126 MHz,  $\text{CDCl}_3$ )  $\delta$  184.5, 163.5, 134.5, 131.7, 131.2, 130.7, 130.4, 129.2, 128.1, 127.6, 126.5 (d,  $J = 2.3$  Hz), 125.0, 123.9, 122.5, 116.8, 114.1, 107.3 (d,  $J = 32.1$  Hz), 55.7. **HRMS-ESI** (m/z) calcd. for  $[\text{C}_{20}\text{H}_{15}\text{FNO}_4\text{S}]^+$  ( $[\text{M}+\text{H}]^+$ ): 384.0700, found: 384.0693.

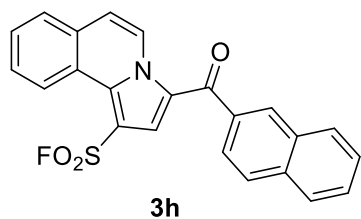

*3-(2-naphthoyl)pyrrolo[2,1-a]isoquinoline-1-sulfonyl fluoride (3h)*. Yellow solid, 173 mg, 43% yield. M.p. 205–207 °C. Purification by column chromatography on silica gel using petroleum ether / dichloromethane (3:1 to 1:1, v/v) as eluent.  $^1\text{H NMR}$  (500 MHz,  $\text{CDCl}_3$ )  $\delta$  9.65 (s, 1H), 8.98 (s, 1H), 8.37 (s, 1H), 7.99 – 7.76 (m, 8H), 7.62 (s, 2H), 7.41 (s, 1H).  $^{19}\text{F NMR}$  (471 MHz,  $\text{CDCl}_3$ )  $\delta$  65.69 (s, 1F).  $^{13}\text{C NMR}$  (126 MHz,  $\text{CDCl}_3$ )  $\delta$  185.7, 135.9, 135.3, 134.7, 132.4, 130.8, 130.6, 130.5, 129.5, 129.3, 129.0, 128.8, 128.5, 127.9, 127.6, 127.2, 126.6 (d,  $J = 2.3$  Hz), 125.2, 125.0, 123.8, 122.4, 117.0, 107.7 (d,  $J = 32.4$  Hz). **HRMS-ESI** (m/z) calcd. for  $[\text{C}_{23}\text{H}_{15}\text{FNO}_3\text{S}]^+$  ( $[\text{M}+\text{H}]^+$ ): 404.0751, found: 404.0759.

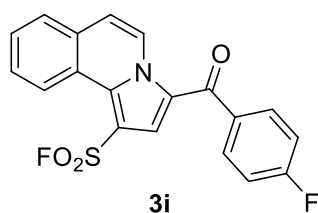

*3-(4-fluorobenzoyl)pyrrolo[2,1-a]isoquinoline-1-sulfonyl fluoride (3i)*. Yellow solid, 207 mg, 56% yield. M.p. 228–229 °C. Purification by column chromatography on silica gel using petroleum ether / dichloromethane (3:1 to 1:1, v/v) as eluent.  $^1\text{H NMR}$  (500 MHz,  $\text{CD}_2\text{Cl}_2$ )  $\delta$  9.58 (d,  $J = 7.5$  Hz, 1H), 8.95 – 8.93 (m, 1H), 7.92 – 7.89 (m, 3H), 7.81 – 7.77 (m, 3H), 7.48 (d,  $J = 7.5$  Hz, 1H), 7.24 (t,  $J = 8.5$  Hz, 2H).  $^{19}\text{F NMR}$  (471 MHz,  $\text{CD}_2\text{Cl}_2$ )  $\delta$  65.20 (s, 1F), –106.75 – –106.80 (m, 1F).  $^{13}\text{C NMR}$  (126 MHz,  $\text{CD}_2\text{Cl}_2$ )  $\delta$  184.6, 165.8 (d,  $J = 253.8$  Hz), 135.5 (d,  $J = 3.2$  Hz), 135.2, 132.2 (d,  $J = 9.2$  Hz), 131.3, 130.9, 129.6, 129.0, 128.1, 126.7 (d,  $J = 2.5$  Hz), 125.3, 124.0, 122.7, 117.5, 116.2 (d,  $J = 22.1$  Hz), 107.8 (d,  $J = 32.4$  Hz). **HRMS-ESI** (m/z) calcd. for  $[\text{C}_{19}\text{H}_{12}\text{F}_2\text{NO}_3\text{S}]^+$  ( $[\text{M}+\text{H}]^+$ ): 372.0500, found: 372.0491.

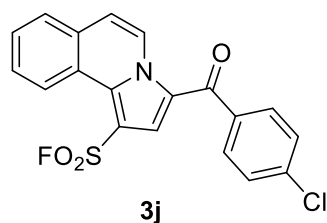

*3-(4-chlorobenzoyl)pyrrolo[2,1-a]isoquinoline-1-sulfonyl fluoride (3j)*. Light yellow solid, 237 mg, 61% yield. M.p. 215–216 °C. Purification by column chromatography on silica gel using petroleum ether / dichloromethane (3:1 to 1:1, v/v) as eluent. <sup>1</sup>H NMR (500 MHz, CDCl<sub>3</sub>) δ 9.63 (d, *J* = 7.5 Hz, 1H), 8.97 (d, *J* = 9.5 Hz, 1H), 7.89 – 7.87 (m, 1H), 7.82 (d, *J* = 2.5 Hz, 2H), 7.81 – 7.77 (m, 3H), 7.53 (d, *J* = 8.5 Hz, 2H), 7.45 (d, *J* = 7.5 Hz, 1H). <sup>19</sup>F NMR (471 MHz, CDCl<sub>3</sub>) δ 65.60 (s, 1F). <sup>13</sup>C NMR (126 MHz, CDCl<sub>3</sub>) δ 184.5, 139.2, 137.1, 134.9, 130.9, 130.7, 130.7, 129.4, 129.2, 129.0, 127.7, 126.7 (d, *J* = 2.5 Hz), 125.0, 123.4, 122.4, 117.3, 108.0 (d, *J* = 32.4 Hz). HRMS-ESI (m/z) calcd. for [C<sub>19</sub>H<sub>12</sub>ClFNO<sub>3</sub>S]<sup>+</sup> ([M+H]<sup>+</sup>): 388.0205, found: 388.0210.

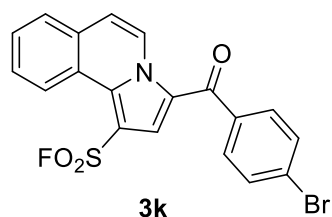

*3-(4-bromobenzoyl)pyrrolo[2,1-a]isoquinoline-1-sulfonyl fluoride (3k)*. Light yellow solid, 242 mg, 56% yield. M.p. 217–218 °C. Purification by column chromatography on silica gel using petroleum ether / dichloromethane (3:1 to 1:1, v/v) as eluent. <sup>1</sup>H NMR (500 MHz, CDCl<sub>3</sub>) δ 9.63 (d, *J* = 7.5 Hz, 1H), 8.97 (d, *J* = 8.5 Hz, 1H), 7.89 – 7.86 (m, 1H), 7.82 (s, 1H), 7.81 – 7.76 (m, 2H), 7.72 (q, *J* = 8.8 Hz, 4H), 7.45 (d, *J* = 7.5 Hz, 1H). <sup>19</sup>F NMR (471 MHz, CDCl<sub>3</sub>) δ 65.61 (s, 1F). <sup>13</sup>C NMR (126 MHz, CDCl<sub>3</sub>) δ 184.7, 137.5, 134.9, 132.2, 130.9, 130.8, 130.7, 129.4, 129.1, 127.7, 127.7, 126.7 (d, *J* = 2.4 Hz), 125.0, 123.3, 122.4, 117.3, 108.0 (d, *J* = 32.4 Hz). HRMS-ESI (m/z) calcd. for [C<sub>19</sub>H<sub>12</sub>BrFNO<sub>3</sub>S]<sup>+</sup> ([M+H]<sup>+</sup>): 431.9700, found: 431.9707.

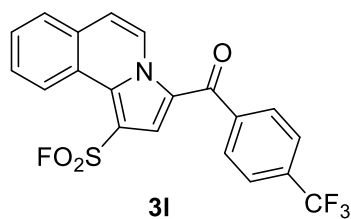

*3-(4-(trifluoromethyl)benzoyl)pyrrolo[2,1-a]isoquinoline-1-sulfonyl fluoride (3l).*

White solid, 248 mg, 59% yield. M.p. 214–215 °C. Purification by column chromatography on silica gel using petroleum ether / dichloromethane (3:1 to 1:1, v/v) as eluent. <sup>1</sup>H NMR (500 MHz, CD<sub>2</sub>Cl<sub>2</sub>) δ 9.68 (d, *J* = 7.5 Hz, 1H), 8.97 – 8.95 (m, 1H), 7.97 (d, *J* = 8.0 Hz, 2H), 7.95 – 7.93 (m, 1H), 7.85 (s, 1H), 7.83 – 7.80 (m, 4H), 7.53 (d, *J* = 7.5 Hz, 1H). <sup>19</sup>F NMR (471 MHz, CDCl<sub>3</sub>) δ 65.11 (s, 1F), δ -63.32 (s, 1F). <sup>13</sup>C NMR (126 MHz, CDCl<sub>3</sub>) δ 184.6, 142.0, 135.2, 134.1 (q, *J* = 32.9 Hz), 131.1, 130.9, 129.6, 129.6, 129.5, 127.7, 126.8 (d, *J* = 2.5 Hz), 125.9 (q, *J* = 3.8 Hz), 125.0, 123.7 (q, *J* = 273.2 Hz), 123.2, 122.5, 117.6, 108.4 (d, *J* = 32.8 Hz). HRMS-ESI (*m/z*) calcd. for [C<sub>20</sub>H<sub>12</sub>F<sub>4</sub>NO<sub>3</sub>S]<sup>+</sup> ([M+H]<sup>+</sup>): 422.0469, found: 422.0461.

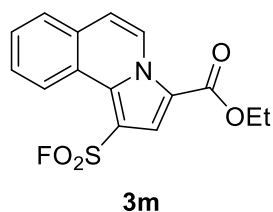

*ethyl 1-(fluorosulfonyl)pyrrolo[2,1-a]isoquinoline-3-carboxylate (3m).*

White solid, 177 mg, 55% yield. M.p. 181–182 °C. Purification by column chromatography on silica gel using petroleum ether / dichloromethane (3:1 to 1:1, v/v) as eluent. <sup>1</sup>H NMR (500 MHz, CD<sub>2</sub>Cl<sub>2</sub>) δ 9.39 (d, *J* = 7.5 Hz, 1H), 8.89 (d, *J* = 8.5 Hz, 1H), 8.04 (s, 1H), 7.76 (dd, *J*<sub>1</sub> = 1.0, *J*<sub>2</sub> = 7.5 Hz, 1H), 7.72 – 7.66 (m, 2H), 7.29 (d, *J* = 7.5 Hz, 1H), 4.43 (q, *J* = 7.0 Hz, 2H), 1.44 (t, *J* = 7.0 Hz, 3H). <sup>19</sup>F NMR (471 MHz, CDCl<sub>3</sub>) δ 65.57 (s, 1F). <sup>13</sup>C NMR (126 MHz, CDCl<sub>3</sub>) δ 160.3, 133.8, 130.0, 129.9, 129.1, 127.5, 126.3 (d, *J* = 2.6 Hz), 124.9, 124.2, 122.6, 116.6, 116.5, 107.2 (d, *J* = 32.3 Hz), 61.3, 14.5.

HRMS-ESI (*m/z*) calcd. for [C<sub>15</sub>H<sub>13</sub>FNO<sub>4</sub>S]<sup>+</sup> ([M+H]<sup>+</sup>): 322.0544, found: 322.0550.



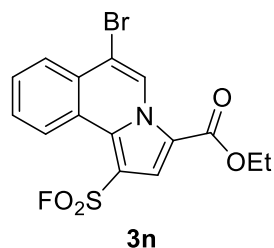

*ethyl 6-bromo-1-(fluorosulfonyl)pyrrolo[2,1-a]isoquinoline-3-carboxylate (3n)*. White solid, 316 mg, 79% yield. M.p. 196–197 °C. Purification by column chromatography on silica gel using petroleum ether / dichloromethane (3:1 to 1:1, v/v) as eluent.  $^1\text{H NMR}$  (500 MHz,  $\text{CDCl}_3$ )  $\delta$  9.77 (s, 1H), 8.91 – 8.90 (m, 1H), 8.20 – 8.17 (m, 1H), 8.03 (s, 1H), 7.81 – 7.77 (m, 2H), 4.45 (q,  $J = 7.0$  Hz, 2H), 1.45 (t,  $J = 7.0$  Hz, 3H).  $^{19}\text{F NMR}$  (471 MHz,  $\text{CDCl}_3$ )  $\delta$  65.45 (s, 1F).  $^{13}\text{C NMR}$  (126 MHz,  $\text{CDCl}_3$ )  $\delta$  160.1, 132.9, 130.9, 130.1, 128.7, 127.3, 126.6 (d,  $J = 2.5$  Hz), 125.4, 125.0, 122.6, 116.4, 113.1, 107.9 (d,  $J = 32.5$  Hz), 61.6, 14.5. **HRMS-ESI** (m/z) calcd. for  $[\text{C}_{15}\text{H}_{12}\text{BrFNO}_4\text{S}]^+$  ( $[\text{M}+\text{H}]^+$ ): 399.9649, found: 399.9641.

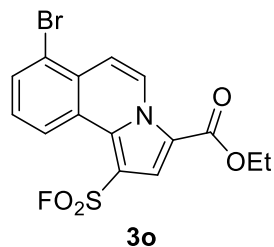

*ethyl 7-bromo-1-(fluorosulfonyl)pyrrolo[2,1-a]isoquinoline-3-carboxylate (3o)*. White solid, 216 mg, 54% yield. M.p. 225–227 °C. Purification by column chromatography on silica gel using petroleum ether / dichloromethane (3:1 to 1:1, v/v) as eluent.  $^1\text{H NMR}$  (500 MHz,  $\text{CDCl}_3$ )  $\delta$  9.52 (d,  $J = 7.5$  Hz, 1H), 8.90 (d,  $J = 8.0$  Hz, 1H), 8.10 (s, 1H), 7.97 (dd,  $J_1 = 1.0$  Hz,  $J_2 = 7.5$  Hz, 1H), 7.81 (d,  $J = 7.5$  Hz, 1H), 7.58 (t,  $J = 8.0$  Hz, 1H), 4.45 (q,  $J = 7.0$  Hz, 2H), 1.45 (t,  $J = 7.5$  Hz, 3H).  $^{19}\text{F NMR}$  (471 MHz,  $\text{CDCl}_3$ )  $\delta$  65.46 (s, 1F).  $^{13}\text{C NMR}$  (126 MHz,  $\text{CDCl}_3$ )  $\delta$  160.2, 134.0, 132.9, 129.6, 129.1, 125.9 (d,  $J = 2.5$  Hz), 125.5, 125.5, 124.2, 122.5, 116.8, 115.3, 108.1 (d,  $J = 32.4$  Hz), 61.5, 14.5. **HRMS-ESI** (m/z) calcd. for  $[\text{C}_{15}\text{H}_{12}\text{BrFNO}_4\text{S}]^+$  ( $[\text{M}+\text{H}]^+$ ): 399.9649, found: 399.9645.

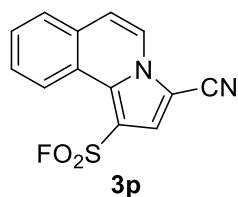

*3-cyanopyrrolo[2,1-a]isoquinoline-1-sulfonyl fluoride (3I)*. White solid, 197 mg, 72% yield. M.p. 189–190 °C. Purification by column chromatography on silica gel using petroleum ether / dichloromethane (3:1 to 1:1, v/v) as eluent. <sup>1</sup>H NMR (500 MHz, CDCl<sub>3</sub>) δ 8.92 (d, *J* = 8.0 Hz, 1H), 8.22 (d, *J* = 7.0 Hz, 1H), 7.88 (d, *J* = 7.5 Hz, 2H), 7.83 – 7.77 (m, 2H), 7.47 (d, *J* = 7.5 Hz, 1H). <sup>19</sup>F NMR (471 MHz, CDCl<sub>3</sub>) δ 65.73 (s, 1F). <sup>13</sup>C NMR (126 MHz, CDCl<sub>3</sub>) δ 133.3, 130.9, 130.1, 130.1, 128.1, 126.4 (d, *J* = 2.4 Hz), 125.9, 122.7, 122.2, 117.9, 111.0, 108.3 (d, *J* = 33.6 Hz), 99.5. HRMS-ESI (*m/z*) calcd. for [C<sub>13</sub>H<sub>8</sub>FN<sub>2</sub>O<sub>2</sub>S]<sup>+</sup> ([M+H]<sup>+</sup>): 275.0285, found: 275.0280.

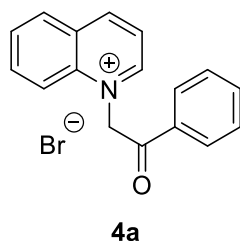

*1-(2-oxo-2-phenylethyl)quinolin-1-ium bromide (4a)*. White solid, 1361 mg, 83% yield. M.p. 203–205 °C. General procedures for synthesis of the salts **4** was followed. The NMR data is identical to that reported in literature.<sup>[2]</sup> <sup>1</sup>H NMR (500 MHz, DMSO-*d*<sub>6</sub>) δ 9.61 (dd, *J*<sub>1</sub> = 1.5 Hz, *J*<sub>2</sub> = 6.0 Hz, 1H), 9.48 (d, *J* = 8.0 Hz, 1H), 8.57 (dd, *J*<sub>1</sub> = 1.5 Hz, *J*<sub>2</sub> = 8.5 Hz, 1H), 8.47 (d, *J* = 9.0 Hz, 1H), 8.34 (dd, *J*<sub>1</sub> = 5.5 Hz, *J*<sub>2</sub> = 8.0 Hz, 1H), 8.24 – 8.20 (m, 1H), 8.18 – 8.16 (m, 2H), 8.06 (t, *J* = 7.5 Hz, 1H), 7.84 – 7.81 (m, 1H), 7.71 – 7.68 (m, 2H), 7.10(s, 2H).

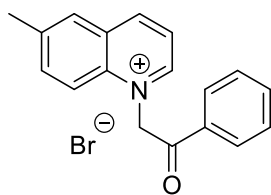

**4b**

*6-methyl-1-(2-oxo-2-phenylethyl)quinolin-1-ium bromide (4b)*. White solid, 906 mg, 53% yield. M.p. 219–221 °C. General procedures for synthesis of the salts **4** was followed. The compound was reported in literature.<sup>[7]</sup> <sup>1</sup>H NMR (500 MHz, DMSO-*d*<sub>6</sub>) δ 9.56 – 9.55 (m, 1H), 9.34 (d, *J* = 8.5 Hz, 1H), 8.37 (d, *J* = 9.0 Hz, 1H), 8.31 (s, 1H), 8.28 (dd, *J*<sub>1</sub> = 5.5 Hz, *J*<sub>2</sub> = 8.5 Hz, 1H), 8.18 – 8.16 (m, 2H), 8.06 (dd, *J*<sub>1</sub> = 2.0 Hz, *J*<sub>2</sub> = 9.5 Hz, 1H), 7.83 – 7.80 (m, 1H), 7.69 (t, *J* = 7.7 Hz, 2H), 7.10 (s, 2H), 2.60 (s, 3H).

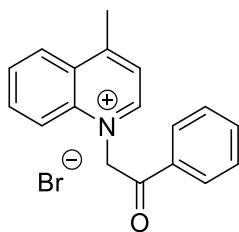

**4c**

*4-methyl-1-(2-oxo-2-phenylethyl)quinolin-1-ium bromide (4c)*. White solid, 940 mg, 55% yield. M.p. 225–226 °C. General procedures for synthesis of the salts **4** was followed. The NMR data is identical to that reported in literature.<sup>[8]</sup> <sup>1</sup>H NMR (500 MHz, DMSO-*d*<sub>6</sub>) δ 9.53 (d, *J* = 6.0 Hz, 1H), 8.60 – 8.57 (m, 1H), 8.42 (d, *J* = 9.0 Hz, 1H), 8.23 (d, *J* = 6.5 Hz, 1H), 8.20 – 8.16 (m, 3H), 8.05 – 8.02 (m, 1H), 7.83 – 7.79 (m, 1H), 7.68 (t, *J* = 7.5 Hz, 2H), 7.11 (s, 2H), 3.07 (s, 3H).

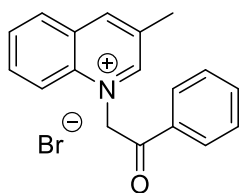

**4d**

*3-methyl-1-(2-oxo-2-phenylethyl)quinolin-1-ium bromide (4d)*. White solid, 991 mg, 58% yield. M.p. 226–227 °C. General procedures for synthesis of the salts **4** was followed. The compound was reported in literature.<sup>[7]</sup> <sup>1</sup>H NMR (500 MHz, DMSO-*d*<sub>6</sub>)

$\delta$  9.64 (d,  $J = 2.0$  Hz, 1H), 9.29 (s, 1H), 8.44 – 8.40 (m, 2H), 8.18 – 8.16 (m, 2H), 8.15 – 8.11 (m, 1H), 8.02 – 7.99 (m, 1H), 7.84 – 7.81 (m, 1H), 7.71 – 7.68 (m, 2H), 7.07 (s, 2H), 2.67 (s, 3H).

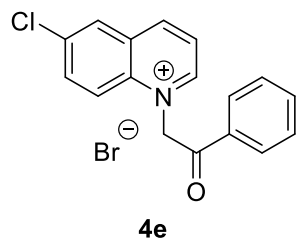

*6-chloro-1-(2-oxo-2-phenylethyl)quinolin-1-ium bromide (4e)*. Yellow solid, 832 mg, 46% yield. M.p. 203–205 °C. General procedures for synthesis of the salts **4** was followed. The compound was reported in literature.<sup>[7]</sup> <sup>1</sup>H NMR (500 MHz, DMSO-*d*<sub>6</sub>)  $\delta$  9.62 (dd,  $J_1 = 1.0$  Hz,  $J_2 = 6.0$  Hz, 1H), 9.40 (d,  $J = 8.0$  Hz, 1H), 8.75 (d,  $J = 2.5$  Hz, 1H), 8.55 (d,  $J = 9.5$  Hz, 1H), 8.39 (dd,  $J_1 = 6.0$  Hz,  $J_2 = 8.5$  Hz, 1H), 8.26 (dd,  $J_1 = 2.5$  Hz,  $J_2 = 9.5$  Hz, 1H), 8.16 – 8.14 (m, 2H), 7.84 – 7.81 (m, 1H), 7.71 – 7.68 (m, 2H), 7.09 (s, 2H).

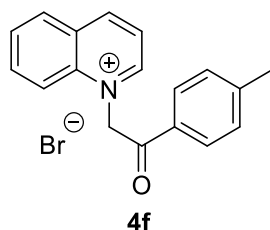

*1-(2-oxo-2-(p-tolyl)ethyl)quinolin-1-ium bromide (4f)*. White solid, 975 mg, 57% yield. M.p. 215–216 °C. General procedures for synthesis of the salts **4** was followed. The compound was reported in literature.<sup>[3]</sup> <sup>1</sup>H NMR (500 MHz, DMSO-*d*<sub>6</sub>)  $\delta$  9.58 (d,  $J = 5.5$  Hz, 1H), 9.46 (d,  $J = 8.5$  Hz, 1H), 8.56 (dd,  $J_1 = 1.5$  Hz,  $J_2 = 8.5$  Hz, 1H), 8.42 (d,  $J = 9.0$  Hz, 1H), 8.33 (dd,  $J_1 = 5.5$  Hz,  $J_2 = 8.0$  Hz, 1H), 8.23 – 8.20 (m, 1H), 8.08 – 8.05 (m, 3H), 7.50 (d,  $J = 8.0$  Hz, 2H), 7.04 (s, 2H), 2.46 (s, 3H).

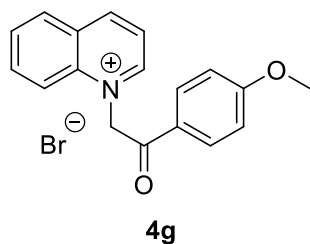

*1-(2-(4-methoxyphenyl)-2-oxoethyl)quinolin-1-ium bromide (4g)*. White solid, 949 mg, 53% yield. M.p. 218–220 °C. General procedures for synthesis of the salts **4** was followed. The compound was reported in literature.<sup>[3]</sup> <sup>1</sup>H NMR (500 MHz, DMSO-*d*<sub>6</sub>) δ 9.55 – 9.53 (m, 1H), 9.45 (d, *J* = 8.5 Hz, 1H), 8.55 (dd, *J*<sub>1</sub> = 1.5 Hz, *J*<sub>2</sub> = 8.0 Hz, 1H), 8.40 (d, *J* = 9.0 Hz, 1H), 8.32 (dd, *J*<sub>1</sub> = 6.0 Hz, *J*<sub>2</sub> = 8.5 Hz, 1H), 8.24 – 8.20 (m, 1H), 8.15 – 8.12 (m, 2H), 8.06 (t, *J* = 7.5 Hz, 1H), 7.23 – 7.20 (m, 2H), 6.98 (s, 2H), 3.92 (s, 3H).

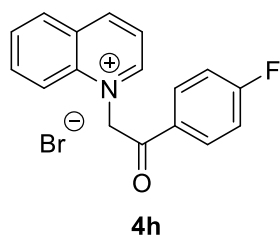

*1-(2-(4-fluorophenyl)-2-oxoethyl)quinolin-1-ium bromide (4h)*. Yellow solid, 675 mg, 39% yield. M.p. 231–233 °C. General procedures for synthesis of the salts **4** was followed. The compound was reported in literature.<sup>[9]</sup> <sup>1</sup>H NMR (500 MHz, DMSO-*d*<sub>6</sub>) δ 9.60 (dd, *J*<sub>1</sub> = 1.5 Hz, *J*<sub>2</sub> = 6.0 Hz, 1H), 9.48 (d, *J* = 8.5 Hz, 1H), 8.57 (dd, *J*<sub>1</sub> = 1.0 Hz, *J*<sub>2</sub> = 8.0 Hz, 1H), 8.48 (d, *J* = 9.0 Hz, 1H), 8.34 (dd, *J*<sub>1</sub> = 6.0 Hz, *J*<sub>2</sub> = 8.5 Hz, 1H), 8.28 – 8.20 (m, 3H), 8.06 (t, *J* = 7.5 Hz, 1H), 7.57 – 7.52 (m, 2H), 7.10 (s, 2H).

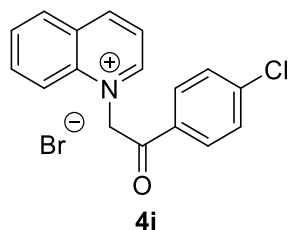

*1-(2-(4-chlorophenyl)-2-oxoethyl)quinolin-1-ium bromide (4i)*. White solid, 1050 mg, 58% yield. M.p. 218–219 °C. General procedures for synthesis of the salts **4** was followed. The compound was reported in literature.<sup>[10]</sup> <sup>1</sup>H NMR (500 MHz, DMSO-*d*<sub>6</sub>)

$\delta$  9.55 (dd,  $J_1 = 1.5$  Hz,  $J_2 = 6.0$  Hz, 1H), 9.46 (d,  $J = 8.0$  Hz, 1H), 8.56 (dd,  $J_1 = 1.5$  Hz,  $J_2 = 8.0$  Hz, 1H), 8.48 (d,  $J = 9.0$  Hz, 1H), 8.33 (dd,  $J_1 = 6.0$  Hz,  $J_2 = 8.5$  Hz, 1H), 8.24 – 8.21 (m, 1H), 8.18 – 8.15 (m, 2H), 8.07 (t,  $J = 7.0$  Hz, 1H), 7.80 – 7.77 (m, 2H), 7.04 (s, 2H).

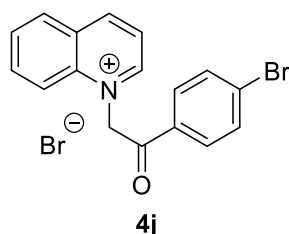

*1-(2-(4-bromophenyl)-2-oxoethyl)quinolin-1-ium bromide (4j)*. White solid, 1119 mg, 55% yield. M.p. 227–229 °C. General procedures for synthesis of the salts **4** was followed. The NMR data is identical to that reported in literature.<sup>[6]</sup> <sup>1</sup>H NMR (500 MHz, DMSO-*d*<sub>6</sub>)  $\delta$  9.65 (dd,  $J_1 = 1.5$  Hz,  $J_2 = 6.0$  Hz, 1H), 9.49 (d,  $J = 8.5$  Hz, 1H), 8.58 – 8.56 (m, 1H), 8.49 (d,  $J = 9.0$  Hz, 1H), 8.34 (dd,  $J_1 = 6.0$  Hz,  $J_2 = 8.5$  Hz, 1H), 8.23 – 8.19 (m, 1H), 8.11 – 8.08 (m, 2H), 8.05 (t,  $J = 7.5$  Hz, 1H), 7.93 – 7.90 (m, 2H), 7.13 (s, 2H).

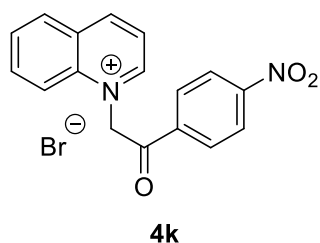

*1-(2-(4-nitrophenyl)-2-oxoethyl)quinolin-1-ium bromide (4k)*. Yellow solid, 1026 mg, 55% yield. M.p. 212–213 °C. General procedures for synthesis of the salts **4** was followed. The compound was reported in literature.<sup>[3]</sup> <sup>1</sup>H NMR (500 MHz, DMSO-*d*<sub>6</sub>)  $\delta$  9.61 (dd,  $J_1 = 1.5$  Hz,  $J_2 = 6.0$  Hz, 1H), 9.49 (d,  $J = 8.5$  Hz, 1H), 8.58 – 8.56 (m, 2H), 8.52 – 8.49 (m, 2H), 8.41 – 8.38 (m, 2H), 8.36 (dd,  $J_1 = 5.5$  Hz,  $J_2 = 8.0$  Hz, 1H), 8.25 – 8.21 (m, 1H), 8.08 (t,  $J = 7.5$  Hz, 1H), 7.15 (s, 2H).

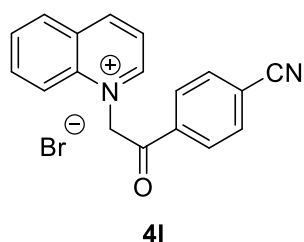

*1-(2-(4-cyanophenyl)-2-oxoethyl)quinolin-1-ium bromide (4l)*. White solid, 847 mg, 48% yield. M.p. 226–228 °C. General procedures for synthesis of the salts **4** was followed. The compound was reported in literature.<sup>[11]</sup> <sup>1</sup>H NMR (500 MHz, DMSO-*d*<sub>6</sub>) δ 9.61 (dd, *J*<sub>1</sub> = 1.0 Hz, *J*<sub>2</sub> = 6.0 Hz, 1H), 9.49 (d, *J* = 8.5 Hz, 1H), 8.58 – 8.56 (m, 1H), 8.54 (d, *J* = 9.0 Hz, 1H), 8.36 – 8.30 (m, 3H), 8.24 – 8.18 (m, 3H), 8.08 – 8.05 (m, 1H), 7.14 (s, 2H).

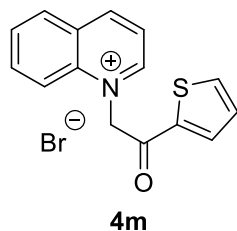

*1-(2-oxo-2-(thiophen-2-yl)ethyl)quinolin-1-ium bromide (4m)*. Yellow solid, 802 mg, 48% yield. M.p. 199–201 °C. General procedures for synthesis of the salts **4** was followed. The compound was reported in literature.<sup>[12]</sup> <sup>1</sup>H NMR (500 MHz, DMSO-*d*<sub>6</sub>) δ 9.62 (dd, *J*<sub>1</sub> = 1.5 Hz, *J*<sub>2</sub> = 6.0 Hz, 1H), 9.47 (d, *J* = 8.5 Hz, 1H), 8.56 (dd, *J*<sub>1</sub> = 1.0 Hz, *J*<sub>2</sub> = 8.5 Hz, 1H), 8.46 – 8.42 (m, 2H), 8.33 (dd, *J*<sub>1</sub> = 5.5 Hz, *J*<sub>2</sub> = 8.0 Hz, 1H), 8.28 – 8.22 (m, 2H), 8.06 (t, *J* = 7.5 Hz, 1H), 7.47 (dd, *J*<sub>1</sub> = 3.5 Hz, *J*<sub>2</sub> = 5.0 Hz, 1H), 7.02 (s, 2H).

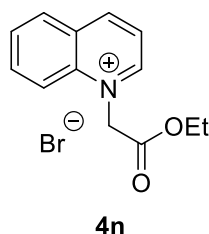

*1-(2-ethoxy-2-oxoethyl)quinolin-1-ium bromide (4n)*. Brown solid, 1154 mg, 78% yield. M.p. 164–166 °C. General procedures for synthesis of the salts **4** was followed. The NMR data is identical to that reported in literature.<sup>[5]</sup> <sup>1</sup>H NMR (500 MHz,

DMSO-*d*<sub>6</sub>)  $\delta$  9.64 – 9.62 (m, 1H), 9.46 (d,  $J$  = 8.5 Hz, 1H), 8.55 (dd,  $J_1$  = 1.0 Hz,  $J_2$  = 8.5 Hz, 1H), 8.46 (d,  $J$  = 9.0 Hz, 1H), 8.33 – 8.27 (m, 2H), 8.09 – 8.06 (m, 1H), 6.22 (s, 2H), 4.24 (q,  $J$  = 7.0 Hz, 2H), 1.24 (t,  $J$  = 7.0 Hz, 3H).

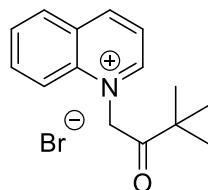

**4o**

*1-(3,3-dimethyl-2-oxobutyl)quinolin-1-ium bromide (4o)*. Gray solid, 447 mg, 29% yield. M.p. 190–192 °C. General procedures for synthesis of the salts **4** was followed. The NMR data is identical to that reported in literature.<sup>[13]</sup> **<sup>1</sup>H NMR** (500 MHz, DMSO-*d*<sub>6</sub>)  $\delta$  9.56 (d,  $J$  = 5.5 Hz, 1H), 9.42 (d,  $J$  = 8.0 Hz, 1H), 8.53 (d,  $J$  = 8.0 Hz, 1H), 8.30 (dd,  $J_1$  = 6.0 Hz,  $J_2$  = 8.0 Hz, 1H), 8.27 – 8.21 (m, 2H), 8.05 (t,  $J$  = 7.5 Hz, 1H), 6.64 (s, 2H), 1.34 (s, 9H).

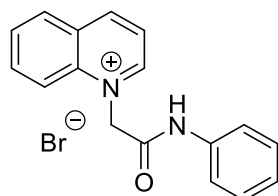

**4p**

*1-(2-oxo-2-(phenylamino)ethyl)quinolin-1-ium bromide (4p)*. White solid, 755 mg, 44% yield. M.p. 229–231 °C. General procedures for synthesis of the salts **4** was followed. **<sup>1</sup>H NMR** (500 MHz, DMSO-*d*<sub>6</sub>)  $\delta$  10.97 (s, 1H), 9.61 (dd,  $J_1$  = 1.0 Hz,  $J_2$  = 6.0 Hz, 1H), 9.42 (d,  $J$  = 8.0 Hz, 1H), 8.54 (dd,  $J_1$  = 1.5 Hz,  $J_2$  = 8.5 Hz, 1H), 8.47 (d,  $J$  = 9.0 Hz, 1H), 8.32 – 8.27 (m, 2H), 8.08 – 8.05 (m, 1H), 7.62 – 7.60 (m, 2H), 7.35 (t,  $J$  = 7.5 Hz, 2H), 7.11 (t,  $J$  = 7.5 Hz, 1H), 6.13 (s, 2H). **<sup>13</sup>C NMR** (126 MHz, DMSO-*d*<sub>6</sub>)  $\delta$  162.7, 151.3, 148.5, 138.4, 138.0, 136.0, 130.7, 129.9, 129.3, 128.9, 124.1, 121.9, 119.3, 118.6, 59.2. **HRMS-ESI** (m/z) calcd. for [C<sub>17</sub>H<sub>15</sub>N<sub>2</sub>O]<sup>+</sup> ([M-Br]<sup>+</sup>): 263.1179, found: 263.1177.



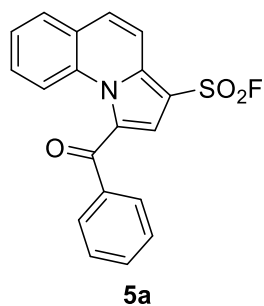

*1-benzoylpyrrolo[1,2-a]quinoline-3-sulfonyl fluoride (5a)*. White solid, 296 mg, 84% yield. M.p. 175–177 °C. Purification by column chromatography on silica gel using petroleum ether / dichloromethane (3:1 to 1:1, v/v) as eluent. <sup>1</sup>H NMR (500 MHz, CDCl<sub>3</sub>) δ 8.10 (d, *J* = 8.0 Hz, 2H), 8.04 (dd, *J*<sub>1</sub> = 5.0, *J*<sub>2</sub> = 9.0 Hz, 2H), 7.90 – 7.85 (m, 2H), 7.72 (t, *J* = 7.5 Hz, 1H), 7.66 – 7.57 (m, 5H). <sup>19</sup>F NMR (471 MHz, CDCl<sub>3</sub>) δ 72.28 (s, 1F). <sup>13</sup>C NMR (126 MHz, CDCl<sub>3</sub>) δ 184.9, 138.6, 137.3, 133.9, 132.9, 131.2, 130.3, 129.9, 129.5, 129.0, 128.9, 127.1, 126.7, 125.1, 120.3, 115.2, 105.9 (d, *J* = 30.5 Hz). HRMS-ESI (m/z) calcd. for [C<sub>19</sub>H<sub>13</sub>FNO<sub>3</sub>S]<sup>+</sup> ([M+H]<sup>+</sup>): 354.0595, found: 354.0603.

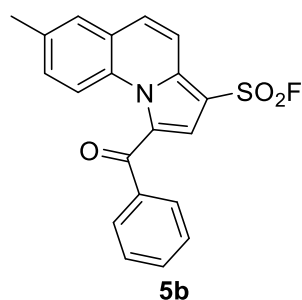

*1-benzoyl-7-methylpyrrolo[1,2-a]quinoline-3-sulfonyl fluoride (5b)*. Yellow solid, 290 mg, 79% yield. M.p. 202–203 °C. Purification by column chromatography on silica gel using petroleum ether / dichloromethane (3:1 to 1:1, v/v) as eluent. <sup>1</sup>H NMR (500 MHz, CDCl<sub>3</sub>) δ 8.10 (d, *J* = 7.5 Hz, 2H), 7.99 (d, *J* = 9.5 Hz, 1H), 7.93 (d, *J* = 9.0 Hz, 1H), 7.79 (d, *J* = 9.0 Hz, 1H), 7.71 (t, *J* = 7.5 Hz, 1H), 7.66 (s, 1H), 7.60 – 7.58 (m, 3H), 7.45 (d, *J* = 9.0 Hz, 1H), 2.52 (s, 3H). <sup>19</sup>F NMR (471 MHz, CDCl<sub>3</sub>) δ 72.25 (s, 1F). <sup>13</sup>C NMR (126 MHz, CDCl<sub>3</sub>) δ 184.9, 138.3, 137.4, 136.7, 133.8, 131.3, 131.1, 131.0, 130.3, 128.9, 128.9, 128.6, 127.2, 125.1, 120.1, 115.0, 105.5 (d, *J* = 30.2 Hz), 21.1. HRMS-ESI (m/z) calcd. for [C<sub>20</sub>H<sub>15</sub>FNO<sub>3</sub>S]<sup>+</sup> ([M+H]<sup>+</sup>): 368.0751, found: 368.0750.

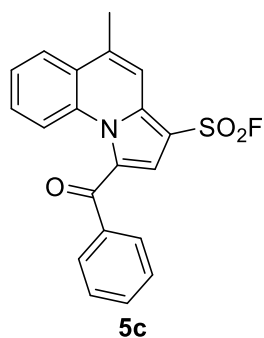

*1-benzoyl-5-methylpyrrolo[1,2-a]quinoline-3-sulfonyl fluoride (5c)*. Yellow solid, 135 mg, 37% yield. M.p. 207–208 °C. Purification by column chromatography on silica gel using petroleum ether / dichloromethane (3:1 to 1:1, v/v) as eluent.  $^1\text{H NMR}$  (500 MHz,  $\text{CDCl}_3$ )  $\delta$  8.10 – 8.06 (m, 3H), 8.03 (d,  $J = 7.5$  Hz, 1H), 7.87 (s, 1H), 7.71 (t,  $J = 7.5$  Hz, 1H), 7.66 – 7.57 (m, 5H), 2.76 (s, 3H).  $^{19}\text{F NMR}$  (471 MHz,  $\text{CDCl}_3$ )  $\delta$  72.08 (s, 1F).  $^{13}\text{C NMR}$  (126 MHz,  $\text{CDCl}_3$ )  $\delta$  184.7, 139.3, 138.7, 137.4, 133.8, 132.7, 130.2, 129.5, 128.9, 128.6, 127.7, 126.6, 125.7, 125.3, 120.7, 114.8, 104.5 (d,  $J = 30.0$  Hz), 19.8. **HRMS-ESI** ( $m/z$ ) calcd. for  $[\text{C}_{20}\text{H}_{15}\text{FNO}_3\text{S}]^+$  ( $[\text{M}+\text{H}]^+$ ): 368.0751, found: 368.0757.

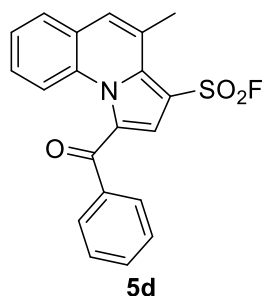

*1-benzoyl-4-methylpyrrolo[1,2-a]quinoline-3-sulfonyl fluoride (5d)*. Yellow solid, 338 mg, 92% yield. M.p. 205–207 °C. Purification by column chromatography on silica gel using petroleum ether / dichloromethane (3:1 to 1:1, v/v) as eluent.  $^1\text{H NMR}$  (500 MHz,  $\text{CDCl}_3$ )  $\delta$  8.11 (d,  $J = 5.0$  Hz, 2H), 7.88 (d,  $J = 6.5$  Hz, 1H), 7.79 (d,  $J = 4.5$  Hz, 1H), 7.72 (s, 2H), 7.63 – 7.54 (m, 5H), 2.86 (s, 3H).  $^{19}\text{F NMR}$  (471 MHz,  $\text{CDCl}_3$ )  $\delta$  73.81 (s, 1F).  $^{13}\text{C NMR}$  (126 MHz,  $\text{CDCl}_3$ )  $\delta$  184.8, 137.7, 137.2, 133.9, 131.6, 131.3, 130.3, 129.8, 129.0, 128.9, 128.3, 127.6, 126.6, 125.8, 125.1, 120.3, 107.7 (d,  $J = 32.5$  Hz), 20.3 (d,  $J = 3.4$  Hz). **HRMS-ESI** ( $m/z$ ) calcd. for  $[\text{C}_{20}\text{H}_{15}\text{FNO}_3\text{S}]^+$  ( $[\text{M}+\text{H}]^+$ ): 368.0751,

found: 368.0756.

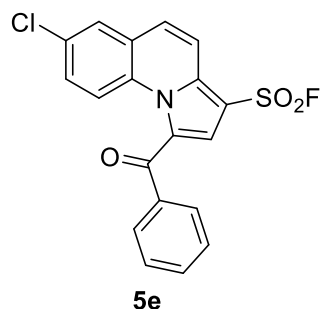

*1-benzoyl-7-chloropyrrolo[1,2-a]quinoline-3-sulfonyl fluoride (5e)*. White solid, 340 mg, 88% yield. M.p. 188–190 °C. Purification by column chromatography on silica gel using petroleum ether / dichloromethane (3:1 to 1:1, v/v) as eluent.  $^1\text{H NMR}$  (500 MHz,  $\text{CDCl}_3$ )  $\delta$  8.09 – 8.02 (m, 4H), 7.84 (s, 1H), 7.73 (s, 2H), 7.62 – 7.56 (m, 4H).  $^{19}\text{F NMR}$  (471 MHz,  $\text{CDCl}_3$ )  $\delta$  72.42 (s, 1F).  $^{13}\text{C NMR}$  (126 MHz,  $\text{CDCl}_3$ )  $\delta$  184.9, 138.2, 137.2, 134.1, 132.4, 131.3, 130.3, 130.0, 129.9, 129.0, 129.0, 128.3, 127.3, 126.2, 121.9, 116.5, 106.6 (d,  $J = 30.9$  Hz). **HRMS-ESI** (m/z) calcd. for  $[\text{C}_{19}\text{H}_{12}\text{ClFNO}_3\text{S}]^+$  ( $[\text{M}+\text{H}]^+$ ): 388.0205, found: 388.0210.

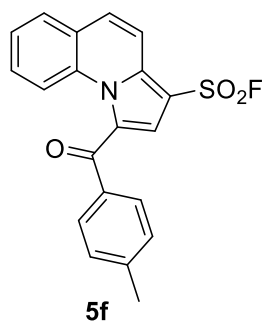

*1-(4-methylbenzoyl)pyrrolo[1,2-a]quinoline-3-sulfonyl fluoride (5f)*. Yellow solid, 297 mg, 81% yield. M.p. 187–189 °C. Purification by column chromatography on silica gel using petroleum ether / dichloromethane (3:1 to 1:1, v/v) as eluent.  $^1\text{H NMR}$  (500 MHz,  $\text{CDCl}_3$ )  $\delta$  8.01 (s, 4H), 7.87 – 7.83 (m, 2H), 7.60 – 7.56 (m, 3H), 7.39 (s, 2H), 2.51 (s, 3H).  $^{19}\text{F NMR}$  (471 MHz,  $\text{CDCl}_3$ )  $\delta$  72.35 (s, 1F).  $^{13}\text{C NMR}$  (126 MHz,  $\text{CDCl}_3$ )  $\delta$  184.8, 145.1, 138.3, 134.6, 132.8, 130.9, 130.5, 129.8, 129.7, 129.4, 128.9, 126.6, 126.5, 125.0, 120.2, 115.2, 105.6 (d,  $J = 30.1$  Hz), 21.9. **HRMS-ESI** (m/z) calcd. for  $[\text{C}_{20}\text{H}_{15}\text{FNO}_3\text{S}]^+$  ( $[\text{M}+\text{H}]^+$ ): 368.0751, found: 368.0754.

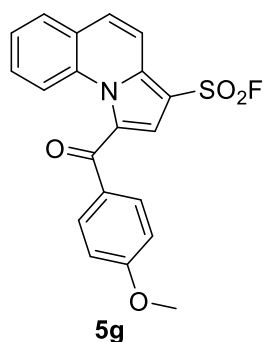

*1-(4-methoxybenzoyl)pyrrolo[1,2-a]quinoline-3-sulfonyl fluoride (5g)*. White solid, 295 mg, 77% yield. M.p. 204–205 °C. Purification by column chromatography on silica gel using petroleum ether / dichloromethane (3:1 to 1:1, v/v) as eluent. <sup>1</sup>H NMR (500 MHz, CDCl<sub>3</sub>) δ 8.11 (d, *J* = 8.5 Hz, 2H), 8.04 – 7.98 (m, 2H), 7.88 (d, *J* = 7.5 Hz, 1H), 7.82 (d, *J* = 9.0 Hz, 1H), 7.62 (t, *J* = 7.8 Hz, 1H), 7.58 – 7.55 (m, 2H), 7.07 (d, *J* = 8.5 Hz, 2H), 3.95 (s, 3H). <sup>19</sup>F NMR (471 MHz, CDCl<sub>3</sub>) δ 72.39 (s, 1F). <sup>13</sup>C NMR (126 MHz, CDCl<sub>3</sub>) δ 184.1, 164.5, 138.1, 132.9, 132.8, 130.7, 129.9, 129.8, 129.5, 128.8, 126.6, 125.7, 125.0, 120.1, 115.3, 114.3, 105.5 (d, *J* = 30.2 Hz), 55.8. HRMS-ESI (*m/z*) calcd. for [C<sub>20</sub>H<sub>15</sub>FNO<sub>4</sub>S]<sup>+</sup> ([M+H]<sup>+</sup>): 384.0700, found: 384.0709.

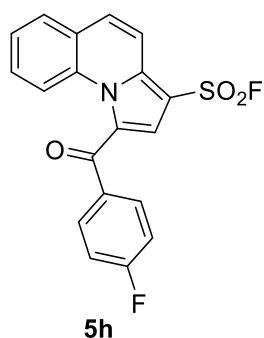

*1-(4-fluorobenzoyl)pyrrolo[1,2-a]quinoline-3-sulfonyl fluoride (5h)*. Yellow solid, 330 mg, 89% yield. M.p. 201–203 °C. Purification by column chromatography on silica gel using petroleum ether / dichloromethane (3:1 to 1:1, v/v) as eluent. <sup>1</sup>H NMR (500 MHz, CDCl<sub>3</sub>) δ 8.16 – 8.13 (m, 2H), 8.04 (d, *J* = 9.5 Hz, 2H), 8.00 (d, *J* = 8.5 Hz, 2H), 7.90 (d, *J* = 7.5 Hz, 2H), 7.87 (d, *J* = 9.5 Hz, 2H), 7.67 – 7.64 (m, 1H), 7.61 – 7.58 (m, 2H), 7.28 (t, *J* = 8.5 Hz, 2H). <sup>19</sup>F NMR (471 MHz, CDCl<sub>3</sub>) δ 72.27 (s, 1F), –103.46 –

-103.52 (m, 1F).  $^{13}\text{C}$  NMR (126 MHz,  $\text{CDCl}_3$ )  $\delta$  183.5, 166.4 (d,  $J = 257.0$  Hz), 138.6, 133.6 (d,  $J = 3.0$  Hz), 133.0 (d,  $J = 9.5$  Hz), 132.8, 131.3, 130.0, 129.6, 128.5, 126.9, 126.8, 125.1, 120.2, 116.3 (d,  $J = 22.2$  Hz), 115.2, 106.0 (d,  $J = 30.5$  Hz). **HRMS-ESI** ( $m/z$ ) calcd. for  $[\text{C}_{19}\text{H}_{12}\text{F}_2\text{NO}_3\text{S}]^+$  ( $[\text{M}+\text{H}]^+$ ): 372.0500, found: 372.0509.

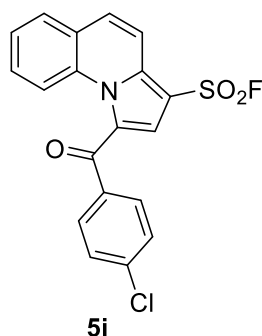

*1-(4-chlorobenzoyl)pyrrolo[1,2-a]quinoline-3-sulfonyl fluoride (5i)*. Light yellow solid, 325 mg, 84% yield. M.p. 186–187 °C. Purification by column chromatography on silica gel using petroleum ether / dichloromethane (3:1 to 1:1, v/v) as eluent.  $^1\text{H}$  NMR (500 MHz,  $\text{CDCl}_3$ )  $\delta$  8.06 – 8.00 (m, 4H), 7.91 – 7.87 (m, 2H), 7.66 (t,  $J = 7.3$  Hz, 1H), 7.61 – 7.57 (m, 4H).  $^{19}\text{F}$  NMR (471 MHz,  $\text{CDCl}_3$ )  $\delta$  72.24 (s, 1F).  $^{13}\text{C}$  NMR (126 MHz,  $\text{CDCl}_3$ )  $\delta$  183.6, 140.6, 138.7, 135.7, 132.9, 131.6, 131.4, 130.0, 129.6, 129.4, 128.4, 127.2, 126.8, 125.1, 120.2, 115.2, 106.1 (d,  $J = 30.6$  Hz). **HRMS-ESI** ( $m/z$ ) calcd. for  $[\text{C}_{19}\text{H}_{12}\text{ClFNO}_3\text{S}]^+$  ( $[\text{M}+\text{H}]^+$ ): 388.0205, found: 388.0209.

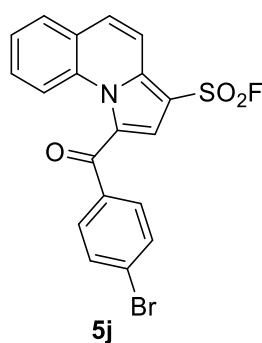

*1-(4-bromobenzoyl)pyrrolo[1,2-a]quinoline-3-sulfonyl fluoride (5j)*. Yellow solid, 397 mg, 92% yield. M.p. 203–204 °C. Purification by column chromatography on silica gel using petroleum ether / dichloromethane (3:1 to 1:1, v/v) as eluent.  $^1\text{H}$  NMR (500 MHz,

CDCl<sub>3</sub>)  $\delta$  8.04 – 8.00 (m, 2H), 7.97 (d,  $J$  = 8.5 Hz, 2H), 7.91 – 7.87 (m, 2H), 7.74 (d,  $J$  = 8.5 Hz, 2H), 7.66 (t,  $J$  = 7.3 Hz, 1H), 7.61 – 7.58 (m, 2H). <sup>19</sup>F NMR (471 MHz, CDCl<sub>3</sub>)  $\delta$  72.24 (s, 1F). <sup>13</sup>C NMR (126 MHz, CDCl<sub>3</sub>)  $\delta$  183.7, 138.7, 136.1, 132.8, 132.3, 131.7, 131.4, 130.0, 129.6, 129.2, 128.4, 127.2, 126.8, 125.1, 120.2, 115.2, 106.1 (d,  $J$  = 30.6 Hz). HRMS-ESI (m/z) calcd. for [C<sub>19</sub>H<sub>12</sub>BrFNO<sub>3</sub>S]<sup>+</sup> ([M+H]<sup>+</sup>): 431.9700, found: 431.9707.

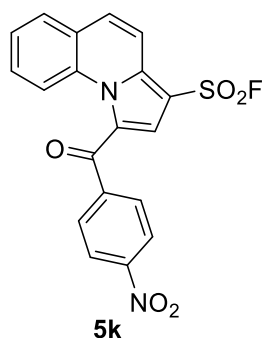

*1-(4-nitrobenzoyl)pyrrolo[1,2-a]quinoline-3-sulfonyl fluoride (5k)*. Yellow solid, 358 mg, 90% yield. M.p. 224–225 °C. Purification by column chromatography on silica gel using petroleum ether / dichloromethane (3:1 to 1:1, v/v) as eluent. <sup>1</sup>H NMR (500 MHz, DMSO-*d*<sub>6</sub>)  $\delta$  8.43 (s, 2H), 8.29 (s, 3H), 8.15 (s, 1H), 8.04 – 8.00 (m, 2H), 7.86 (s, 1H), 7.76 – 7.71 (m, 2H). <sup>19</sup>F NMR (471 MHz, DMSO-*d*<sub>6</sub>)  $\delta$  72.82 (s, 1F). <sup>13</sup>C NMR (126 MHz, DMSO-*d*<sub>6</sub>)  $\delta$  182.5, 150.2, 142.0, 138.3, 132.6, 132.0, 131.4, 130.0, 129.6, 128.5, 127.6, 126.9, 124.6, 123.8, 120.6, 114.2, 104.3 (d,  $J$  = 28.6 Hz). HRMS-ESI (m/z) calcd. for [C<sub>19</sub>H<sub>12</sub>FN<sub>2</sub>O<sub>5</sub>S]<sup>+</sup> ([M+H]<sup>+</sup>): 399.0445, found: 399.0449.

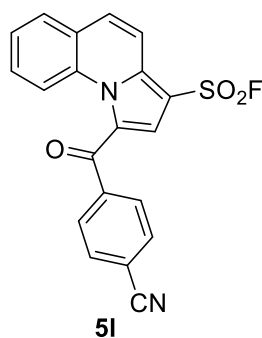

*1-(4-cyanobenzoyl)pyrrolo[1,2-a]quinoline-3-sulfonyl fluoride (5l)*. Yellow solid, 336

mg, 89% yield. M.p. 220–222 °C. Purification by column chromatography on silica gel using petroleum ether / dichloromethane (3:1 to 1:1, v/v) as eluent. **<sup>1</sup>H NMR** (500 MHz, CDCl<sub>3</sub>) δ 8.18 (d, *J* = 8.0 Hz, 2H), 8.04 (d, *J* = 6.5 Hz, 2H), 7.93 – 7.89 (m, 4H), 7.69 (t, *J* = 7.3 Hz, 1H), 7.64 – 7.61 (m, 2H). **<sup>19</sup>F NMR** (471 MHz, CDCl<sub>3</sub>) δ 72.13 (s, 1F). **<sup>13</sup>C NMR** (126 MHz, CDCl<sub>3</sub>) δ 182.7, 140.9, 139.2, 132.9, 132.8, 132.0, 130.5, 130.1, 129.7, 128.3, 128.1, 127.0, 125.2, 120.3, 117.9, 117.0, 115.1, 106.6 (d, *J* = 30.9 Hz). **HRMS-ESI** (m/z) calcd. for [C<sub>20</sub>H<sub>12</sub>FN<sub>2</sub>O<sub>3</sub>S]<sup>+</sup> ([M+H]<sup>+</sup>): 379.0547, found: 379.0537.

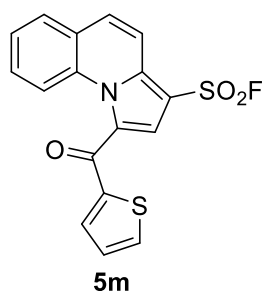

*1-(thiophene-2-carbonyl)pyrrolo[1,2-a]quinoline-3-sulfonyl fluoride (5m)*. White solid, 302 mg, 84% yield. M.p. 180–181 °C. Purification by column chromatography on silica gel using petroleum ether / dichloromethane (3:1 to 1:1, v/v) as eluent. **<sup>1</sup>H NMR** (500 MHz, CDCl<sub>3</sub>) δ 7.99 – 7.79 (m, 8H), 7.62 (s, 1H), 7.55 (s, 1H). **<sup>19</sup>F NMR** (471 MHz, CDCl<sub>3</sub>) δ 72.42 (s, 1F). **<sup>13</sup>C NMR** (126 MHz, CDCl<sub>3</sub>) δ 177.2, 143.6, 138.3, 135.8, 135.3, 132.7, 130.9, 130.0, 129.5, 128.6, 128.0, 126.6, 125.8, 125.0, 120.0, 115.2, 105.7 (d, *J* = 30.2 Hz). **HRMS-ESI** (m/z) calcd. for [C<sub>17</sub>H<sub>11</sub>FNO<sub>3</sub>S<sub>2</sub>]<sup>+</sup> ([M+H]<sup>+</sup>): 360.0159, found: 360.0149.

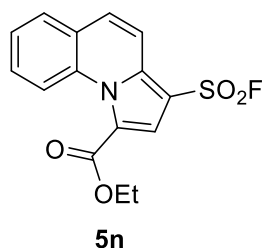

*Ethyl 3-(fluorosulfonyl)pyrrolo[1,2-a]quinoline-1-carboxylate (5n)*. White solid, 167 mg, 52% yield. M.p. 123–125 °C. Purification by column chromatography on silica gel

using petroleum ether / dichloromethane (3:1 to 1:1, v/v) as eluent.  $^1\text{H NMR}$  (500 MHz,  $\text{CDCl}_3$ )  $\delta$  8.44 (d,  $J = 8.5$  Hz, 1H), 7.98 (d,  $J = 10.0$  Hz, 2H), 7.84 (d,  $J = 7.5$  Hz, 1H), 7.75 (d,  $J = 9.0$  Hz, 1H), 7.69 (t,  $J = 7.3$  Hz, 1H), 7.58 (t,  $J = 7.5$  Hz, 1H), 4.48 (q,  $J = 7.2$  Hz, 2H), 1.47 (t,  $J = 7.3$  Hz, 3H).  $^{19}\text{F NMR}$  (471 MHz,  $\text{CDCl}_3$ )  $\delta$  72.19 (s, 1F).  $^{13}\text{C NMR}$  (126 MHz,  $\text{CDCl}_3$ )  $\delta$  161.0, 137.9, 133.2, 130.2, 129.5, 129.2, 126.7, 125.3, 125.2, 121.8, 120.4, 115.3, 105.8 (d,  $J = 30.4$  Hz), 62.0, 14.5. **HRMS-ESI** (m/z) calcd. for  $[\text{C}_{15}\text{H}_{13}\text{FNO}_4\text{S}]^+$  ( $[\text{M}+\text{H}]^+$ ): 322.0544, found: 322.0536.

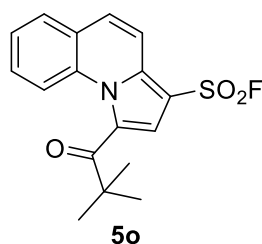

*1-(pivaloyl)pyrrolo[1,2-a]quinoline-3-sulfonyl fluoride (5o)*. Light yellow solid, 150 mg, 45% yield. M.p. 135–137 °C. Purification by column chromatography on silica gel using petroleum ether / dichloromethane (3:1 to 1:1, v/v) as eluent.  $^1\text{H NMR}$  (500 MHz,  $\text{CDCl}_3$ )  $\delta$  7.98 (d,  $J = 9.5$  Hz, 1H), 7.85 (d,  $J = 8.0$  Hz, 1H), 7.74 (d,  $J = 9.5$  Hz, 1H), 7.67 (s, 1H), 7.65 – 7.59 (m, 2H), 7.55 (t,  $J = 7.3$  Hz, 1H), 1.53 (s, 9H).  $^{19}\text{F NMR}$  (471 MHz,  $\text{CDCl}_3$ )  $\delta$  72.51 (s, 1F).  $^{13}\text{C NMR}$  (126 MHz,  $\text{CDCl}_3$ )  $\delta$  201.3, 137.1, 132.9, 130.0, 129.7, 129.7, 127.9, 126.3, 125.0, 120.3, 119.1, 115.3, 105.0 (d,  $J = 29.9$  Hz), 45.2, 28.4. **HRMS-ESI** (m/z) calcd. for  $[\text{C}_{17}\text{H}_{17}\text{FNO}_3\text{S}]^+$  ( $[\text{M}+\text{H}]^+$ ): 334.0908, found: 334.0903.

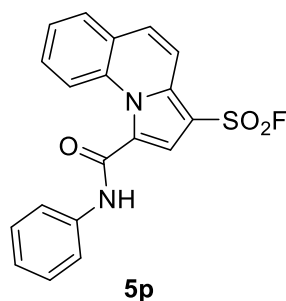

*1-(phenylcarbamoyl)pyrrolo[1,2-a]quinoline-3-sulfonyl fluoride (5p)*. White solid, 151 mg, 41% yield. M.p. 260–262 °C. Purification by column chromatography on silica gel using petroleum ether / dichloromethane (3:1 to 1:1, v/v) as eluent.  $^1\text{H NMR}$  (500 MHz,



DMSO-*d*<sub>6</sub>)  $\delta$  11.06 (s, 1H), 8.16 (d, *J* = 8.5 Hz, 1H), 8.09 (d, *J* = 8.0 Hz, 1H), 8.06 (d, *J* = 9.5 Hz, 1H), 7.94 (d, *J* = 8.0 Hz, 2H), 7.82 (d, *J* = 8.0 Hz, 2H), 7.77 (t, *J* = 7.5 Hz, 1H), 7.65 (t, *J* = 7.5 Hz, 1H), 7.42 (t, *J* = 7.8 Hz, 2H), 7.18 (t, *J* = 7.5 Hz, 1H). <sup>19</sup>F NMR (471 MHz, DMSO-*d*<sub>6</sub>)  $\delta$  73.61 (s, 1F). <sup>13</sup>C NMR (126 MHz, CDCl<sub>3</sub>)  $\delta$  159.5, 138.6, 135.3, 132.0, 130.0, 129.8, 129.6, 128.9, 126.5, 126.0, 124.3, 124.3, 120.2, 118.8, 118.5, 114.4, 102.5 (d, *J* = 28.7 Hz). HRMS-ESI (*m/z*) calcd. for [C<sub>19</sub>H<sub>14</sub>FN<sub>2</sub>O<sub>3</sub>S]<sup>+</sup> ([M+H]<sup>+</sup>): 369.0704, found: 369.0693.

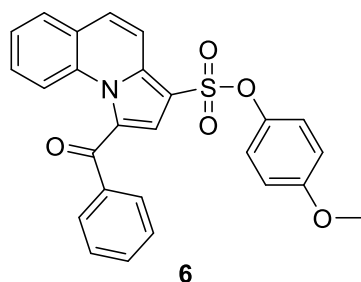

*4*-methoxyphenyl 1-benzoylpyrrolo[1,2-*a*]quinoline-3-sulfonate (**6**). Yellow solid, 226 mg, 99% yield. M.p. 63–65 °C. Purification by column chromatography on silica gel using dichloromethane as eluent. <sup>1</sup>H NMR (500 MHz, CDCl<sub>3</sub>)  $\delta$  8.06 – 8.00 (m, 3H), 7.83 (s, 2H), 7.69 – 7.65 (m, 2H), 7.60 – 7.54 (m, 4H), 7.38 (s, 1H), 6.93 (d, *J* = 7.0 Hz, 2H), 6.74 (d, *J* = 7.5 Hz, 2H), 3.74 (s, 3H). <sup>13</sup>C NMR (126 MHz, CDCl<sub>3</sub>)  $\delta$  184.9, 158.4, 143.1, 138.0, 137.6, 133.6, 132.9, 130.2, 130.0, 129.4, 129.3, 128.7, 128.1, 127.9, 126.3, 125.0, 123.5, 120.2, 115.6, 114.6, 108.8, 55.6. HRMS-ESI (*m/z*) calcd. for [C<sub>26</sub>H<sub>20</sub>NO<sub>5</sub>S]<sup>+</sup> ([M+H]<sup>+</sup>): 458.1057, found: 458.1050.

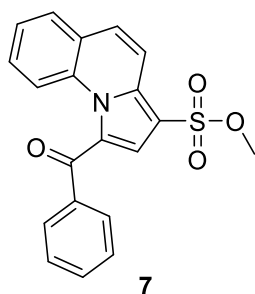

Methyl 1-benzoylpyrrolo[1,2-*a*]quinoline-3-sulfonate (**7**). Yellow solid, 170 mg, 93% yield. M.p. 153–154 °C. Purification by column chromatography on silica gel using

dichloromethane as eluent. **<sup>1</sup>H NMR** (500 MHz, CDCl<sub>3</sub>) δ 8.10 – 8.00 (m, 4H), 7.85 (d, *J* = 4.5 Hz, 1H), 7.76 (d, *J* = 8.0 Hz, 1H), 7.69 (t, *J* = 7.5 Hz, 1H), 7.62 – 7.52 (m, 5H), 3.77 (s, 3H). **<sup>13</sup>C NMR** (126 MHz, CDCl<sub>3</sub>) δ 184.9, 137.8, 137.7, 133.6, 132.9, 130.3, 130.0, 129.4, 129.3, 128.8, 128.2, 127.7, 126.3, 125.0, 120.3, 115.7, 108.9, 56.3. **HRMS-ESI** (*m/z*) calcd. for [C<sub>20</sub>H<sub>16</sub>NO<sub>4</sub>S]<sup>+</sup> ([M+H]<sup>+</sup>):366.0795, found: 366.0798.

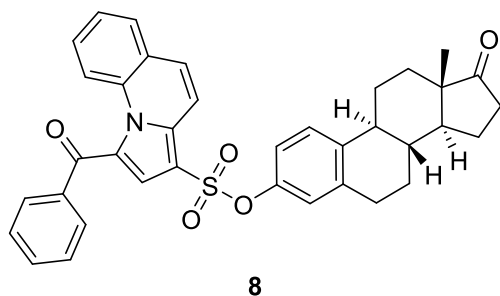

*(8R,9S,13S,14S)*-13-methyl-17-oxo-7,8,9,11,12,13,14,15,16,17-decahydro-6H-cyclopenta[*a*]phenanthren-3-yl 1-benzoylpyrrolo[1,2-*a*]quinoline-3-sulfonate (**8**). Yellow solid, 66 mg, 55% yield. M.p. 202–203 °C. Purification by column chromatography on silica gel using ether/ dichloromethane (1:1, v/v) as eluent. **<sup>1</sup>H NMR** (500 MHz, CDCl<sub>3</sub>) δ 9.66 (d, *J* = 7.5 Hz, 1H), 9.34 (d, *J* = 8.5 Hz, 1H), 7.88 – 7.86 (m, 1H), 7.81 – 7.74 (m, 4H), 7.66 (s, 1H), 7.61 – 7.57 (m, 1H), 7.49 (t, *J* = 7.5 Hz, 2H), 7.41 (d, *J* = 7.5 Hz, 1H), 7.08 (d, *J* = 8.5 Hz, 1H), 6.82 (d, *J* = 2.5 Hz, 1H), 6.67 (dd, *J*<sub>1</sub> = 2.5 Hz, *J*<sub>2</sub> = 8.5 Hz, 1H), 2.78 – 2.74 (m, 2H), 2.48 (dd, *J*<sub>1</sub> = 4.0 Hz, *J*<sub>2</sub> = 19.0 Hz, 1H), 2.31 – 2.26 (m, 1H), 2.20 – 2.08 (m, 2H), 2.04 – 1.99 (m, 1H), 1.97 – 1.90 (m, 2H), 1.63 – 1.41 (m, 5H), 1.40 – 1.32 (m, 1H), 0.86 (s, 3H). **<sup>13</sup>C NMR** (126 MHz, CDCl<sub>3</sub>) δ 220.5, 185.9, 147.8, 139.1, 138.9, 138.6, 134.1, 132.4, 130.7, 130.2, 130.0, 129.4, 129.1, 128.7, 127.5, 127.4, 126.7, 125.1, 123.1, 123.0, 122.1, 118.9, 116.6, 111.2, 50.5, 48.0, 44.2, 37.9, 35.9, 31.6, 29.4, 26.2, 25.7, 21.7, 13.9. **HRMS-ESI** (*m/z*) calcd. for [C<sub>37</sub>H<sub>34</sub>NO<sub>5</sub>S]<sup>+</sup> ([M+H]<sup>+</sup>): 604.2152, found: 604.2160.

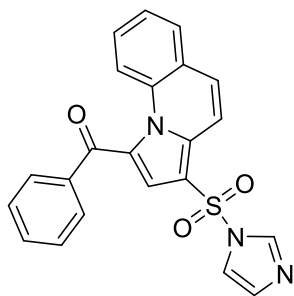

9

*(3-((1H-imidazol-1-yl)sulfonyl)pyrrolo[1,2-a]quinolin-1-yl)(phenyl)methanone* (**9**).

White solid, 184 mg, 92% yield. M.p. 207–208 °C. Purification by column chromatography on silica gel using petroleum ether/ dichloromethane (1:1 to 0:1, v/v) as eluent. <sup>1</sup>H NMR (500 MHz, CDCl<sub>3</sub>) δ 8.07 (s, 4H), 7.98 (d, *J* = 8.5 Hz, 1H), 7.87 – 7.82(m, 2H), 7.72 (s, 1H), 7.61 – 7.54 (m, 5H), 7.32 (s, 1H), 7.06 (s, 1H). <sup>13</sup>C NMR (126 MHz, CDCl<sub>3</sub>) δ 184.9, 137.6, 137.3, 136.2, 133.9, 132.8, 131.3, 131.1, 130.3, 129.9, 129.4, 129.0, 128.9, 126.6, 126.1, 125.0, 120.3, 117.1, 114.7, 111.0. HRMS-ESI (m/z) calcd. for [C<sub>22</sub>H<sub>16</sub>N<sub>3</sub>O<sub>3</sub>S]<sup>+</sup> ([M+H]<sup>+</sup>): 402.0907, found: 402.0917.

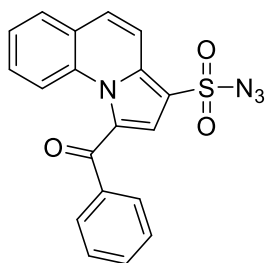

10

*1-benzoylpyrrolo[1,2-a]quinoline-3-sulfonyl azide* (**10**). Yellow solid, 152 mg, 92% yield. M.p. 165–166 °C. Purification by column chromatography on silica gel using petroleum ether/ dichloromethane (1:1, v/v) as eluent. <sup>1</sup>H NMR (500 MHz, CDCl<sub>3</sub>) δ 8.12 – 8.10 (m, 2H), 8.07 – 8.04 (m, 2H), 7.89 (dd, *J*<sub>1</sub> = 1.5 Hz, *J*<sub>2</sub> = 8.0 Hz, 1H), 7.83 (d, *J* = 9.0 Hz, 1H), 7.73 – 7.70 (t, *J* = 7.5 Hz, 1H), 7.66 – 7.63 (m, 1H), 7.61 – 7.57 (m, 4H). <sup>13</sup>C NMR (126 MHz, CDCl<sub>3</sub>) δ 185.1, 137.9, 137.5, 133.9, 132.9, 130.8, 130.4, 129.8, 129.5, 129.0, 128.5, 126.6, 125.2, 120.4, 115.4, 112.3. HRMS-ESI (m/z) calcd. for [C<sub>19</sub>H<sub>13</sub>N<sub>4</sub>O<sub>3</sub>S]<sup>+</sup> ([M+H]<sup>+</sup>): 377.0703, found: 377.0710.

Note: In the <sup>13</sup>C NMR spectrum of **10**, theoretically, there should be seventeen peaks.

Due to the compact overlaying, it is difficult to specify the overlaying peaks.

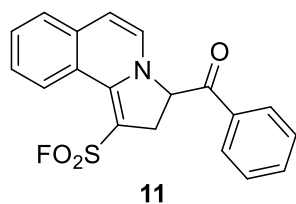

*3-benzoyl-2,3-dihydropyrrolo[2,1-a]isoquinoline-1-sulfonyl fluoride (11)*. Yellow solid, 121 mg, 17% yield. M.p. 58–60 °C. Purification by column chromatography on silica gel using petroleum ether/ dichloromethane (1:1, v/v) as eluent.  $^1\text{H NMR}$  (500 MHz,  $\text{CDCl}_3$ )  $\delta$  9.65 (d,  $J = 7.5$  Hz, 1H), 8.18 (d,  $J = 8.0$  Hz, 1H), 7.87 – 7.85 (m, 2H), 7.81 (dd,  $J_1 = 1.0$  Hz,  $J_2 = 8.0$  Hz, 1H), 7.71 – 7.67 (m, 1H), 7.65 – 7.60 (m, 2H), 7.56 – 7.52 (m, 2H), 7.17 (d,  $J = 7.0$  Hz, 1H), 5.33 (dd,  $J_1 = 3.5$  Hz,  $J_2 = 10.0$  Hz, 1H), 4.44 (dd,  $J_1 = 3.5$  Hz,  $J_2 = 16.0$  Hz, 1H), 3.82 (dd,  $J_1 = 10.5$  Hz,  $J_2 = 16.0$  Hz, 1H).  $^{19}\text{F NMR}$  (471 MHz,  $\text{CDCl}_3$ )  $\delta$  44.28 (s, 1F).  $^{13}\text{C NMR}$  (126 MHz,  $\text{CDCl}_3$ )  $\delta$  185.6, 140.3, 132.4, 131.7, 130.0, 129.3, 128.5, 128.3, 128.1 (d,  $J = 35.7$  Hz), 125.9 (d,  $J = 2.6$  Hz), 125.0, 123.3, 122.8, 114.1, 110.3, 58.0, 33.6. **HRMS-ESI** ( $m/z$ ) calcd. for  $[\text{C}_{19}\text{H}_{15}\text{FNO}_3\text{S}]^+$  ( $[\text{M}+\text{H}]^+$ ): 356.0751, found: 356.0758.

## 5. References

- [1] J. Leng and H.-L. Qin, 1-Bromoethene-1-sulfonyl fluoride (1-Br-ESF), a new SuFEx clickable reagent, and its application for regioselective construction of 5-sulfonylfluoro isoxazoles, *Chem. Commun.*, 2018, **54**, 4477-4480.
- [2] X. He, R. Li, P. Y. Choy, T. Liu, J. Wang, O. Y. Yuen, M. P. Leung, Y. Shang and F. Y. Kwong, DMAP-catalyzed annulation approach for modular assembly of furan-fused chromenes, *Org. Lett.*, 2020, **22**, 9444-9449.
- [3] Y. Chen, A. Shatskiy, J.-Q. Liu, M. D. Karkas and X.-S. Wang, Silver-Promoted (4+1) Annulation of Isocynoacetates with Alkylpyridinium Salts: Divergent Regioselective Synthesis of 1, 2-Disubstituted Indolizines, *Org. Lett.*, 2021, **23**, 7555-7560.
- [4] M. Salari, A. Hassanabadi and M. H. Mosslemin, Green synthesis of trans-2-(4-chlorobenzoyl)-5-hydroxy-3-(aryl)-2, 3-dihydrobenzofuran-4, 7-diones, *J. Chem. Res.*, 2017, **41**, 271-274.
- [5] M. Anary-Abbasinejad, K. Charkhati and A. Hassanabadi, Synthesis of benzoindolizine derivatives by reaction of trimethyl phosphite, dialkyl acetylenedicarboxylates and isoquinolinium or quinolinium bromides, *J. Chem. Res.*, 2009, **2009**, 95-97.
- [6] M. D. Hopkin, I. R. Baxendale and S. V. Ley, A new focused microwave approach to the synthesis of amino-substituted pyrroloisoquinolines and pyrroloquinolines via a sequential multi-component coupling process, *Synthesis.*, 2008, **2008**, 1688-1702.
- [7] W. Kemnitzer, J. Kuemmerle, S. Jiang, N. Sirisoma, S. Kasibhatla, C. Crogan-Grundy, B. Tseng, J. Drewe and S. X. Cai, Discovery of 1-benzoyl-3-cyanopyrrolo [1, 2-a] quinolines as a new series of apoptosis inducers using a cell-and caspase-based high-throughput screening assay. 2: structure–activity relationships of the 4-, 5-, 6-, 7-and 8-positions, *Bioorg. Med. Chem. Lett.*, 2009, **19**, 3481-3484.
- [8] V. Uppar, S. Chandrashekarappa, K. N. Venugopala, P. K. Deb, S. Kar, O. I. Alwassil, R. M. Gleiser, D. Garcia, B. Odhav and M. K. Mohan, Synthesis and characterization of pyrrolo [1, 2-a] quinoline derivatives for their larvicidal activity

- against *Anopheles arabiensis*, *Struct. Chem.*, 2020, **31**, 1533-1543.
- [9] W. Kemnitzer, J. Kuemmerle, S. Jiang, H.-Z. Zhang, N. Sirisoma, S. Kasibhatla, C. Crogan-Grundy, B. Tseng, J. Drewe and S. X. Cai, Discovery of 1-benzoyl-3-cyanopyrrolo [1, 2-a] quinolines as a new series of apoptosis inducers using a cell- and caspase-based high-throughput screening assay. Part 1: Structure–activity relationships of the 1-and 3-positions, *Bioorg. Med. Chem. Lett.*, 2008, **18**, 6259-6264.
- [10] S.-J. Chen, G.-S. Chen, T. Deng, J.-H. Li, Z.-Q. He, L.-S. Liu, H. Ren and Y.-L. Liu, Dicarbofunctionalization of Trifluoromethyl Alkenes with Pyridinium Salts via a Cycloaddition/Visible-Light-Enabled Fragmentation Cascade, *Org. Lett.*, 2022, **24**, 702-707.
- [11] M. C. Al-Matarneh, R.-M. Amārandi, I. I. Mangalagiu and R. Danac, Synthesis and biological screening of new cyano-substituted pyrrole fused (iso) quinoline derivatives, *Molecules*, 2021, **26**, 2066.
- [12] E. I. Georgescu, F. Georgescu, C. Roibu, C. C. Draghici and M. T. Caproiu, N-Bridgehead heterocyclic compounds thenoyl-substituted. I. Indolizines and benzoindolizines, *Rev. Roum. Chim.*, 2001, **46**, 357-362.
- [13] J. Grigoryan, G. Sargsyan, A. K. Gyulnazaryan, R. Paronikyan and G. Stepanyan, Synthesis and antibacterial properties of several unsaturated quaternary ammonium salts, *Pharm. Chem. J.*, 2013, **47**, 477-480.

## 6. NMR spectra

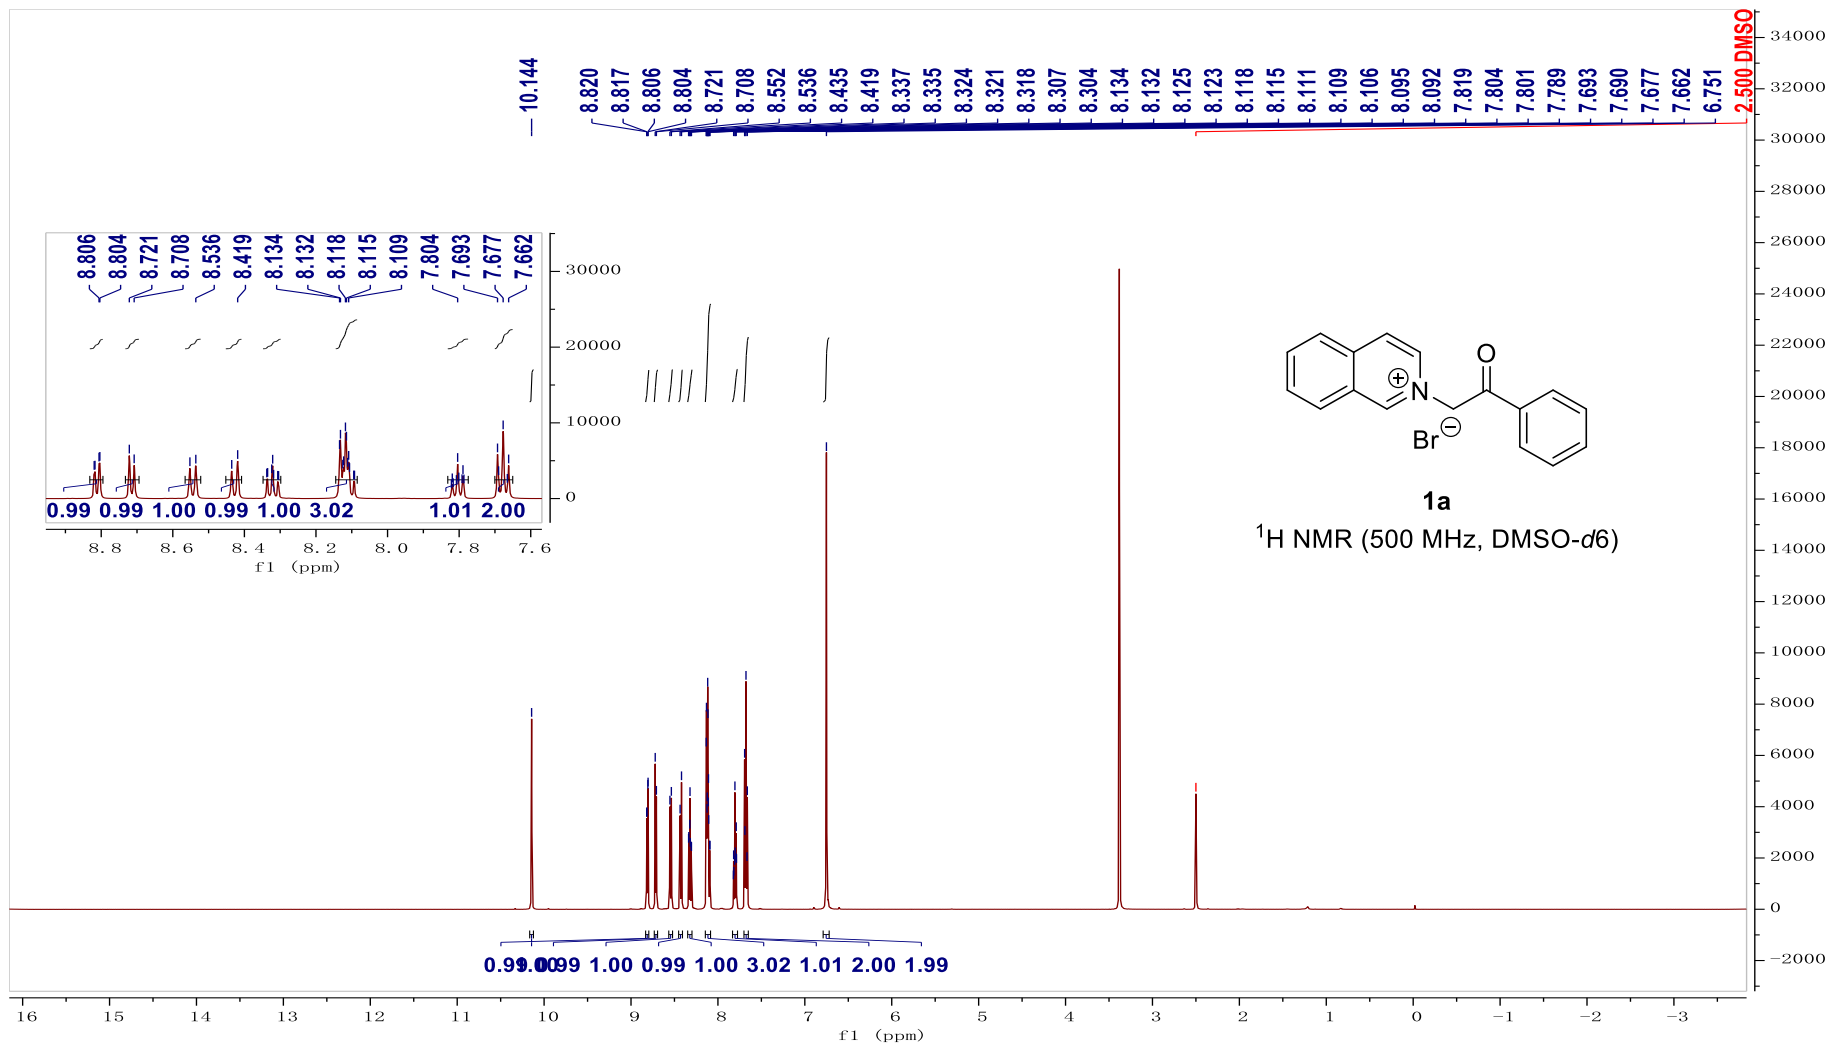

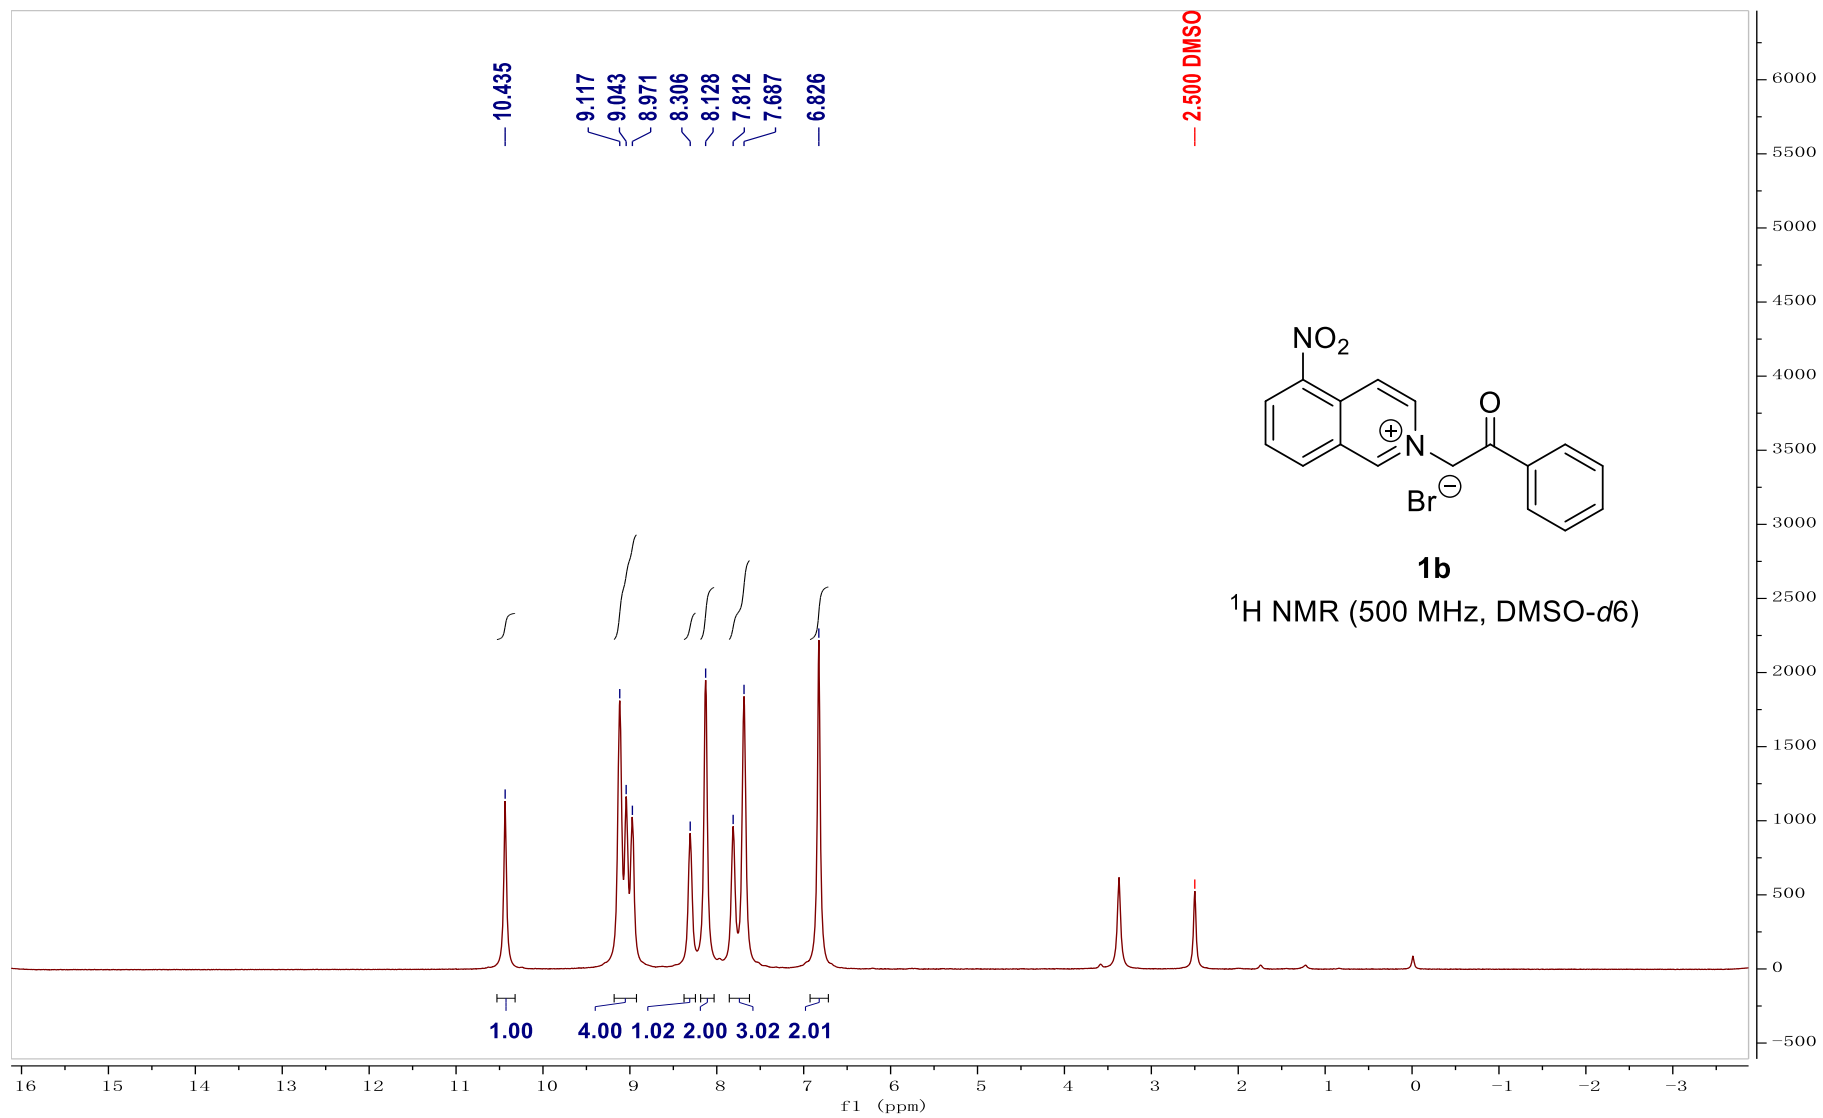



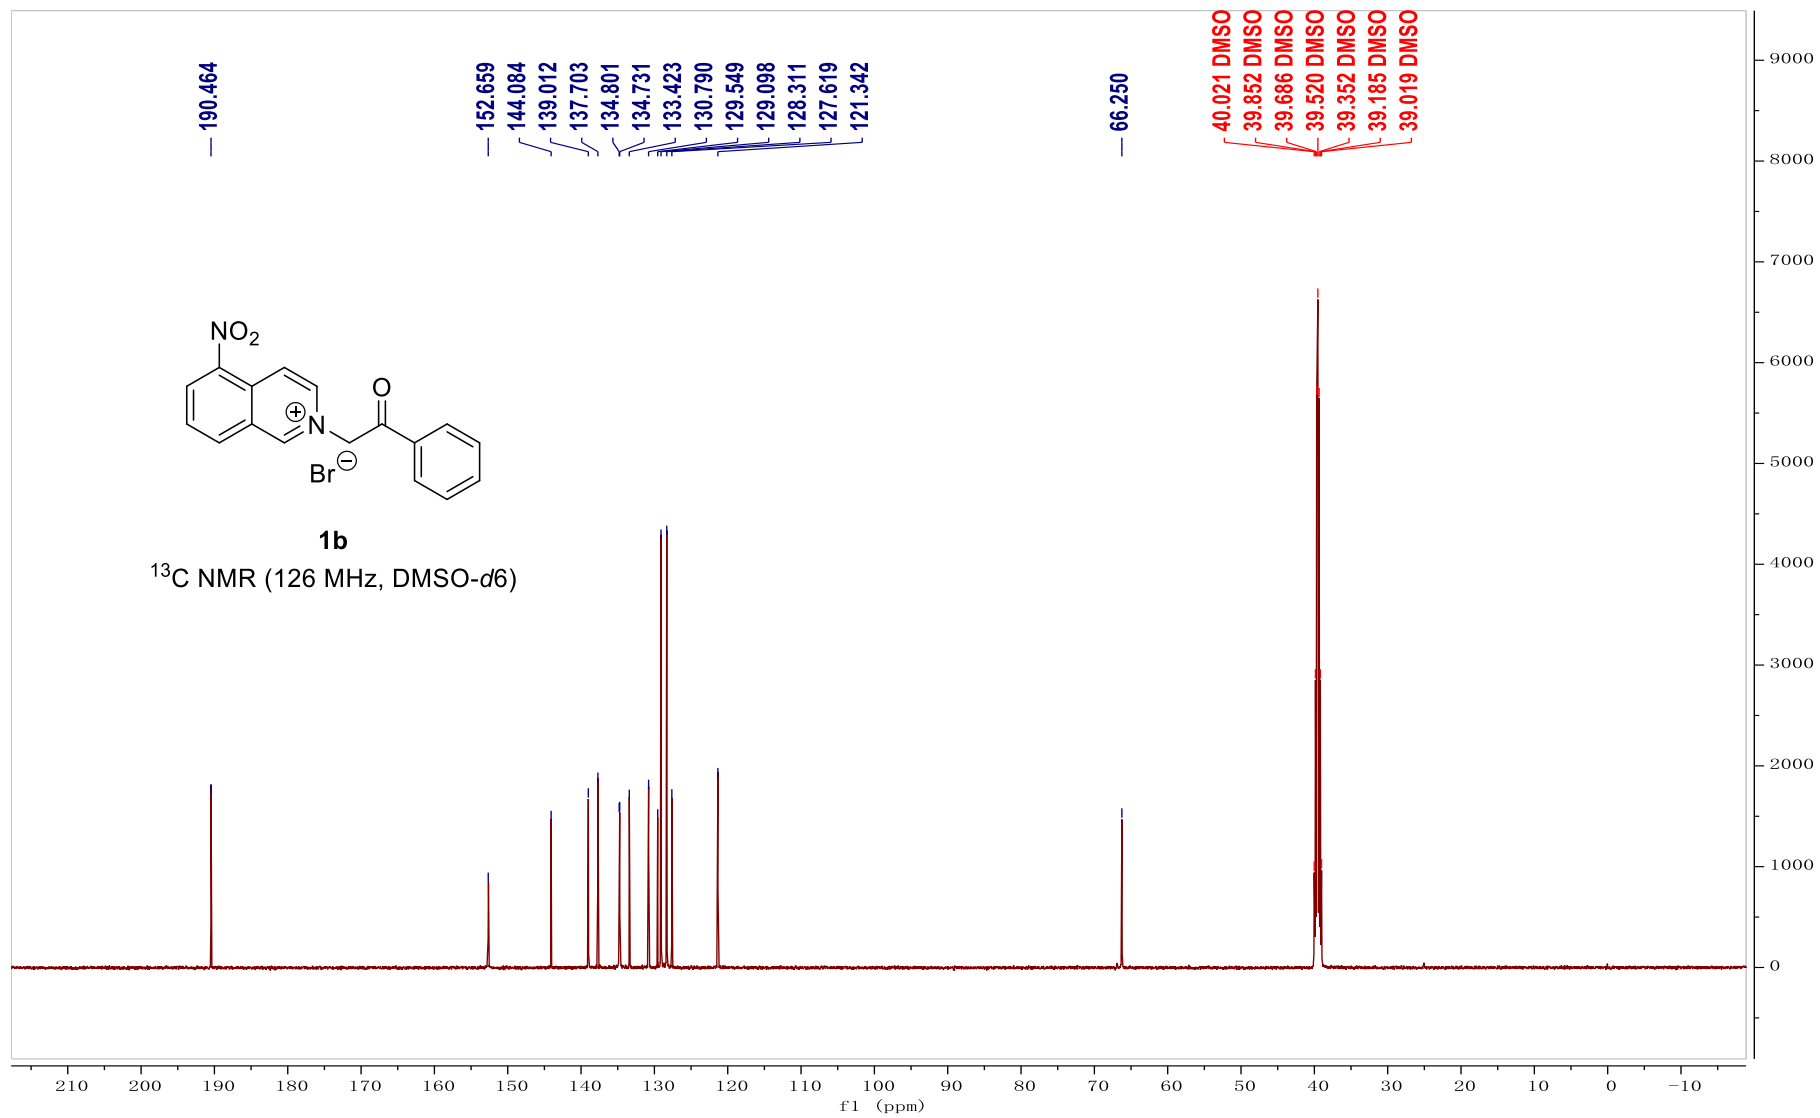

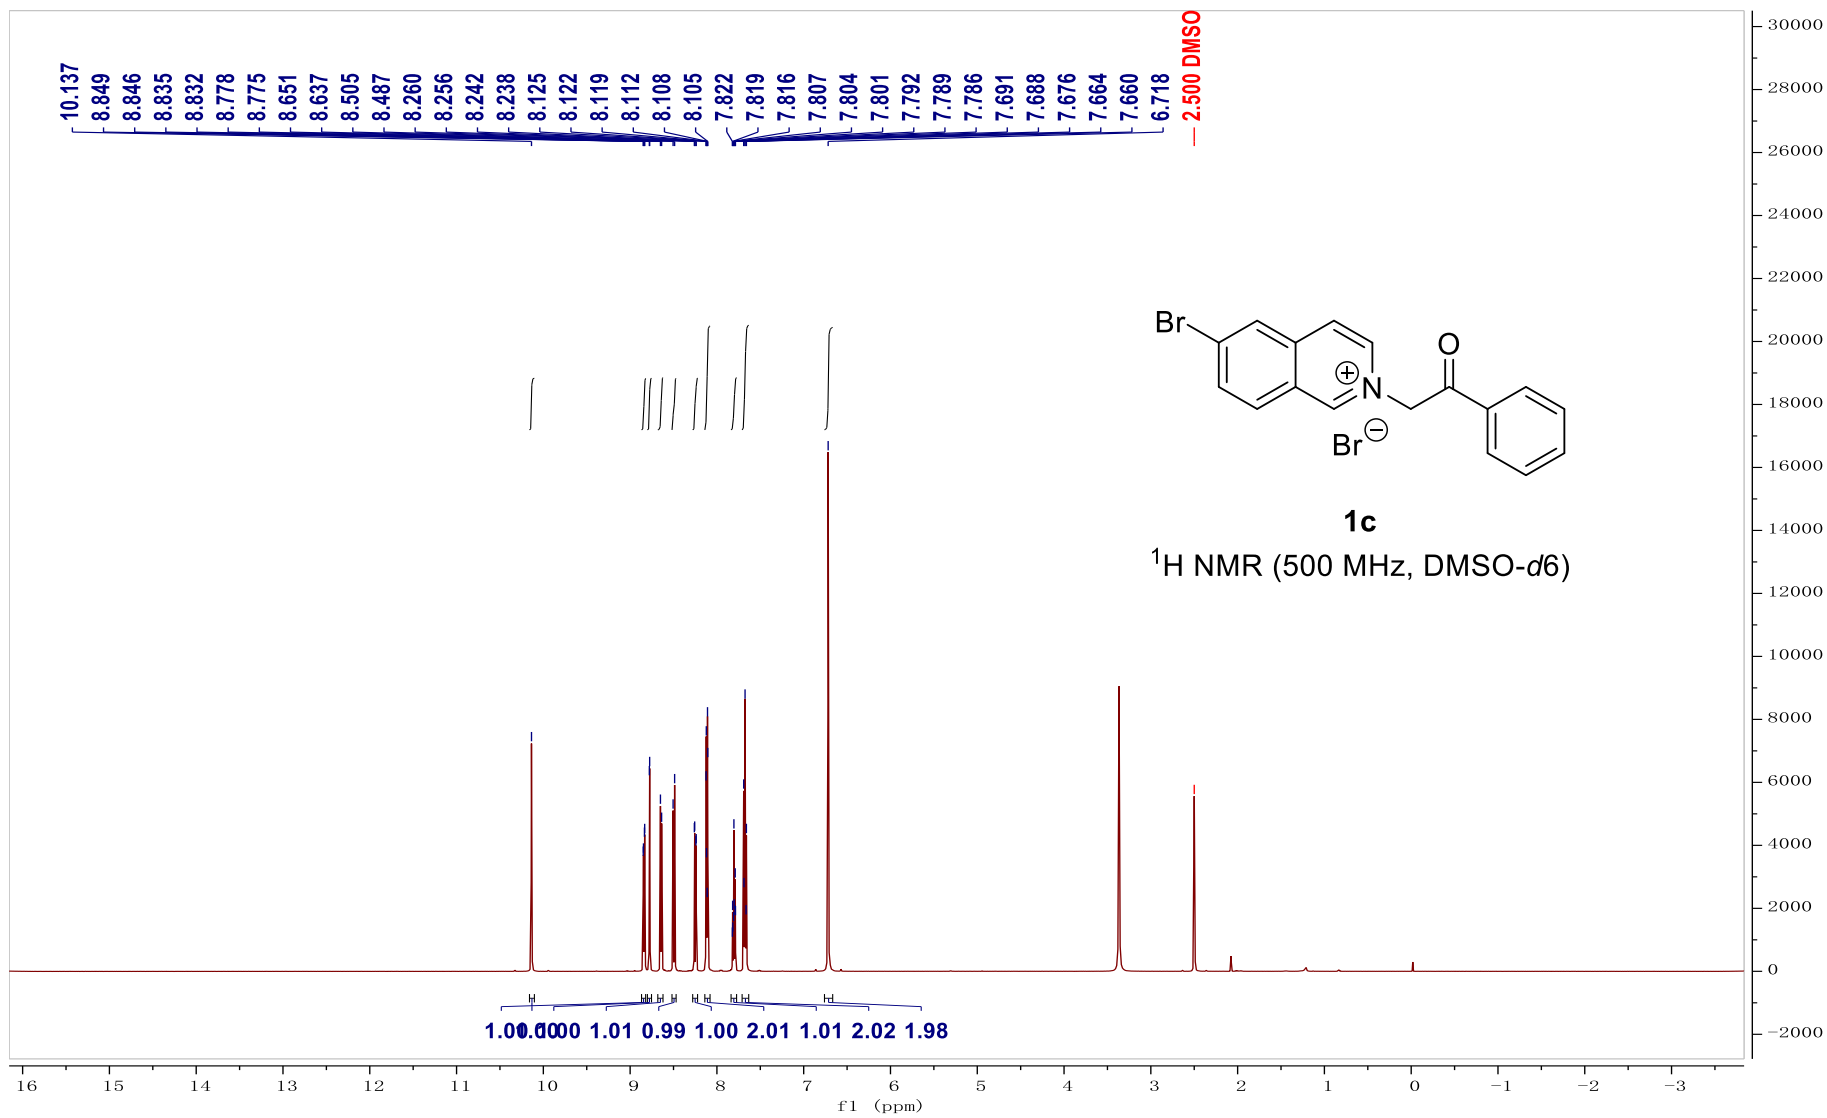

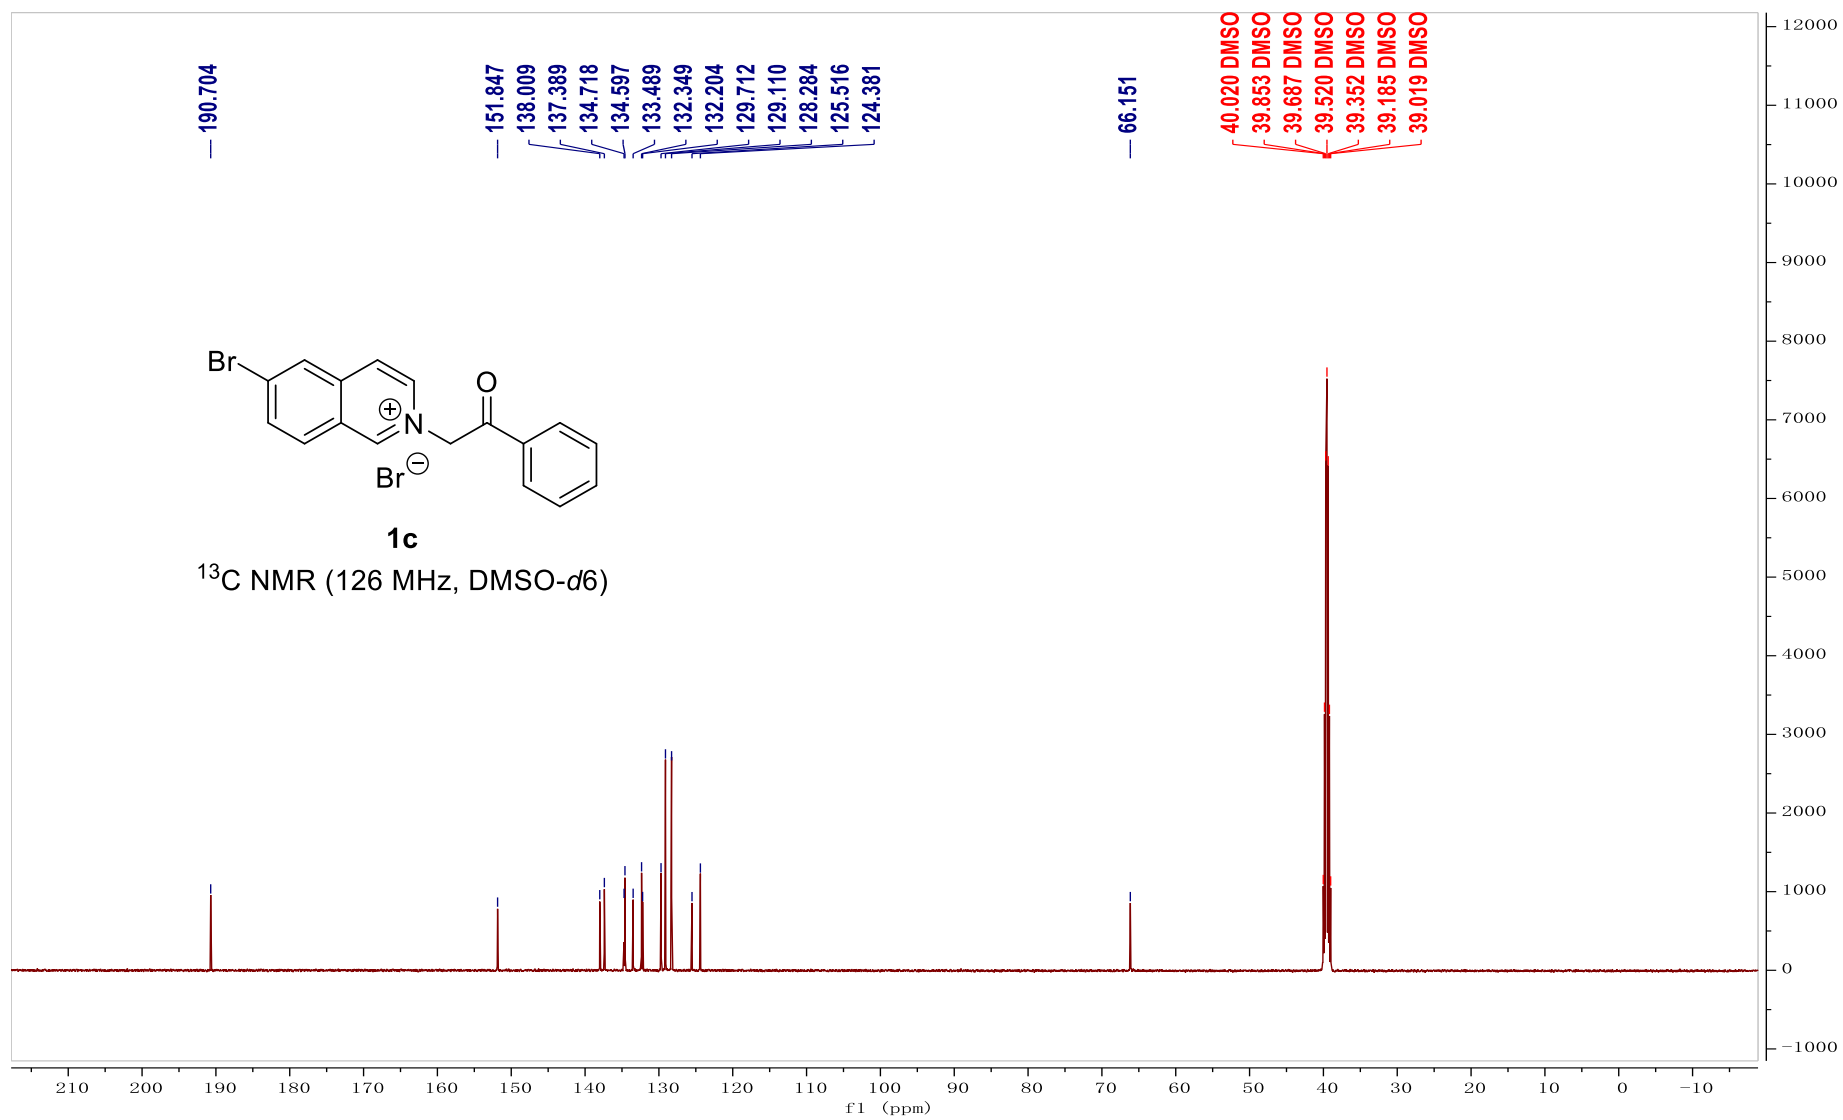

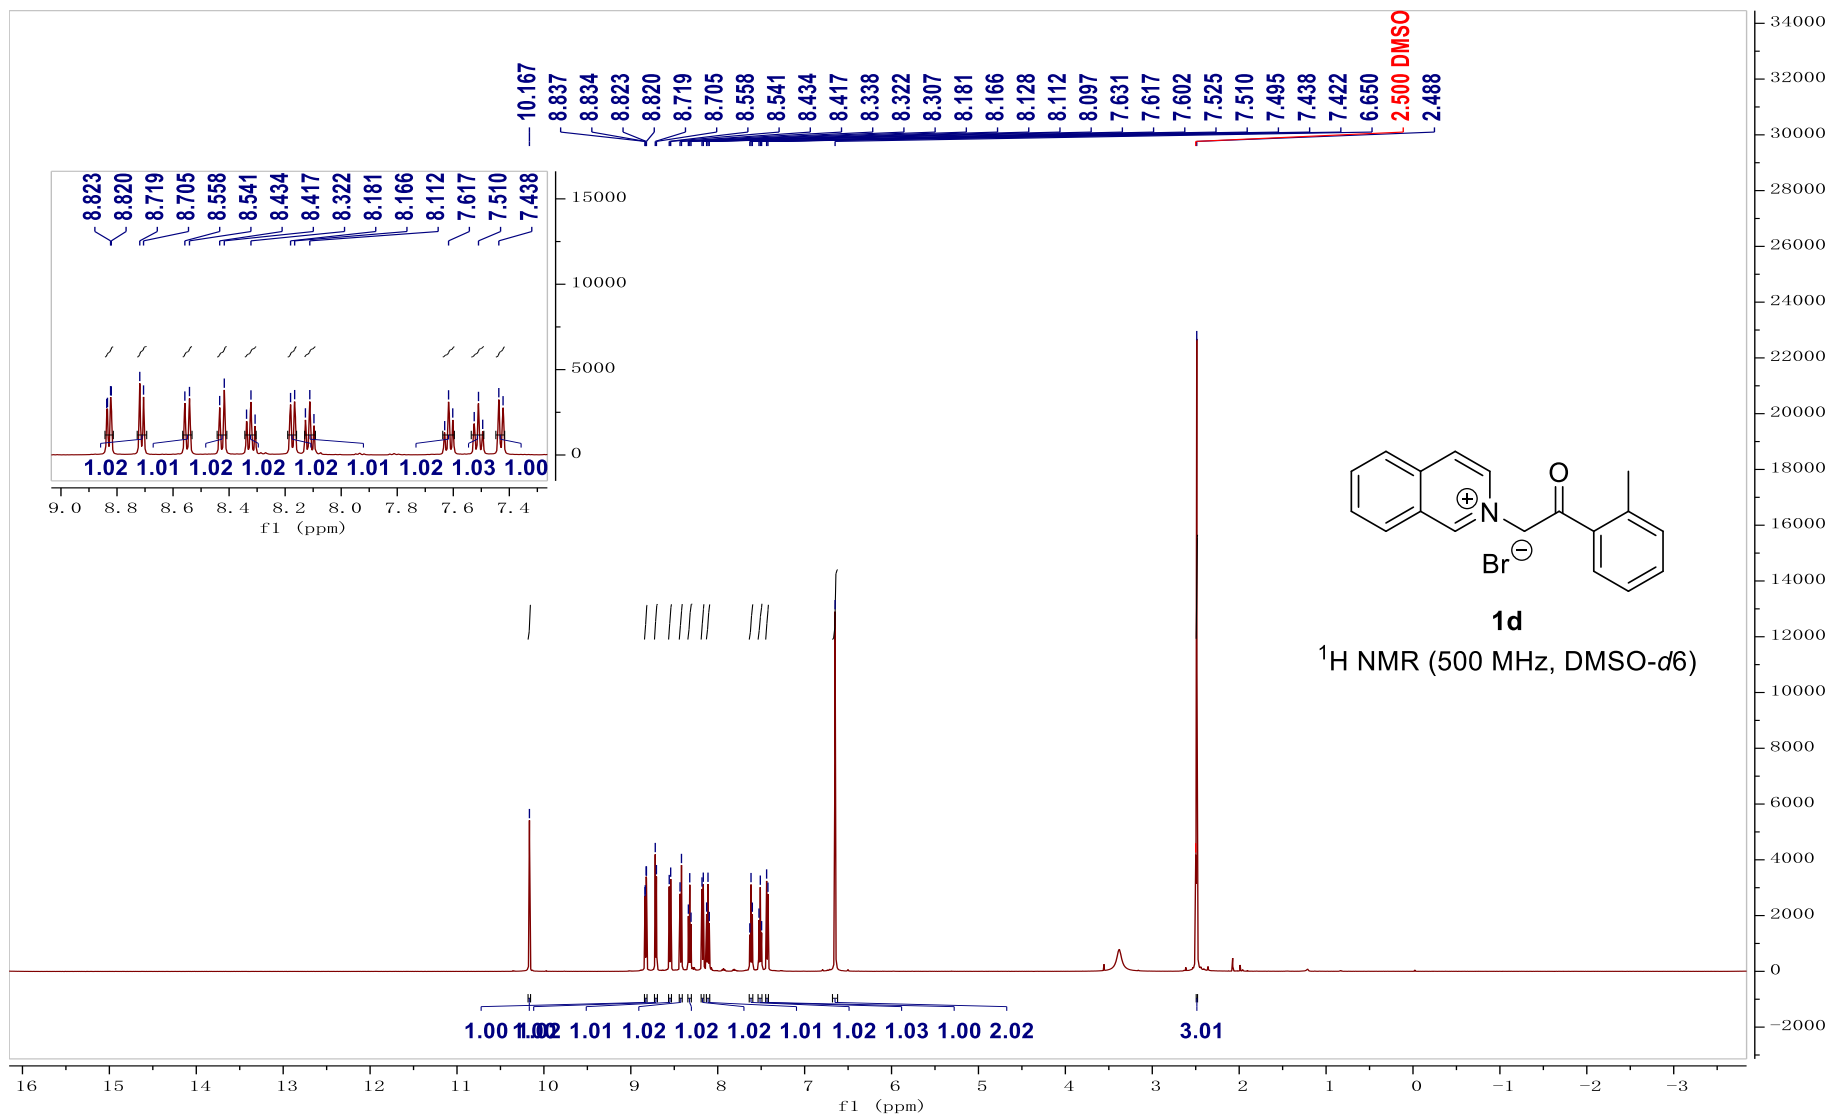

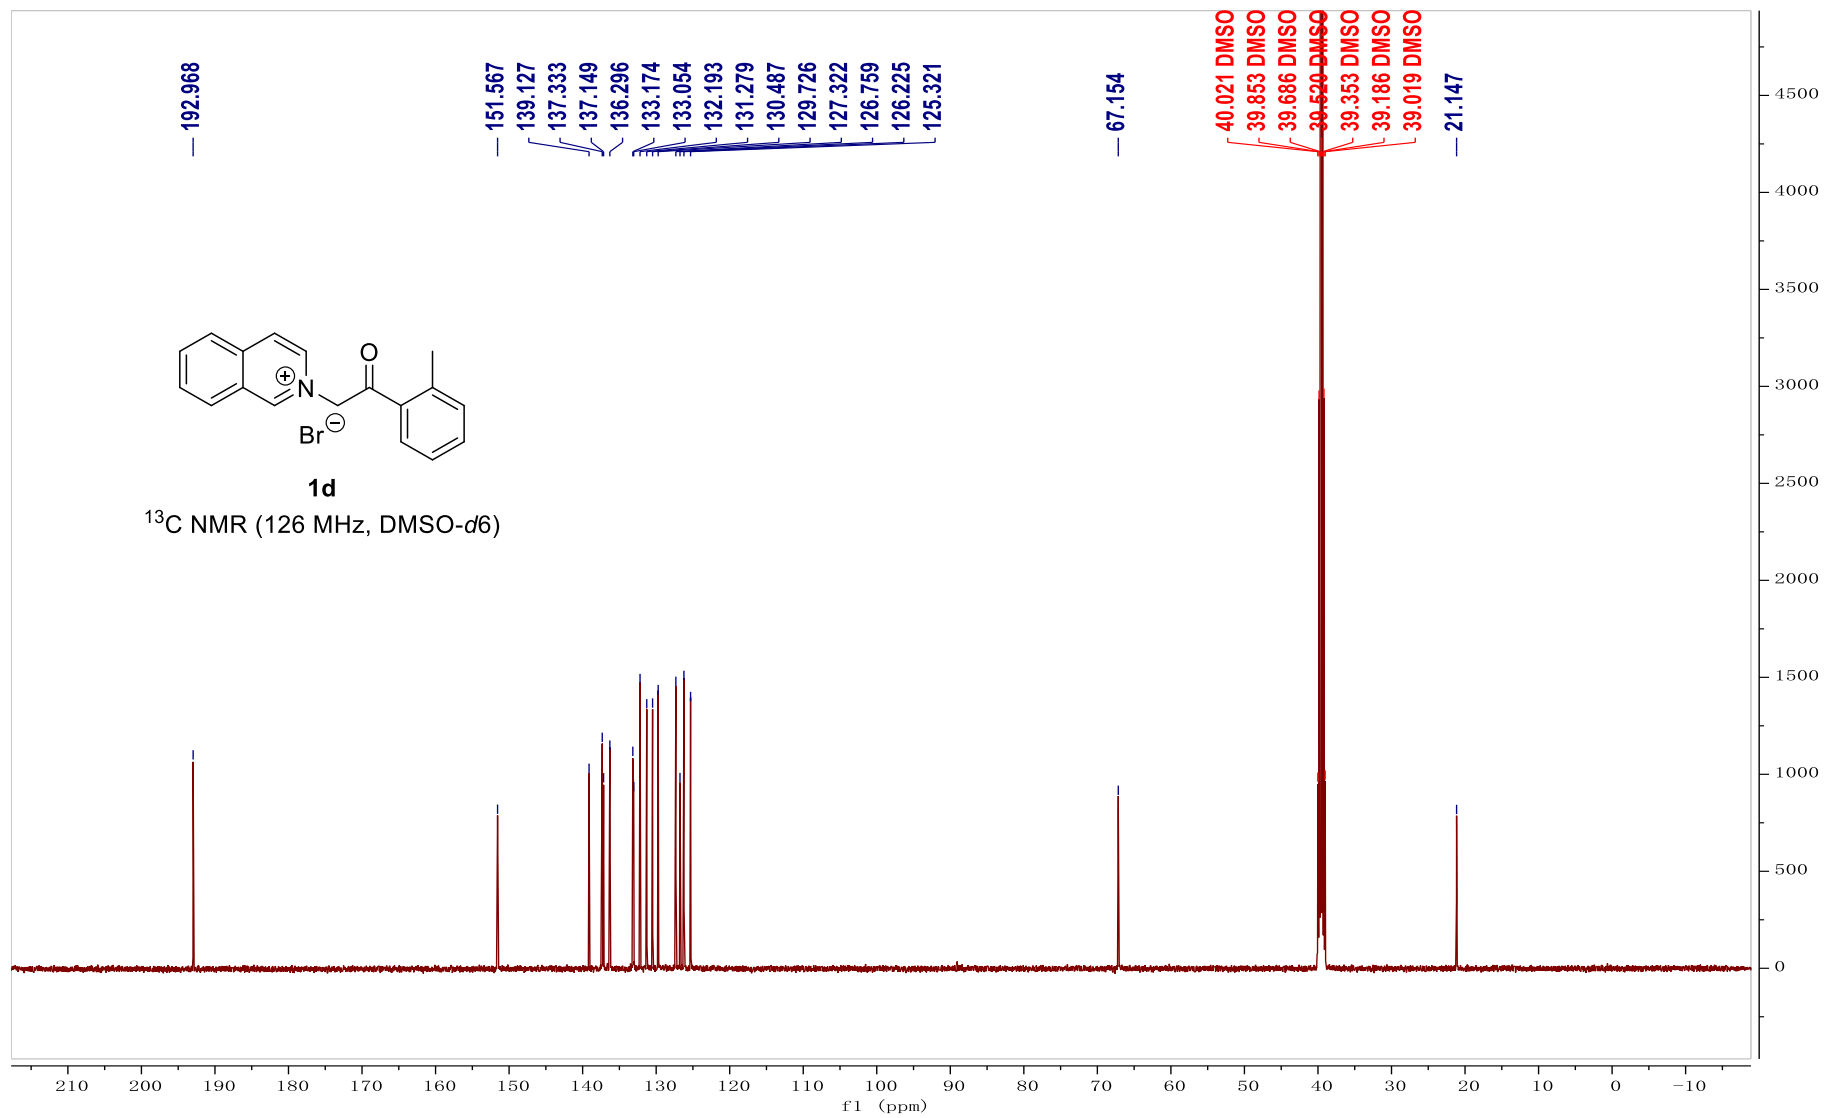

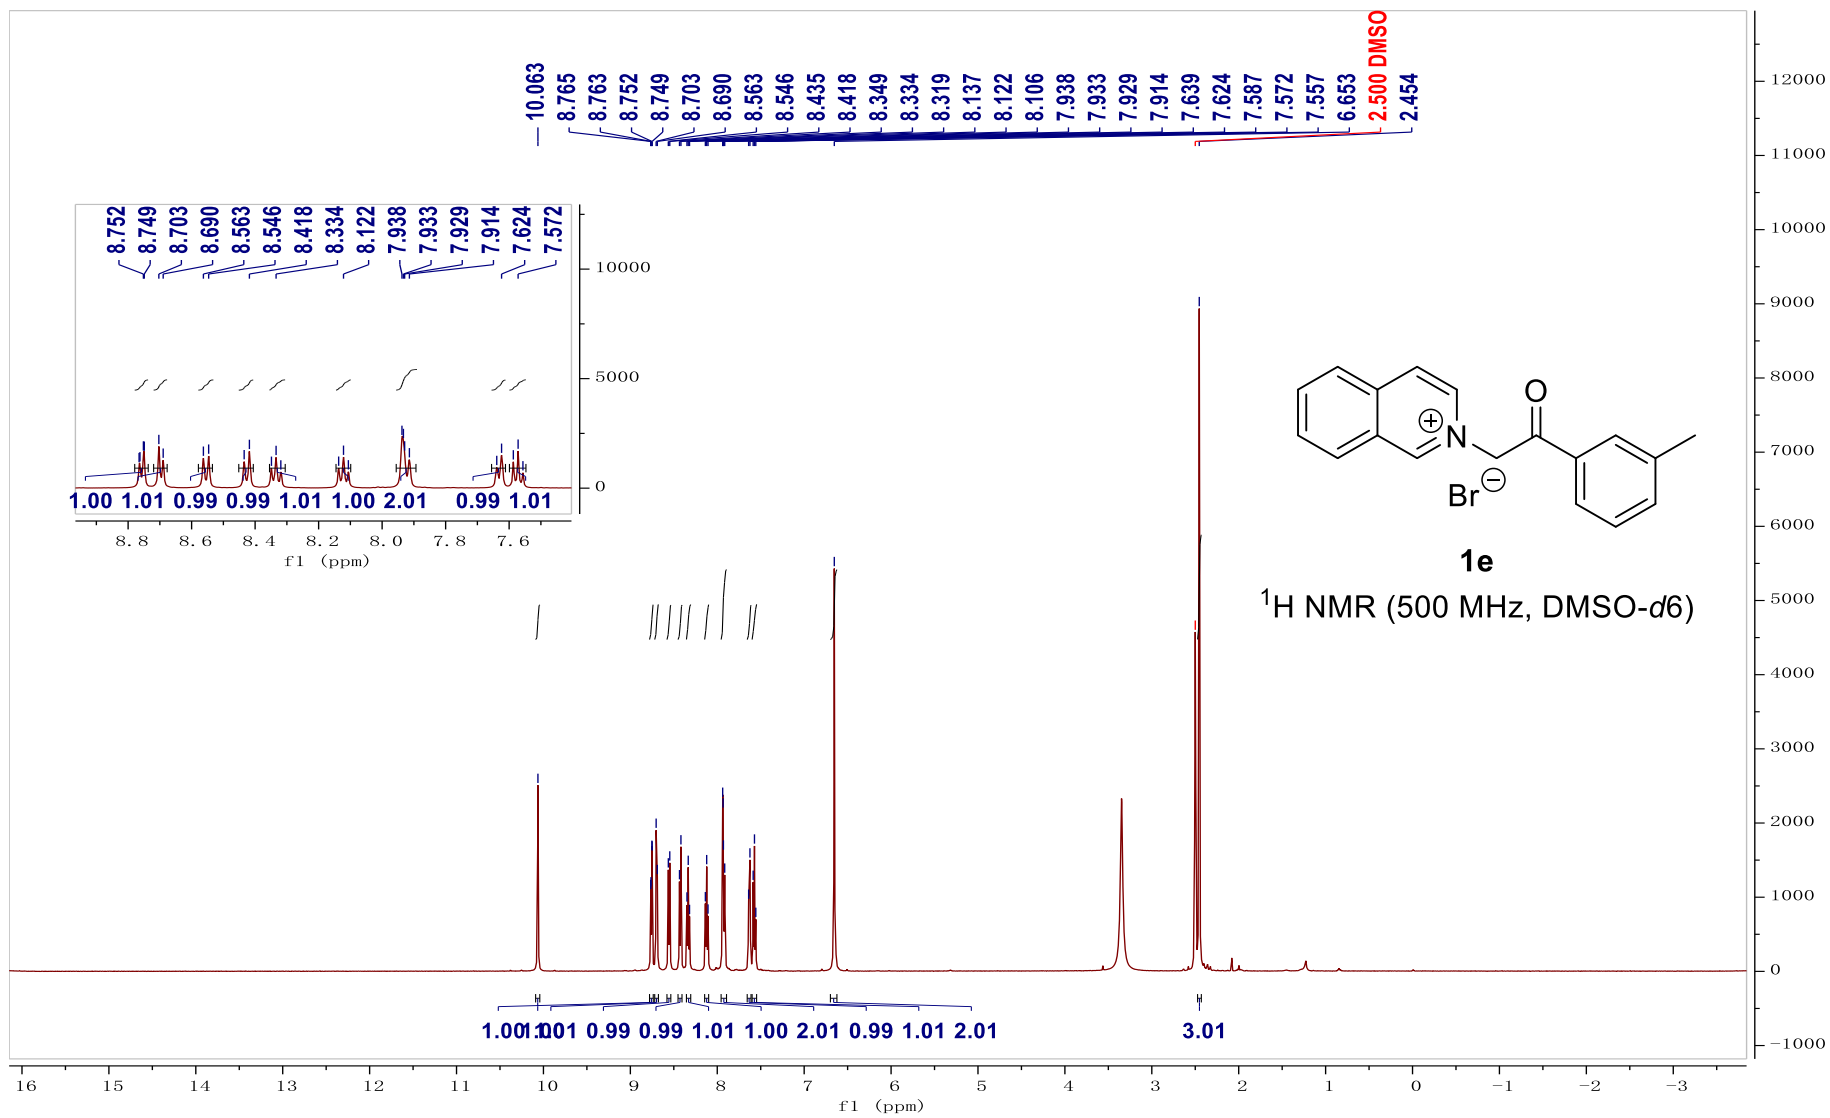

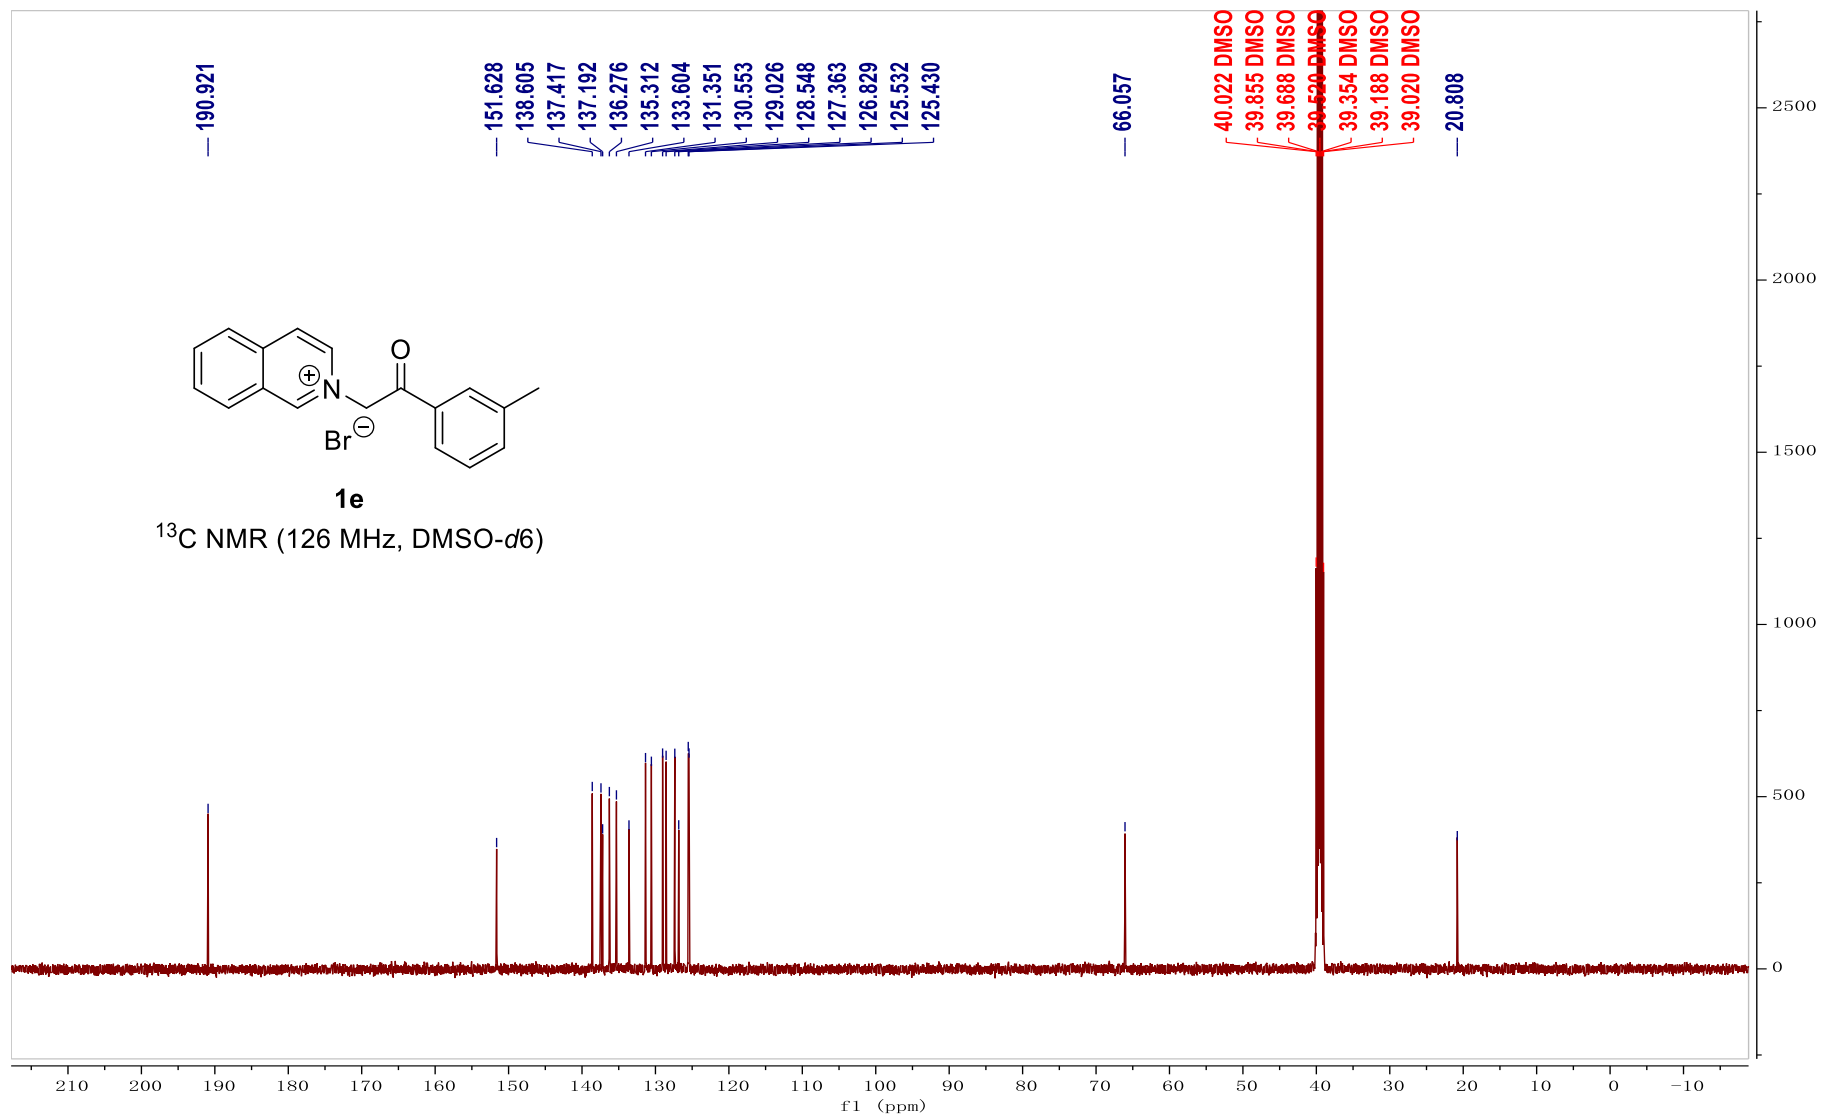

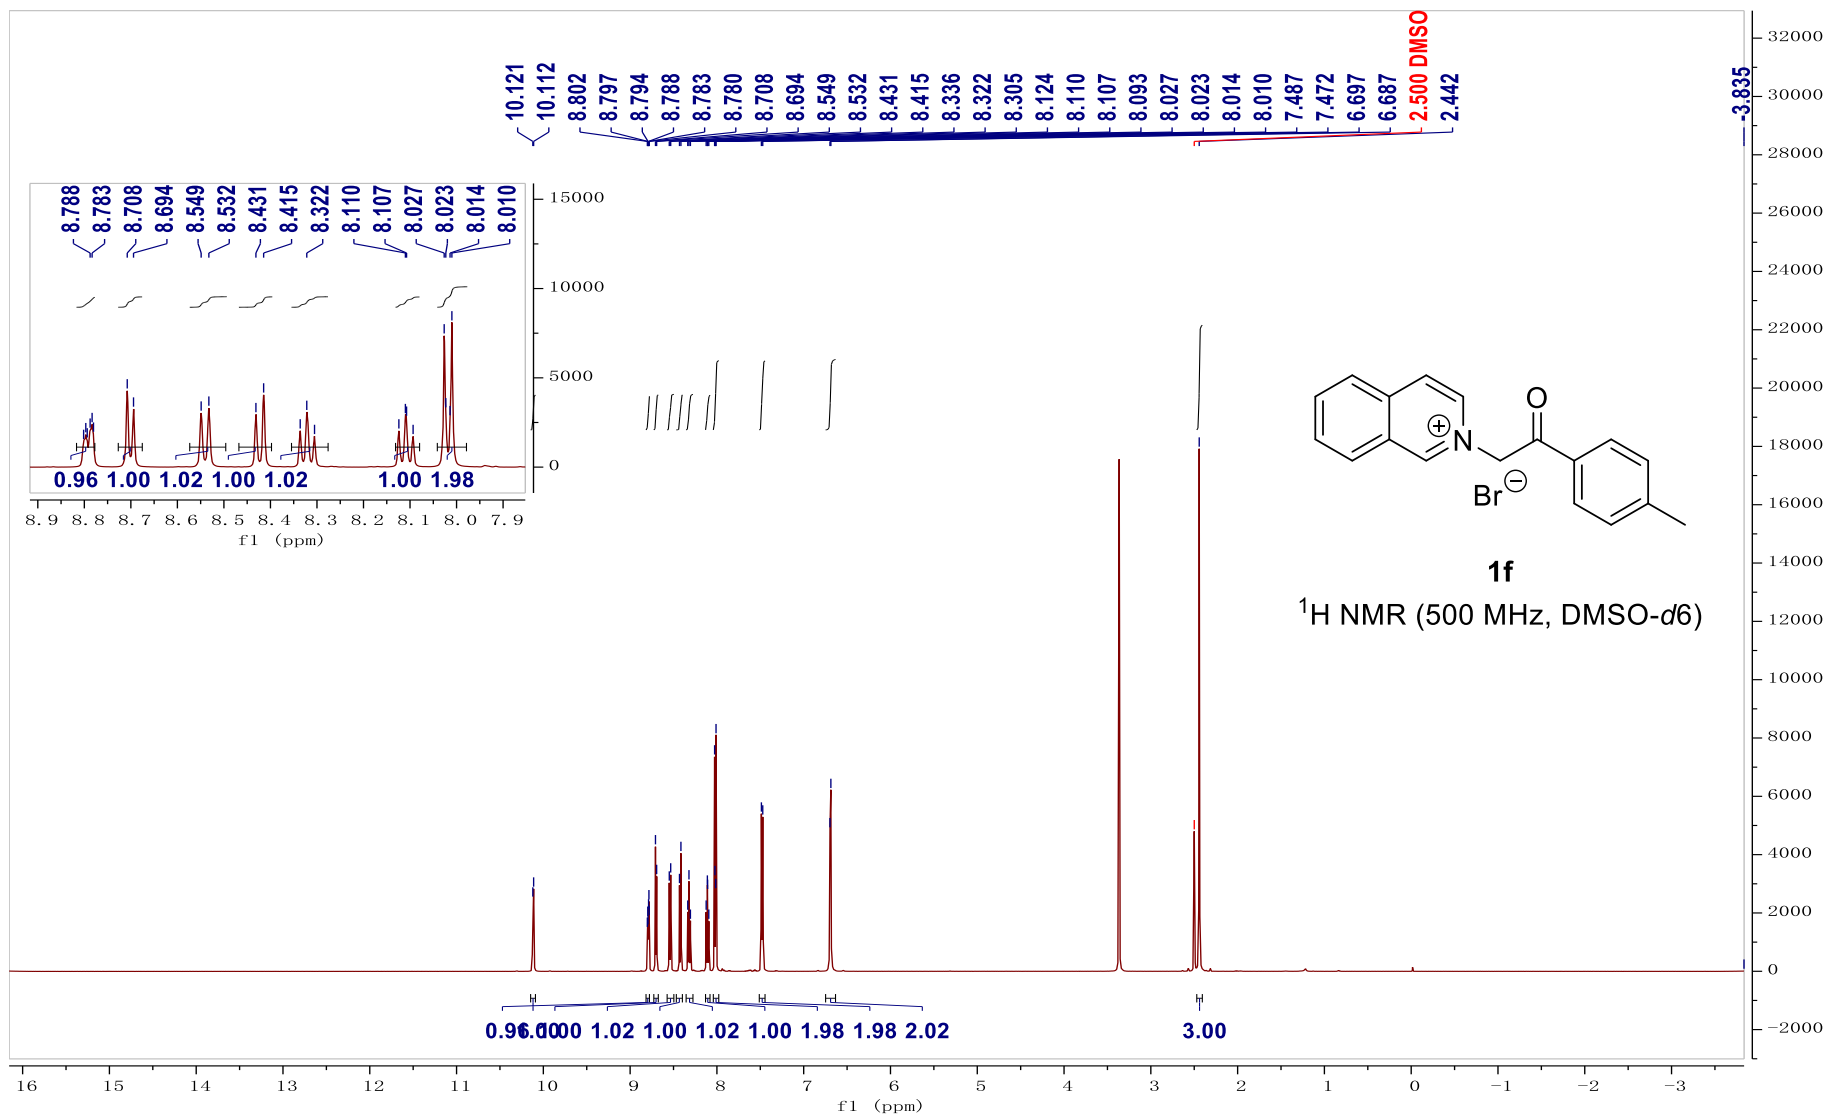



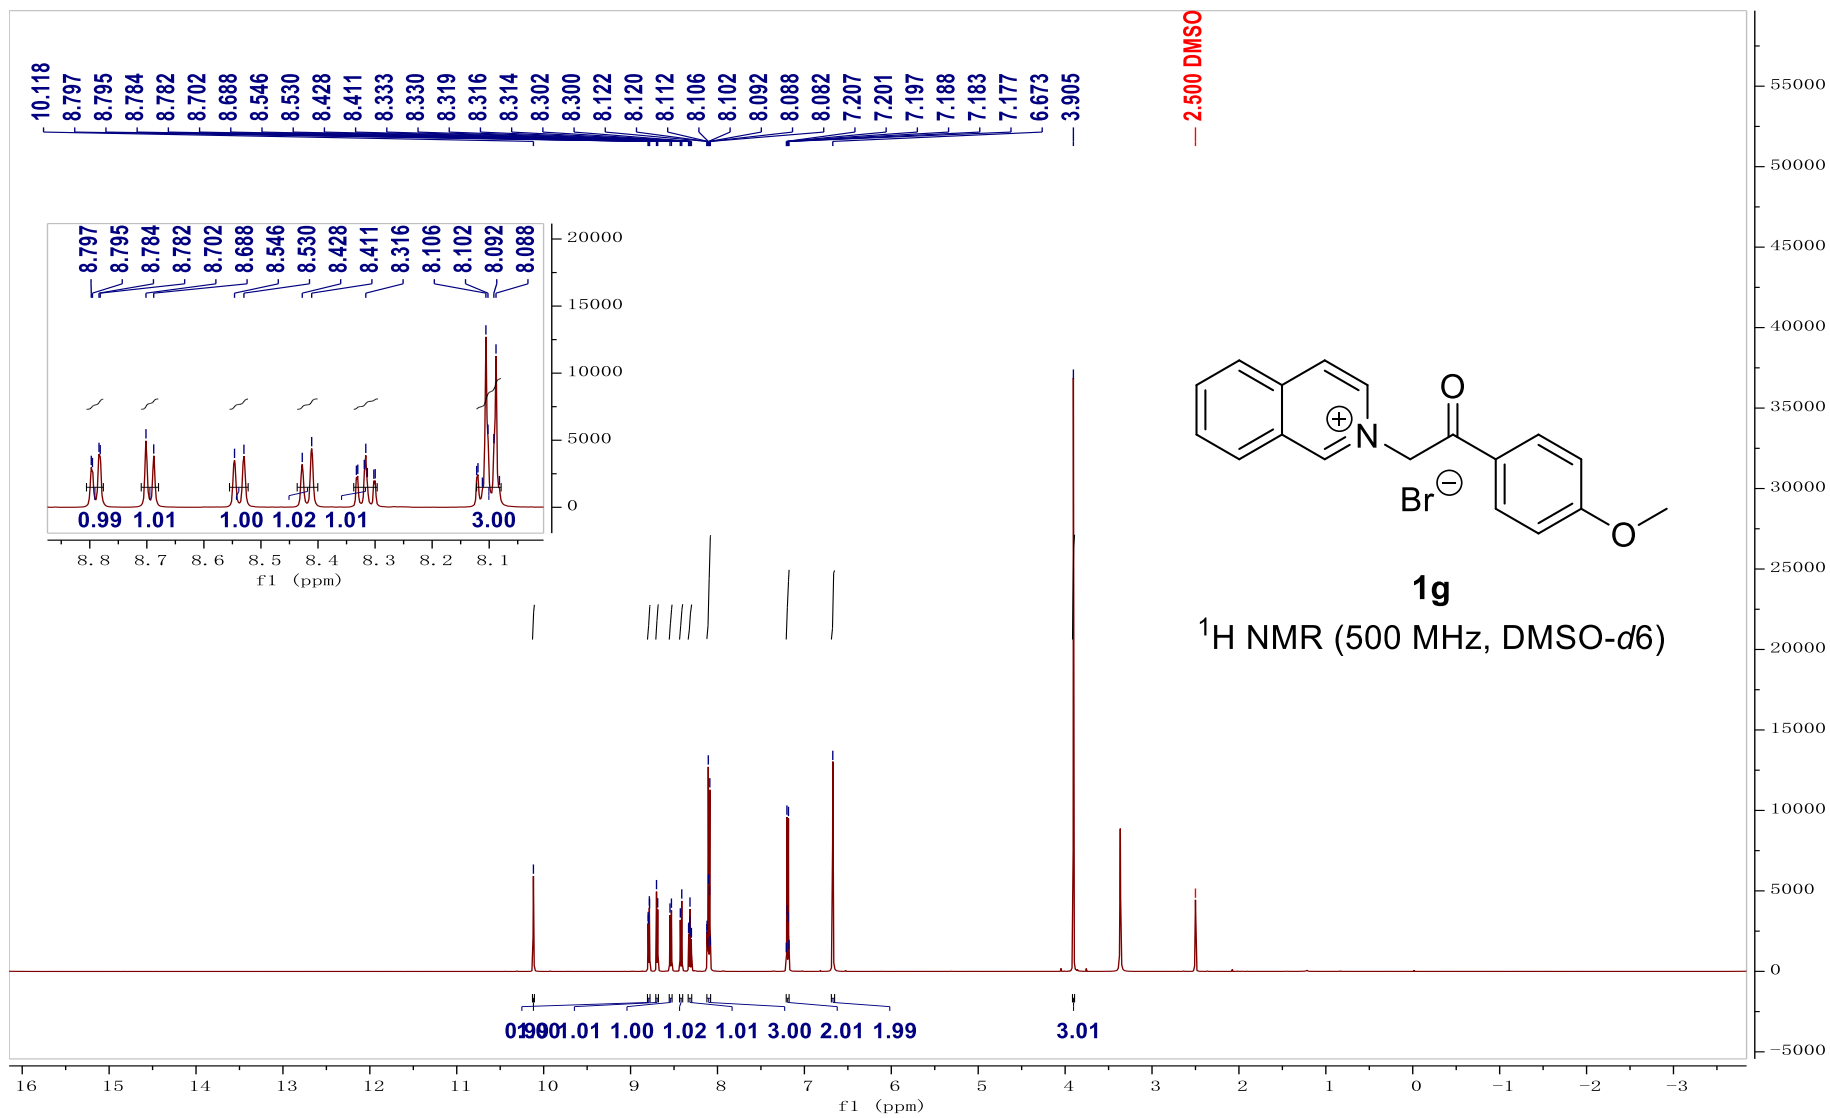

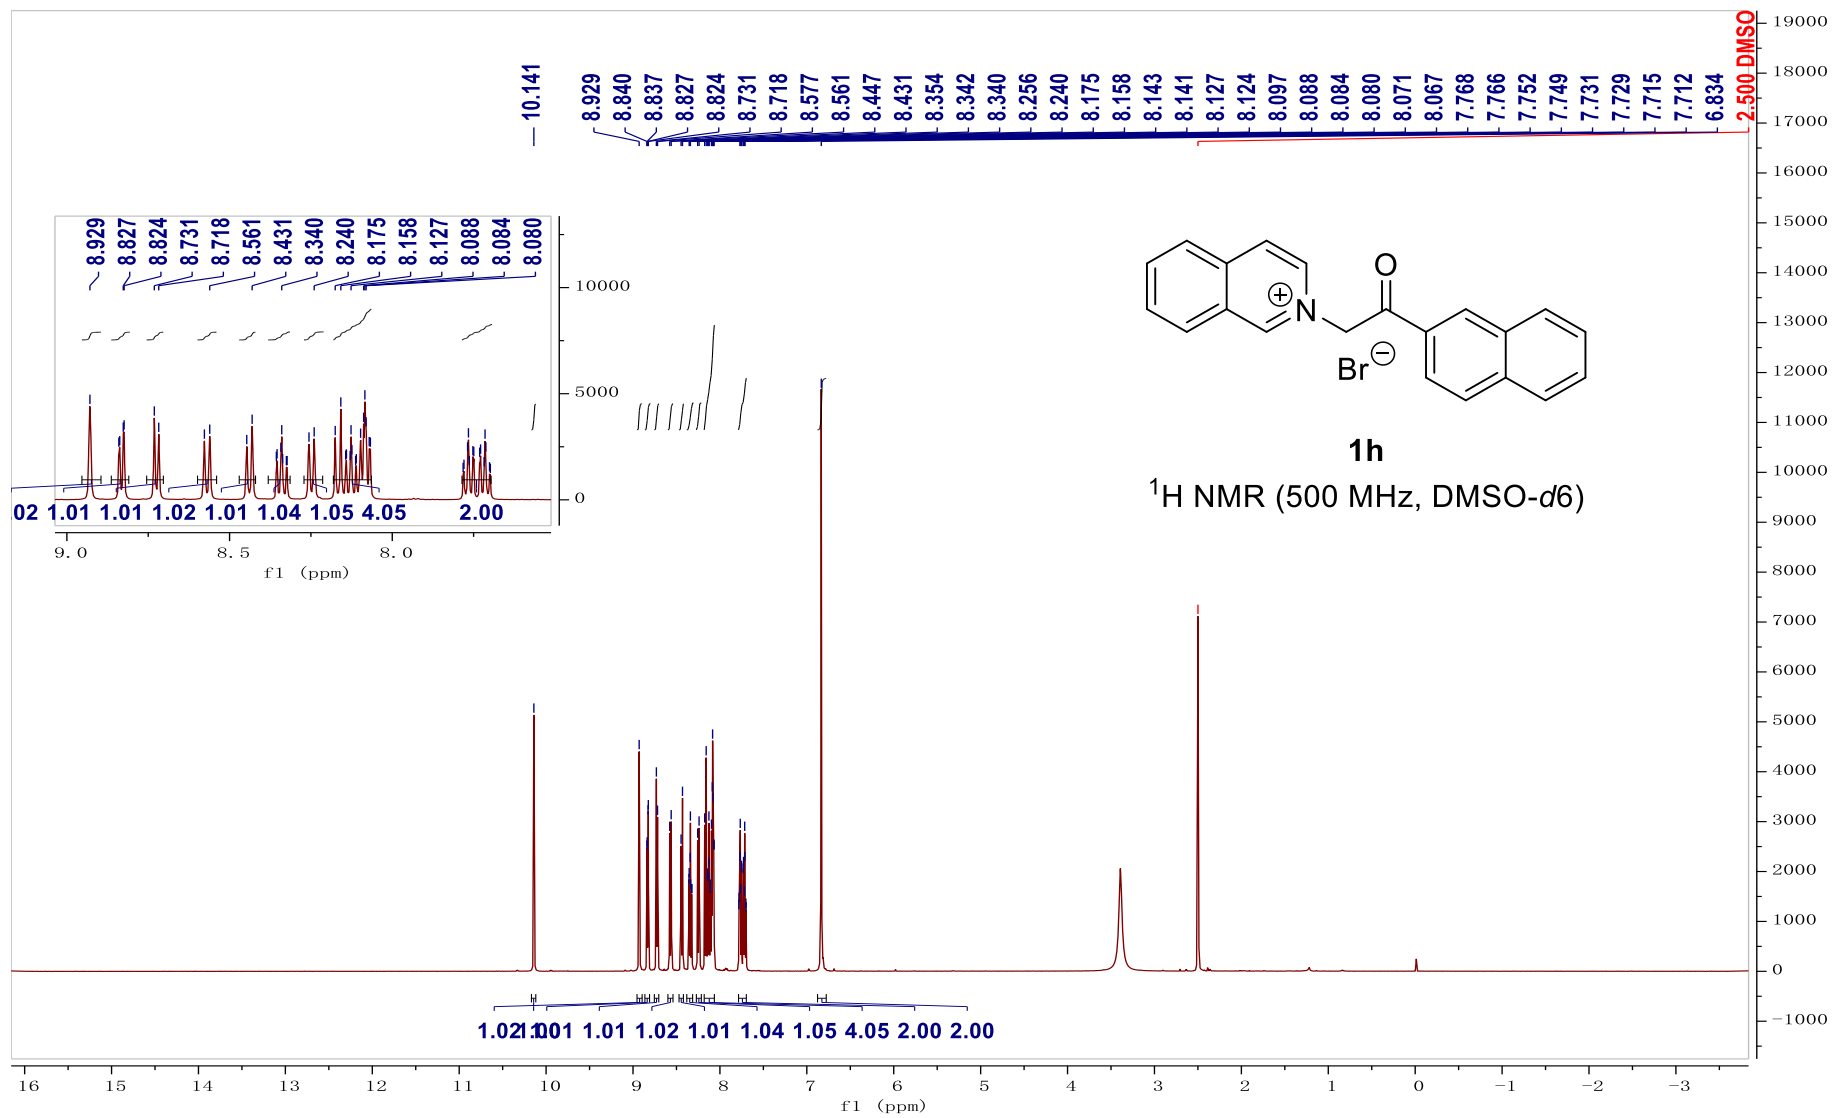

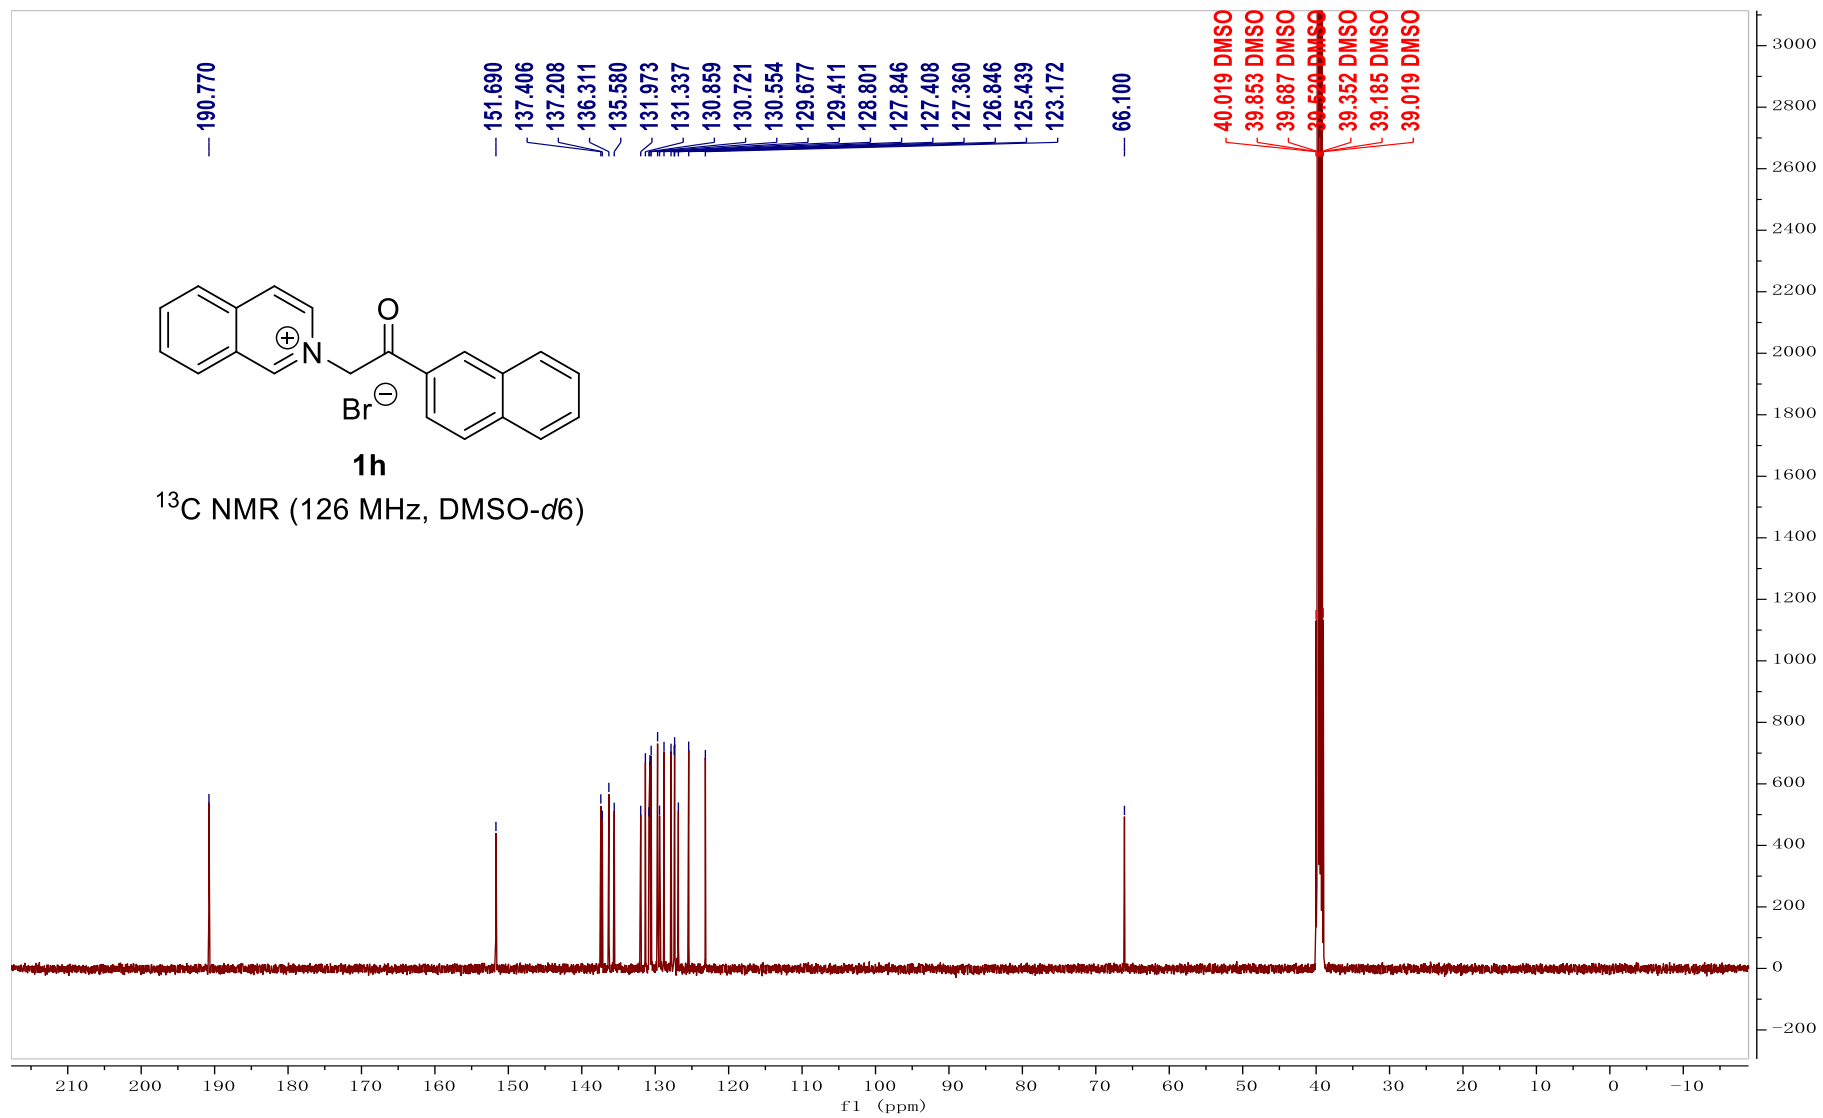

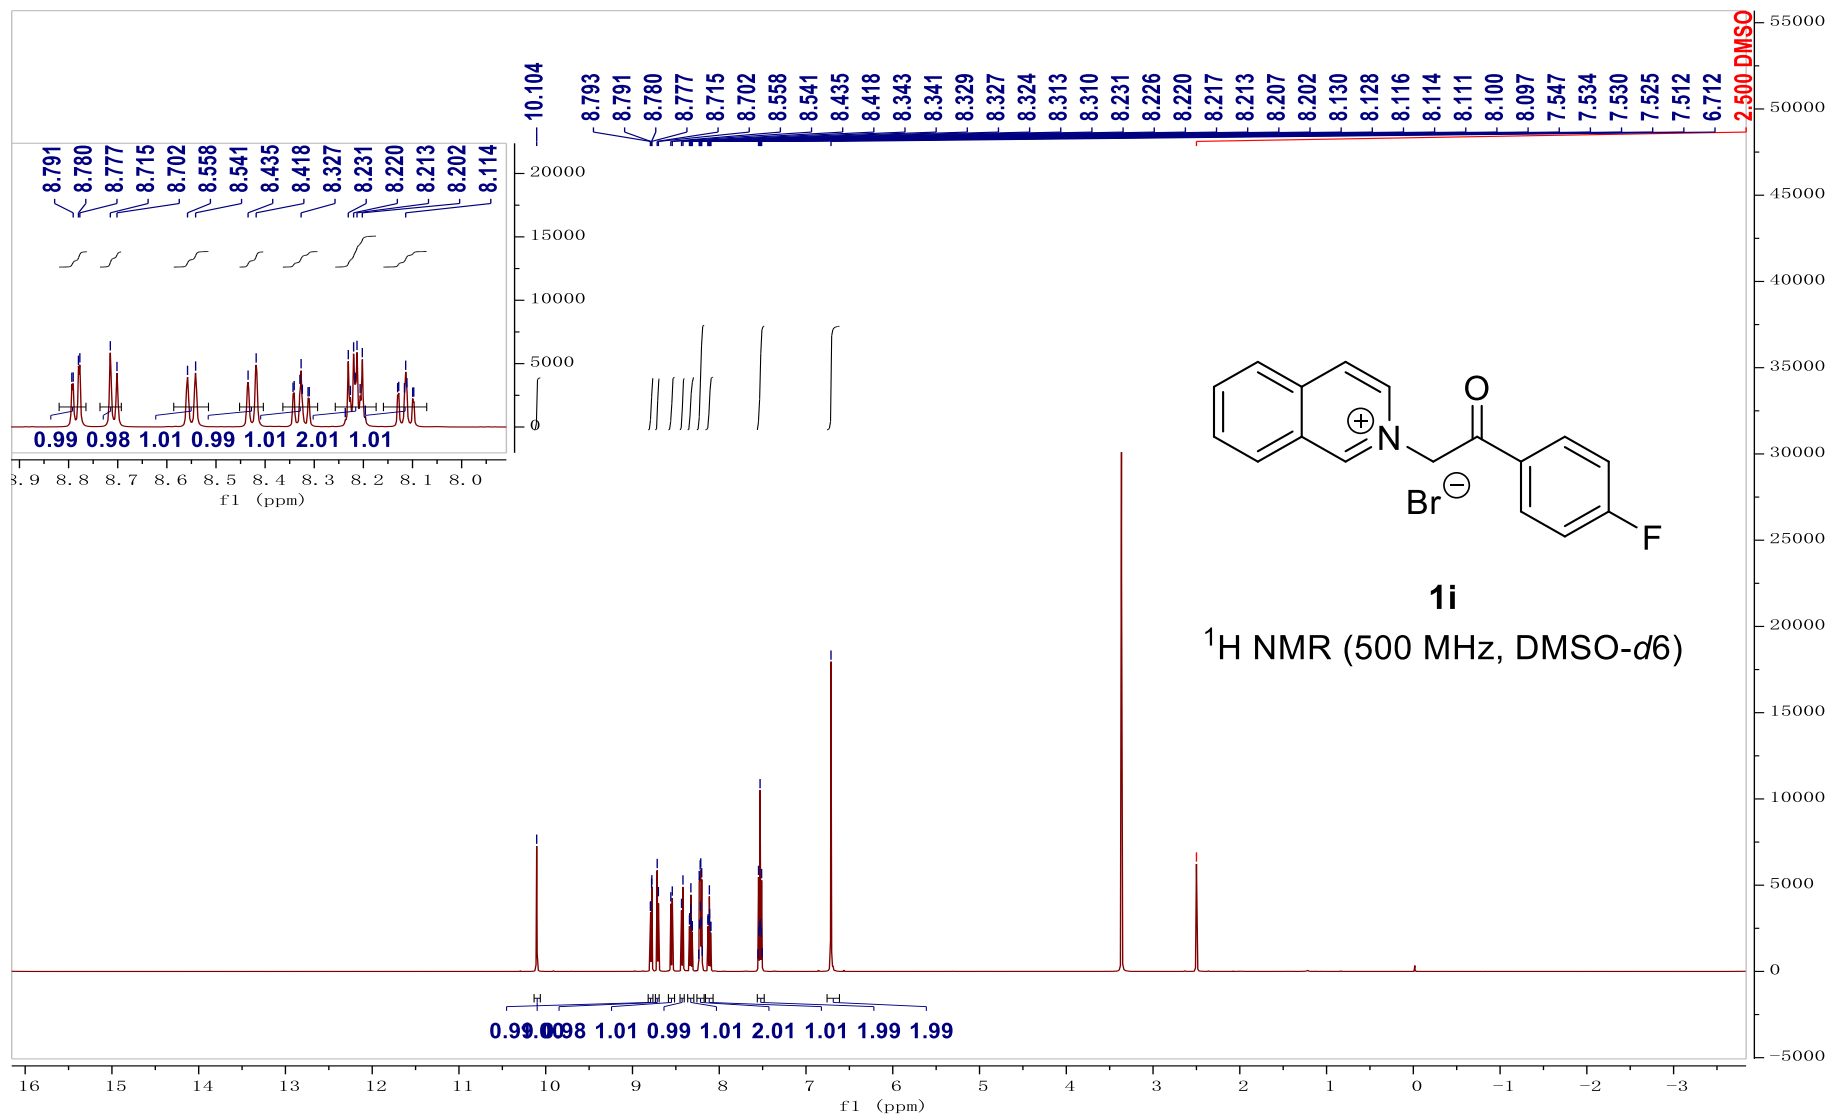

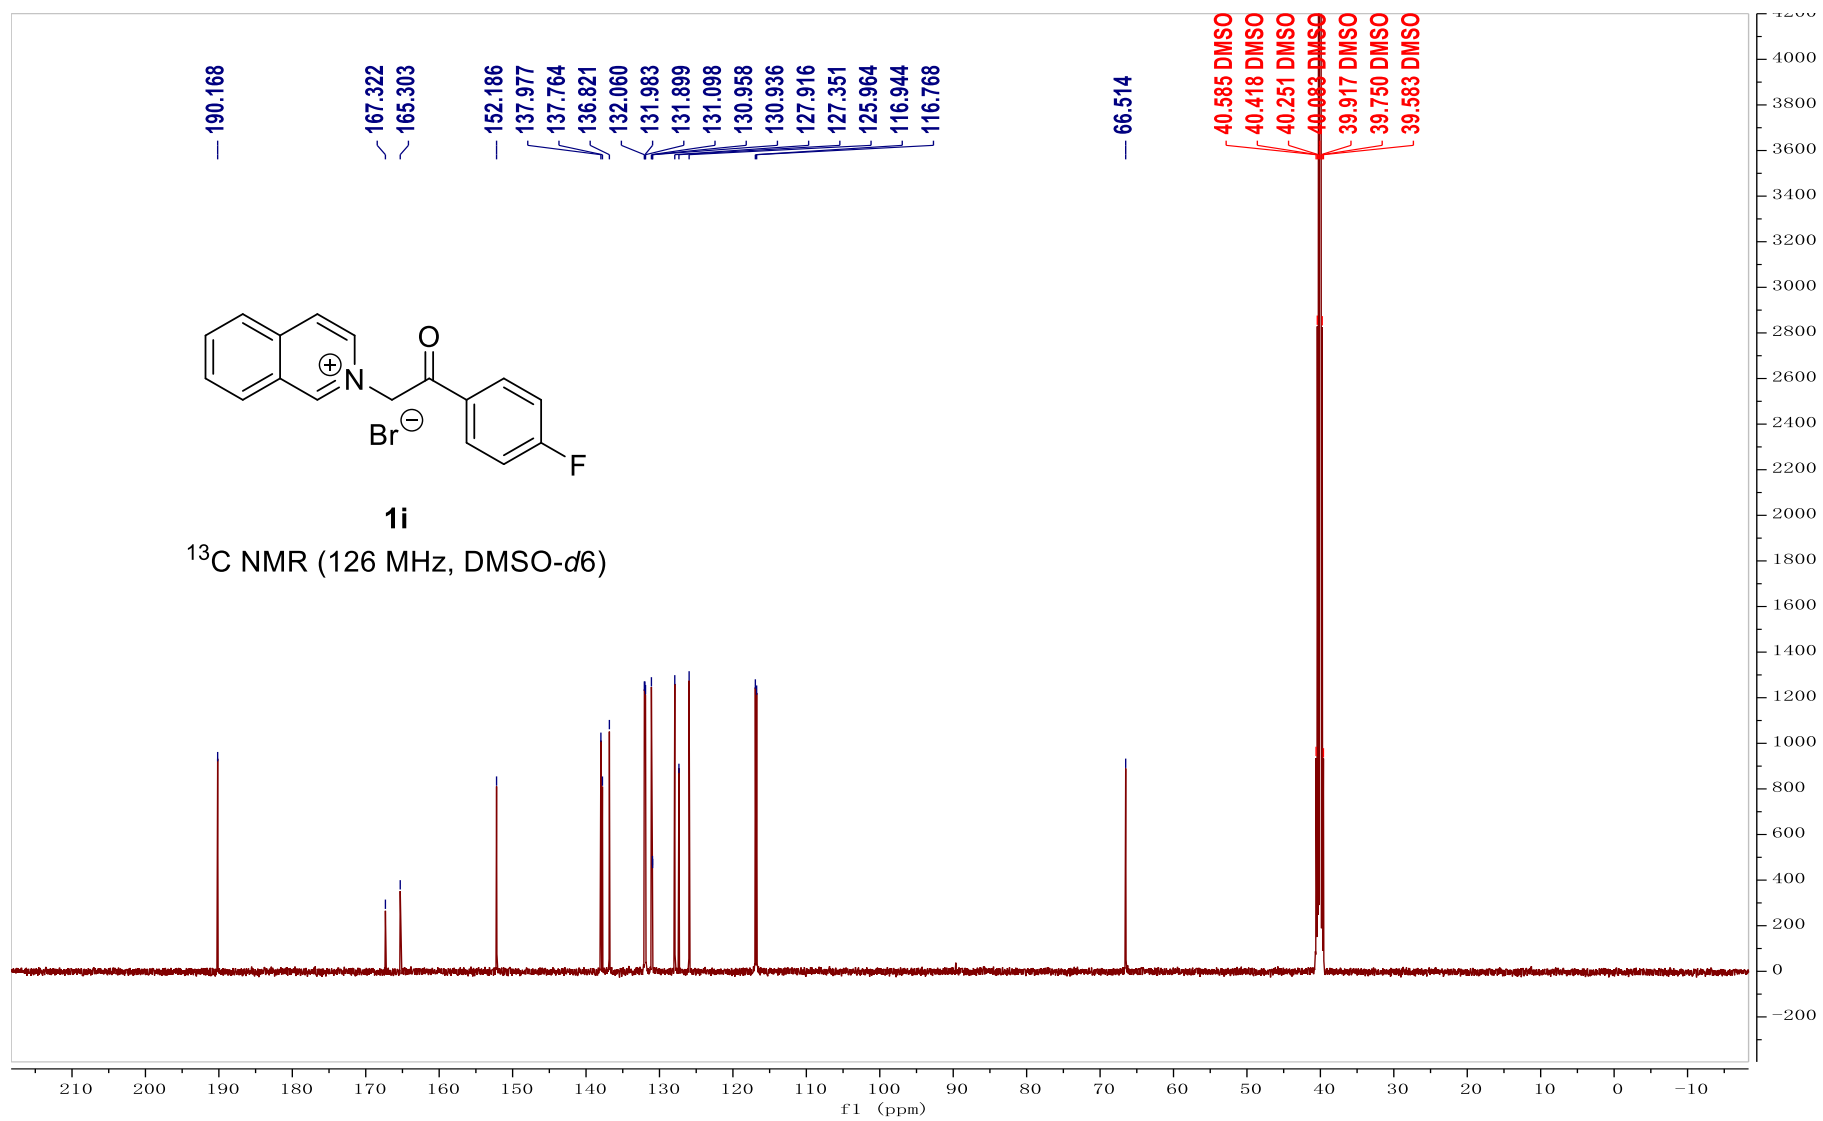

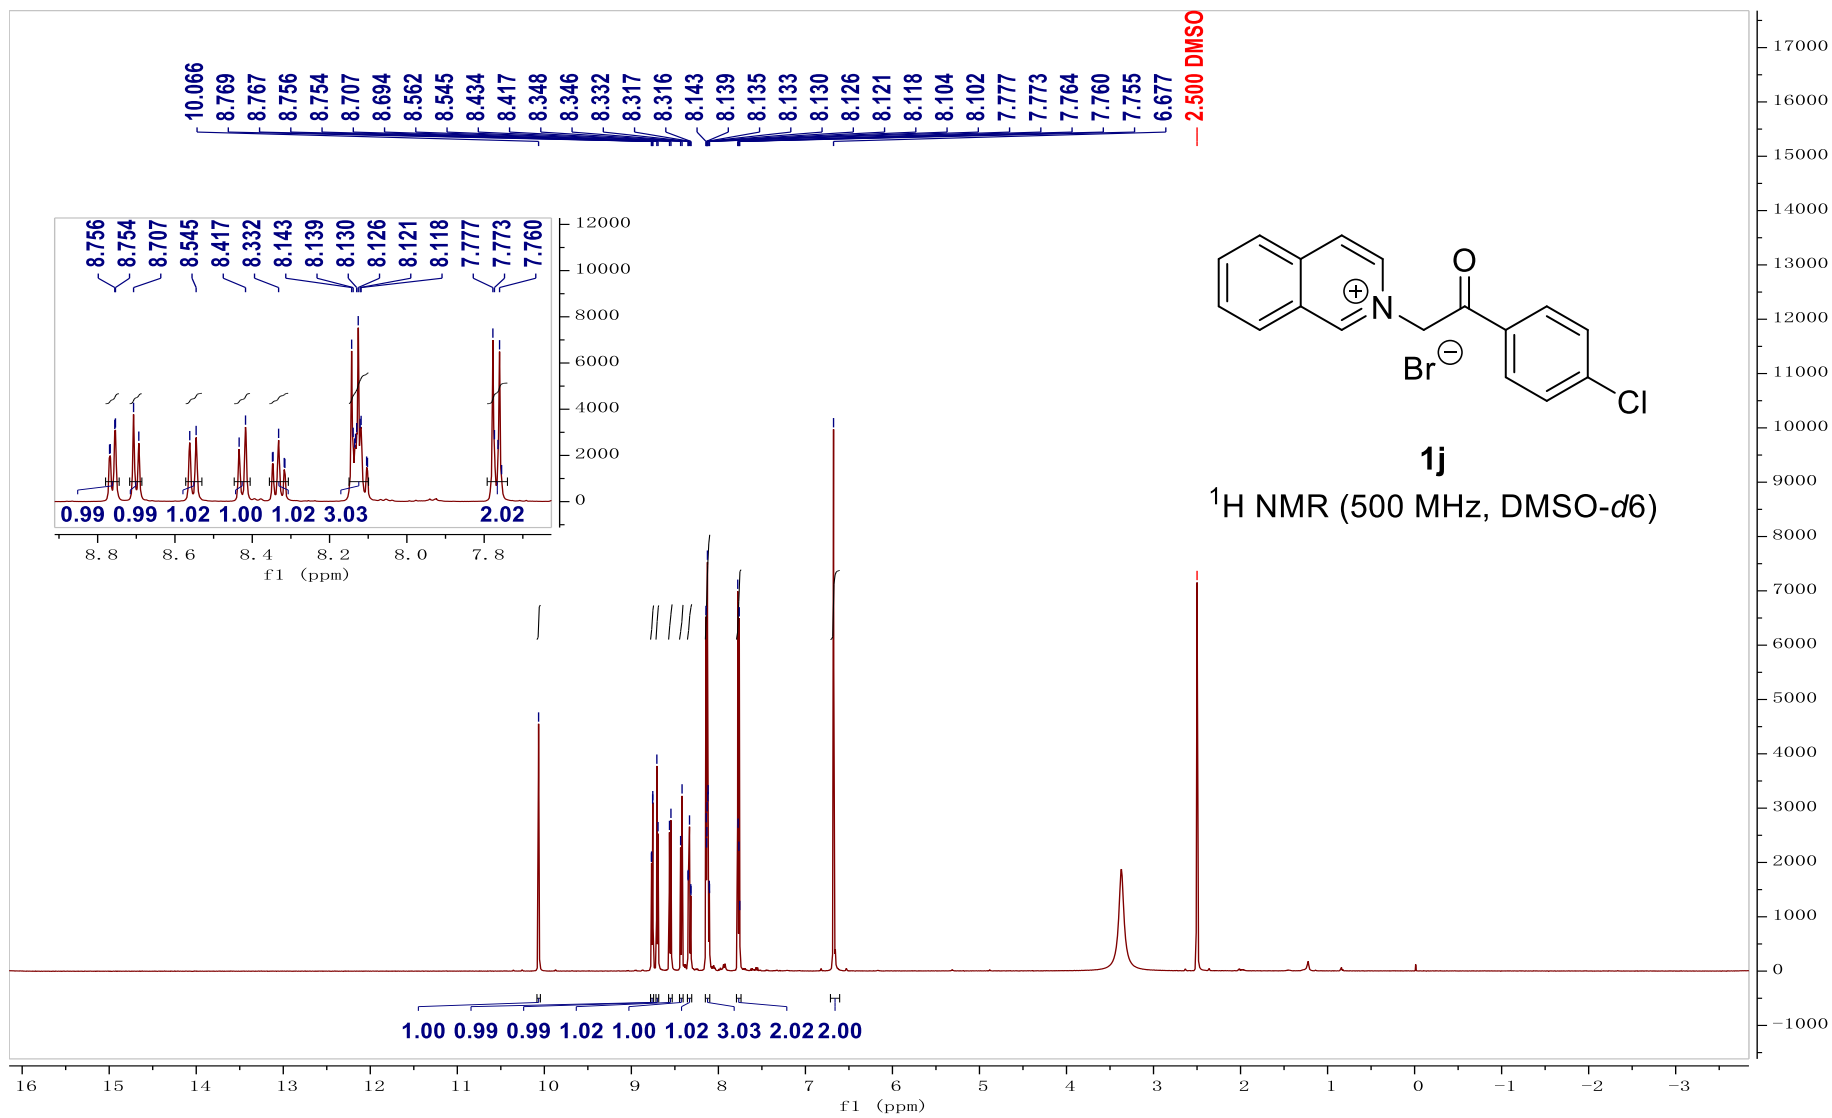

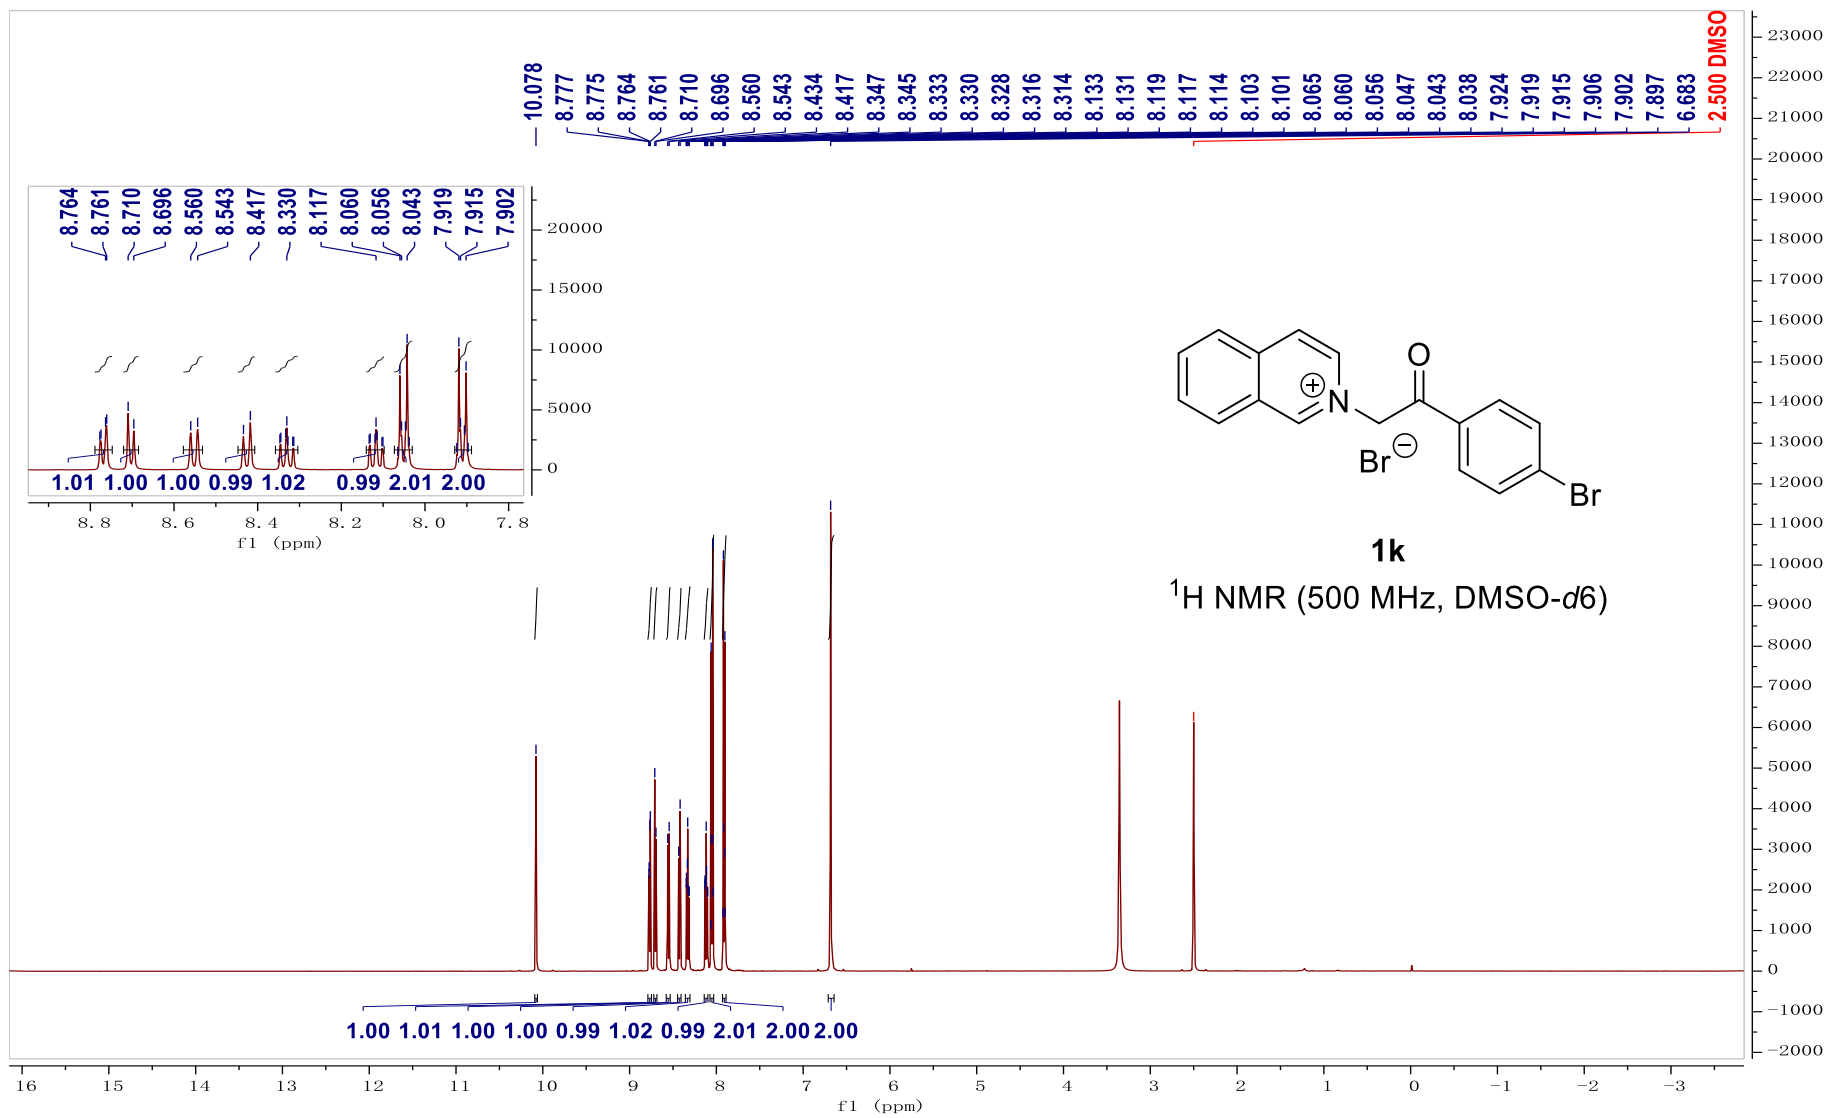

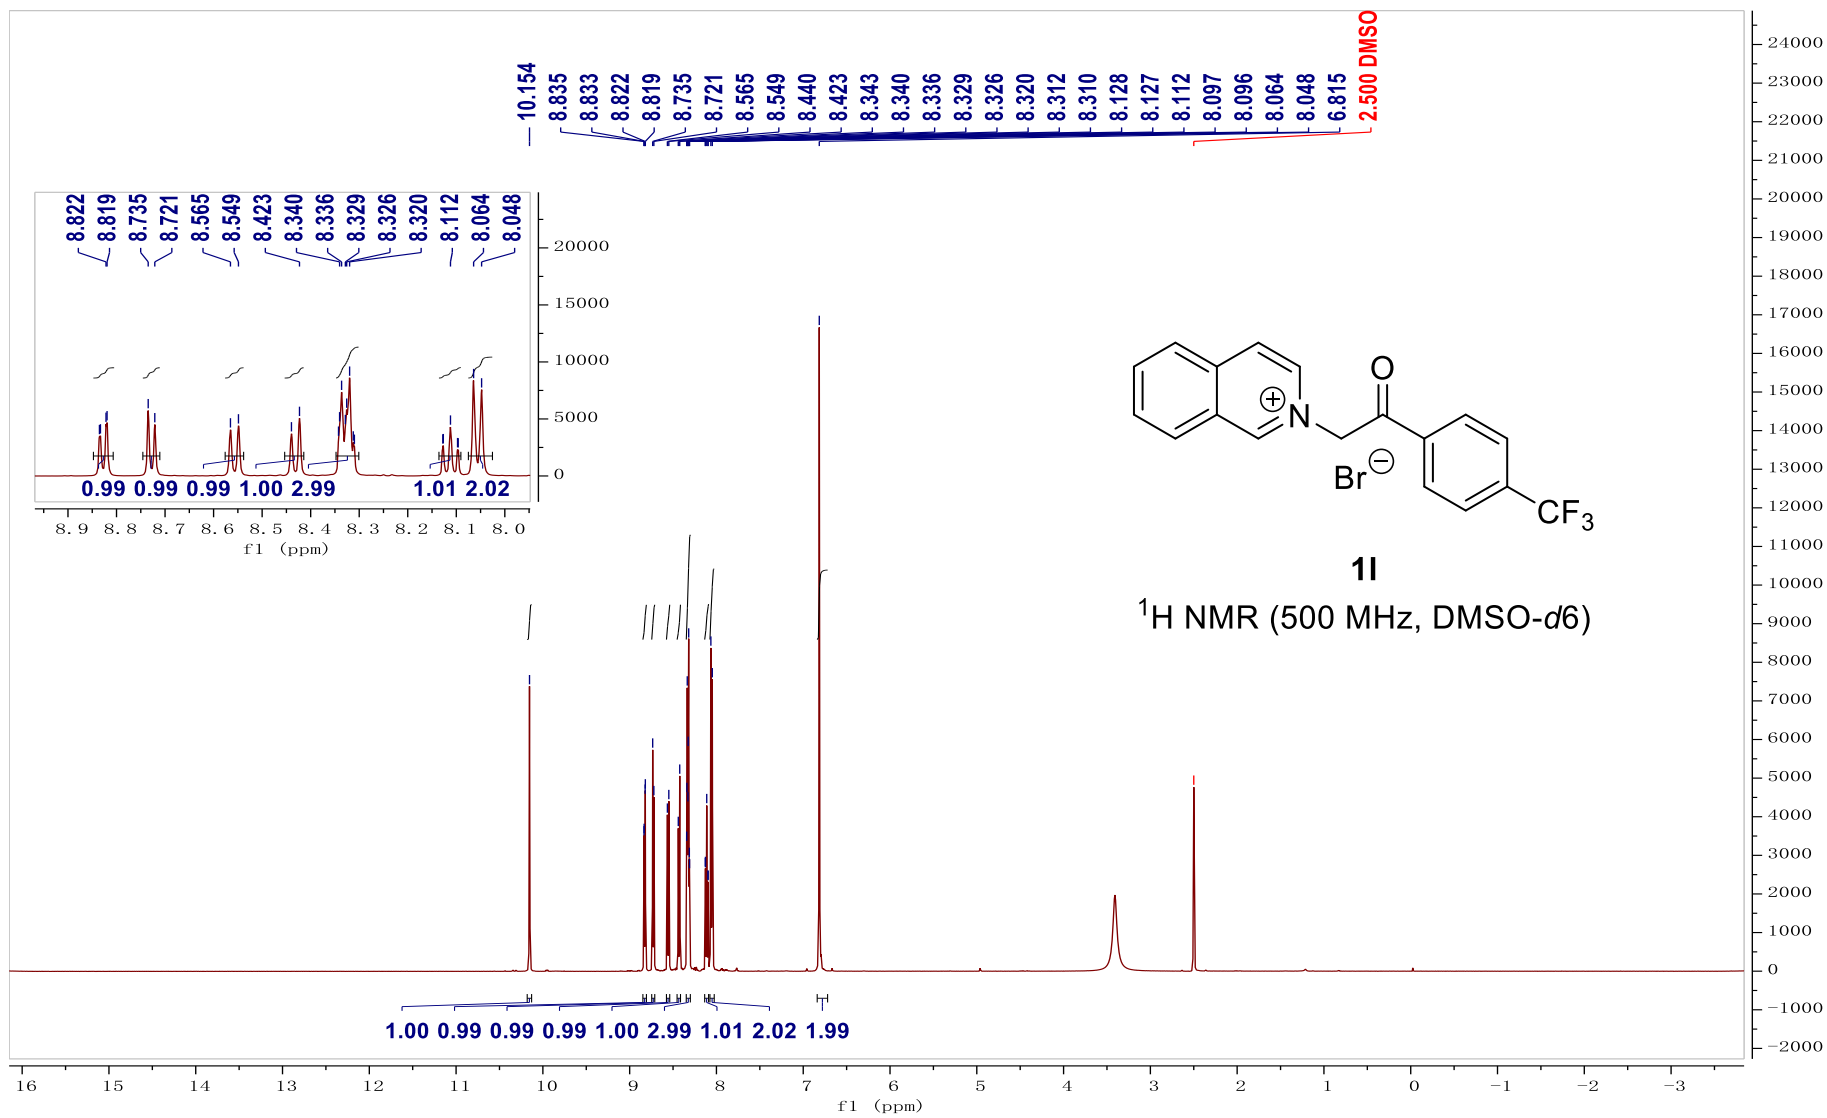



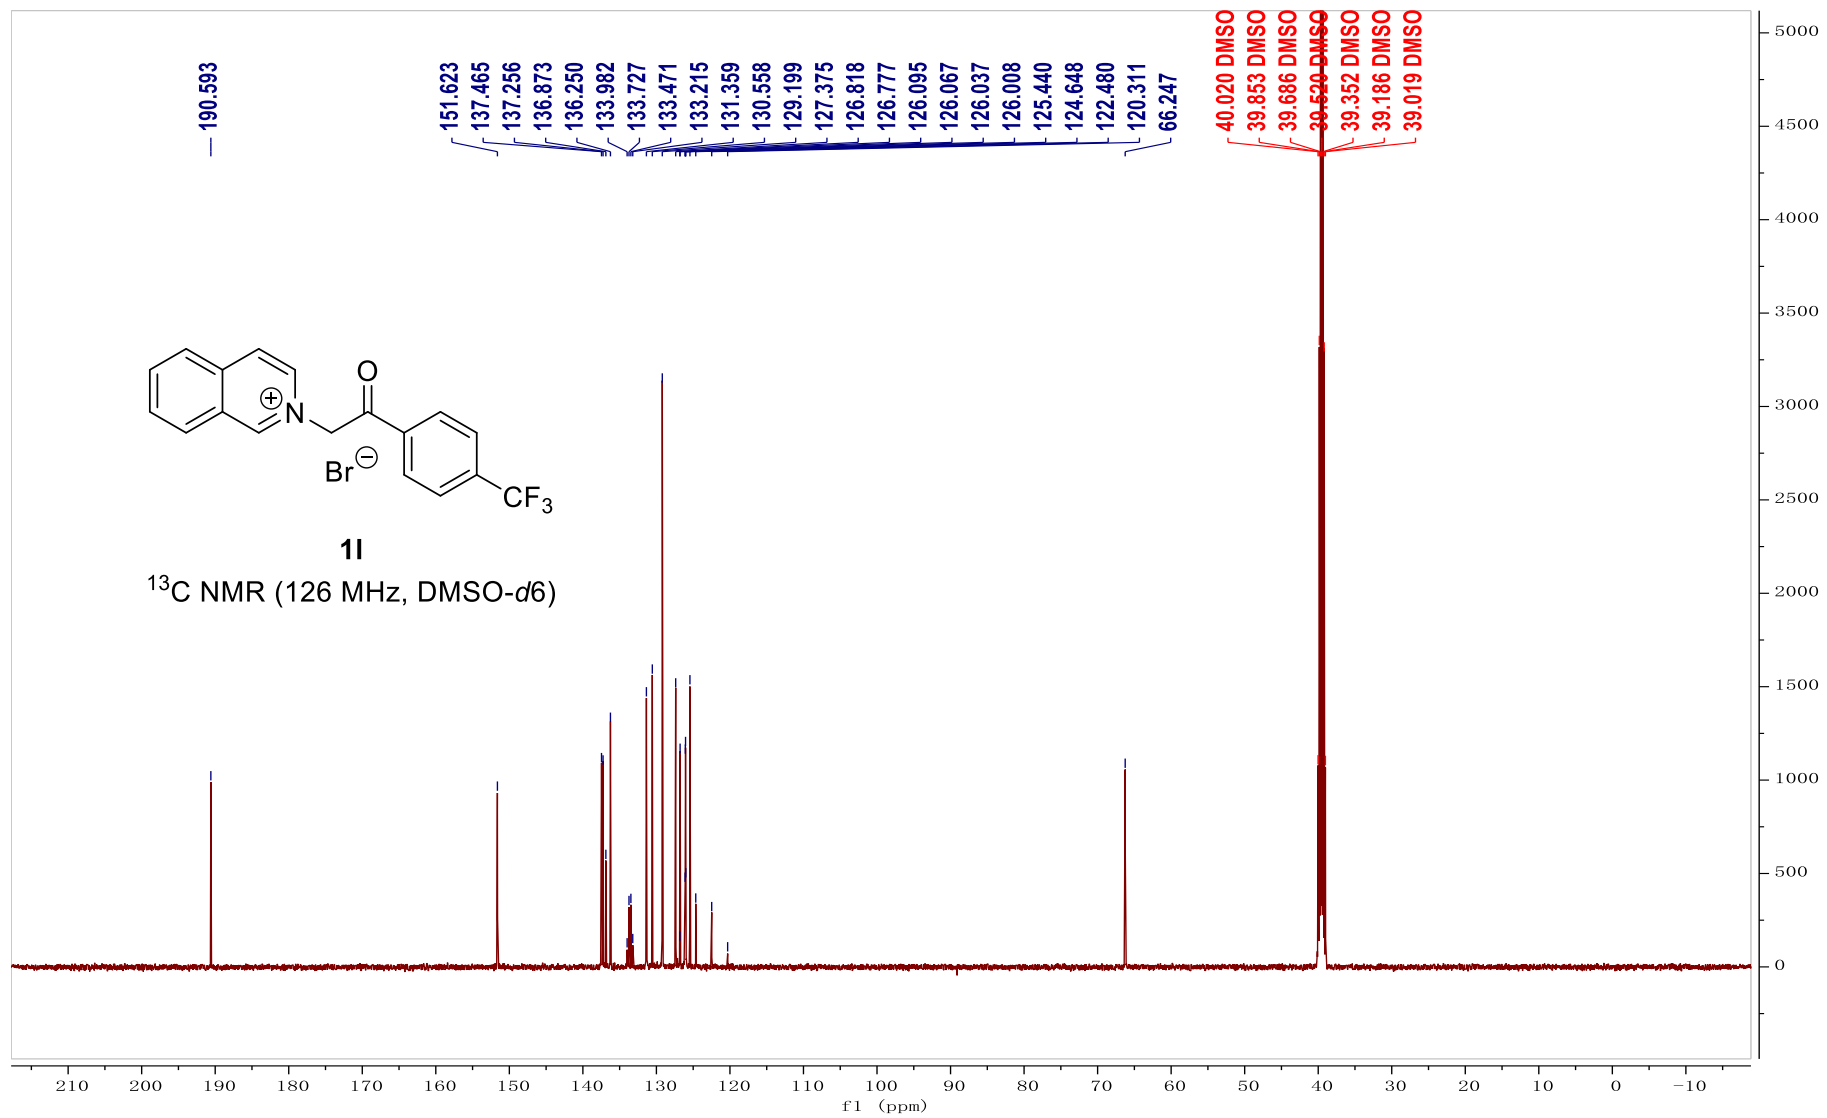

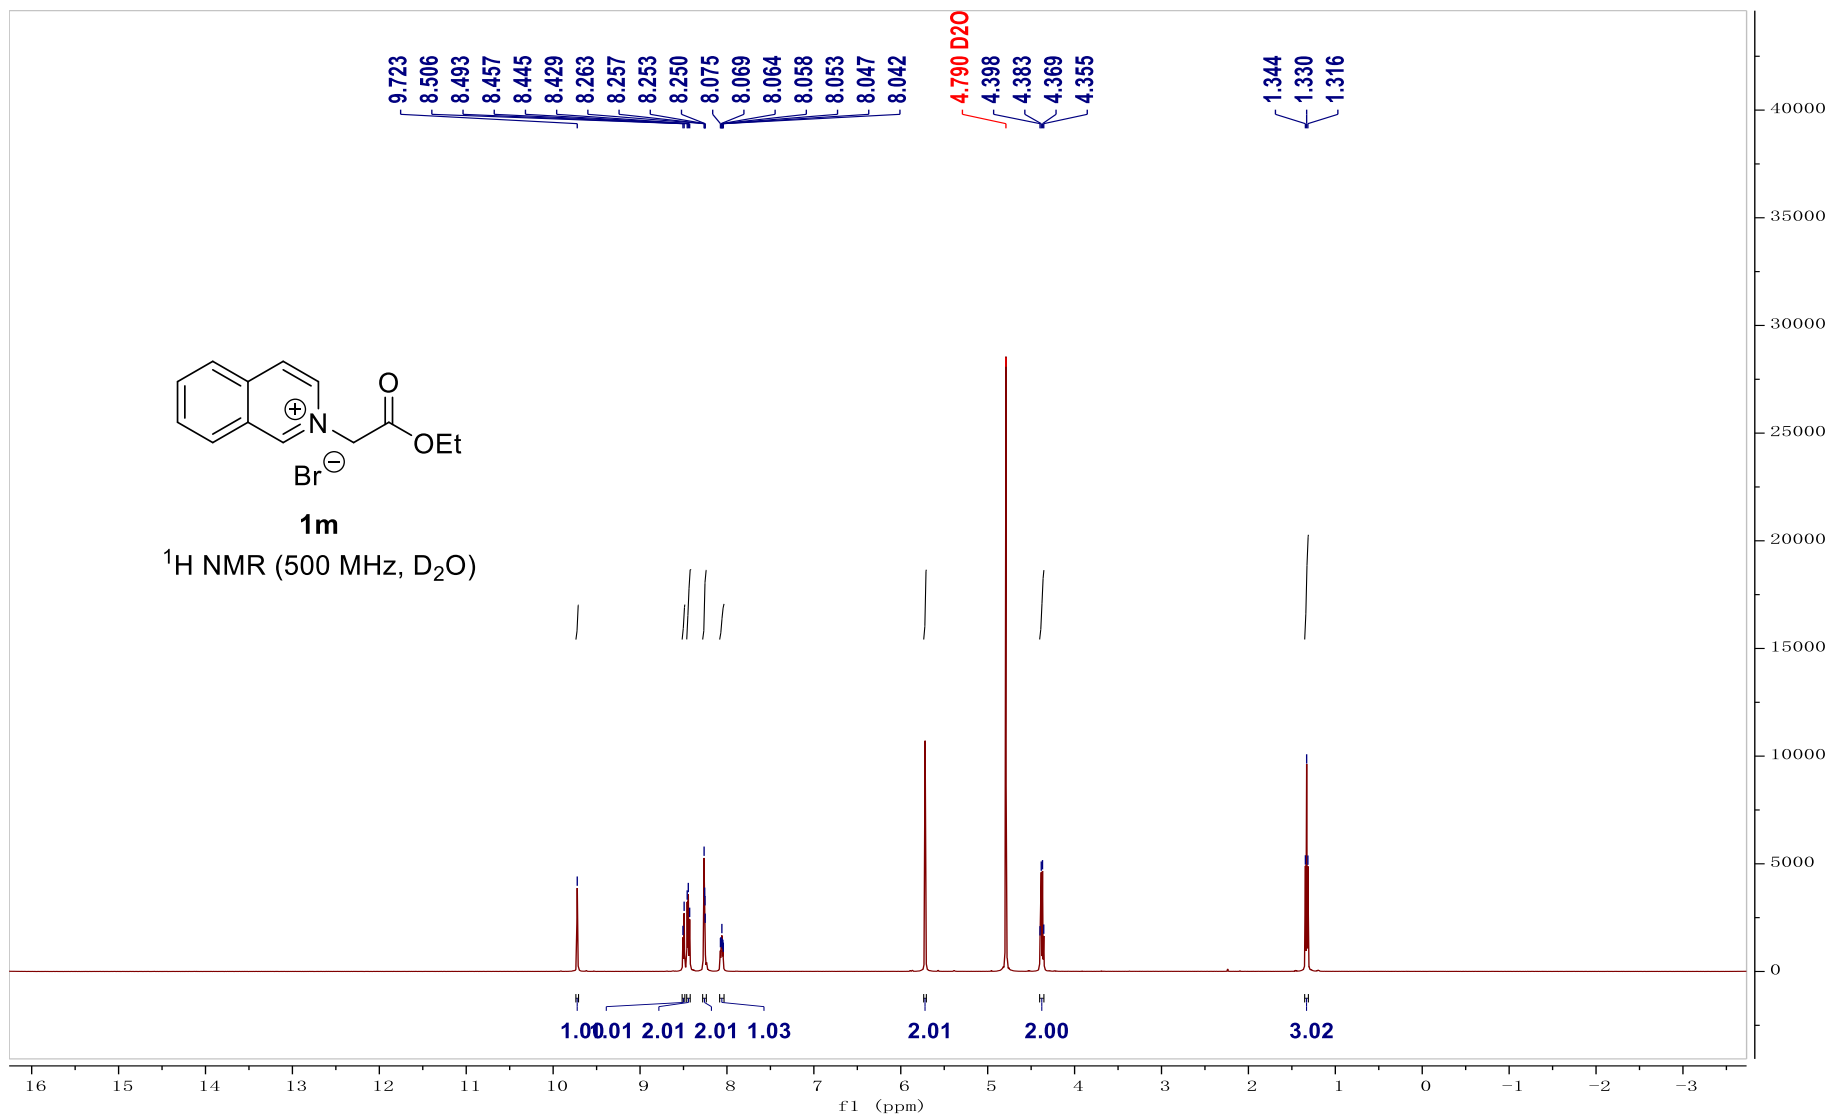

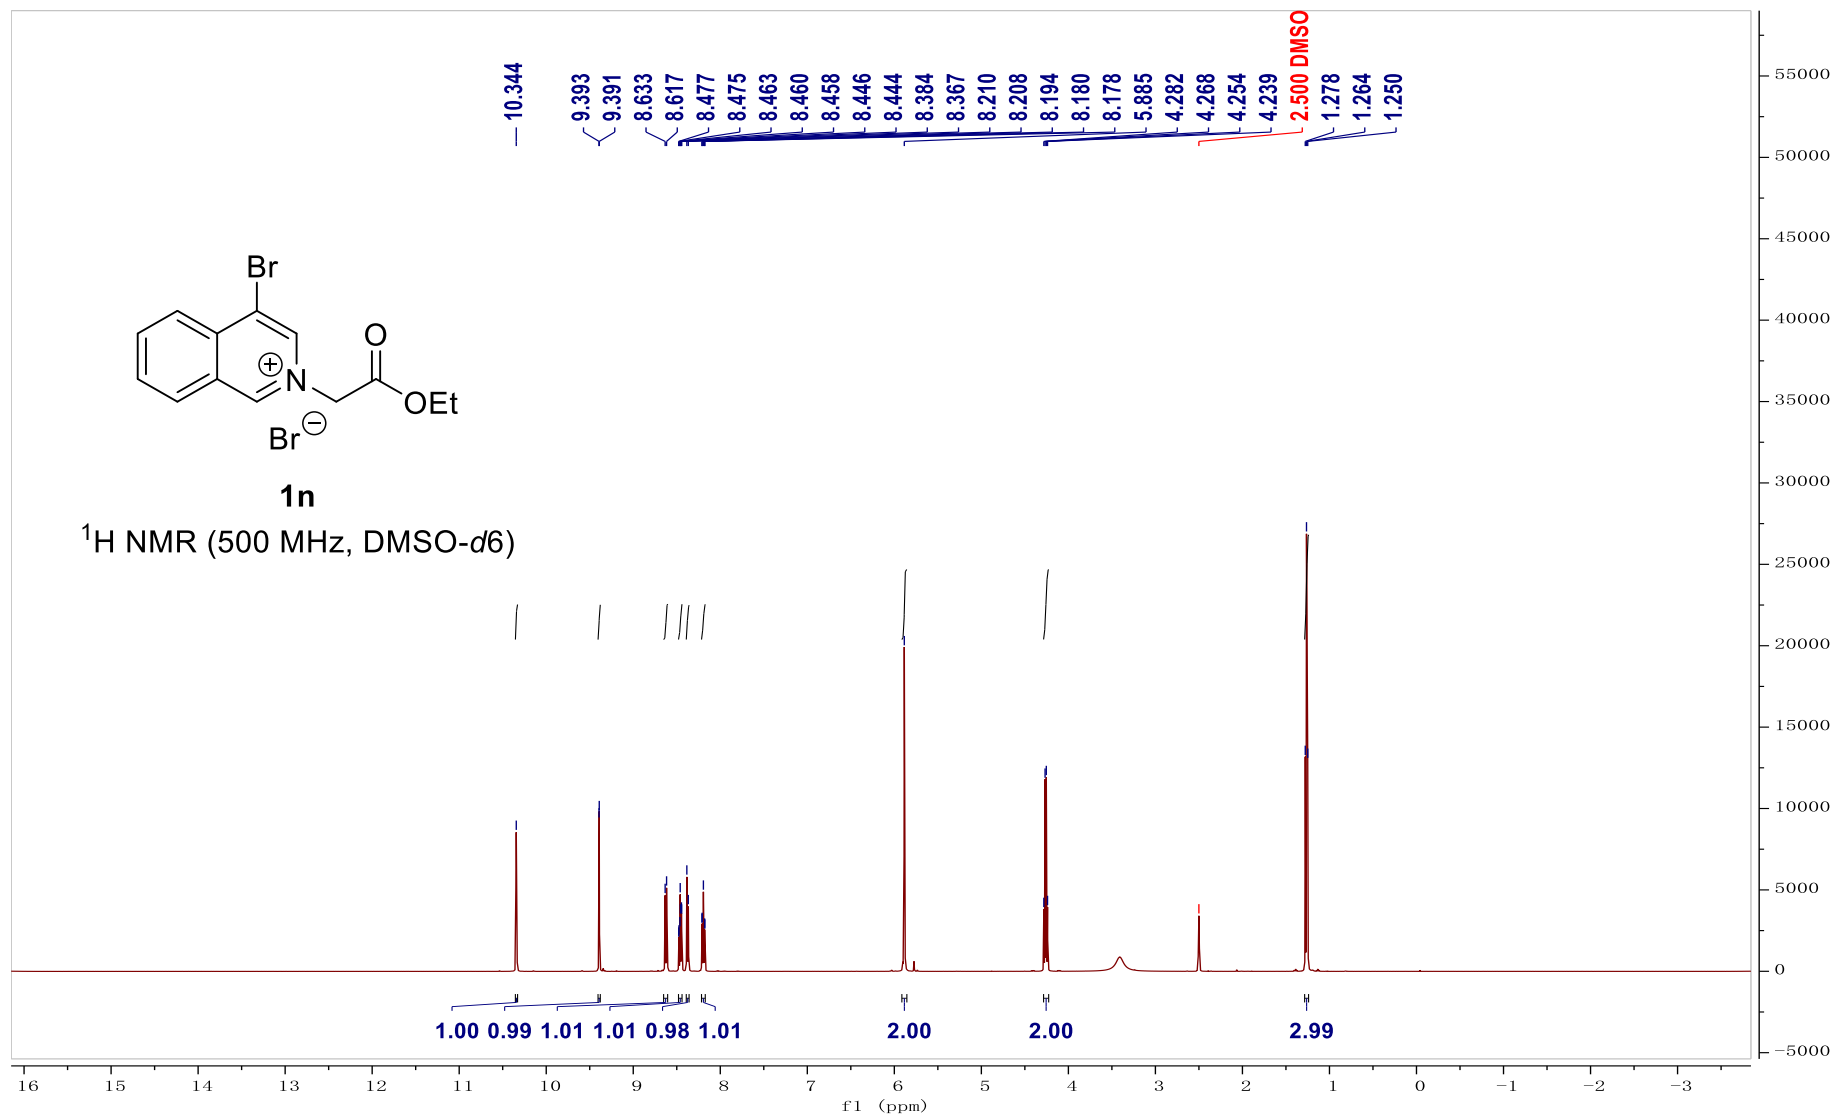

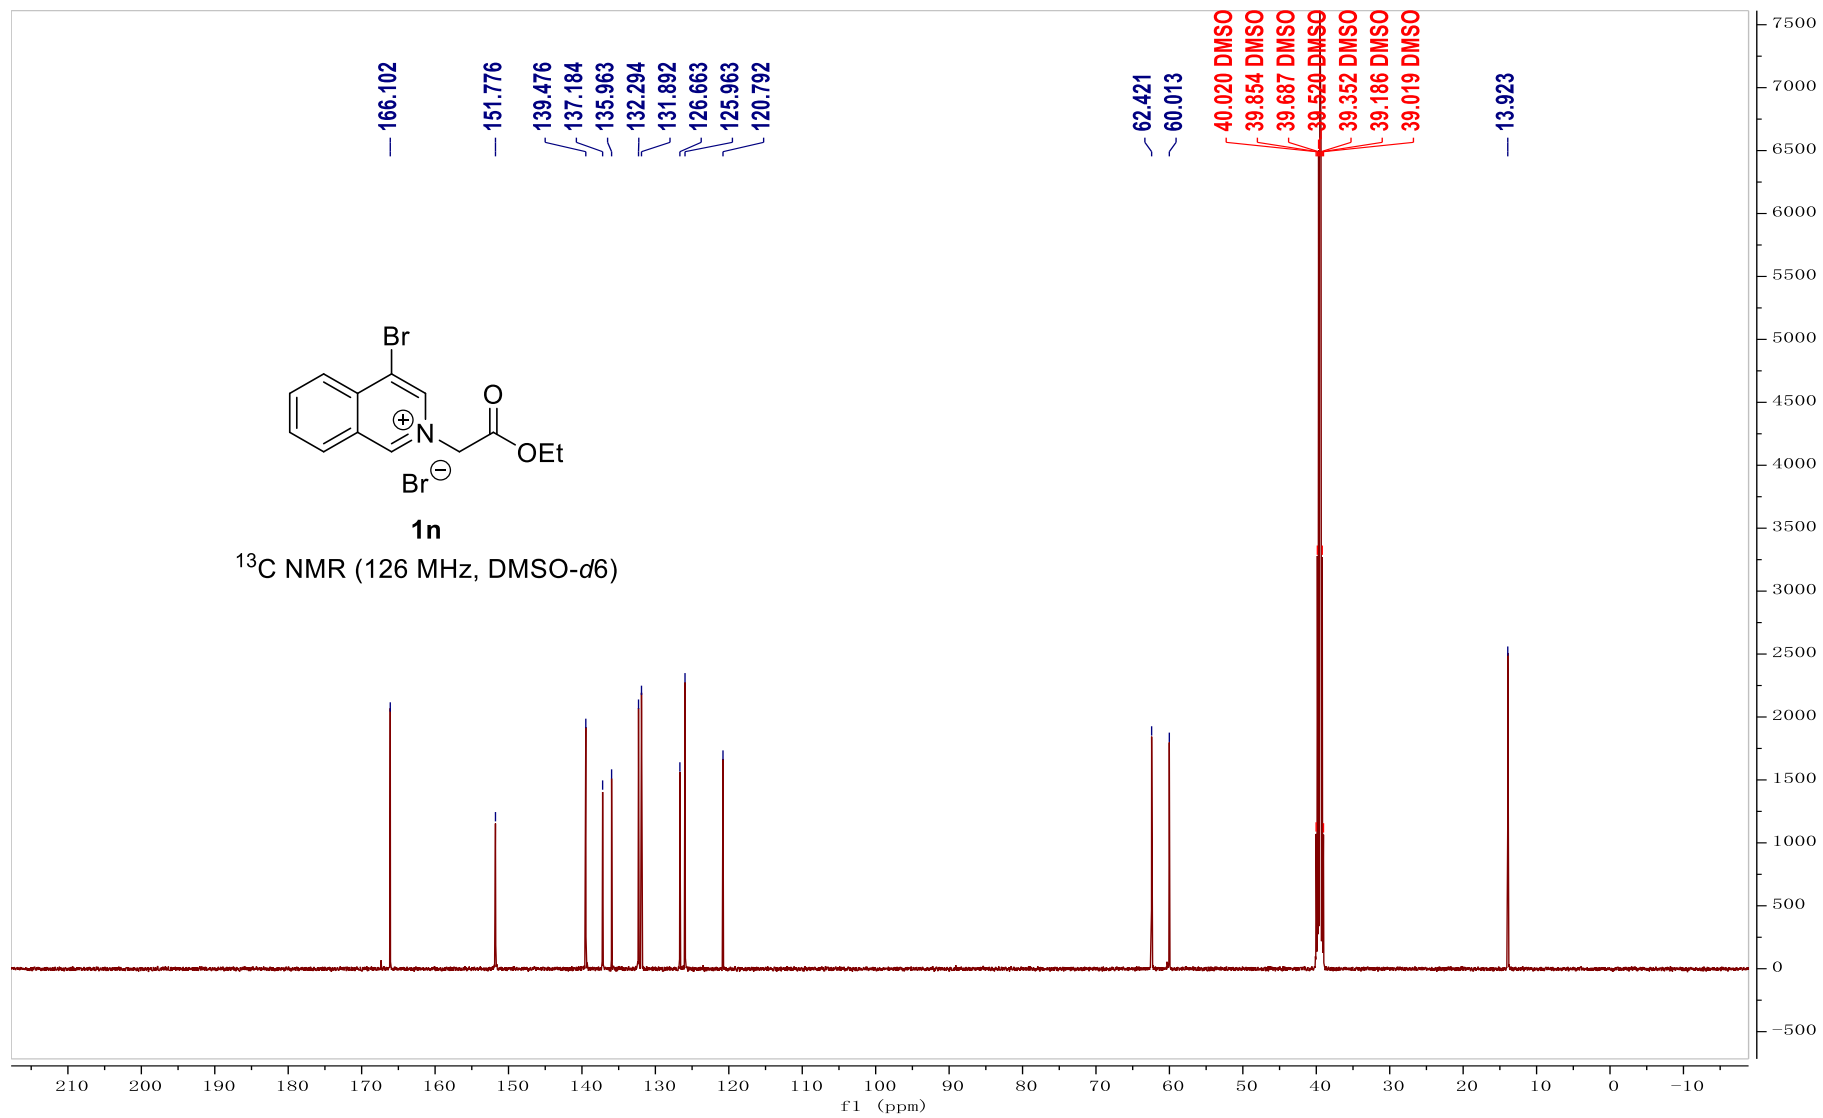

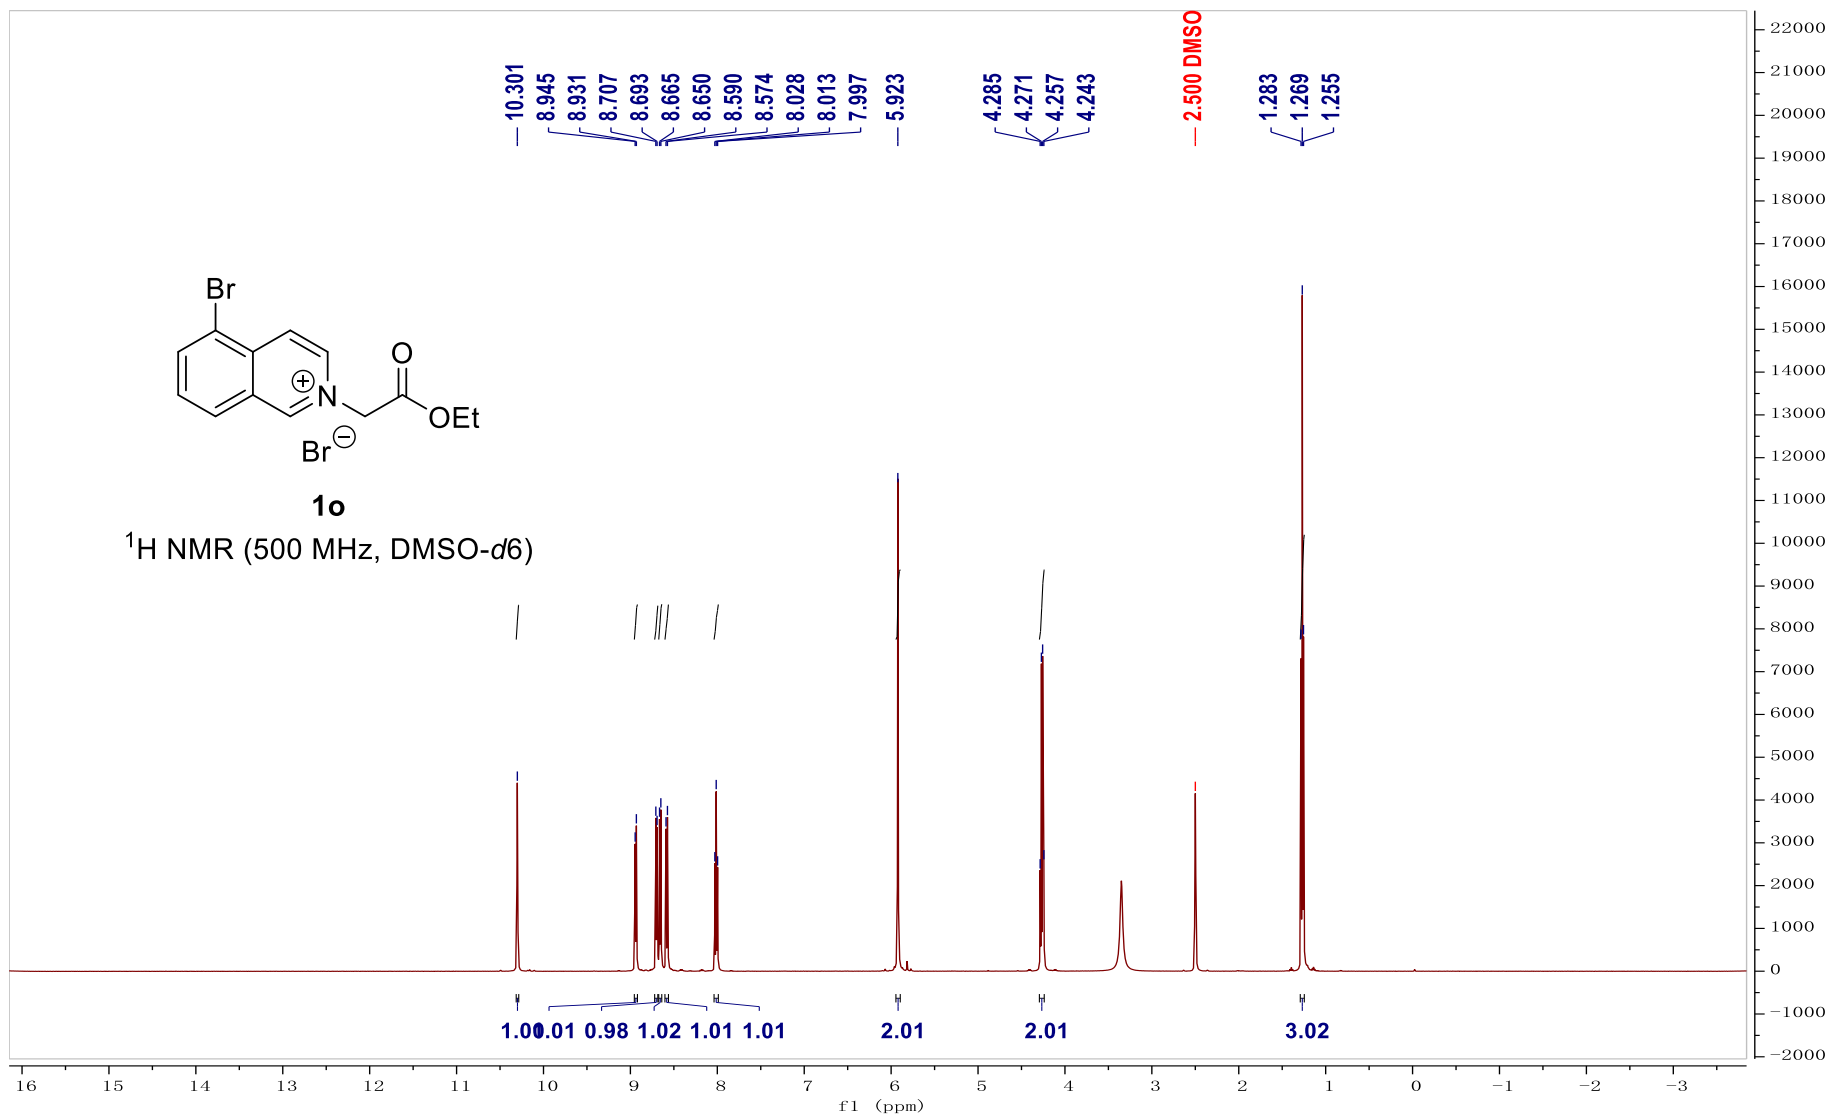

S75

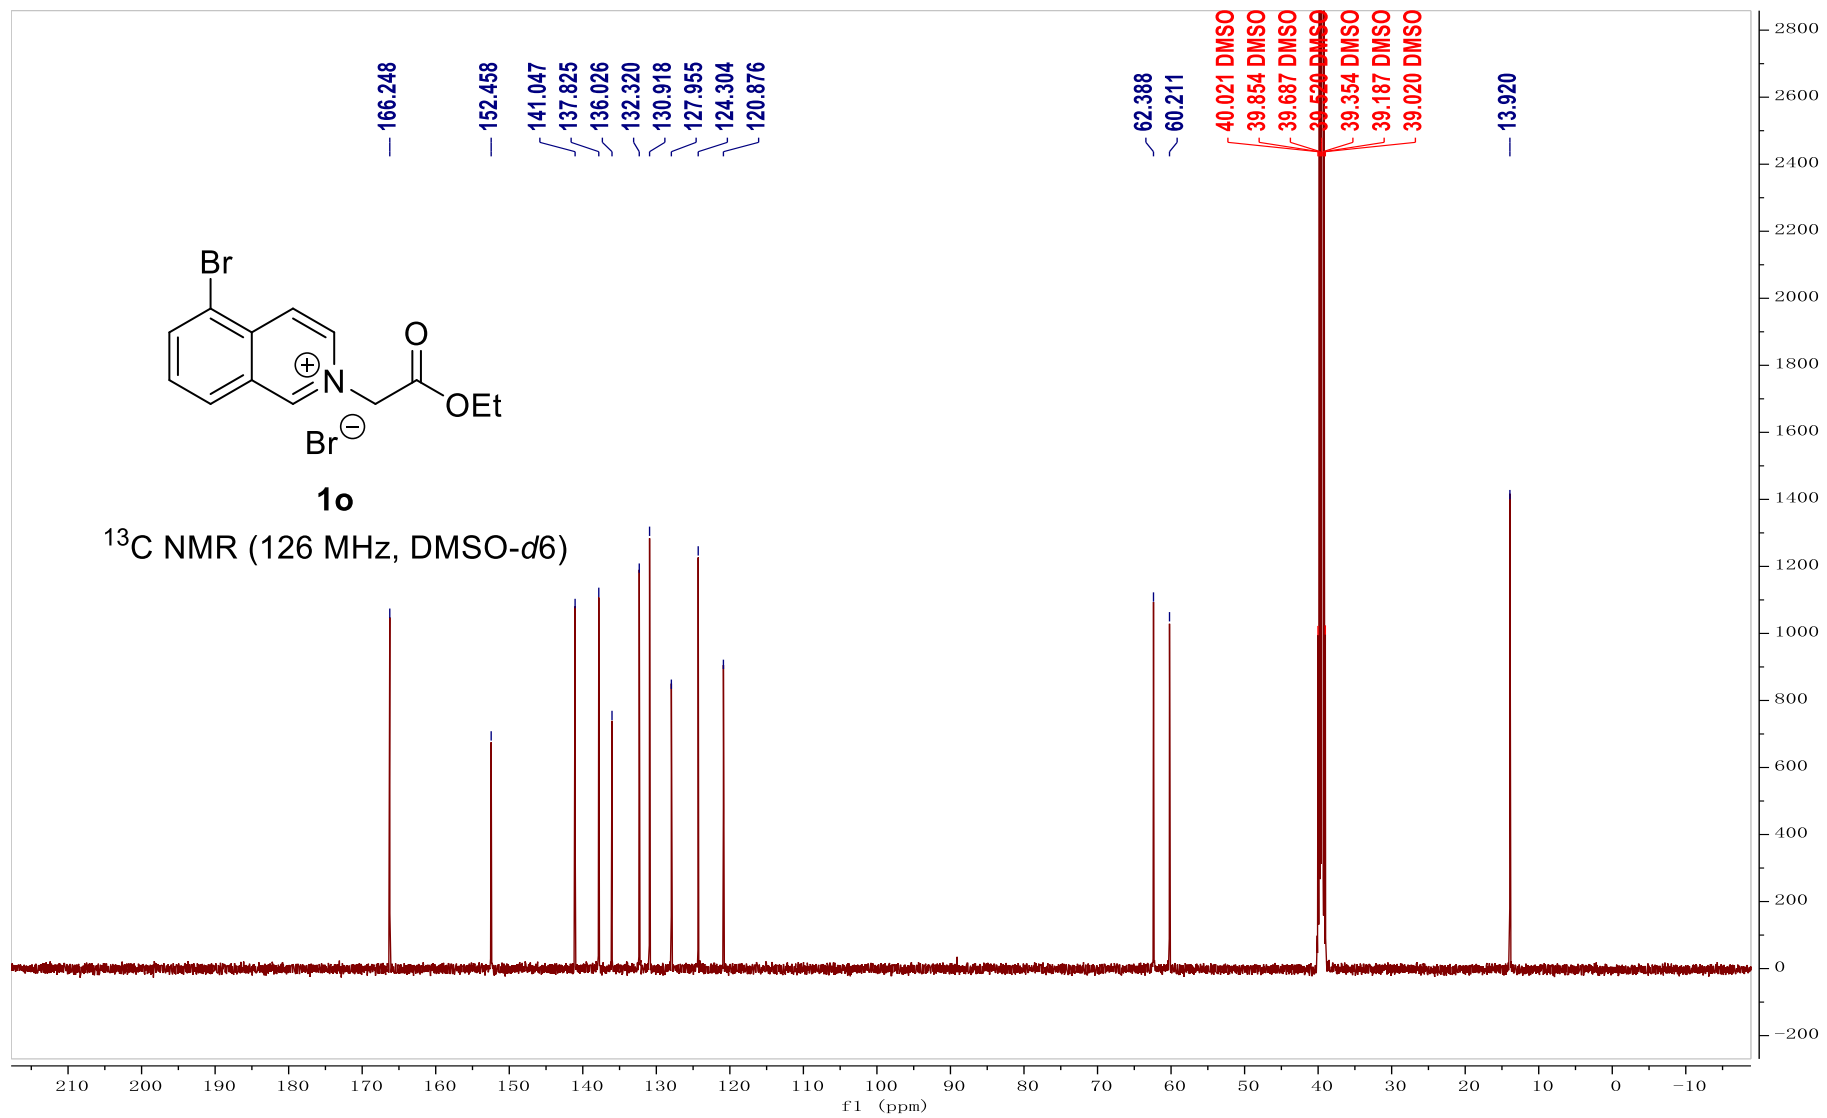

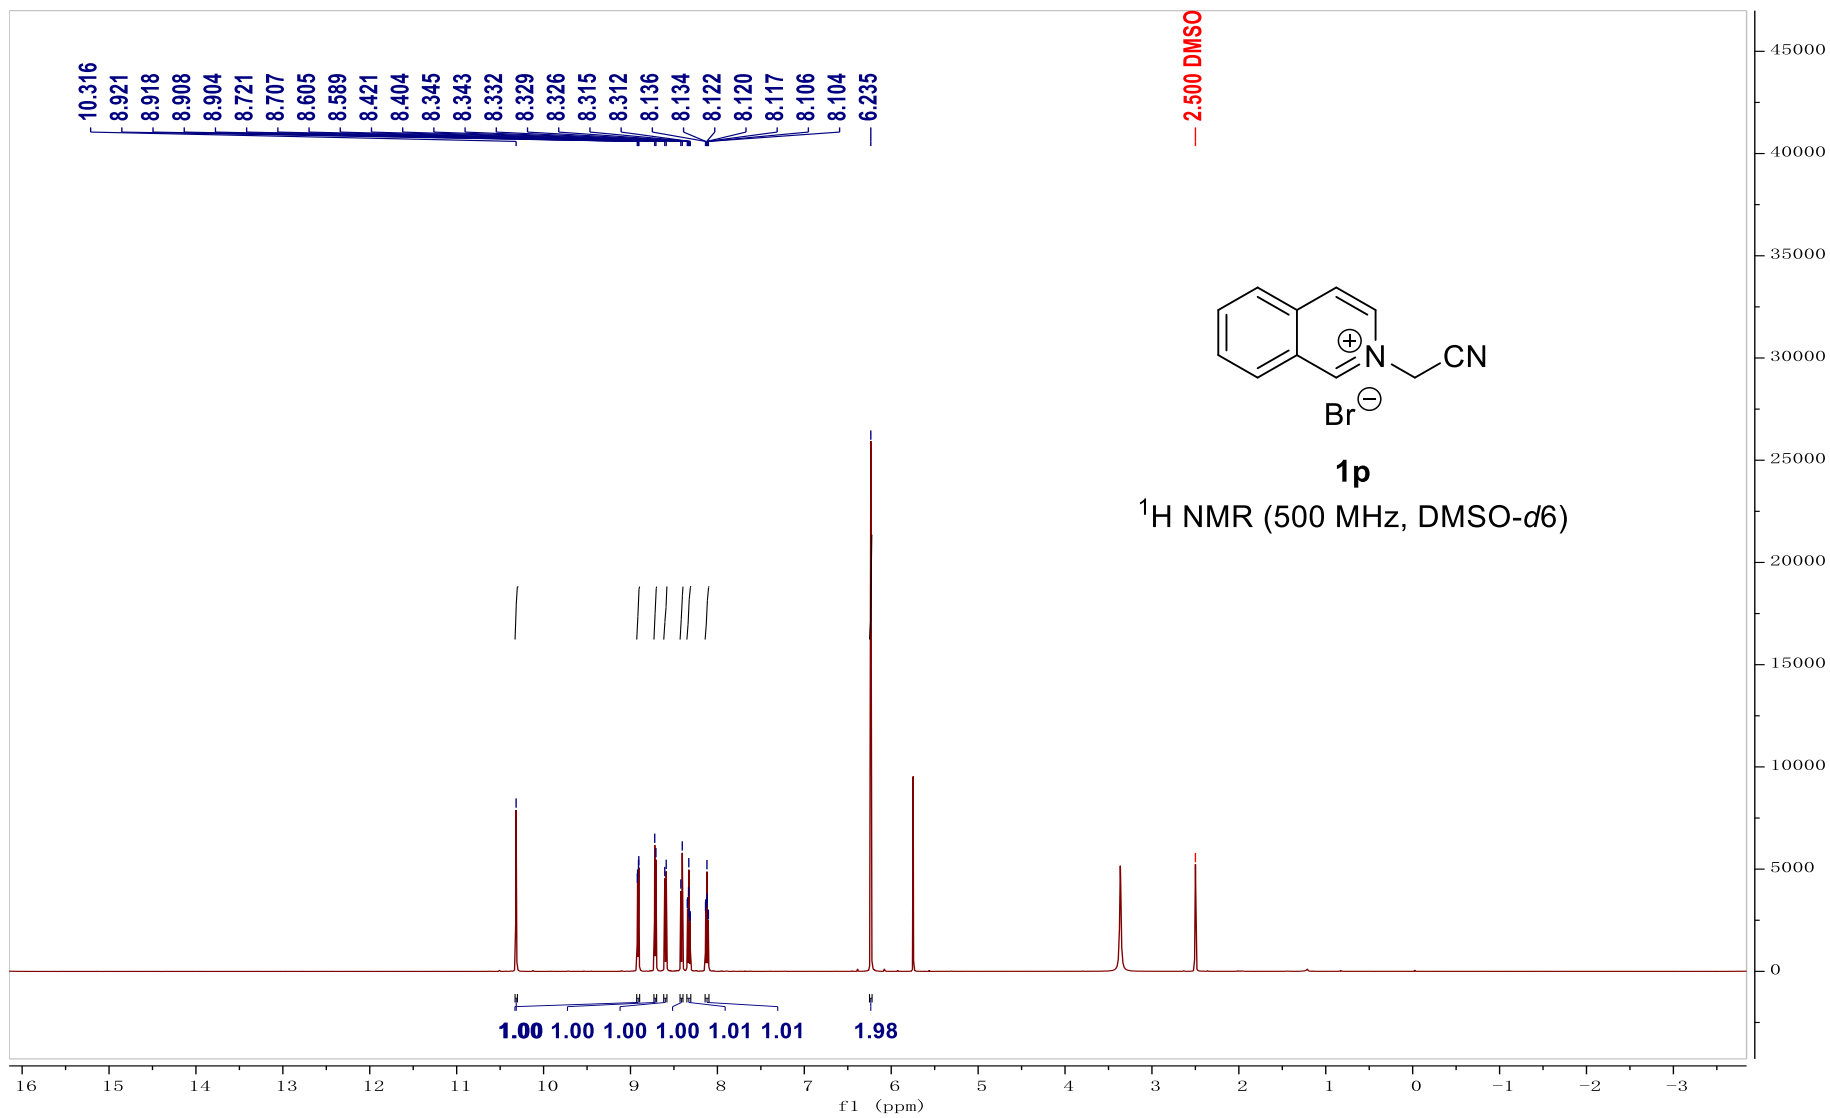

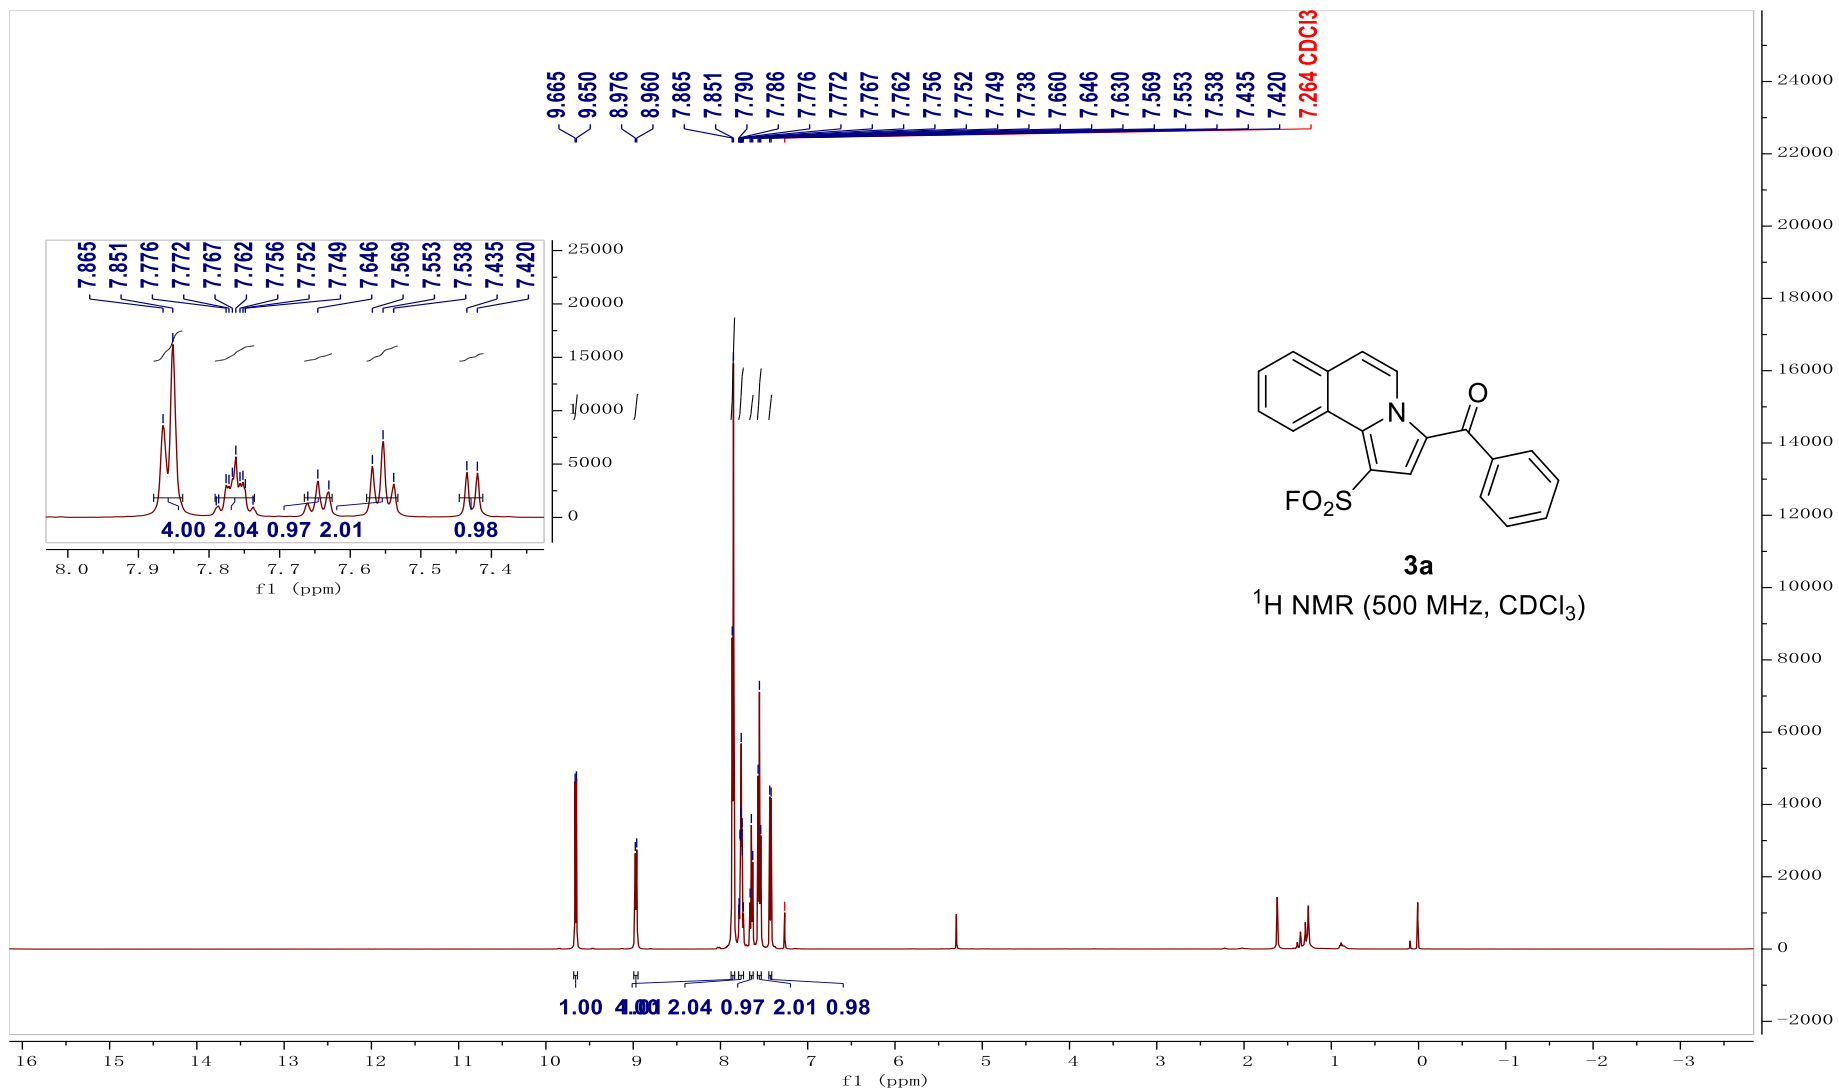



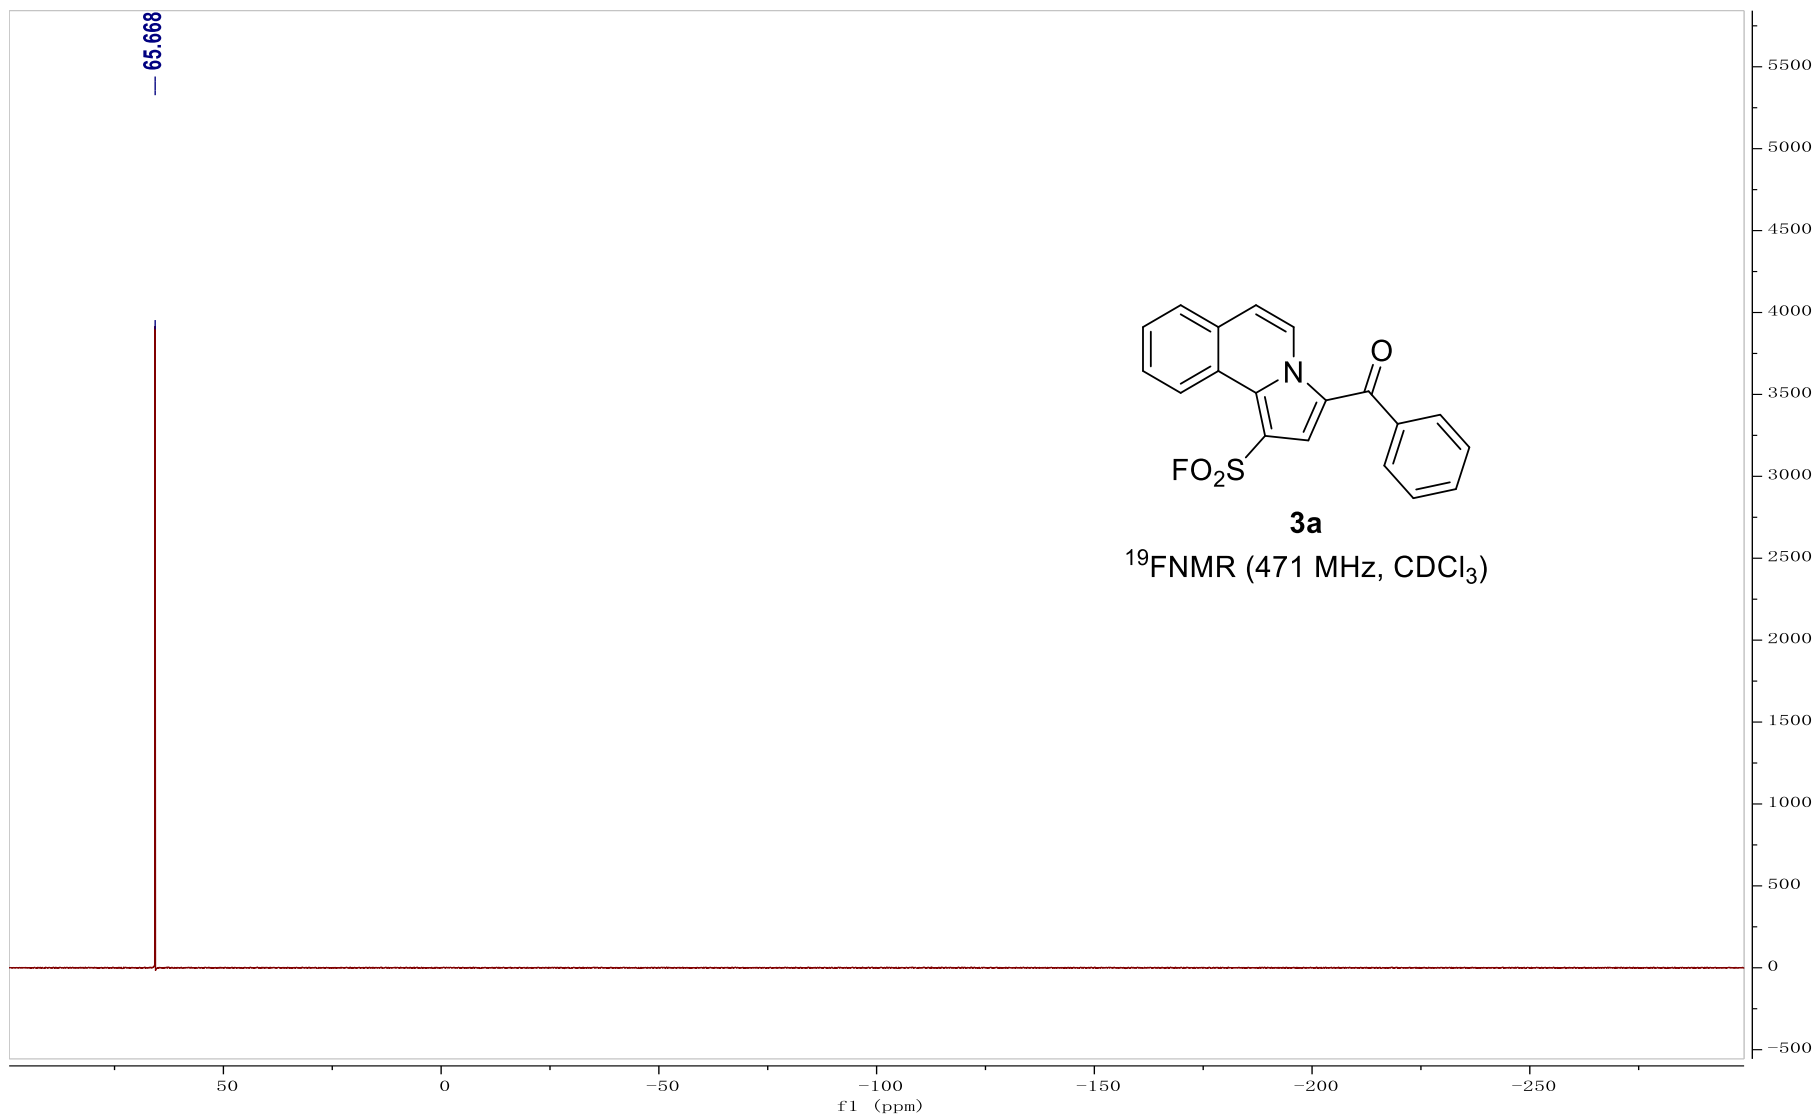

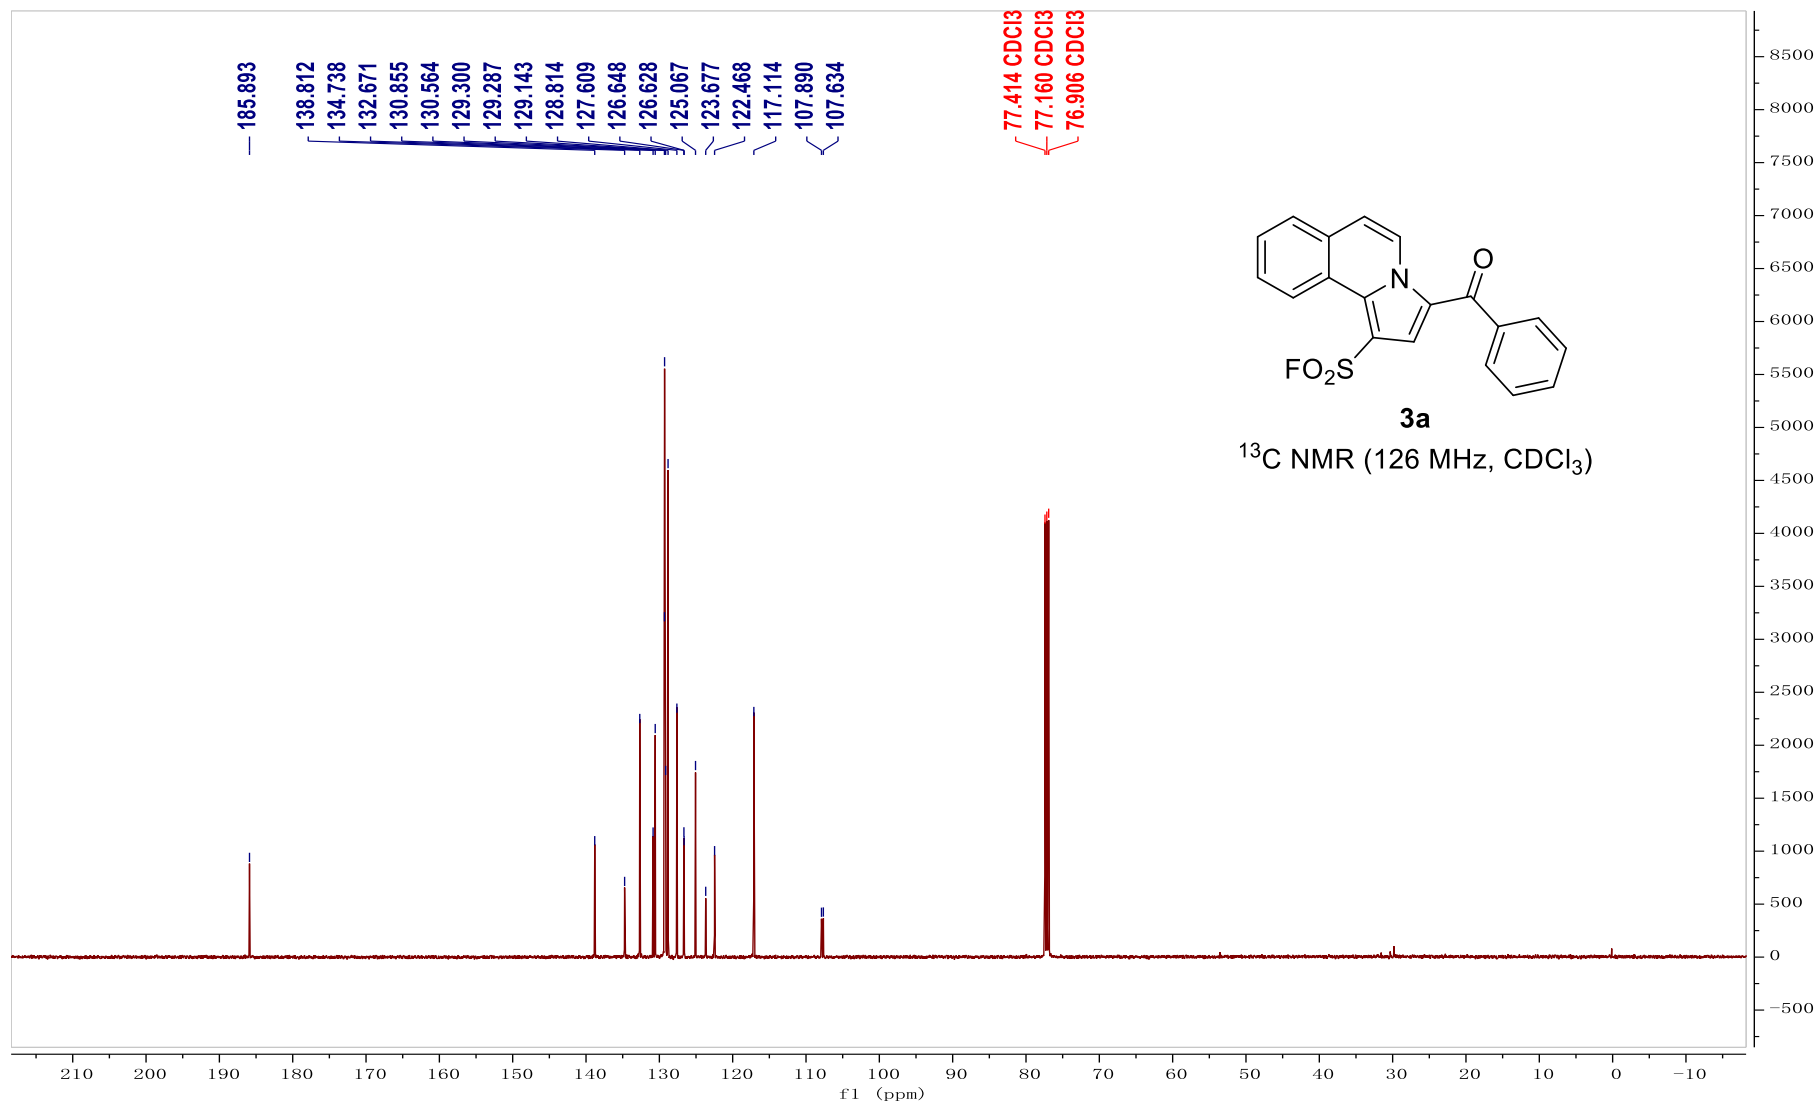

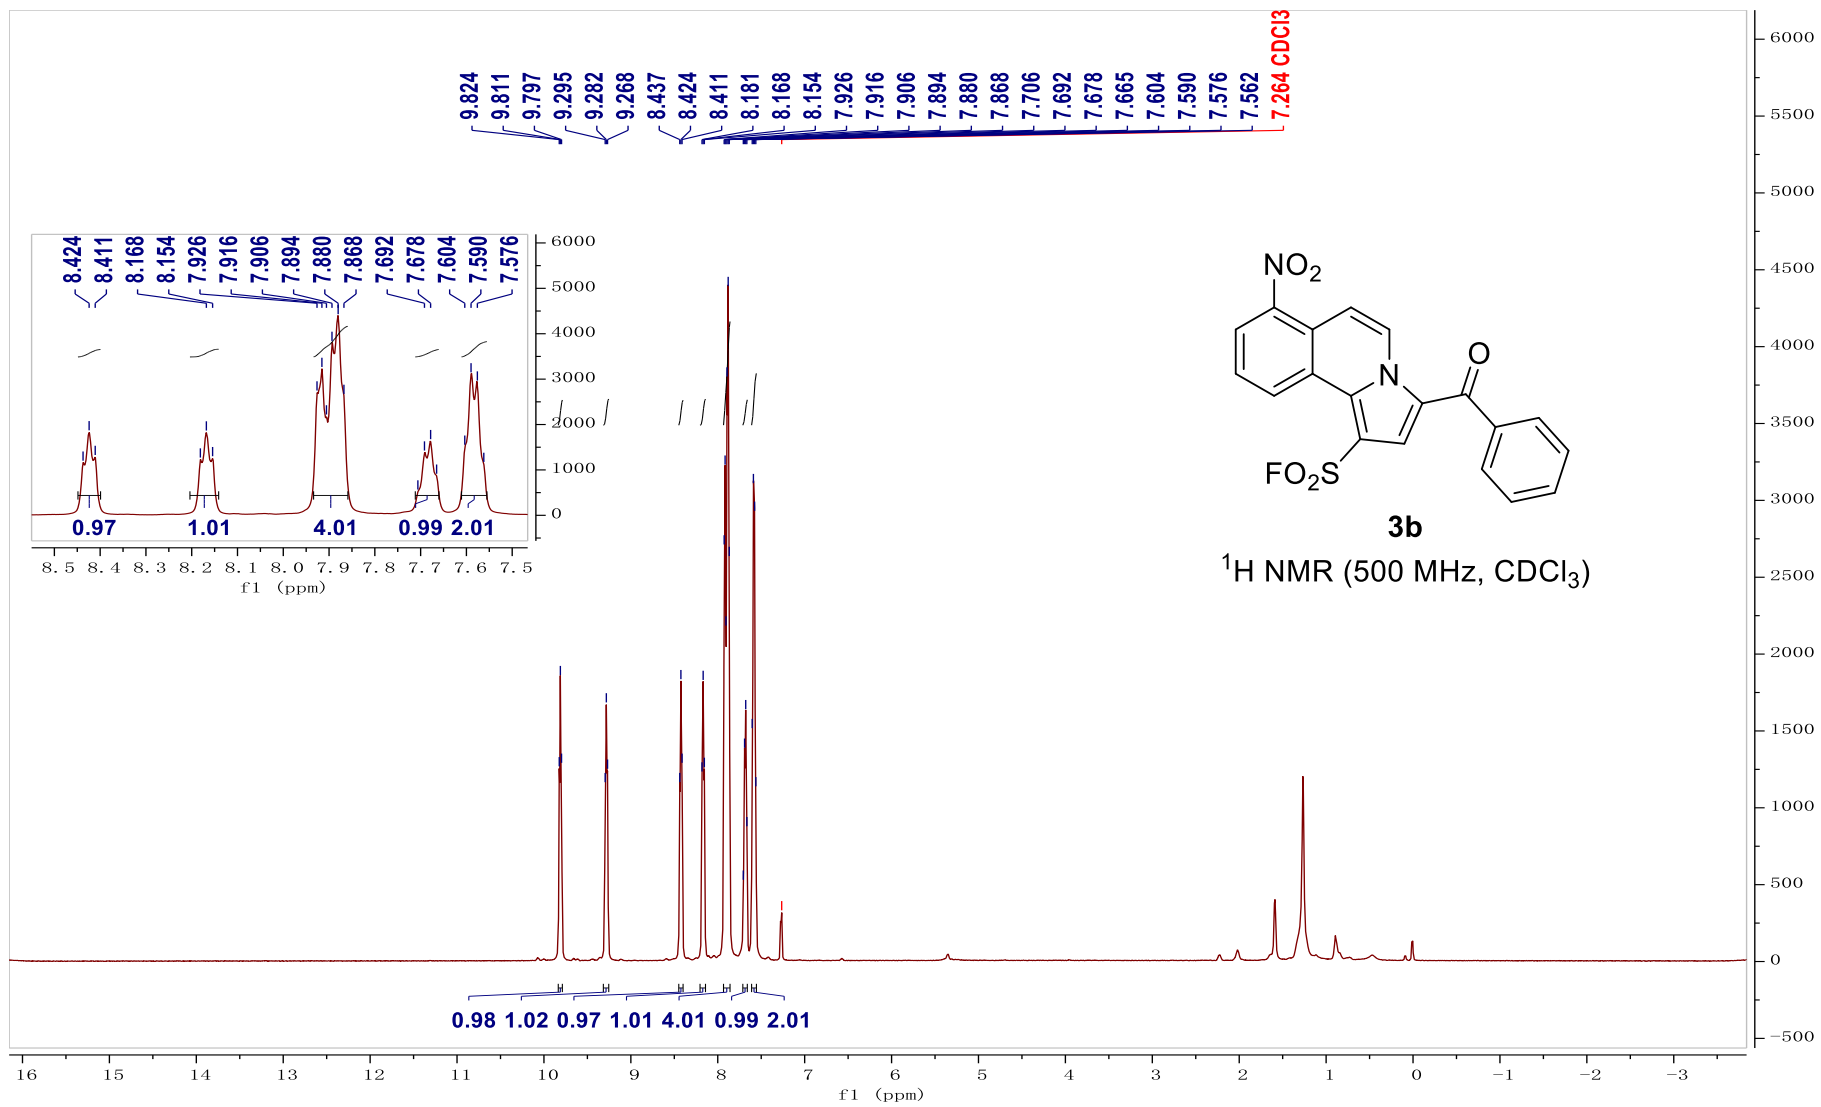

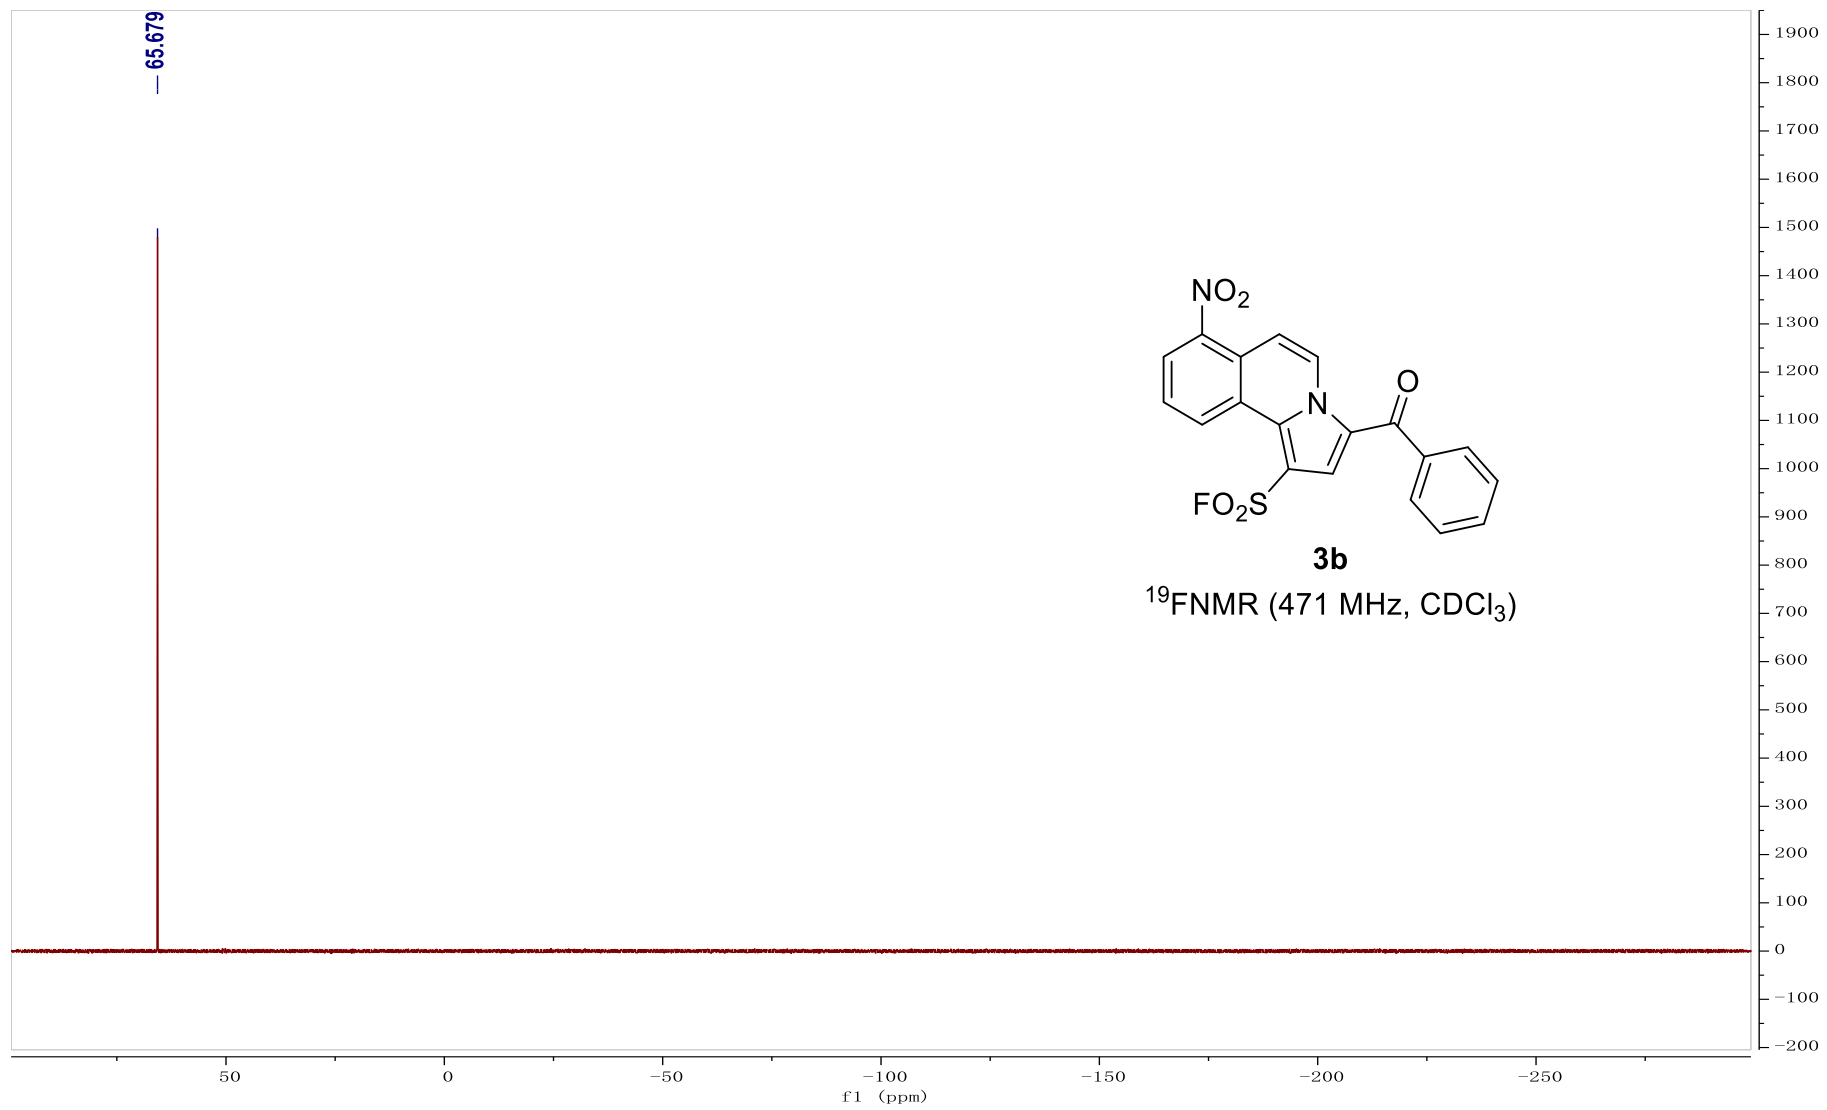

S82

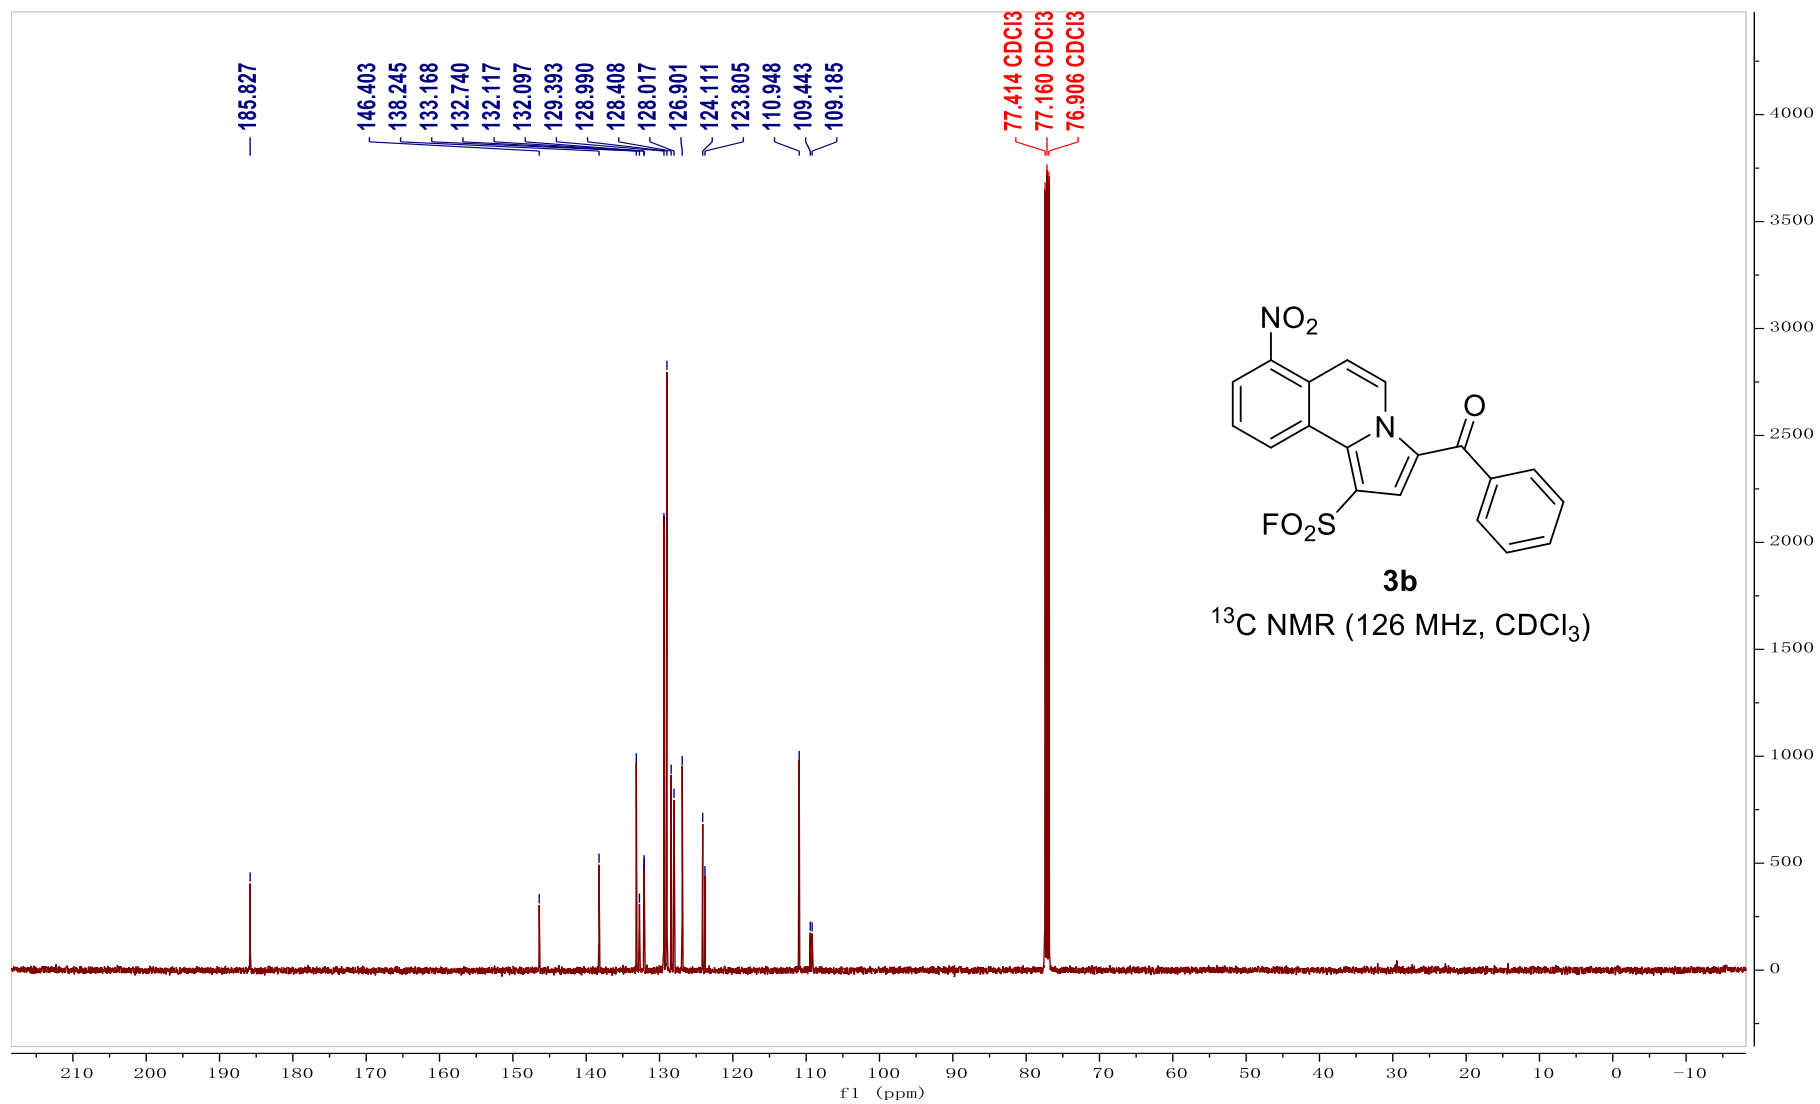

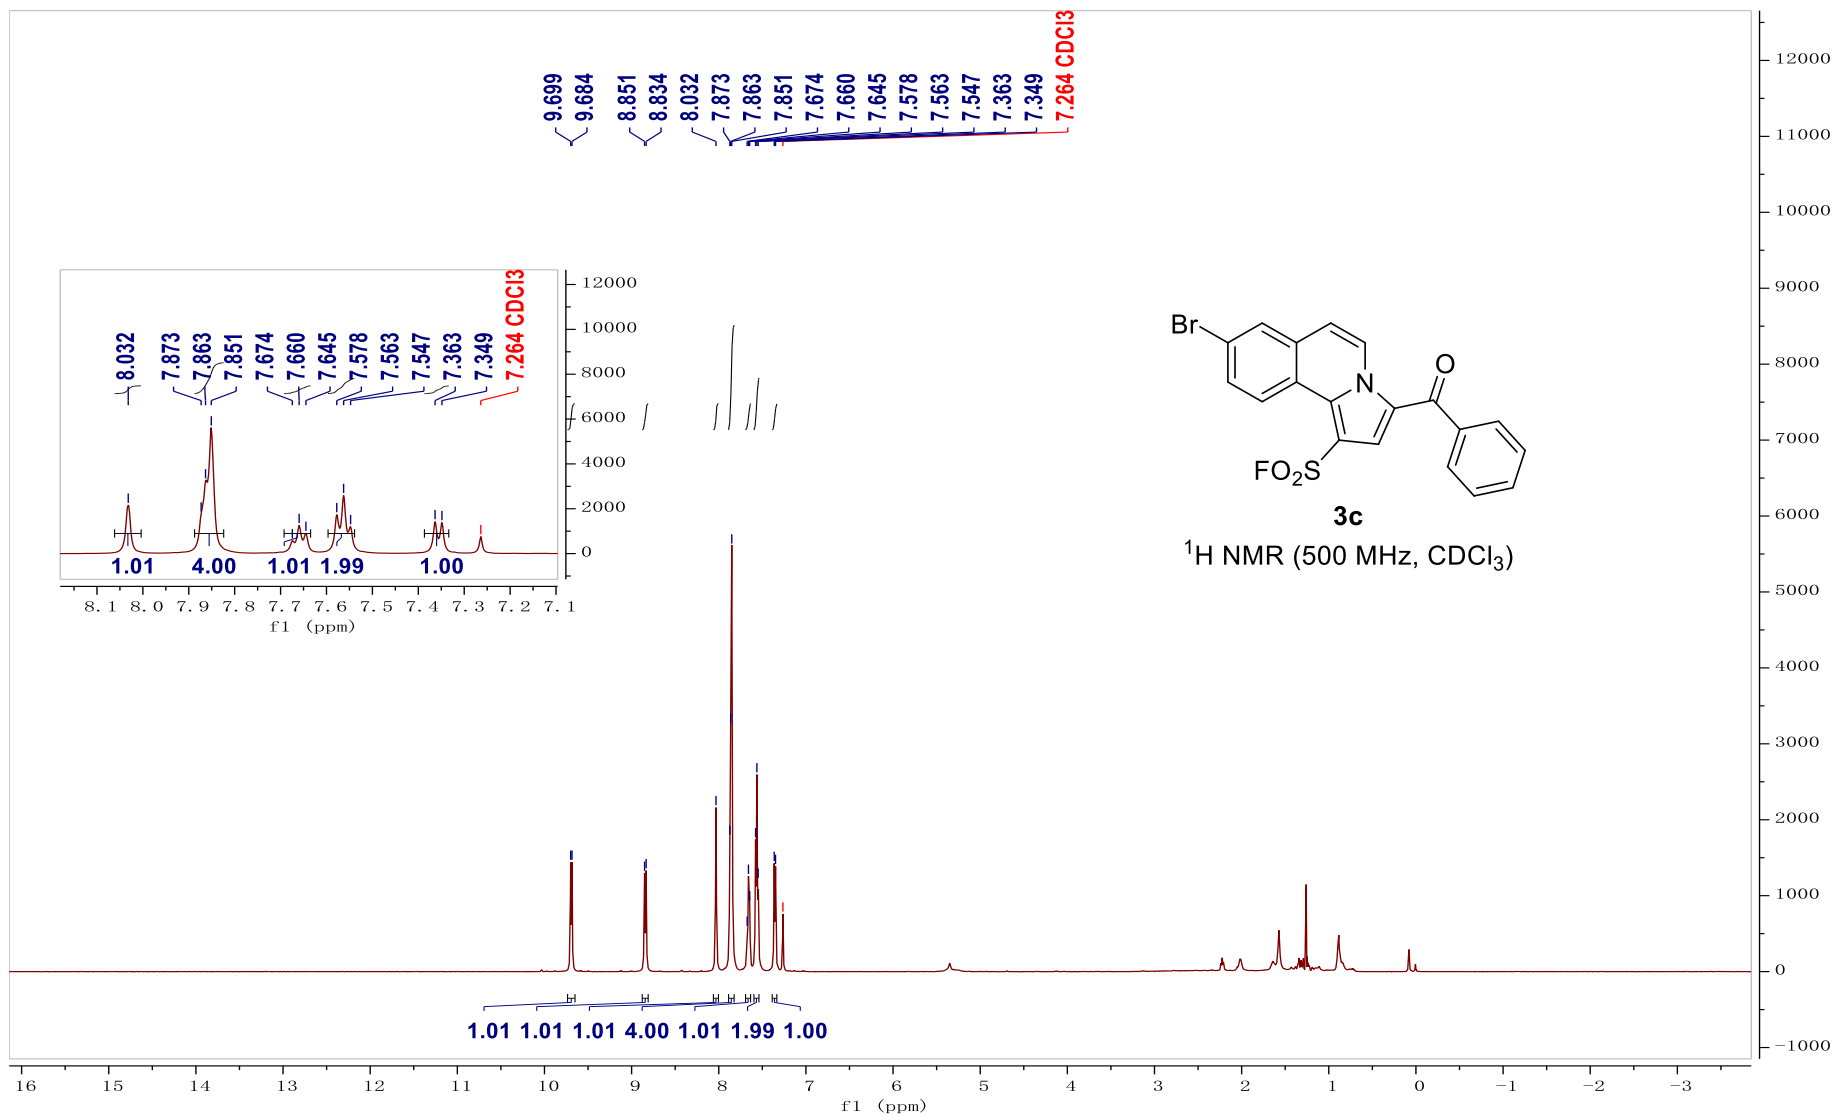

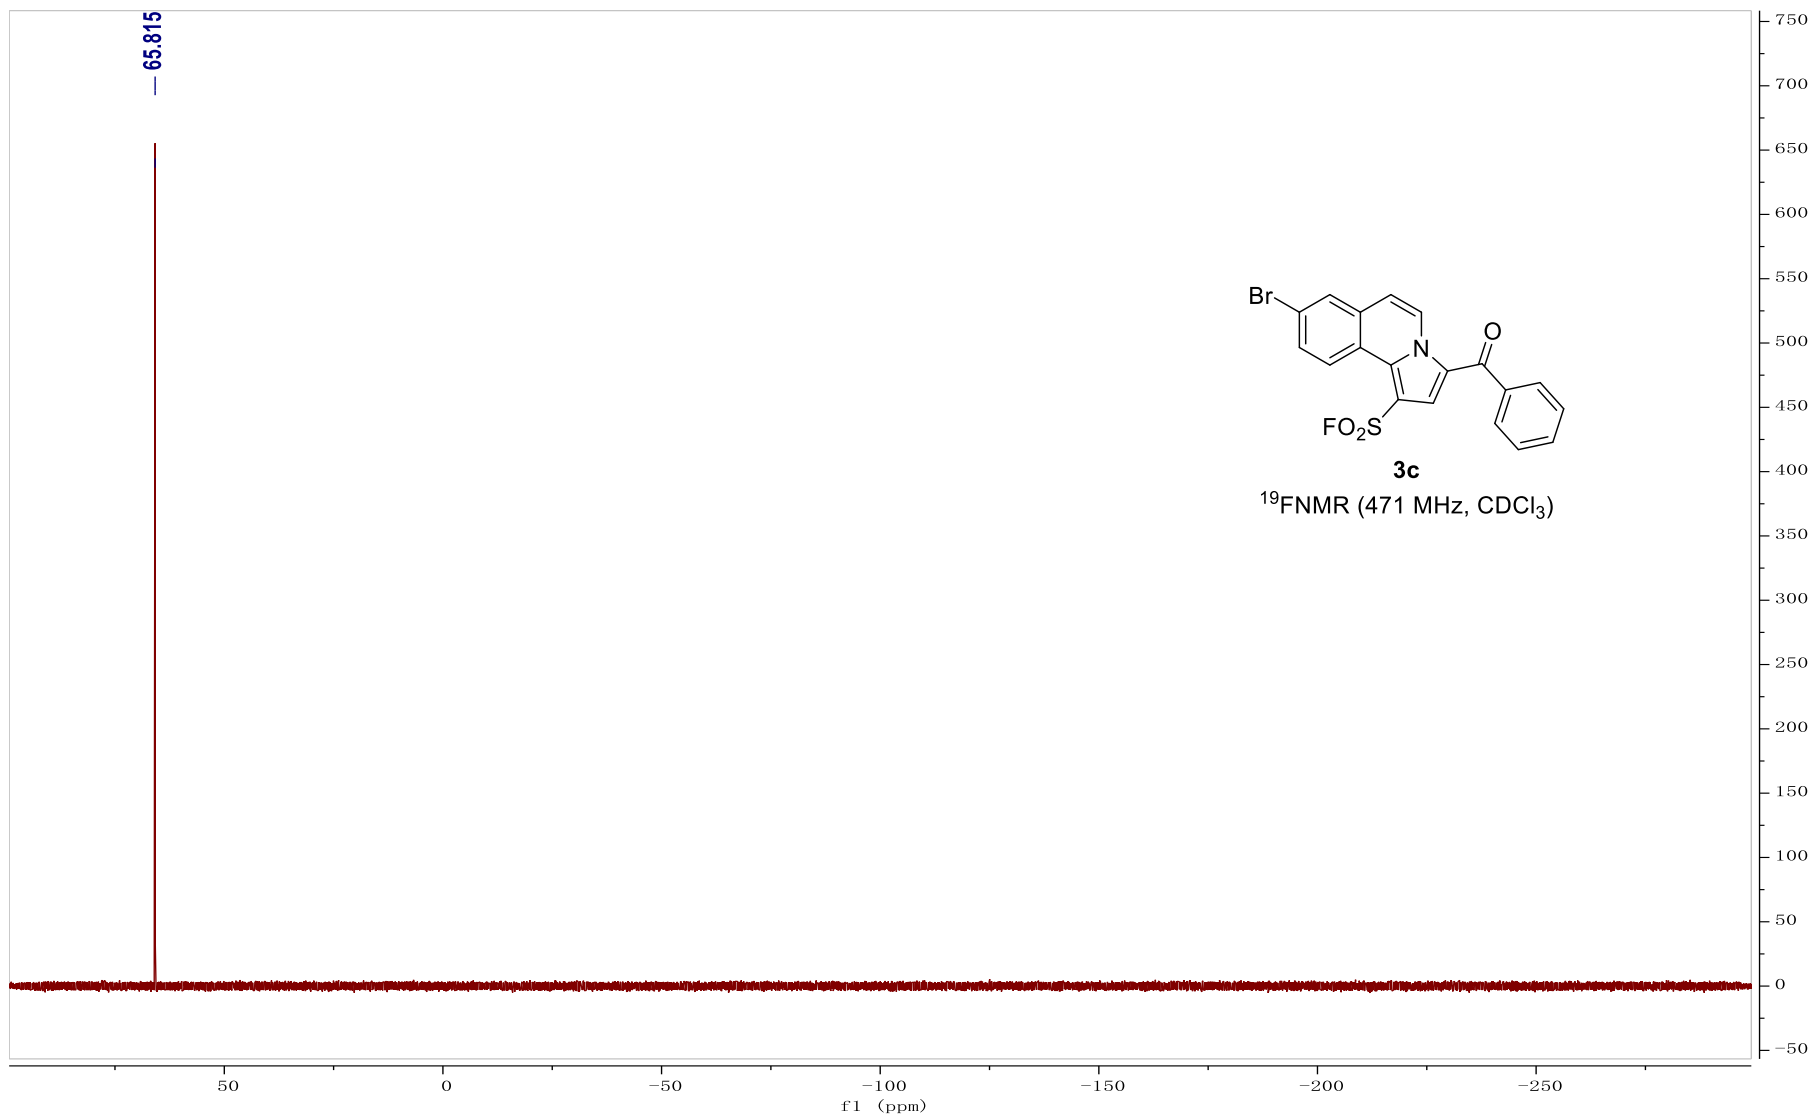

S85

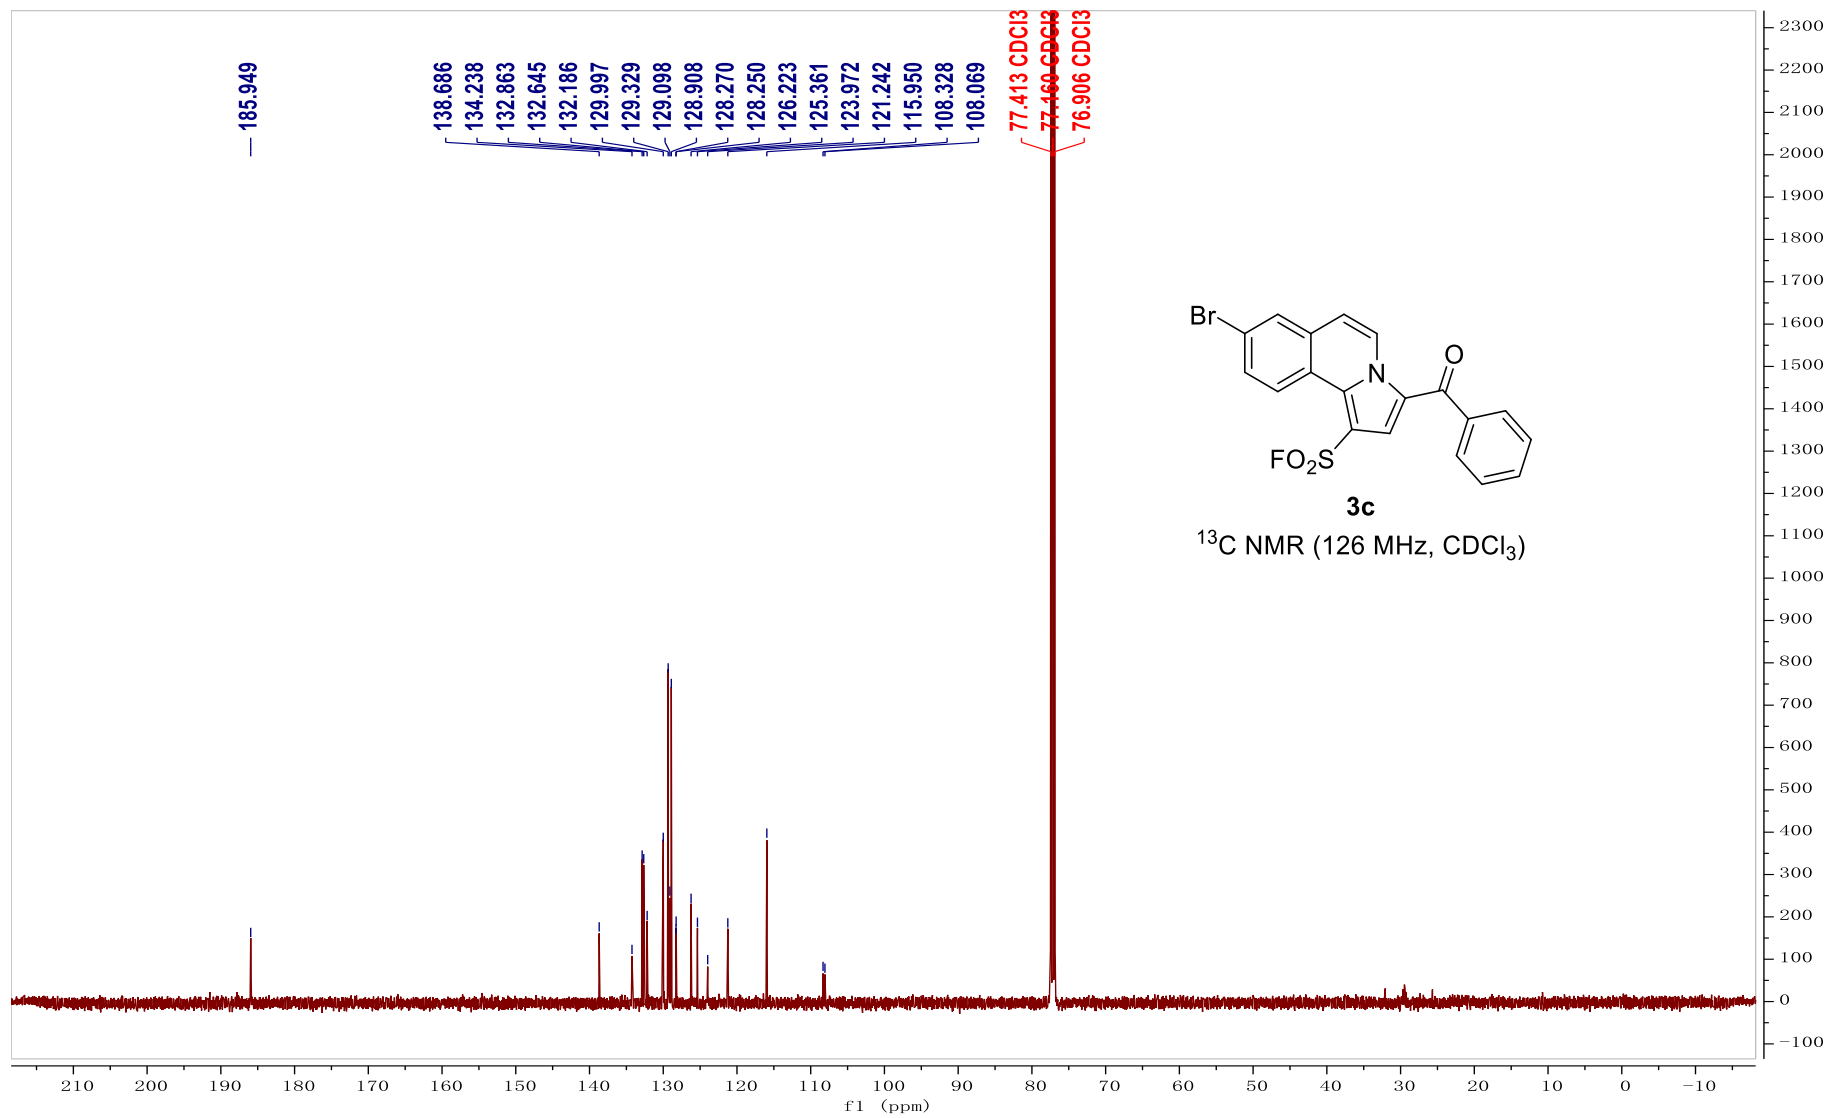



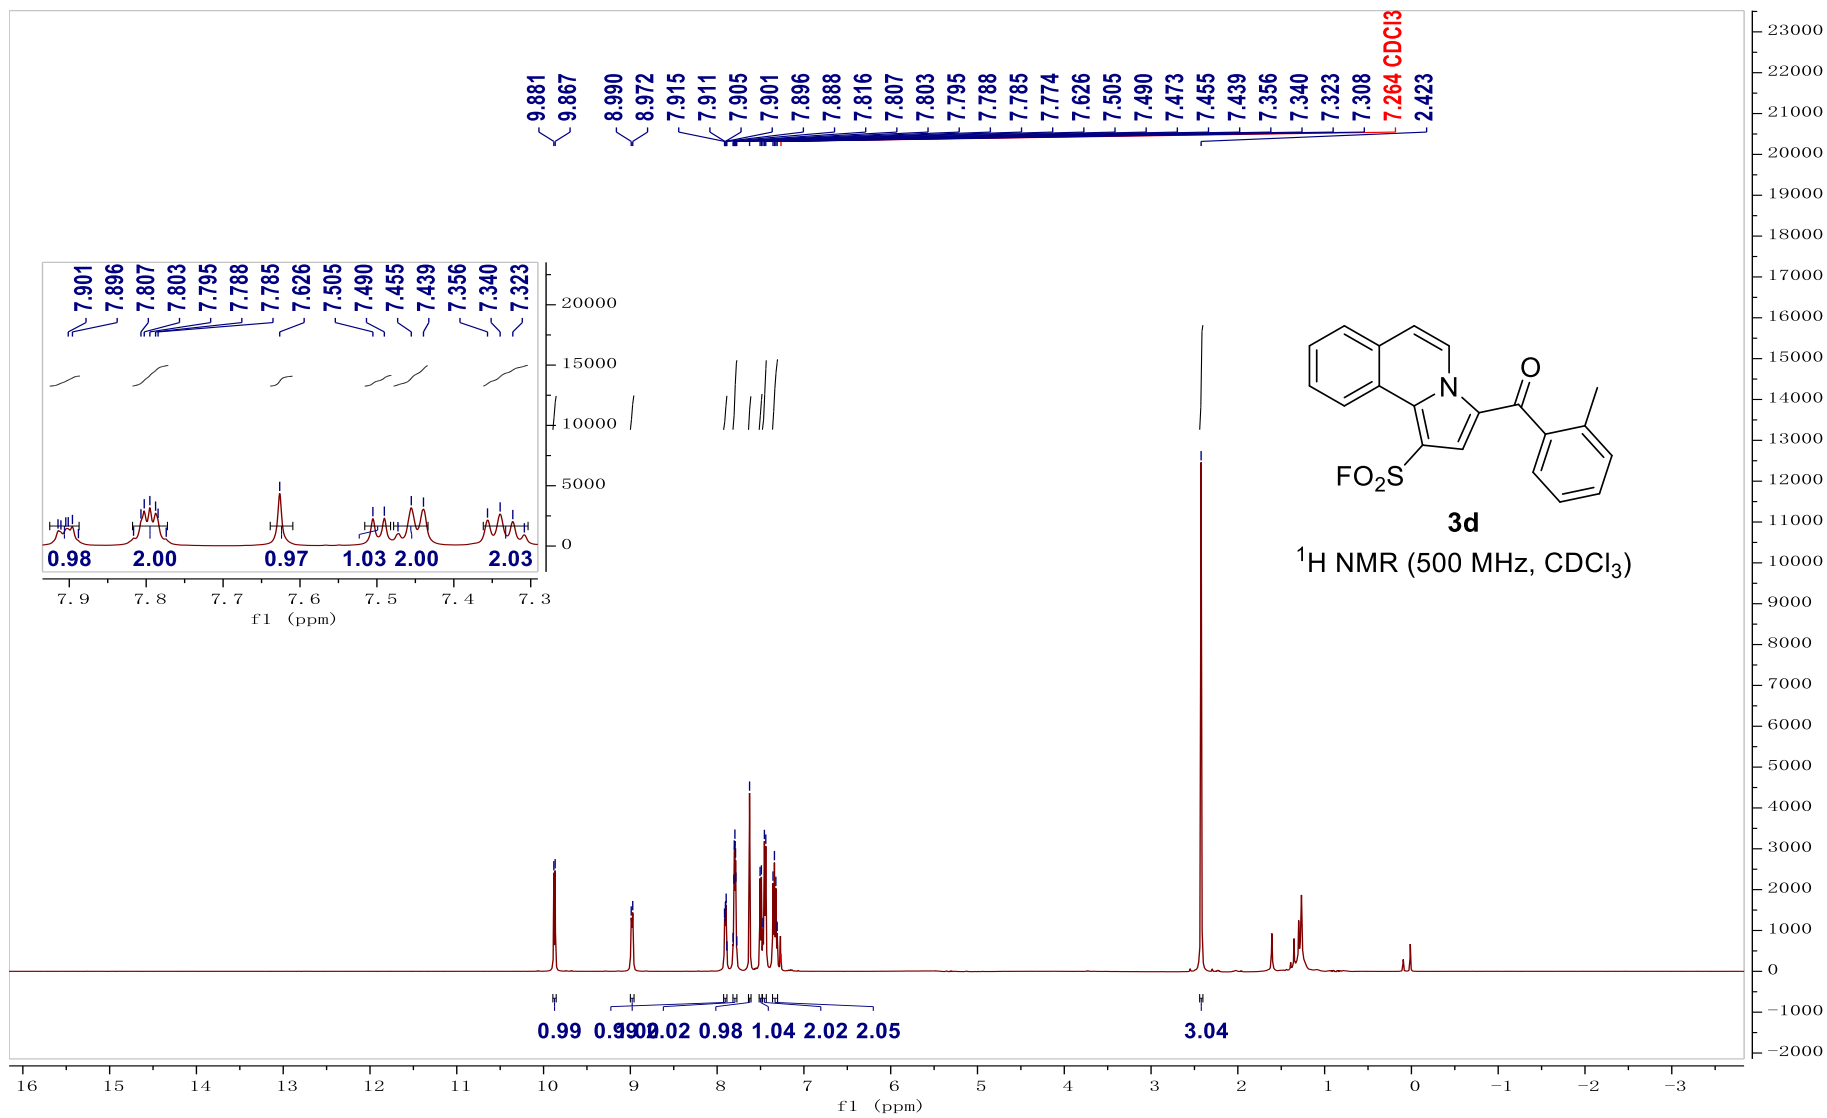

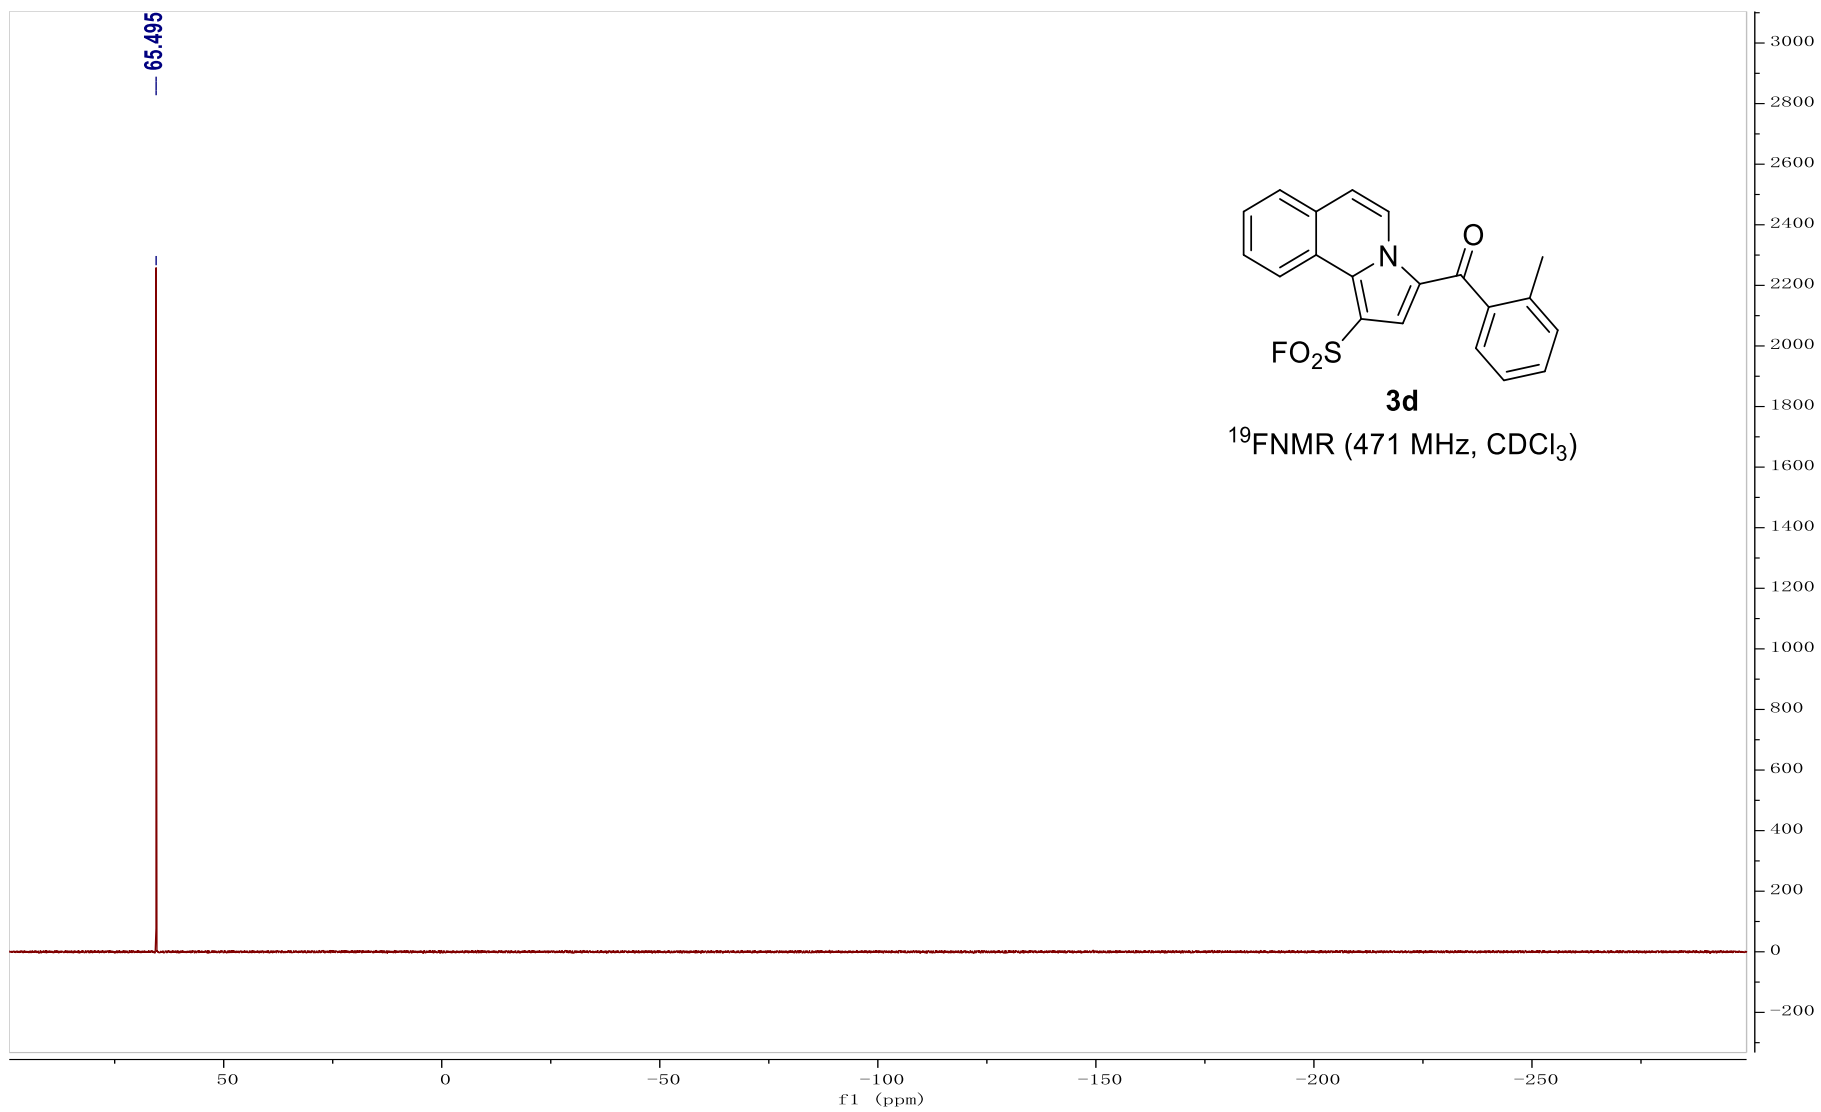

S88

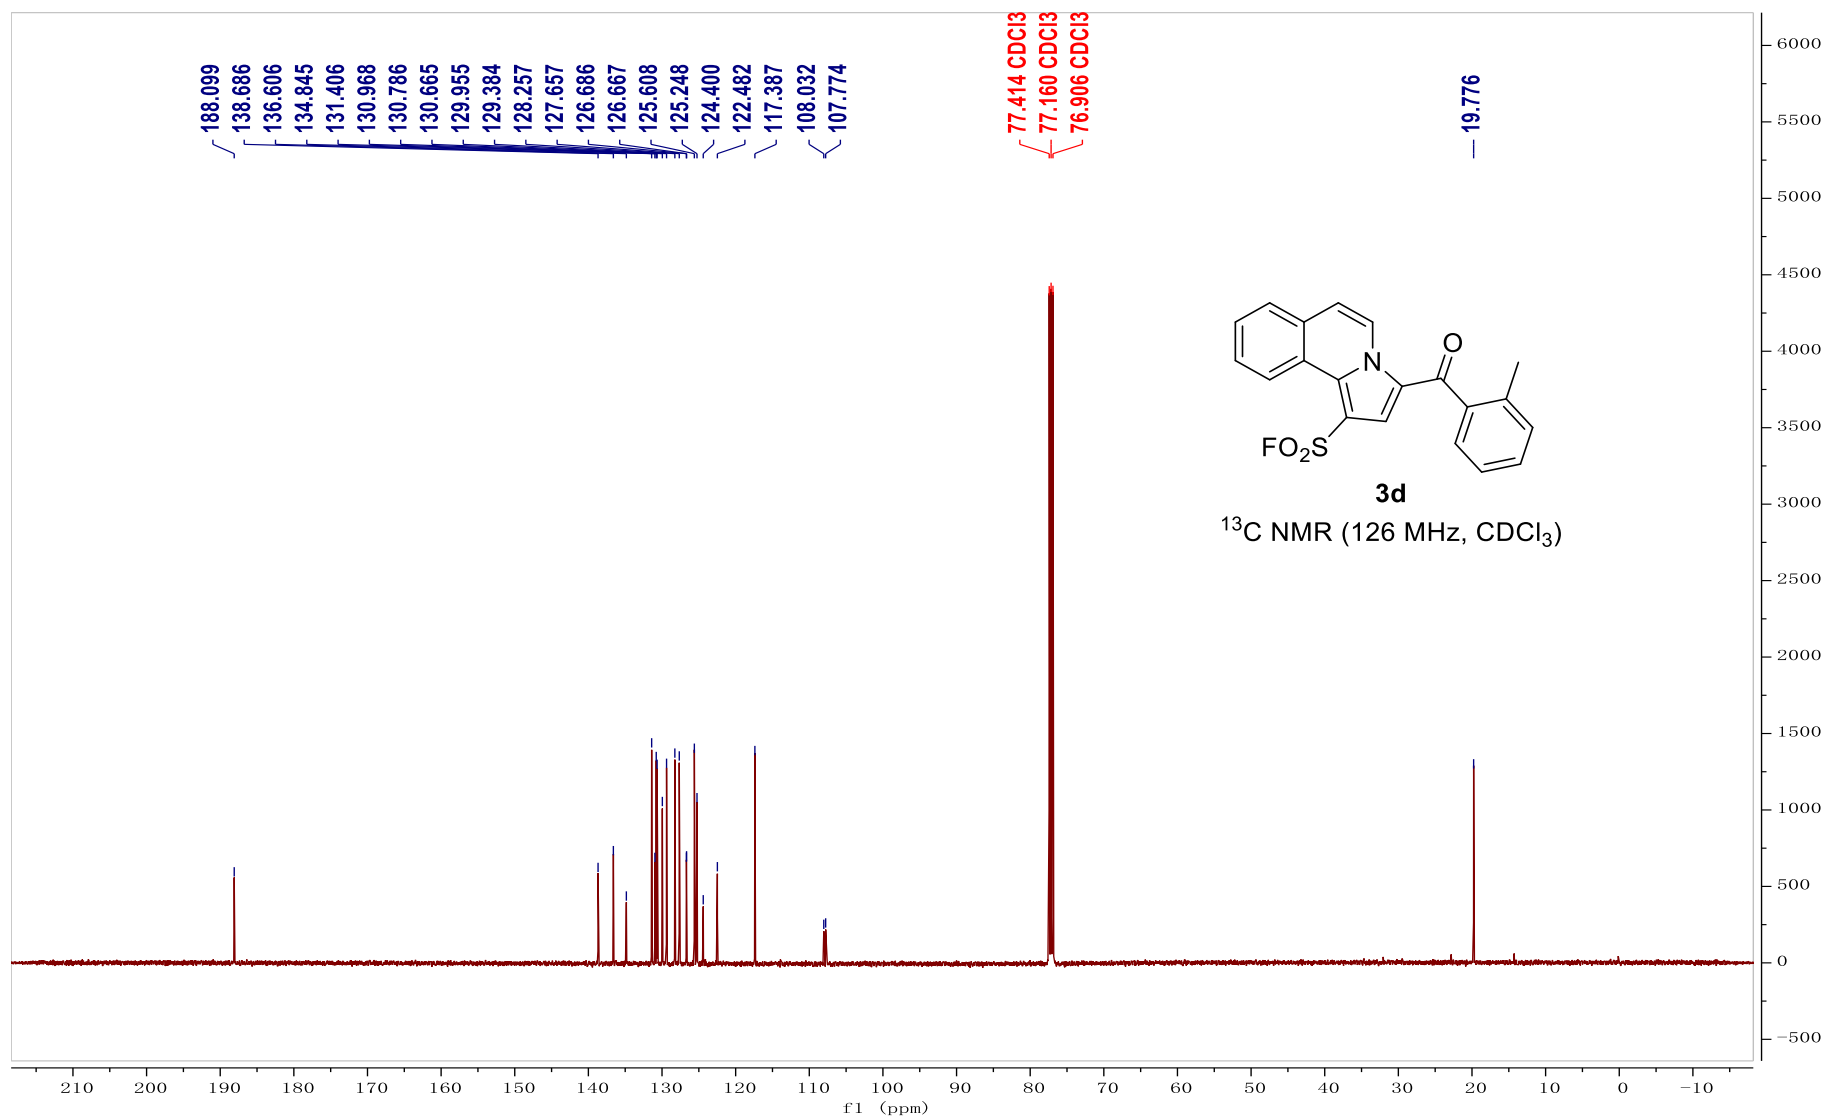

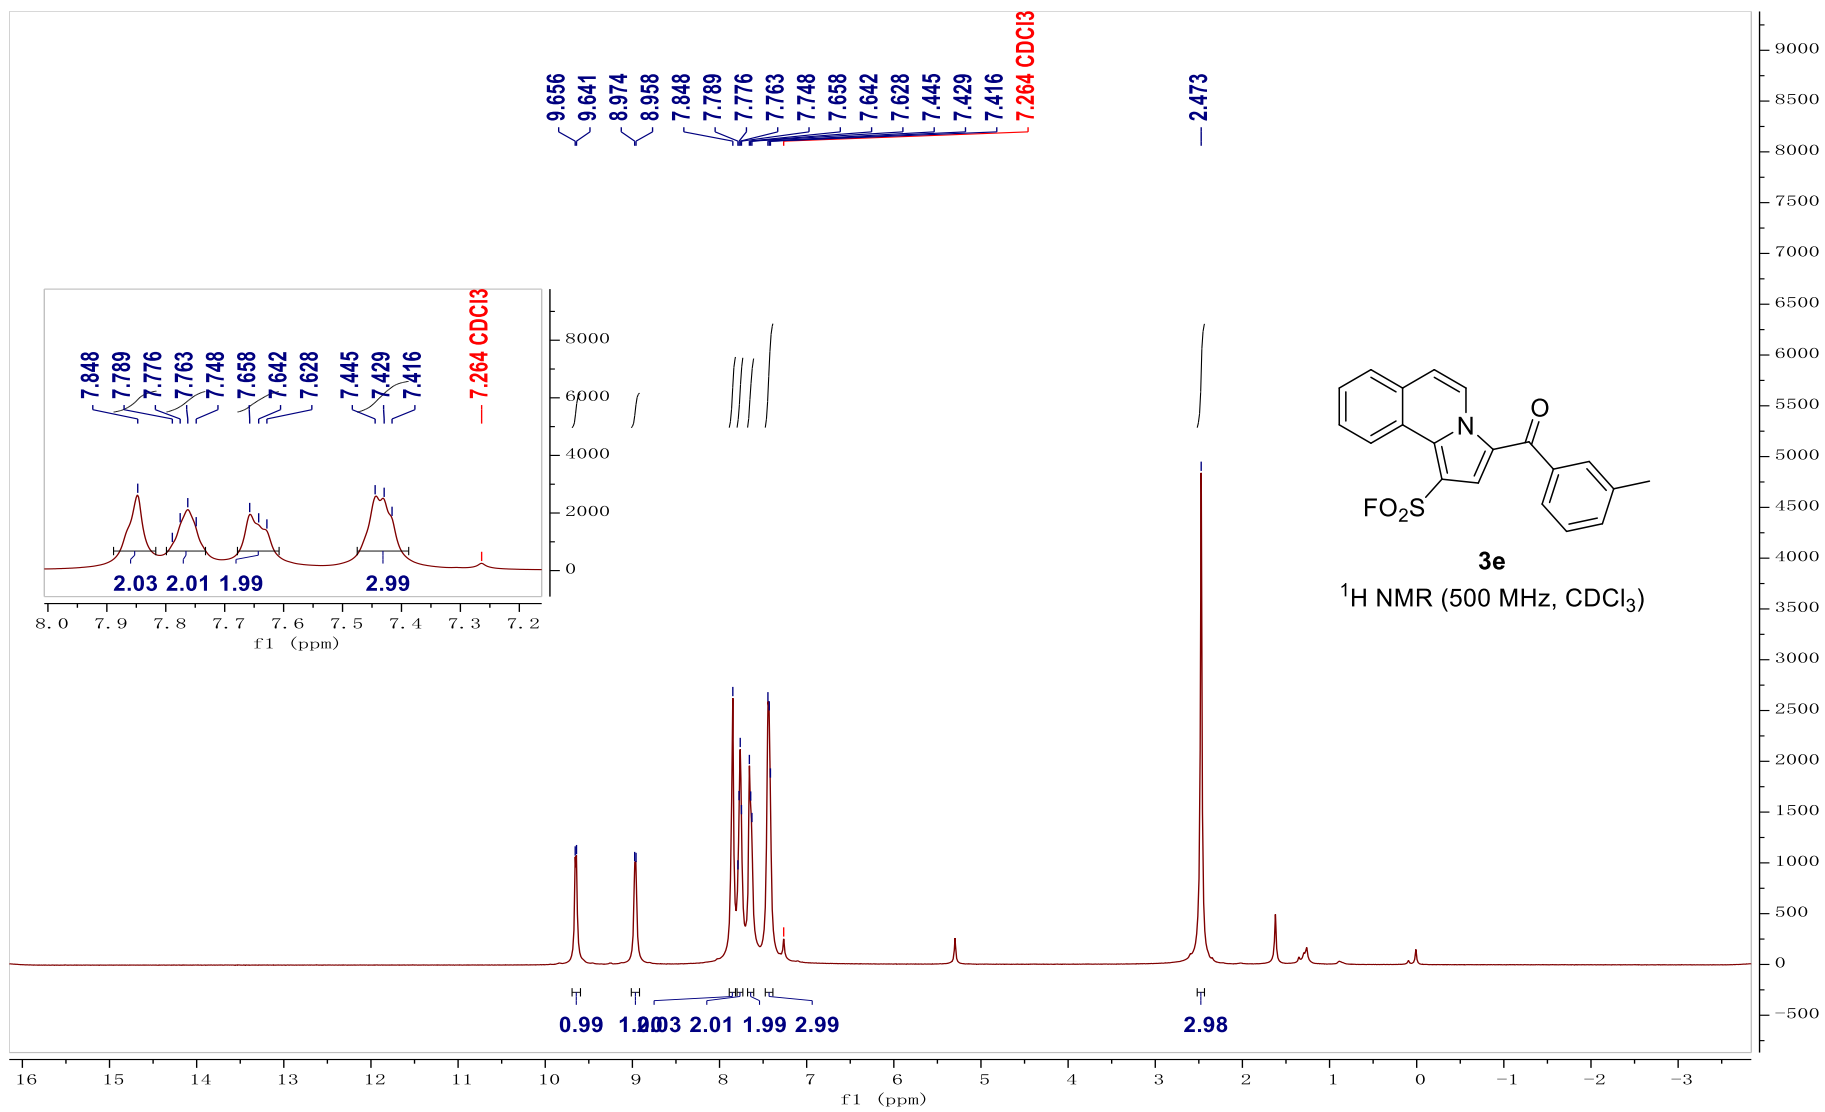

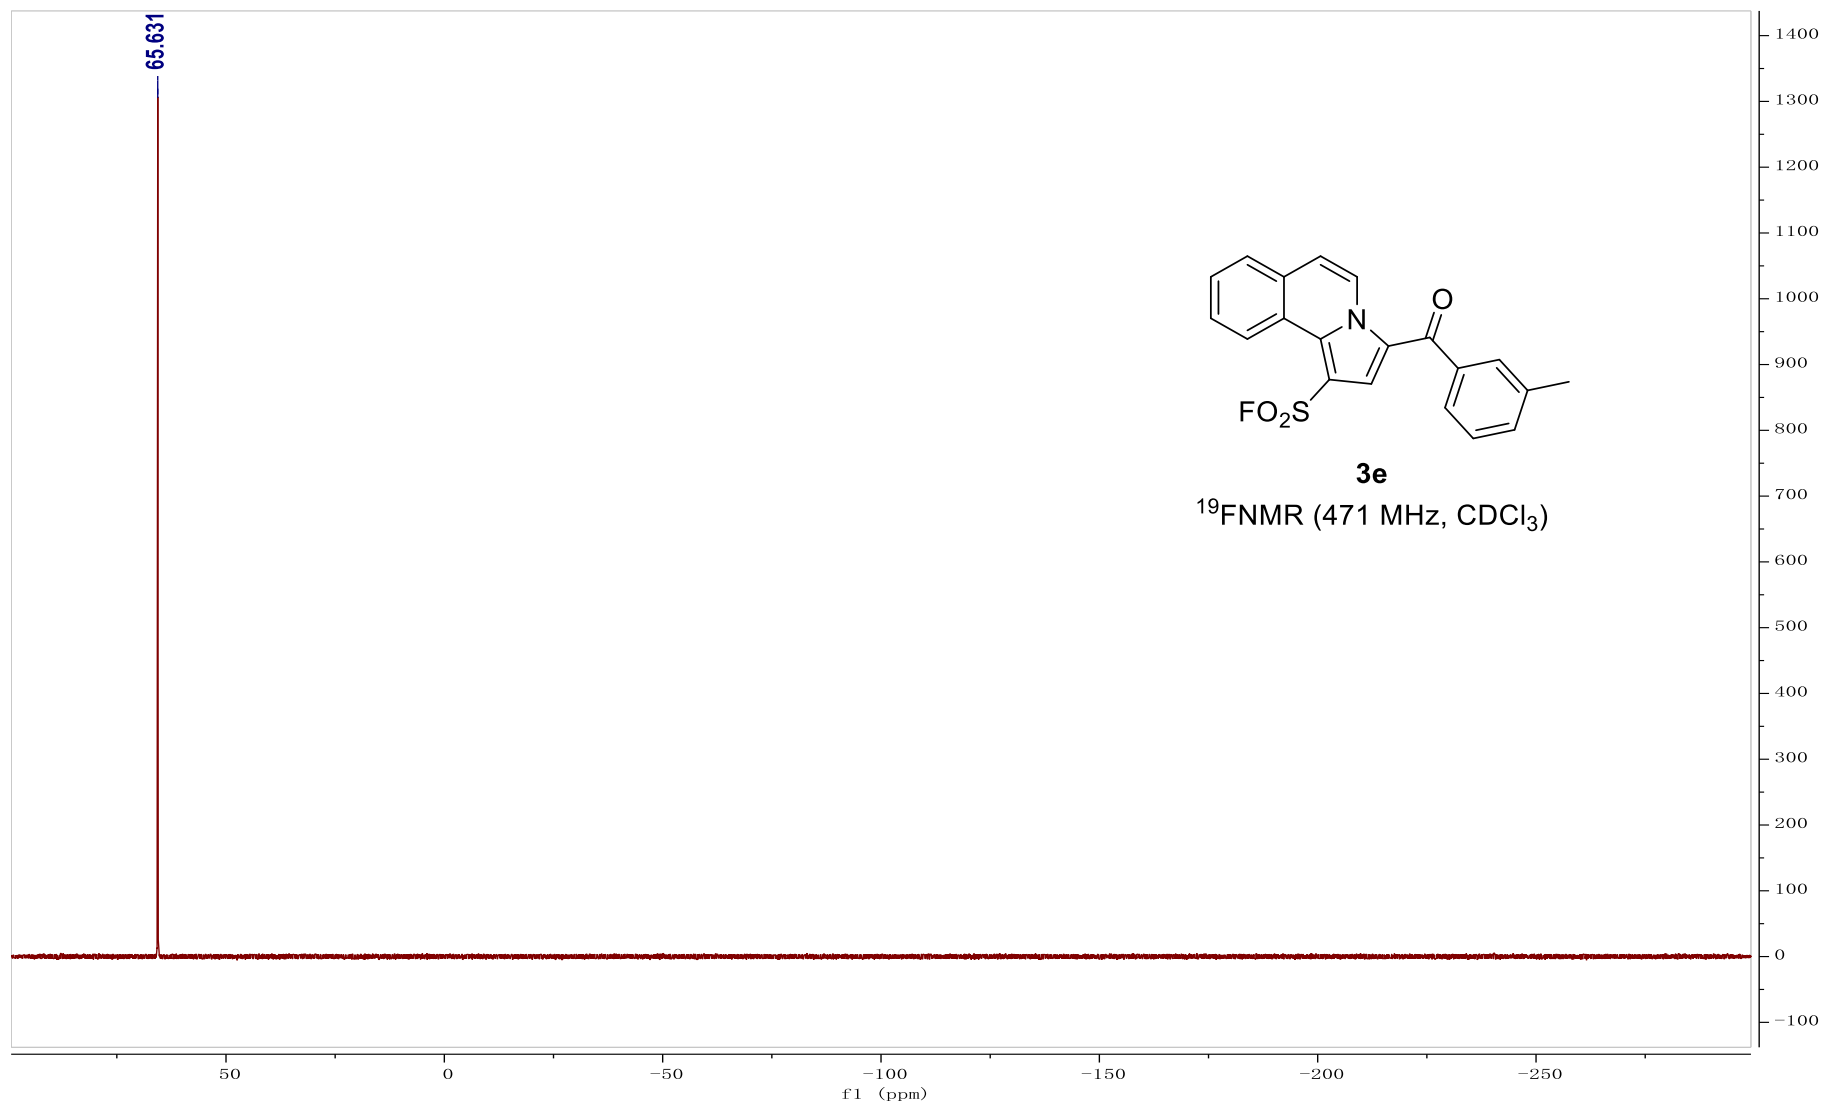

S91

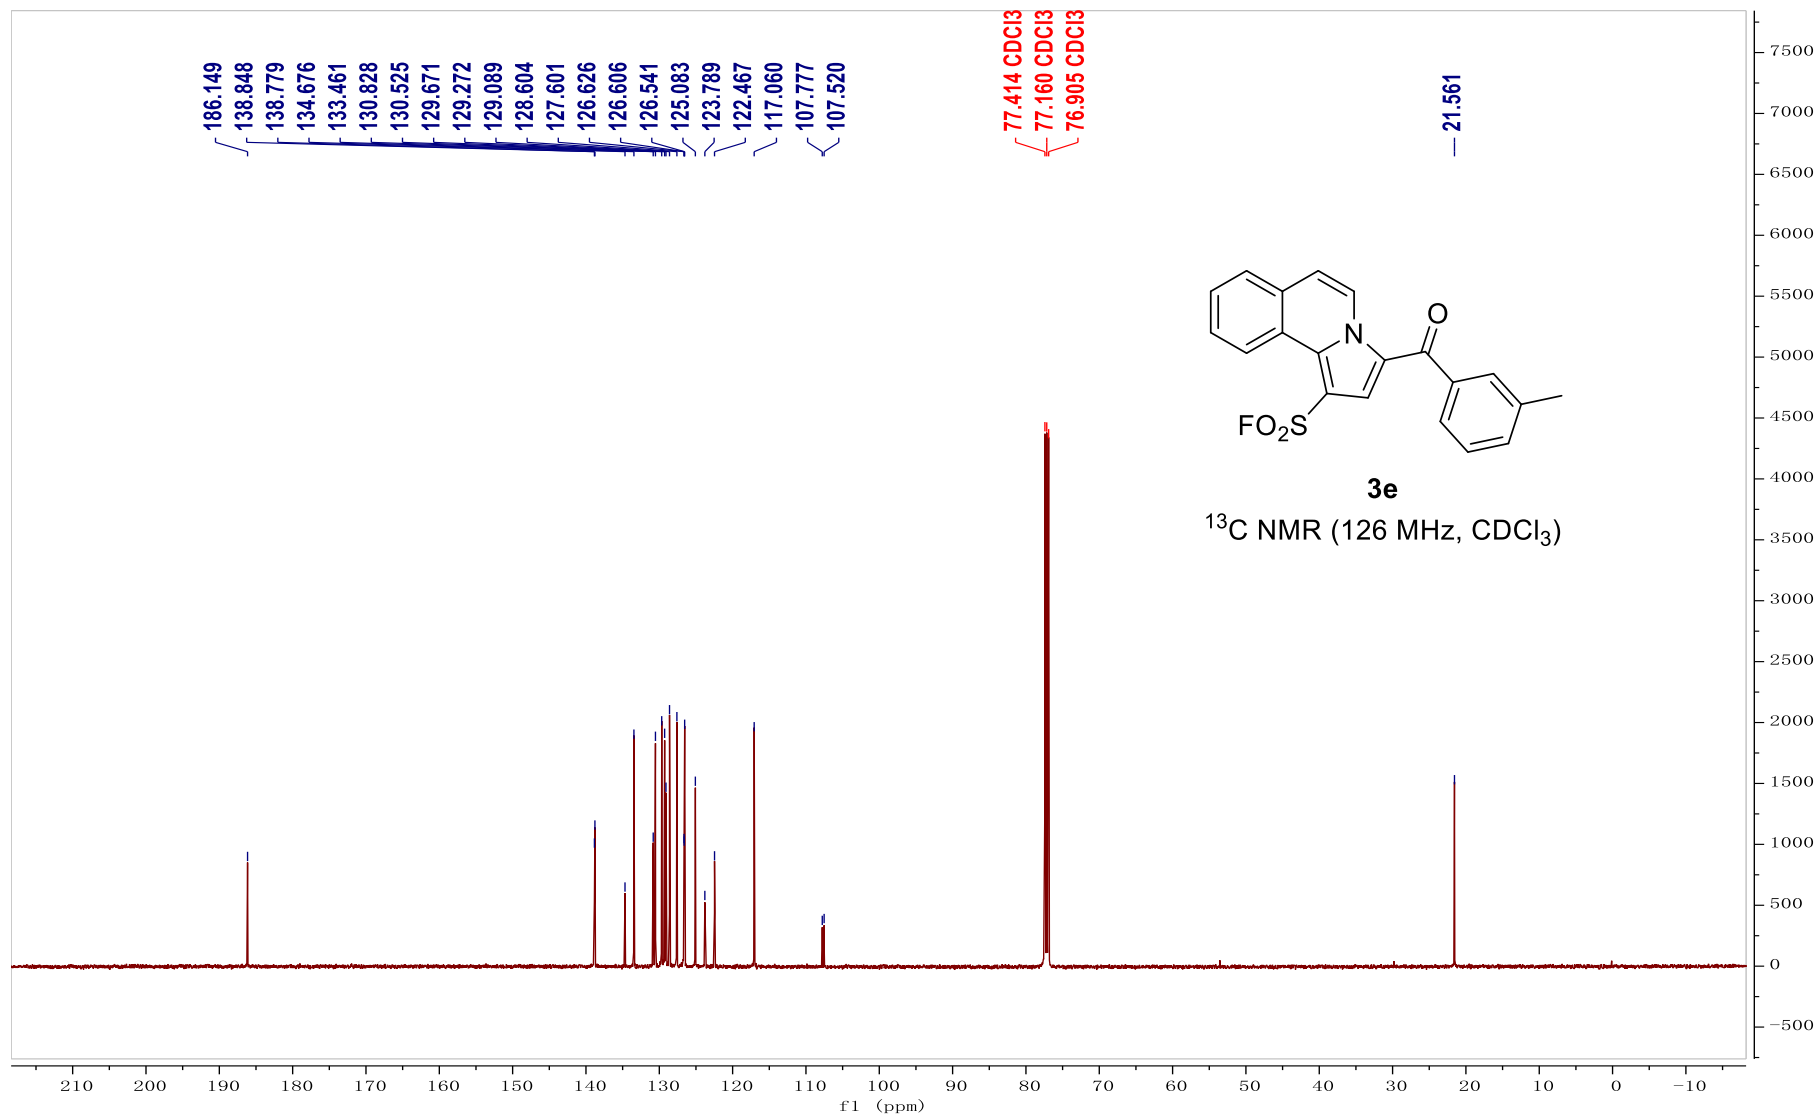

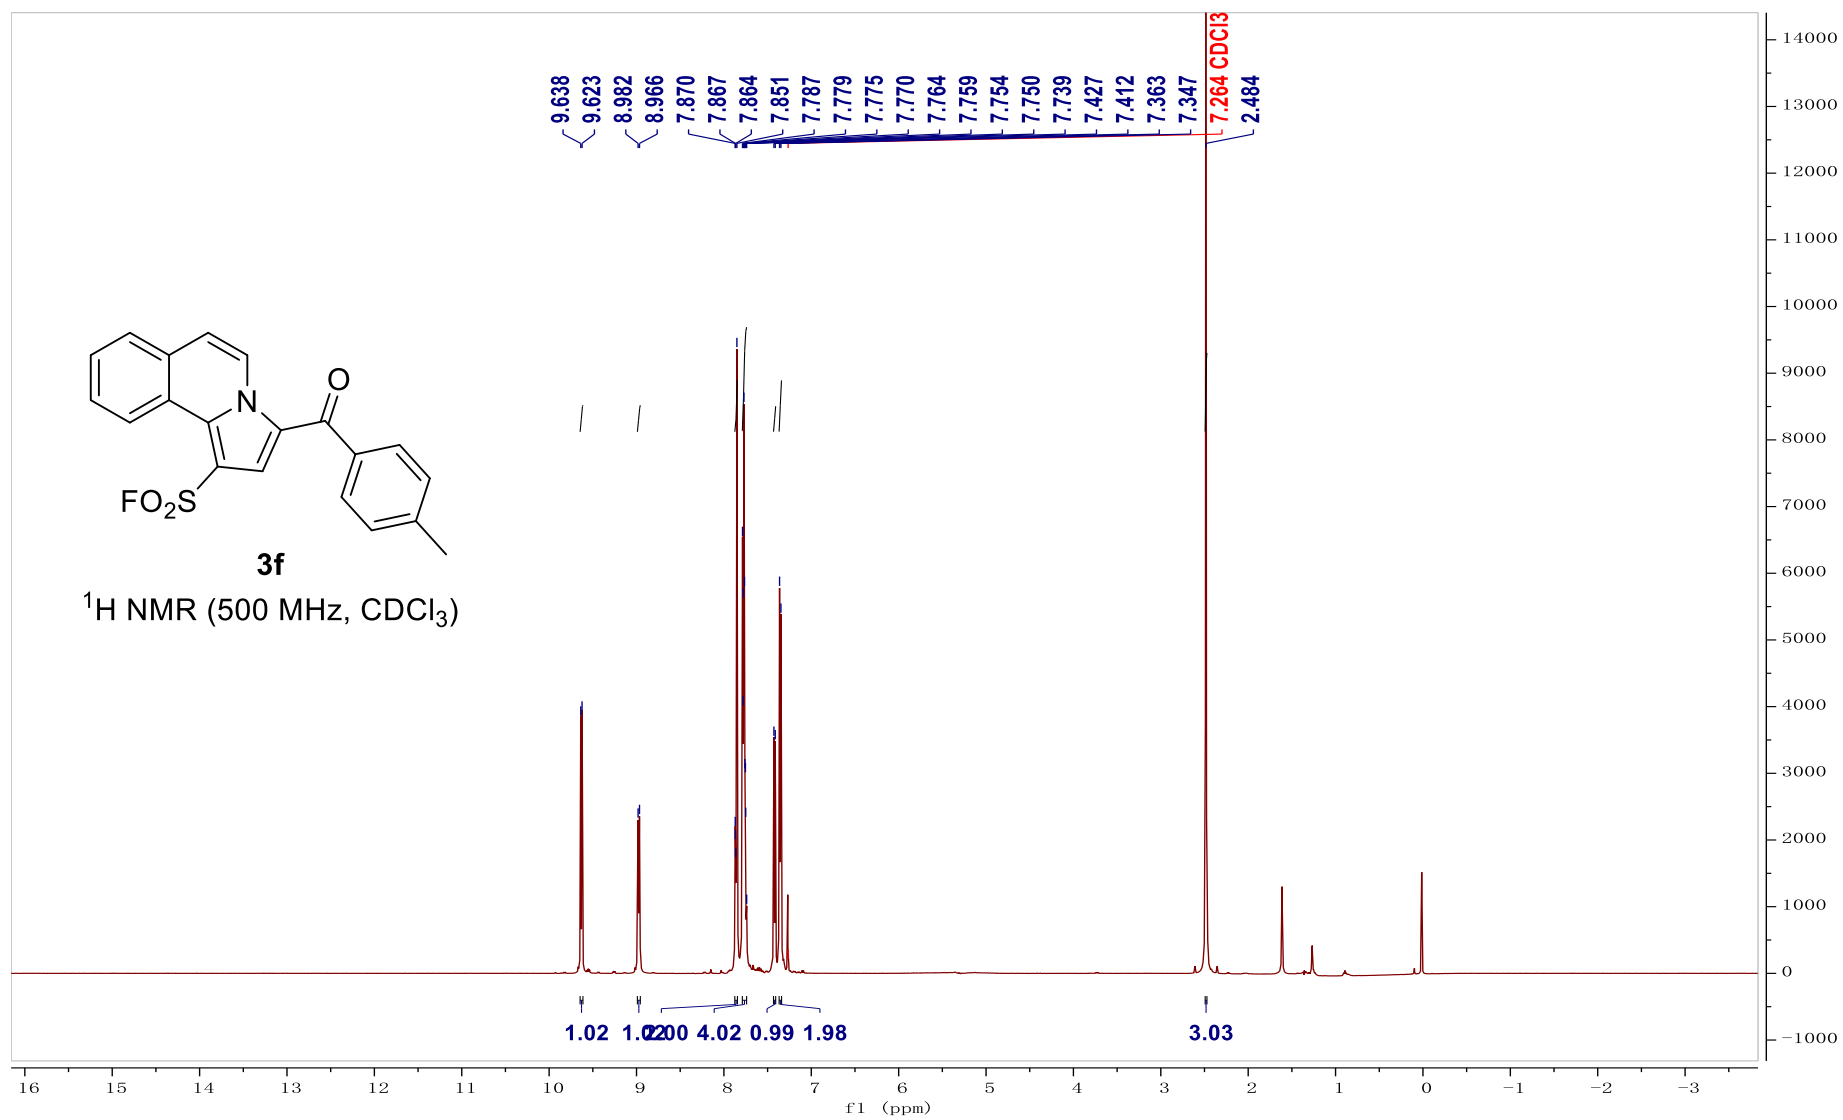

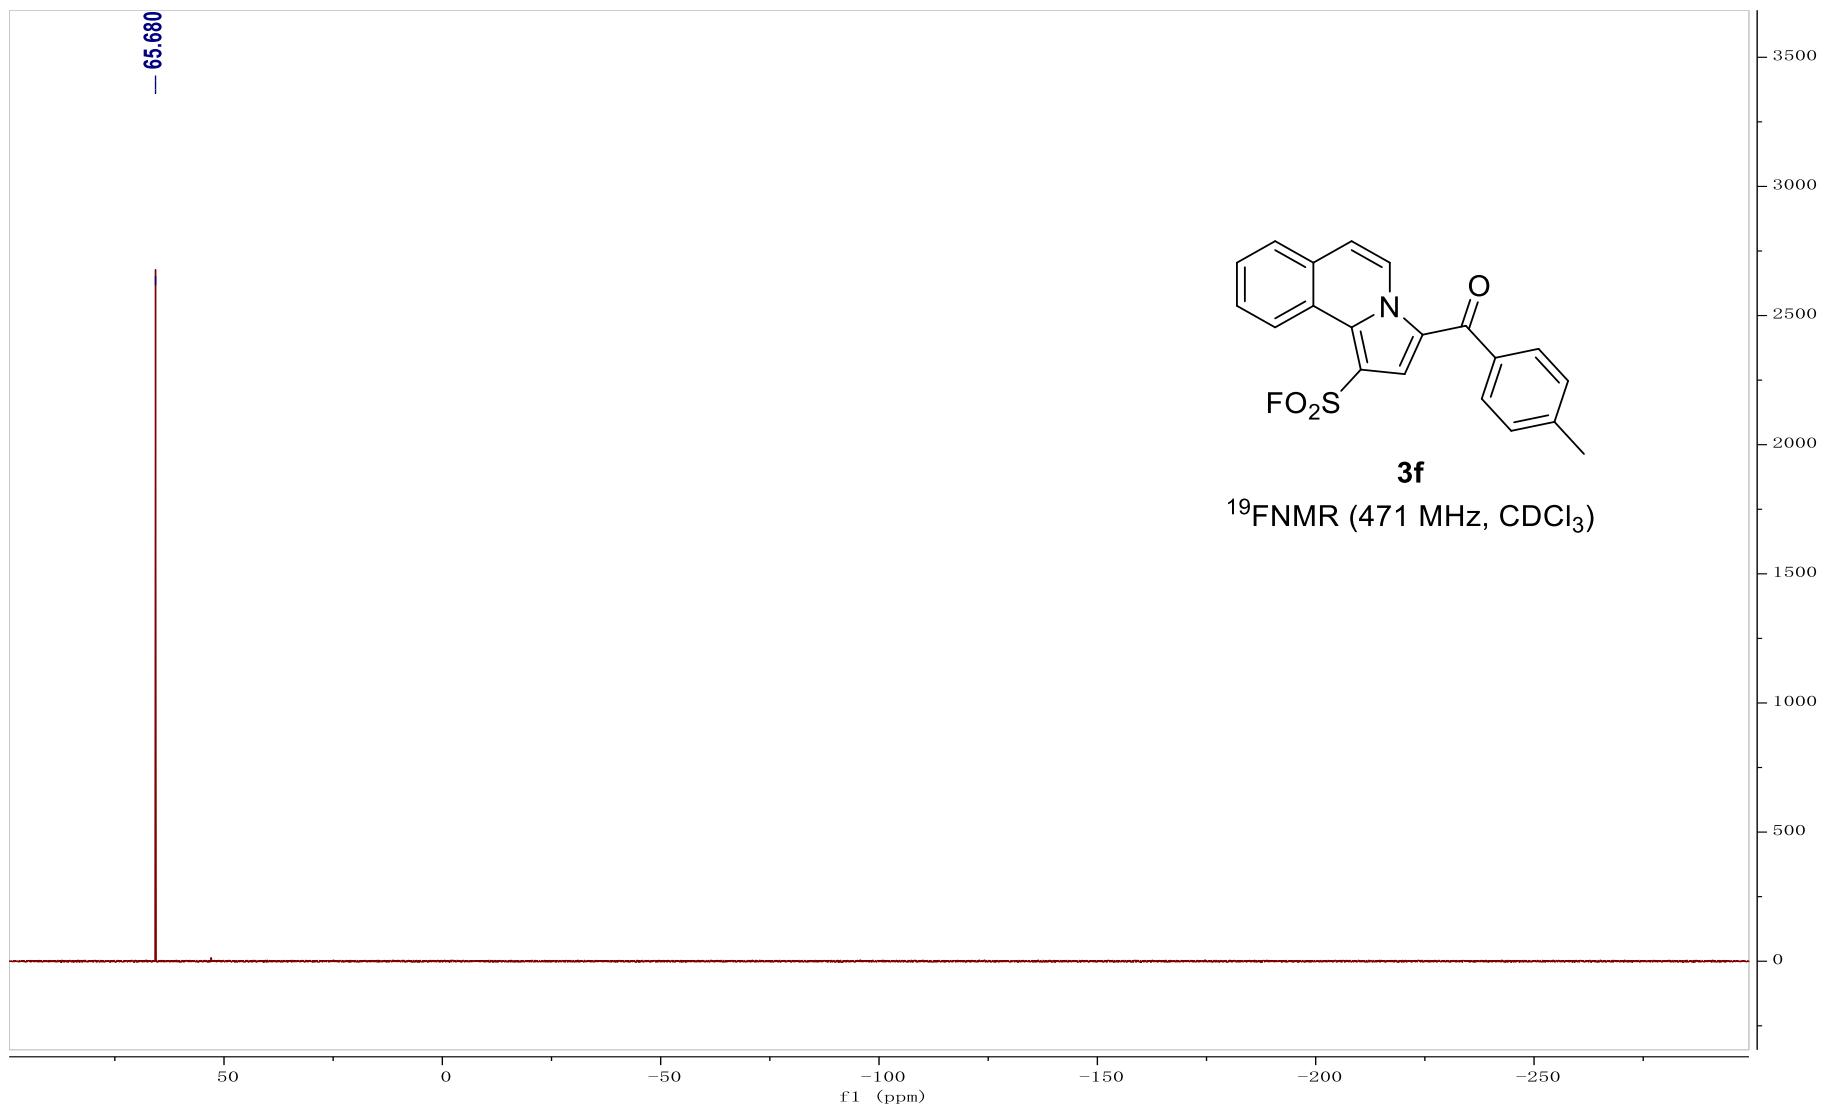

S94



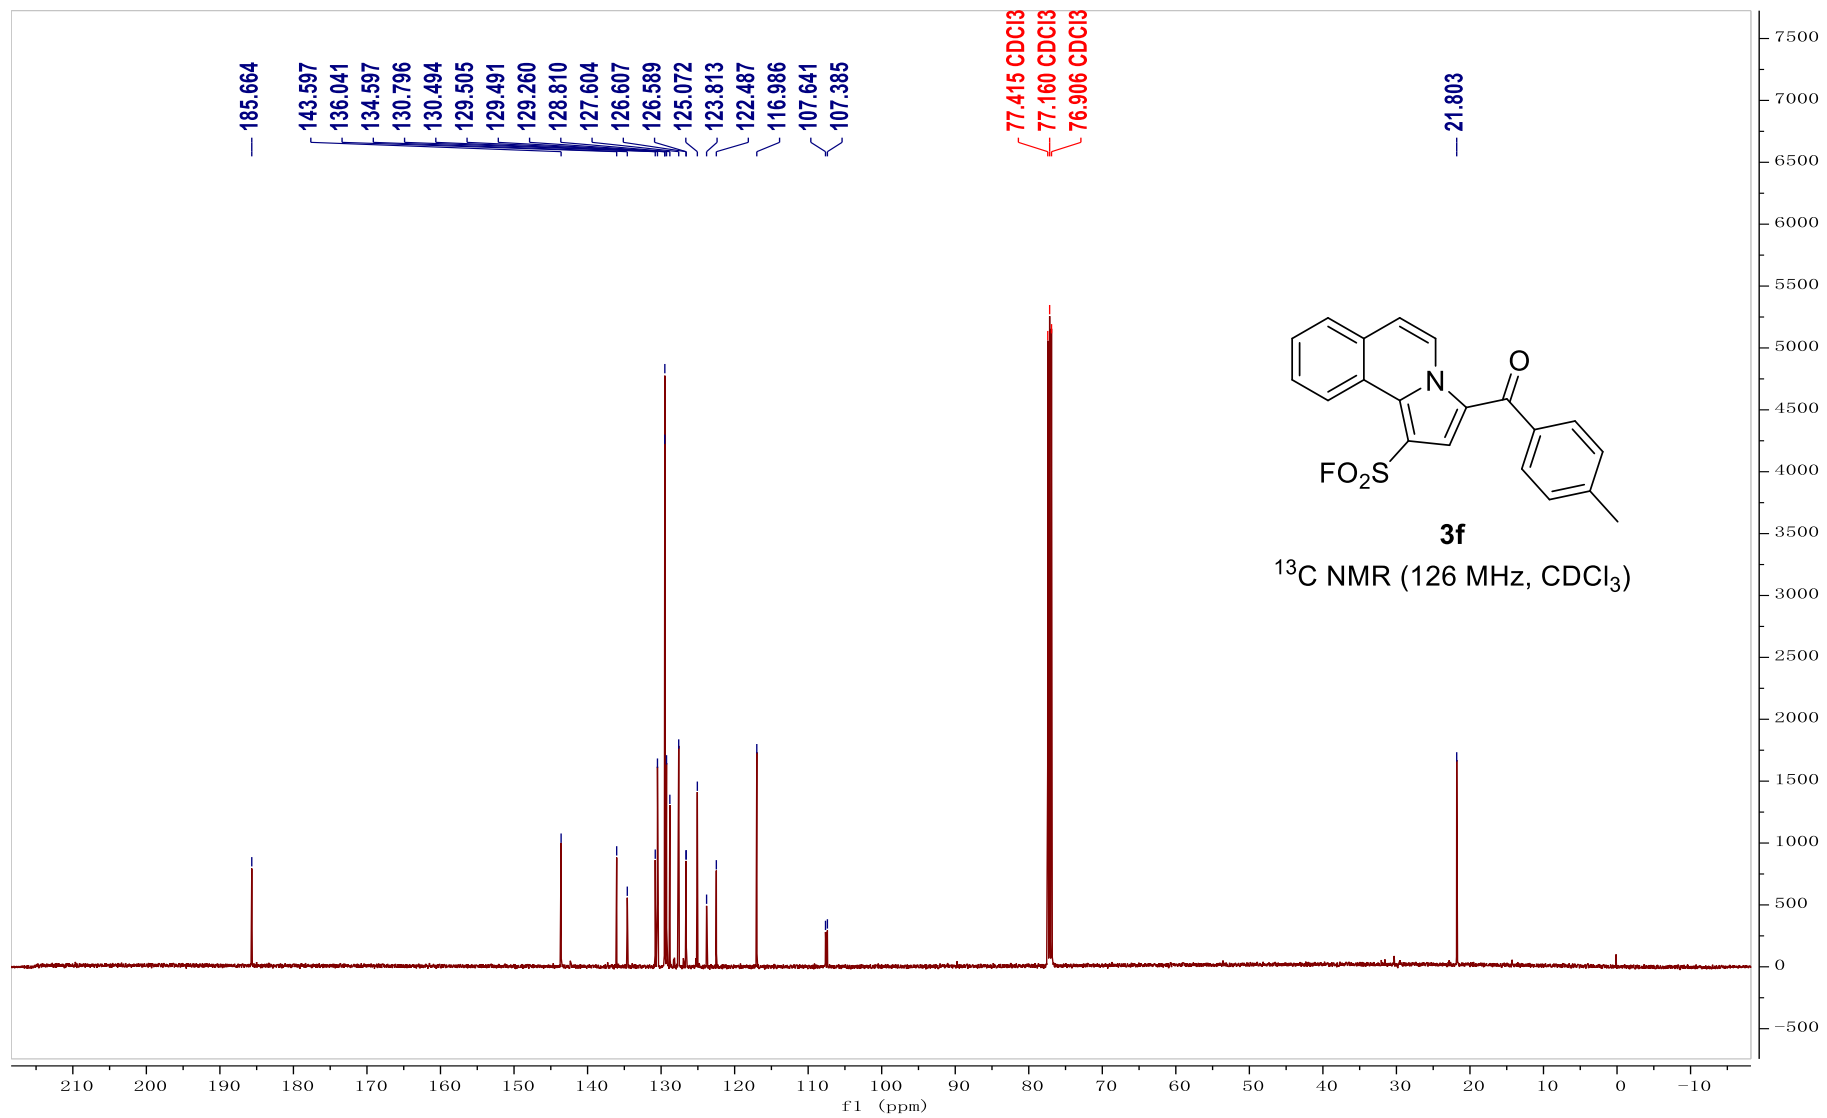

S95

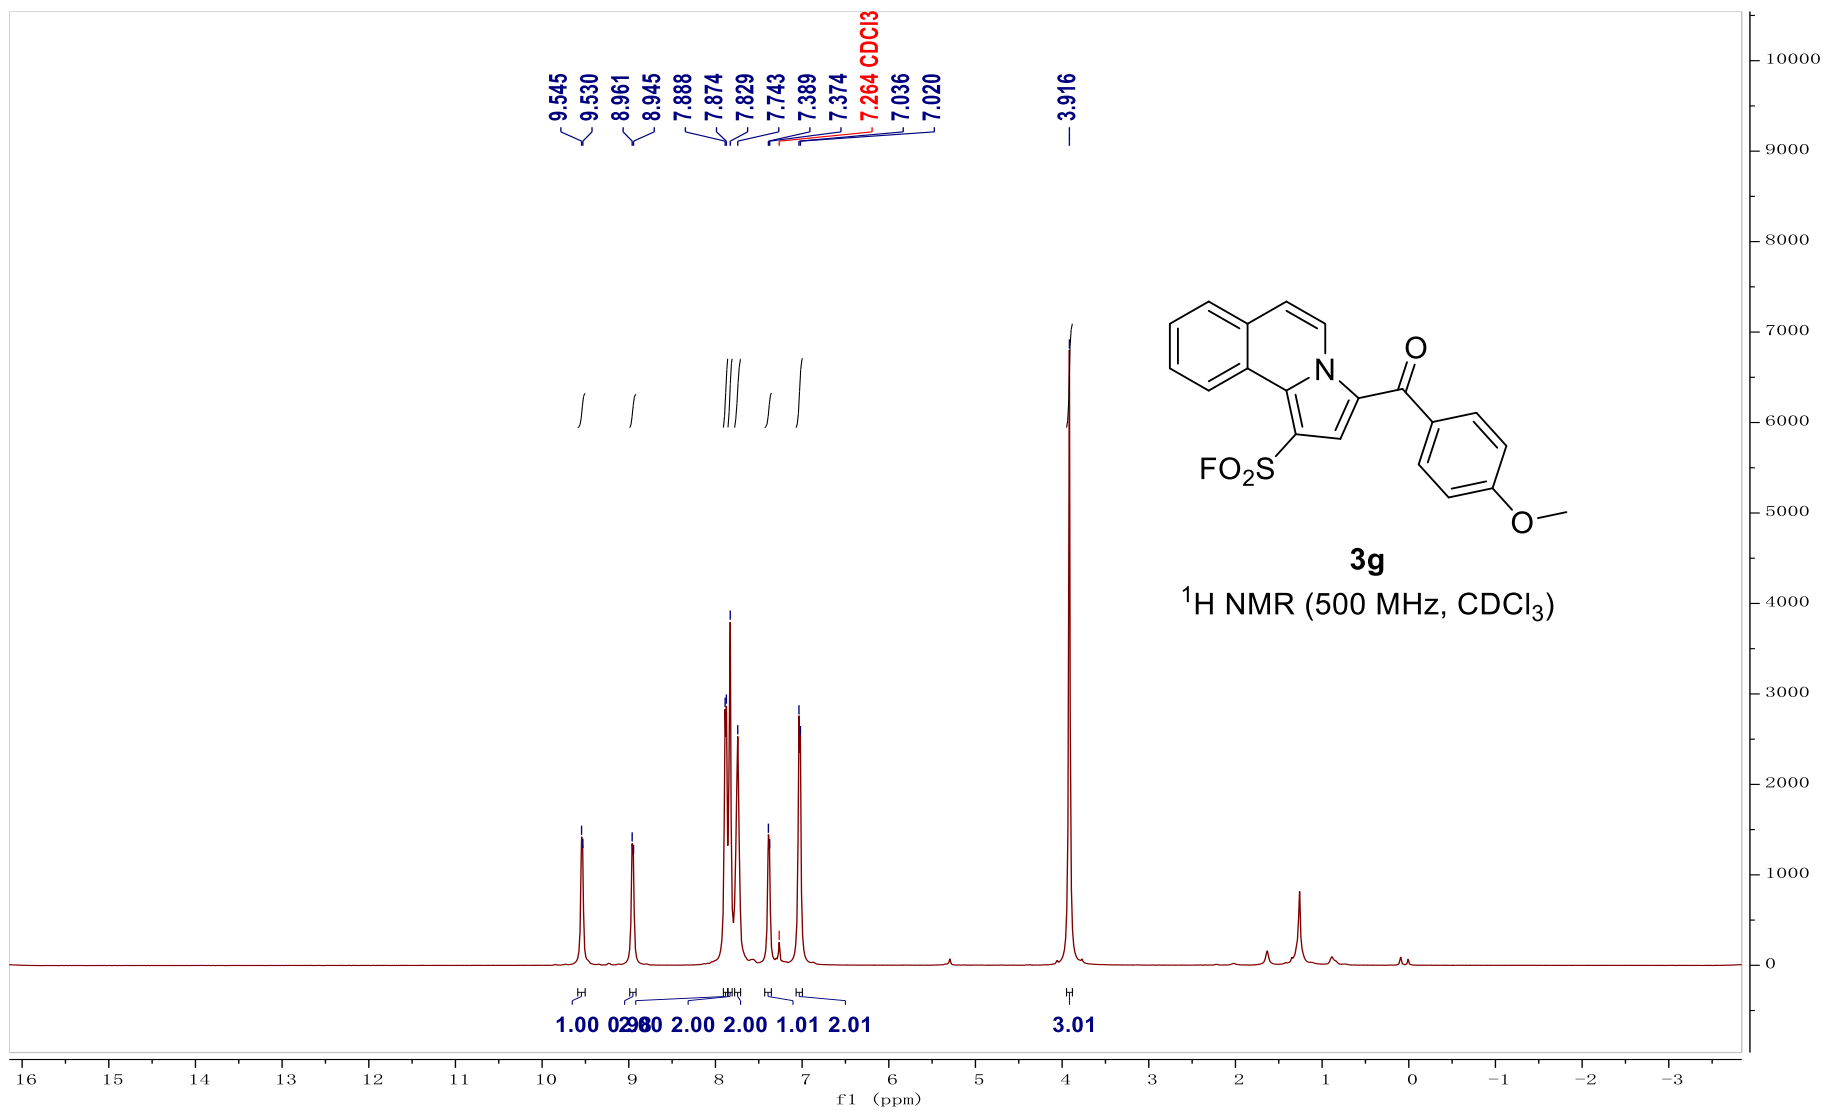

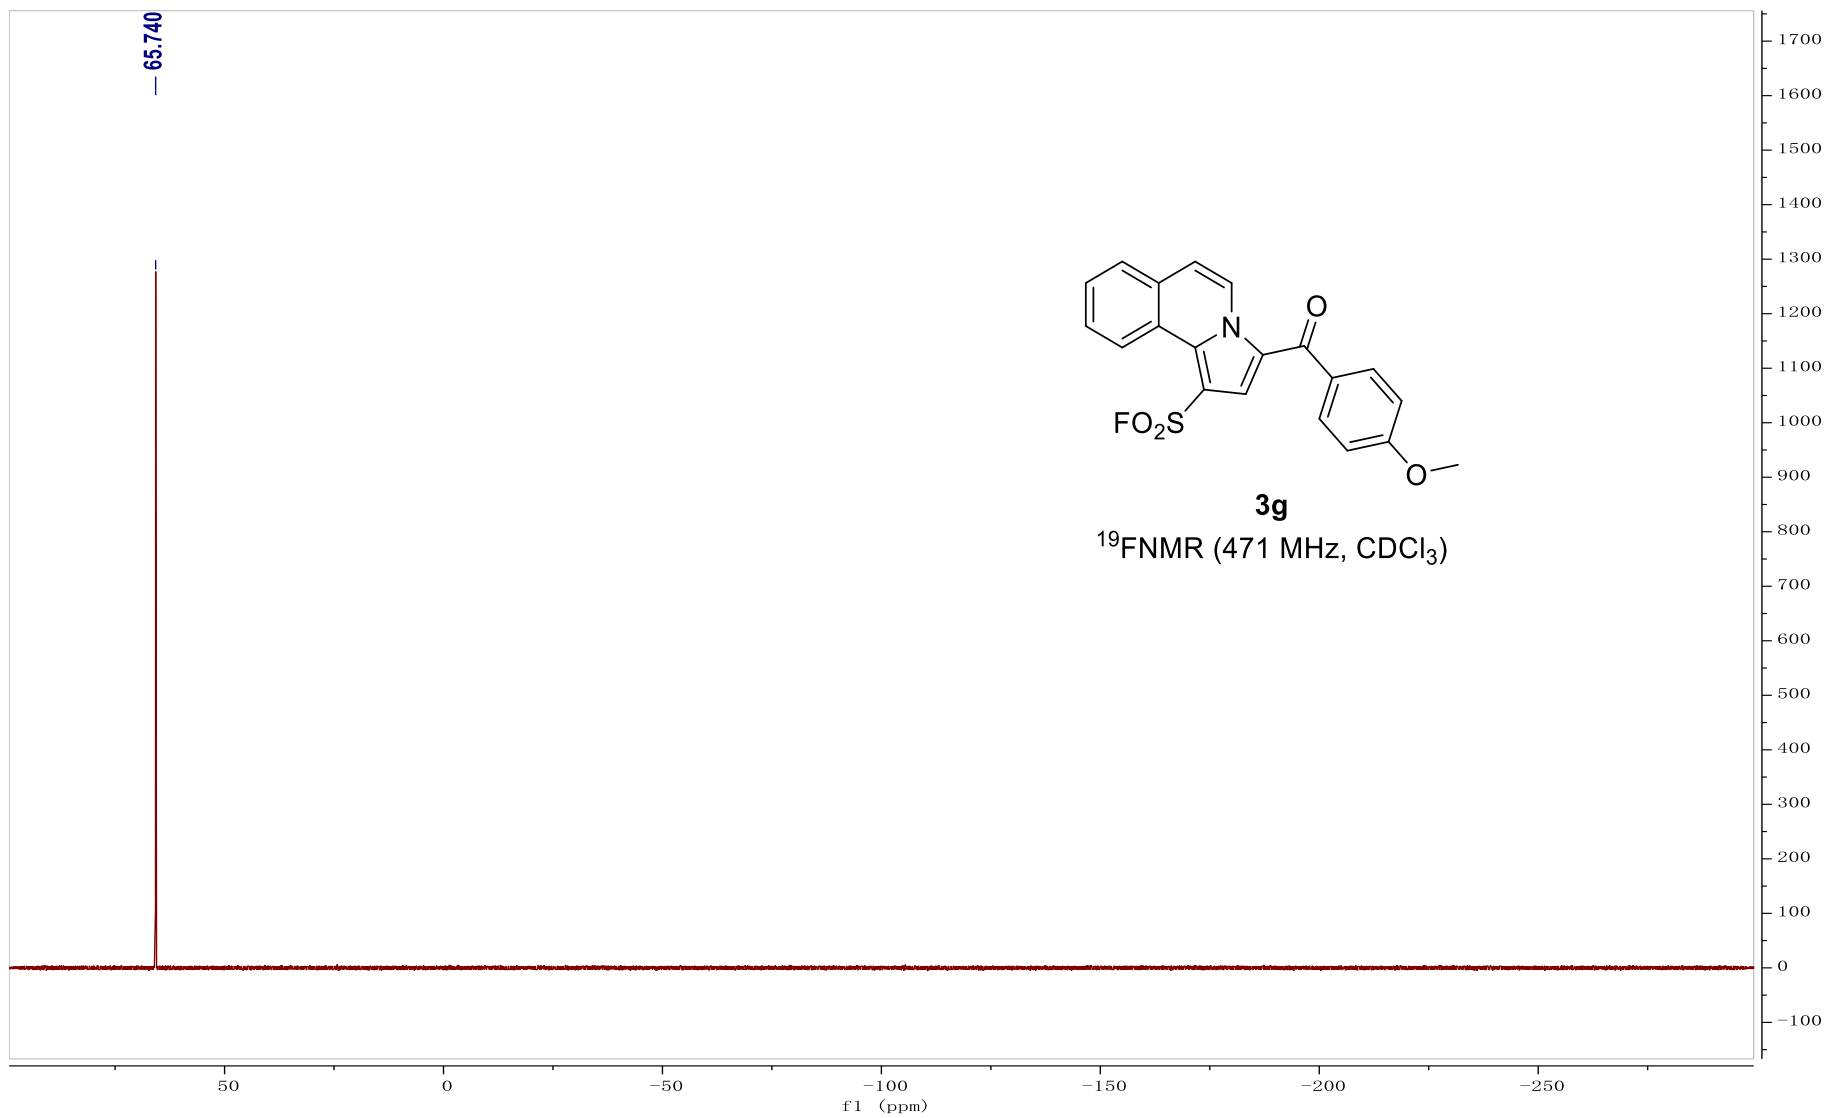

S97

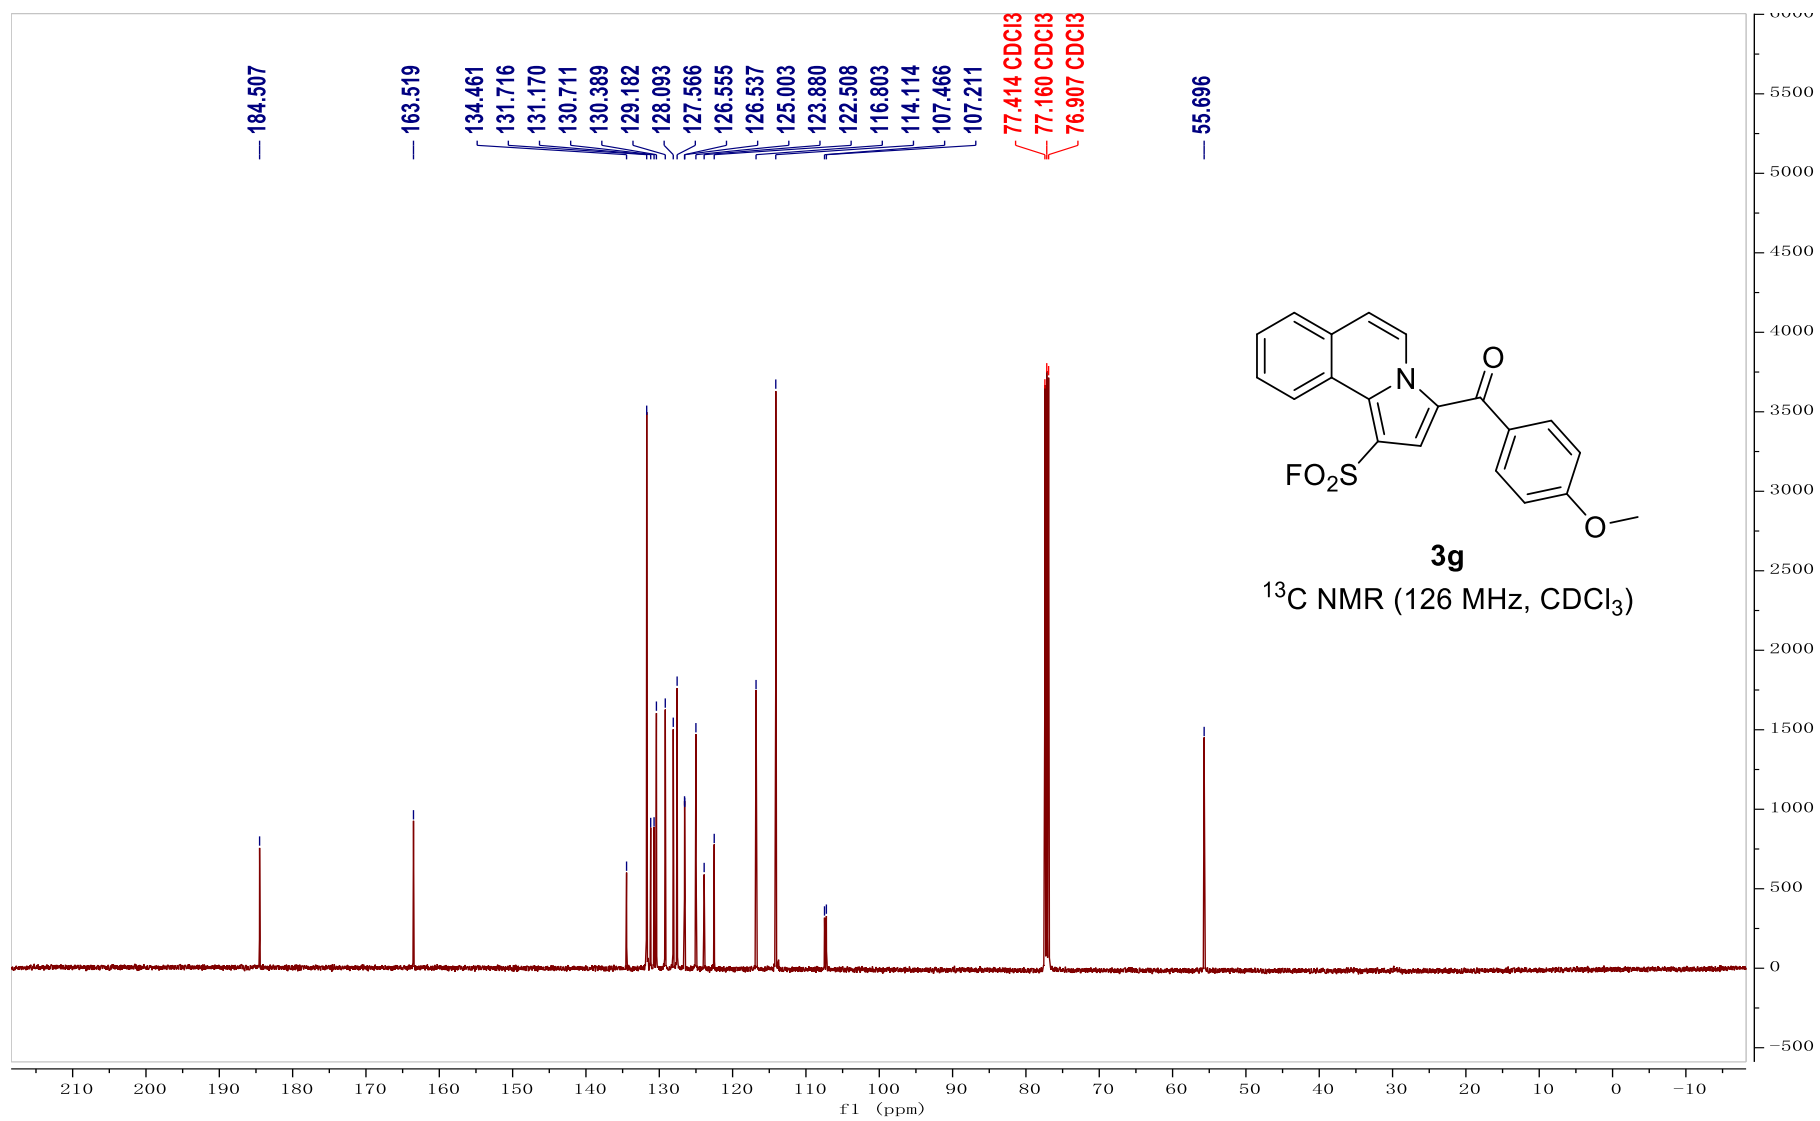

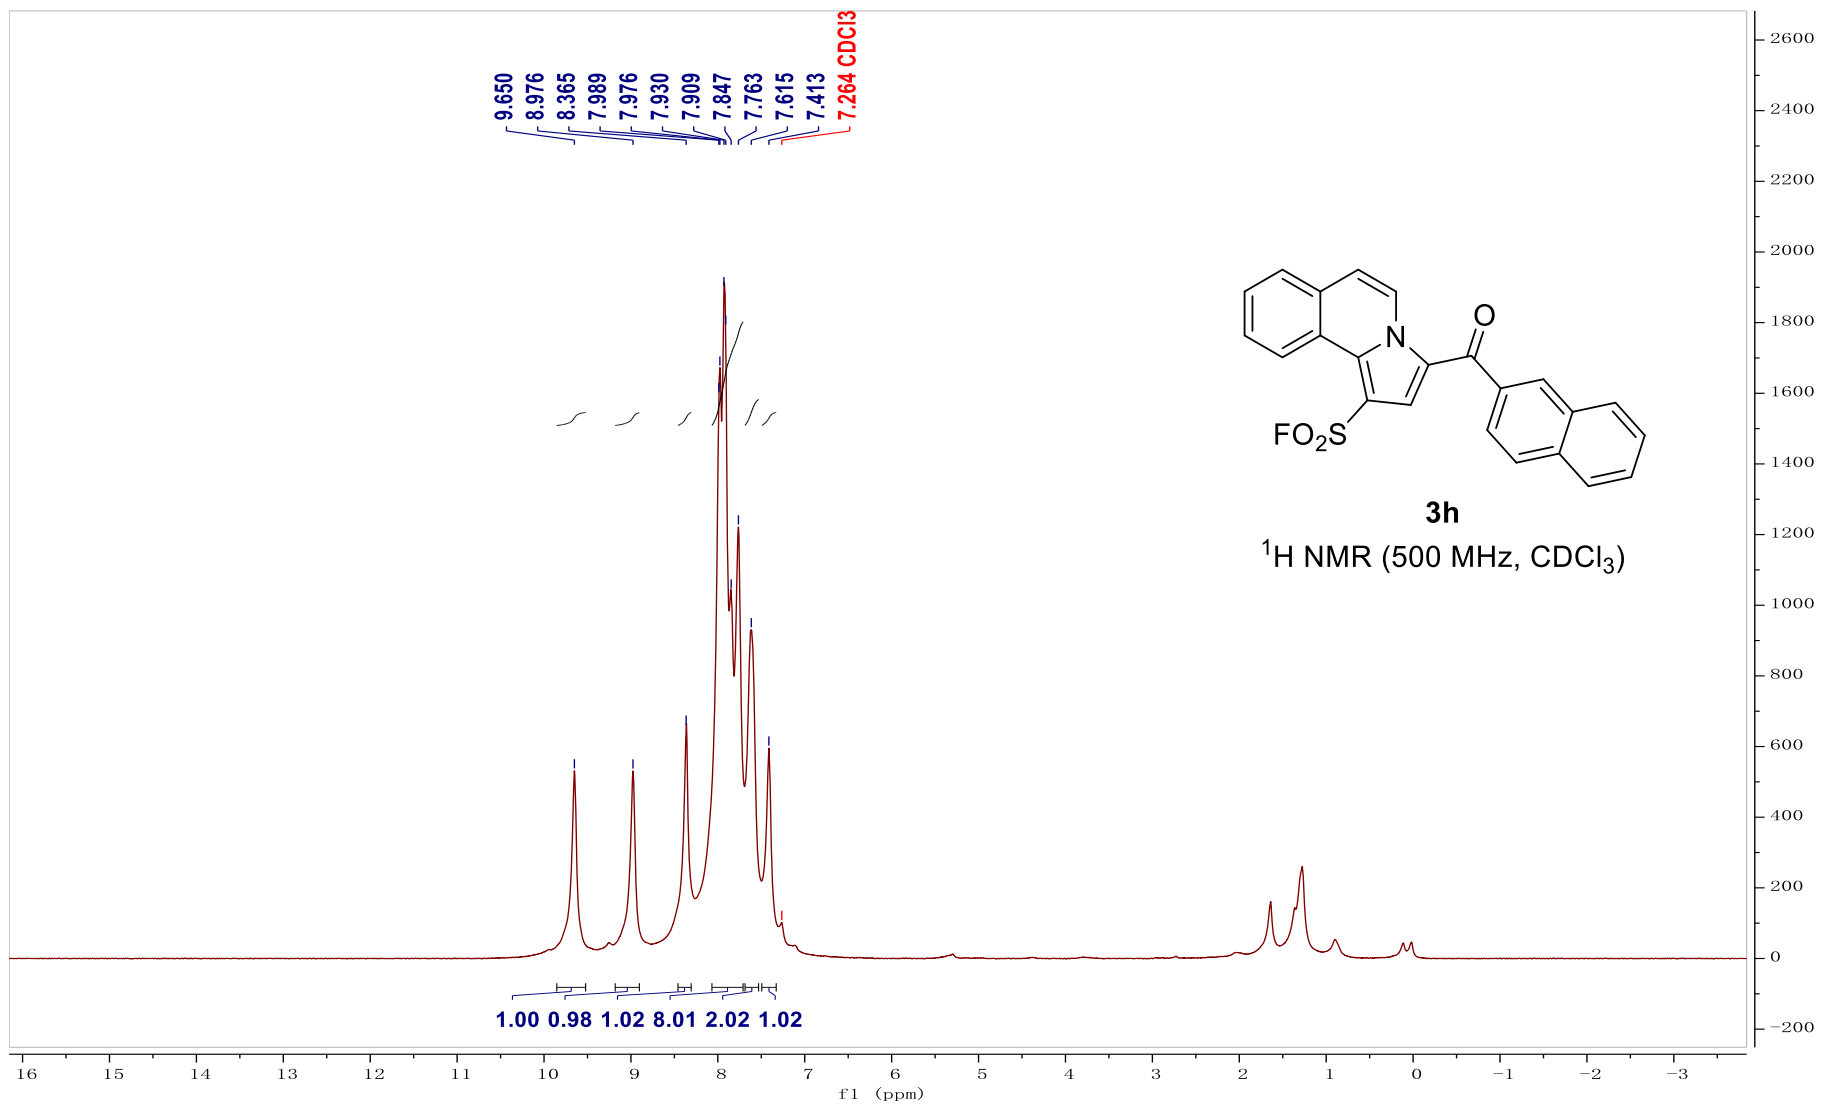

S99

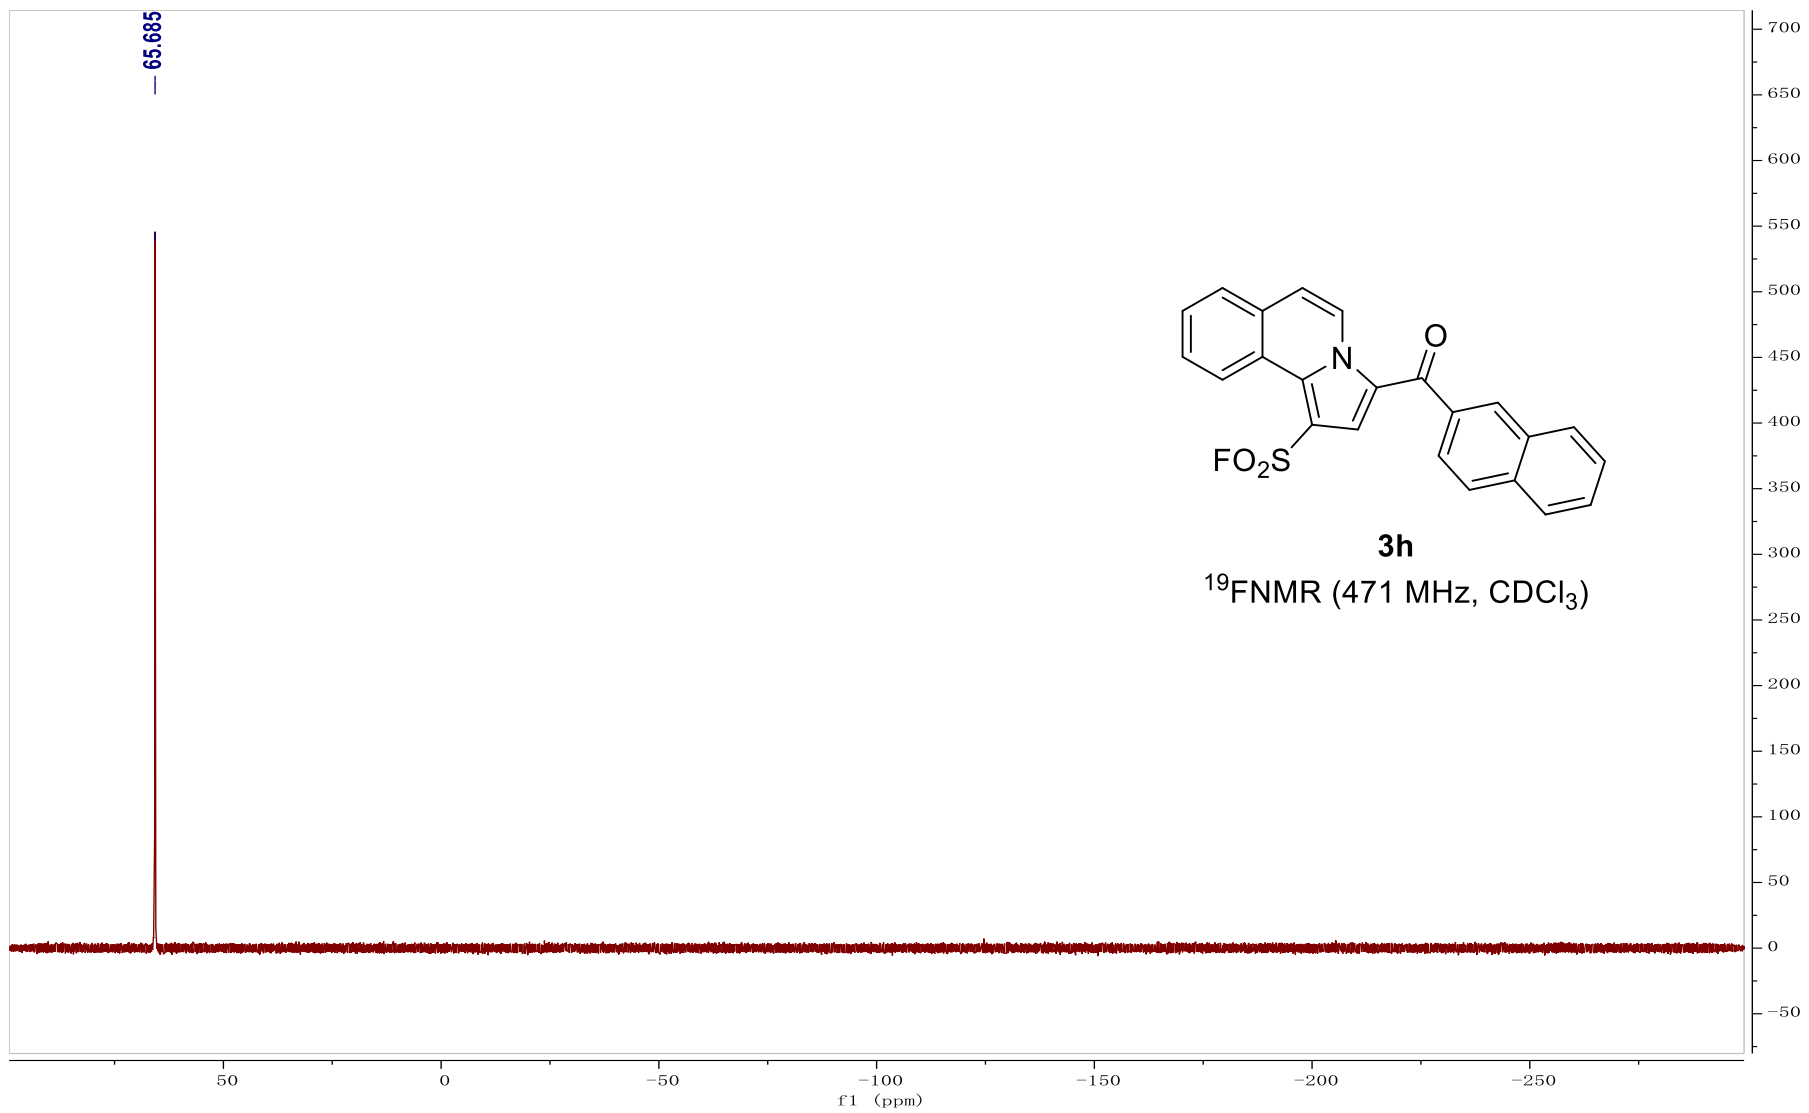

S100

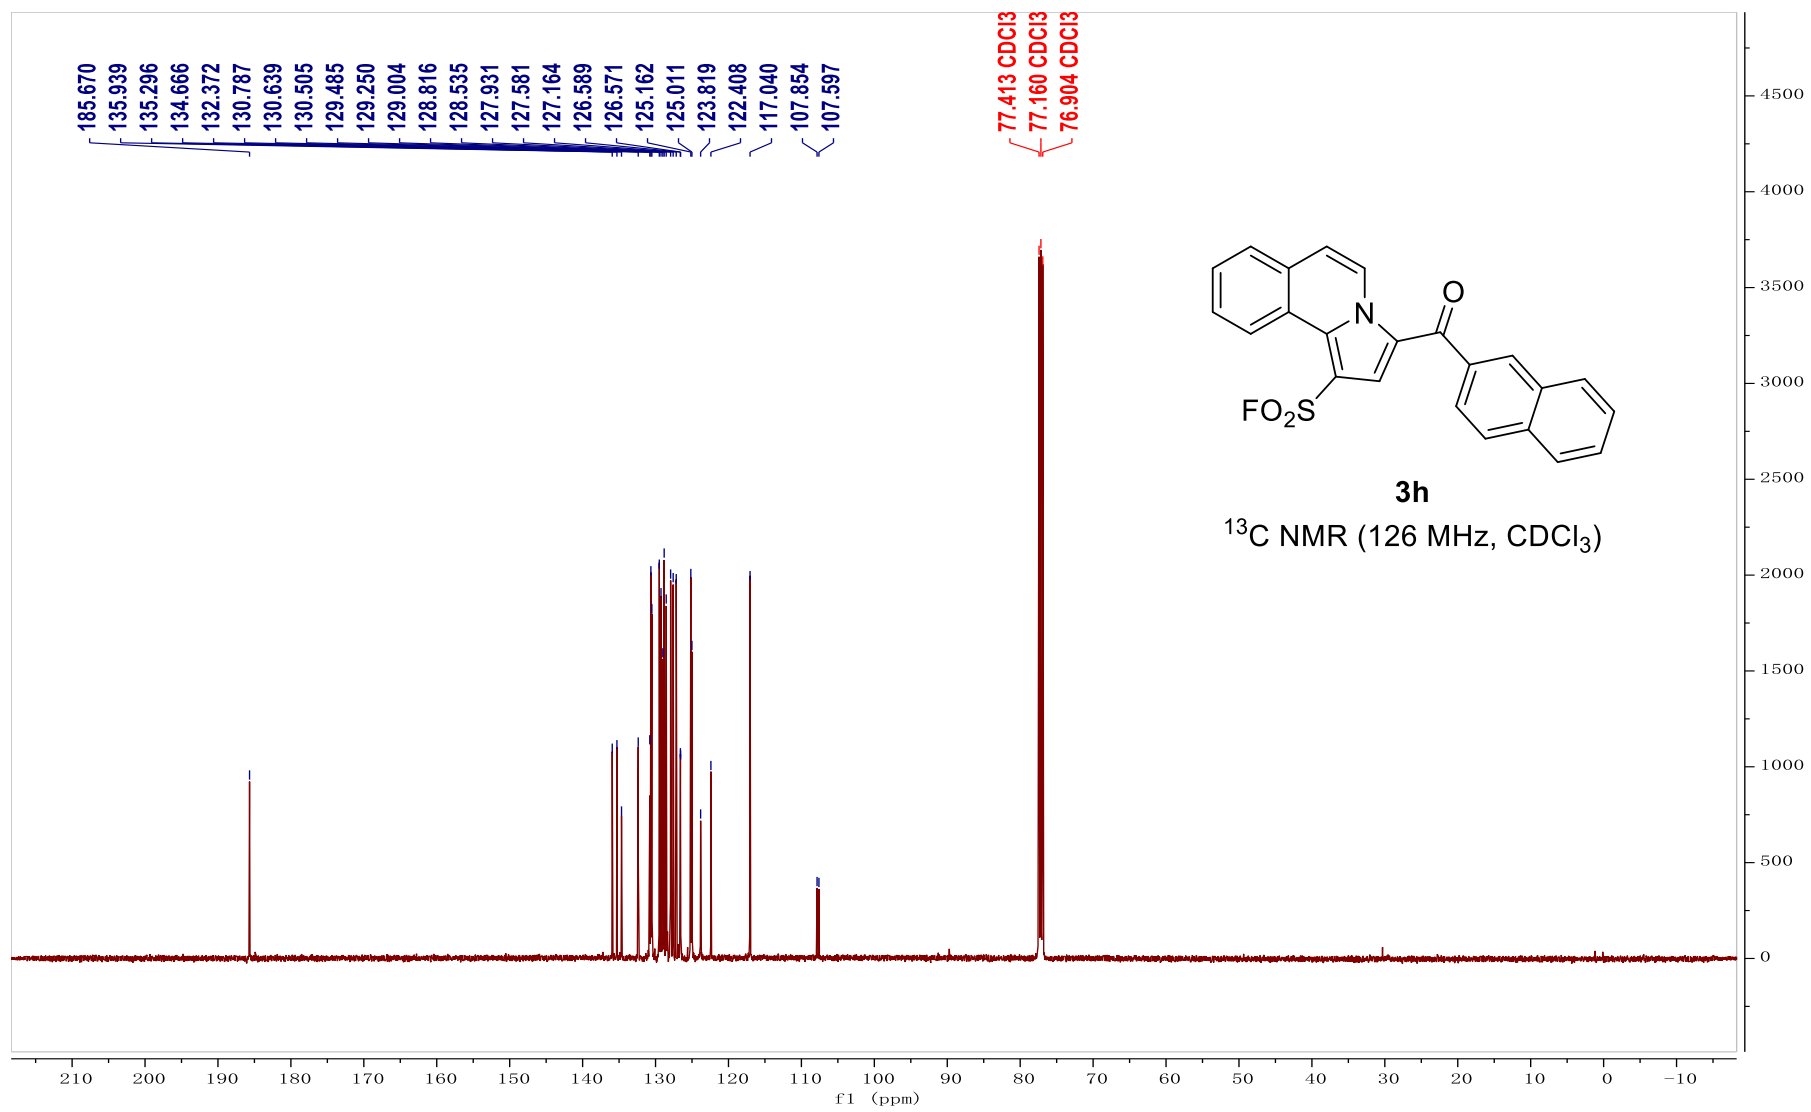

S101

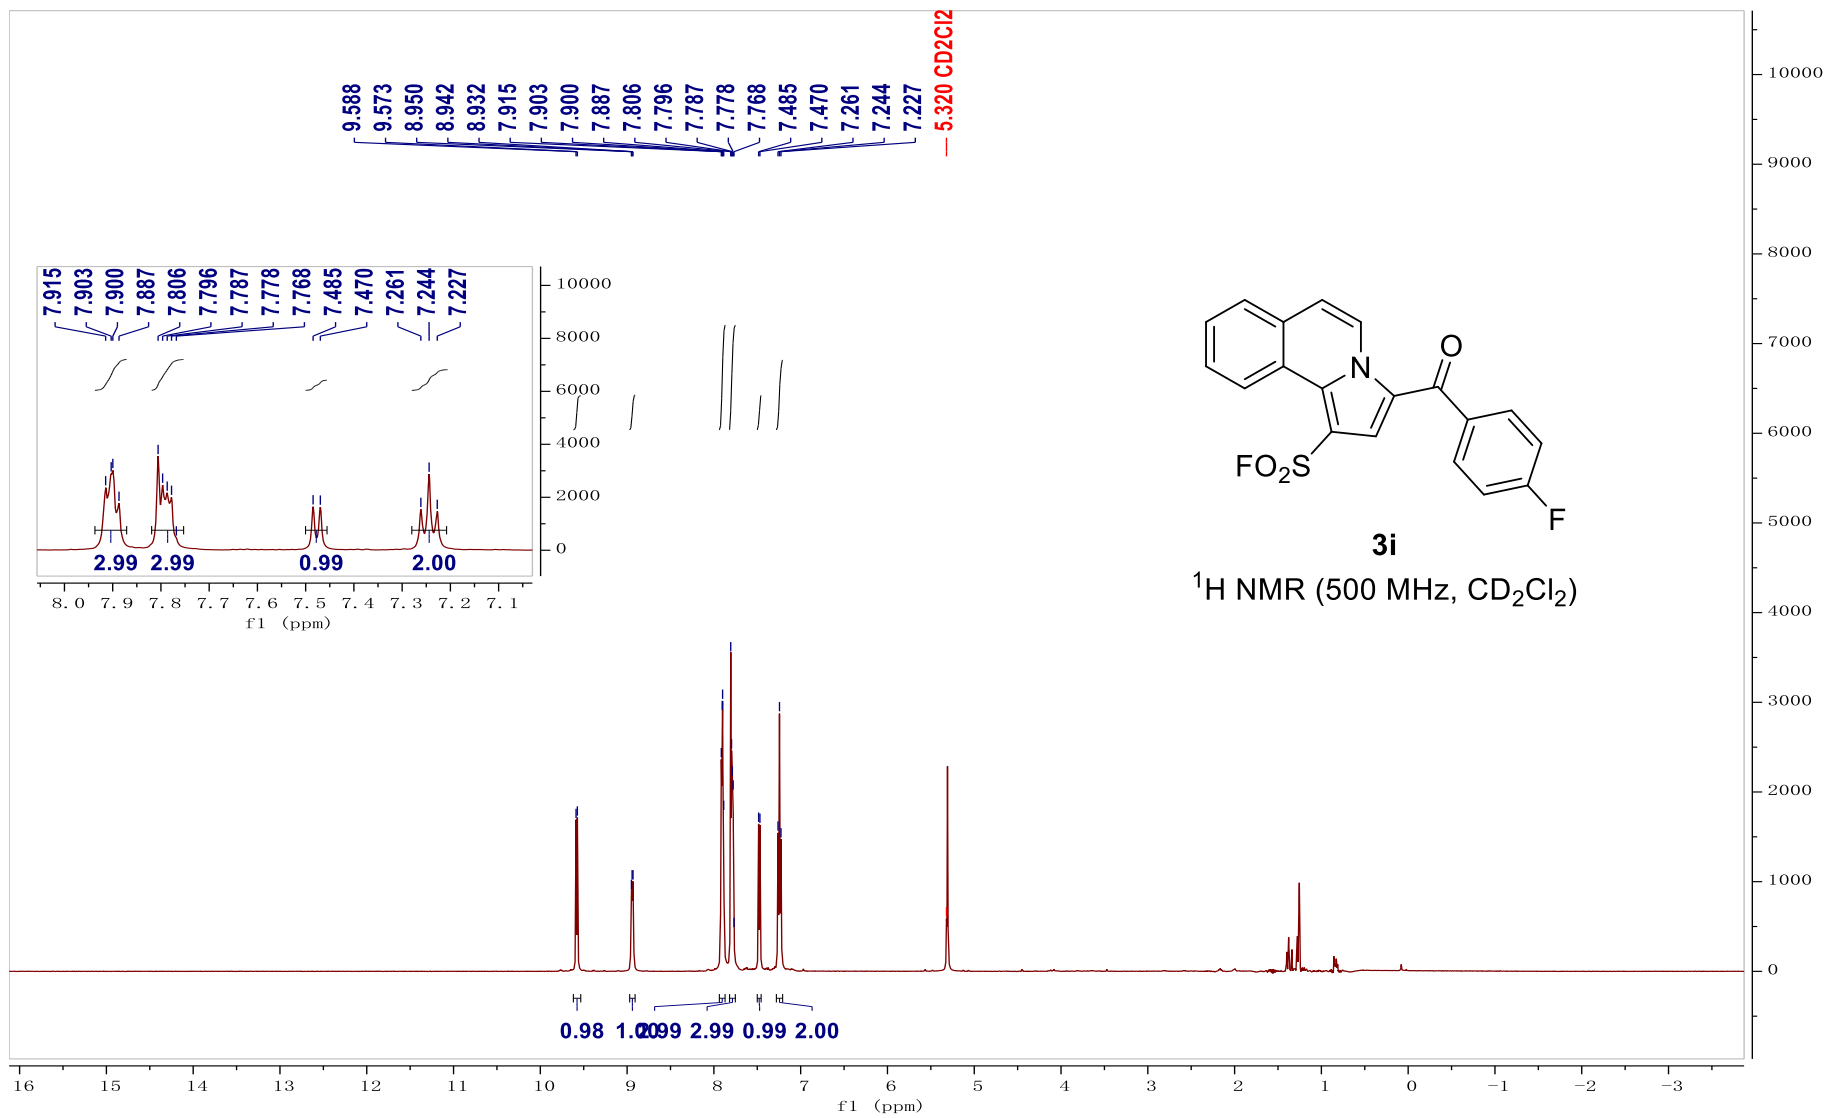

S102



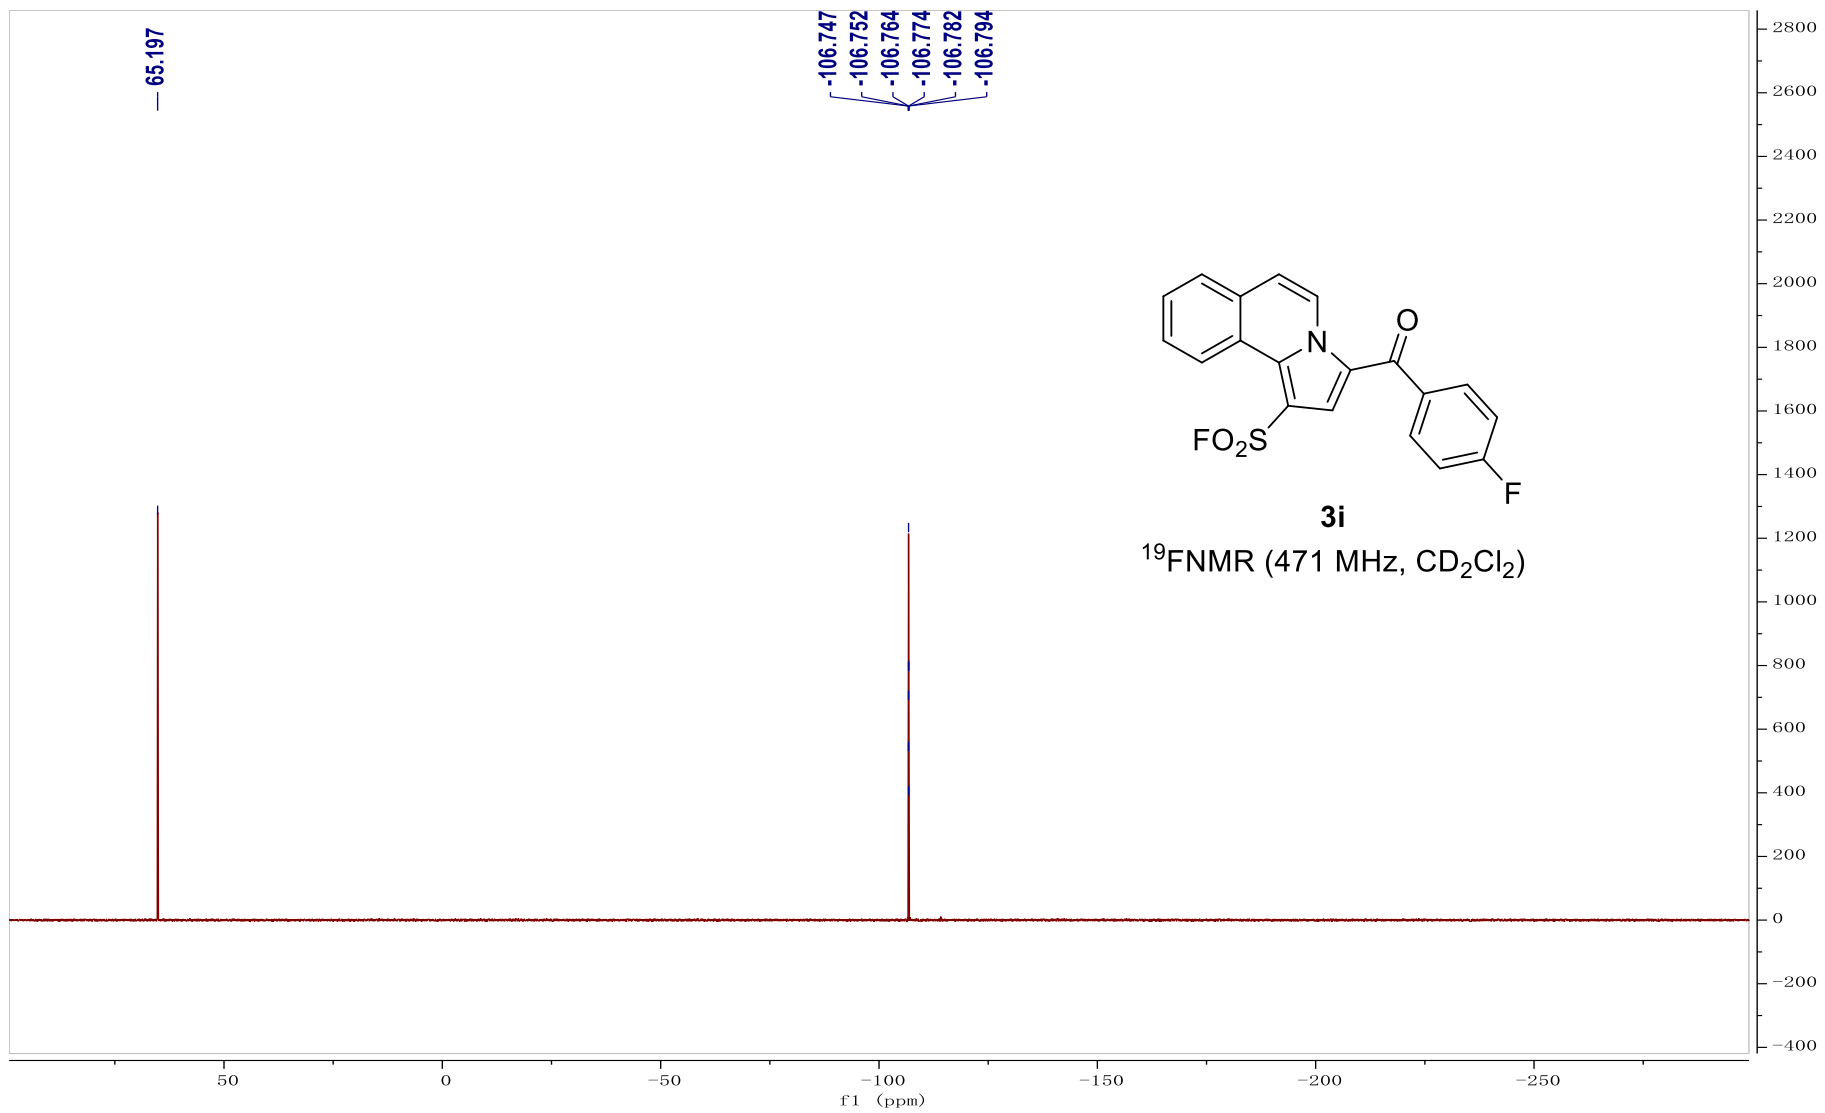

S103

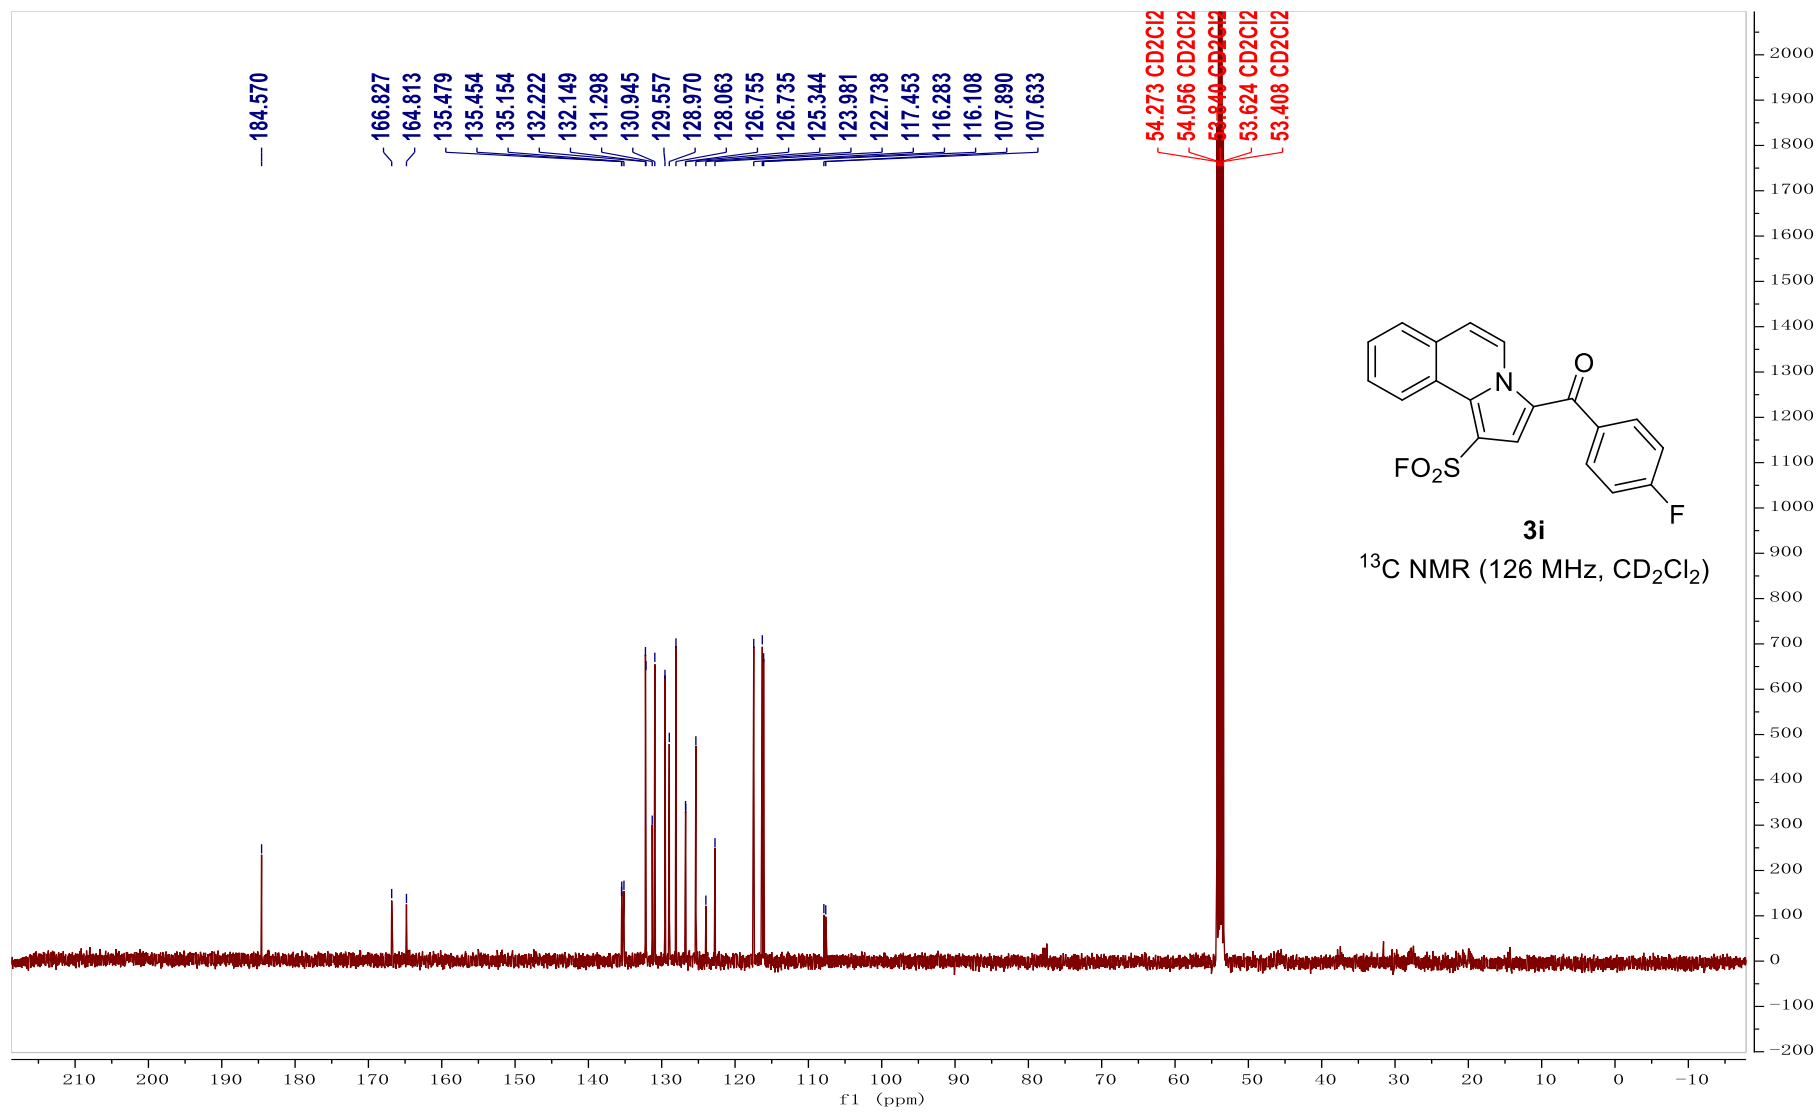

S104

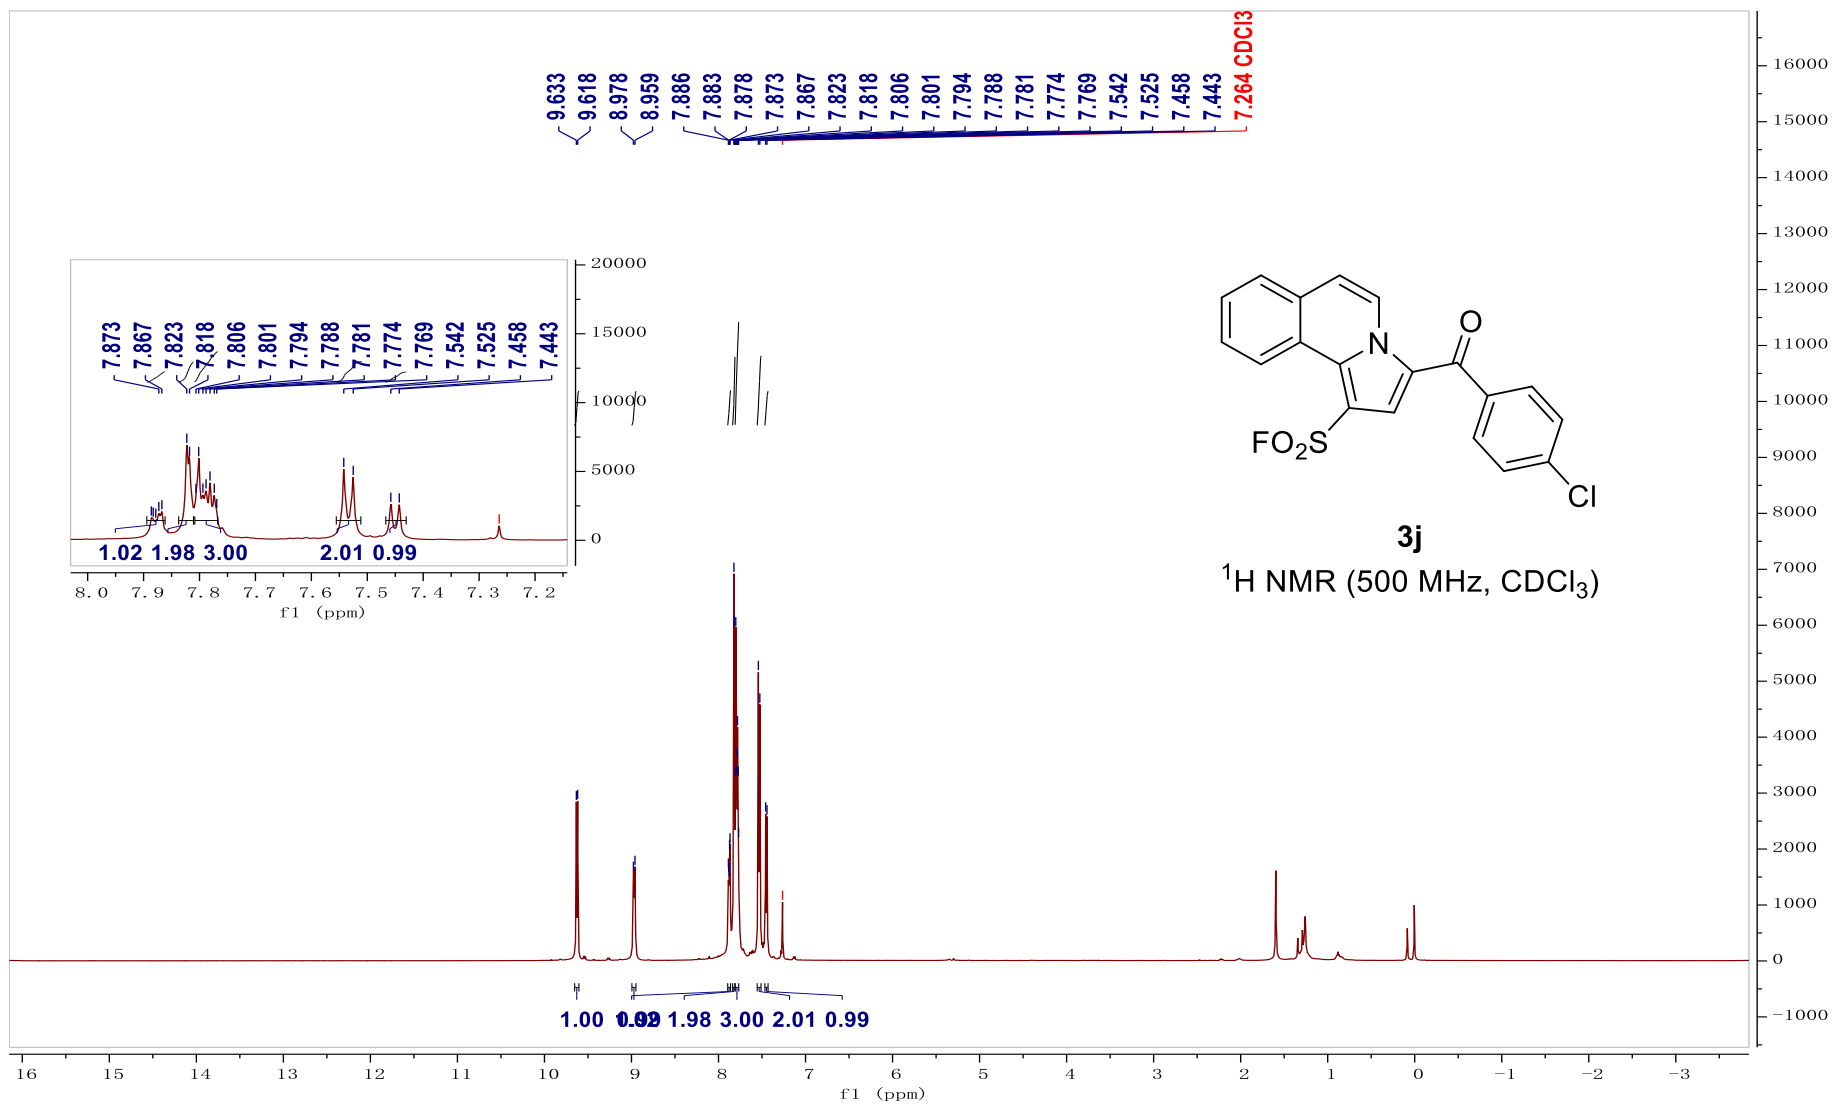

S105

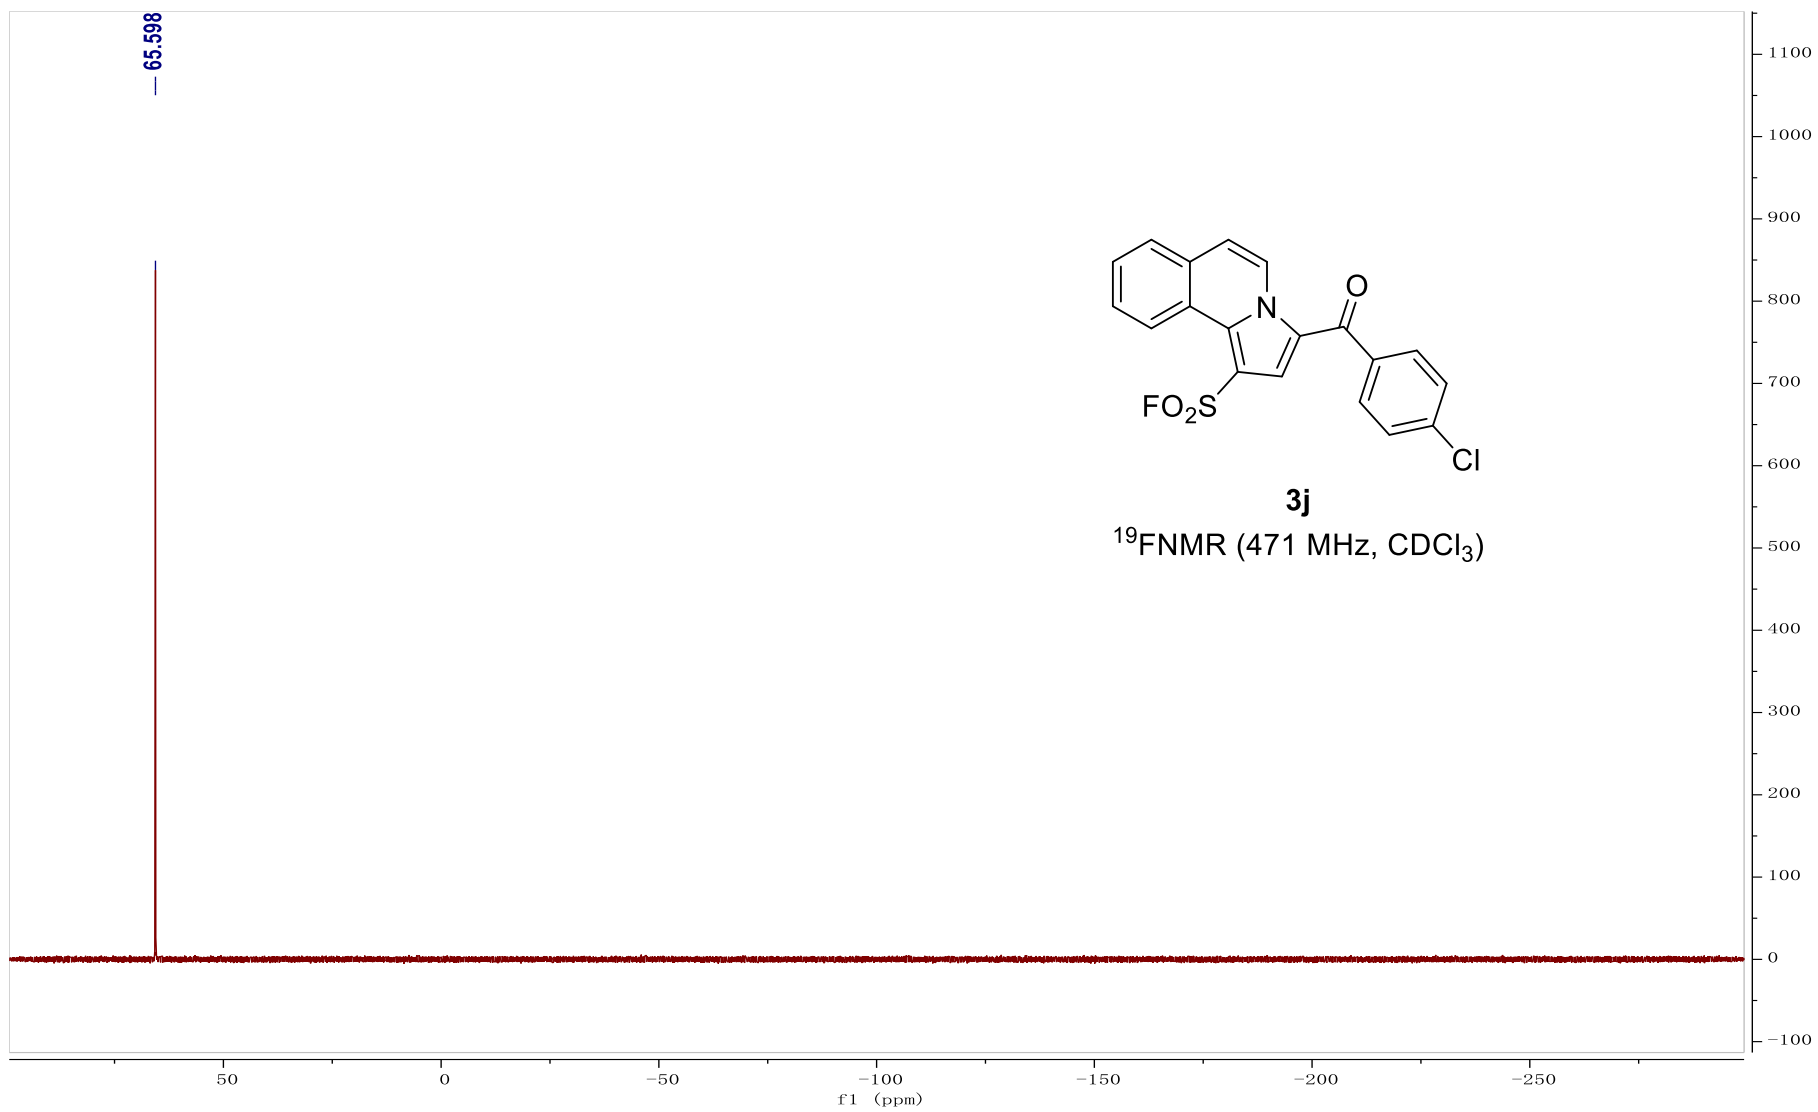

S106

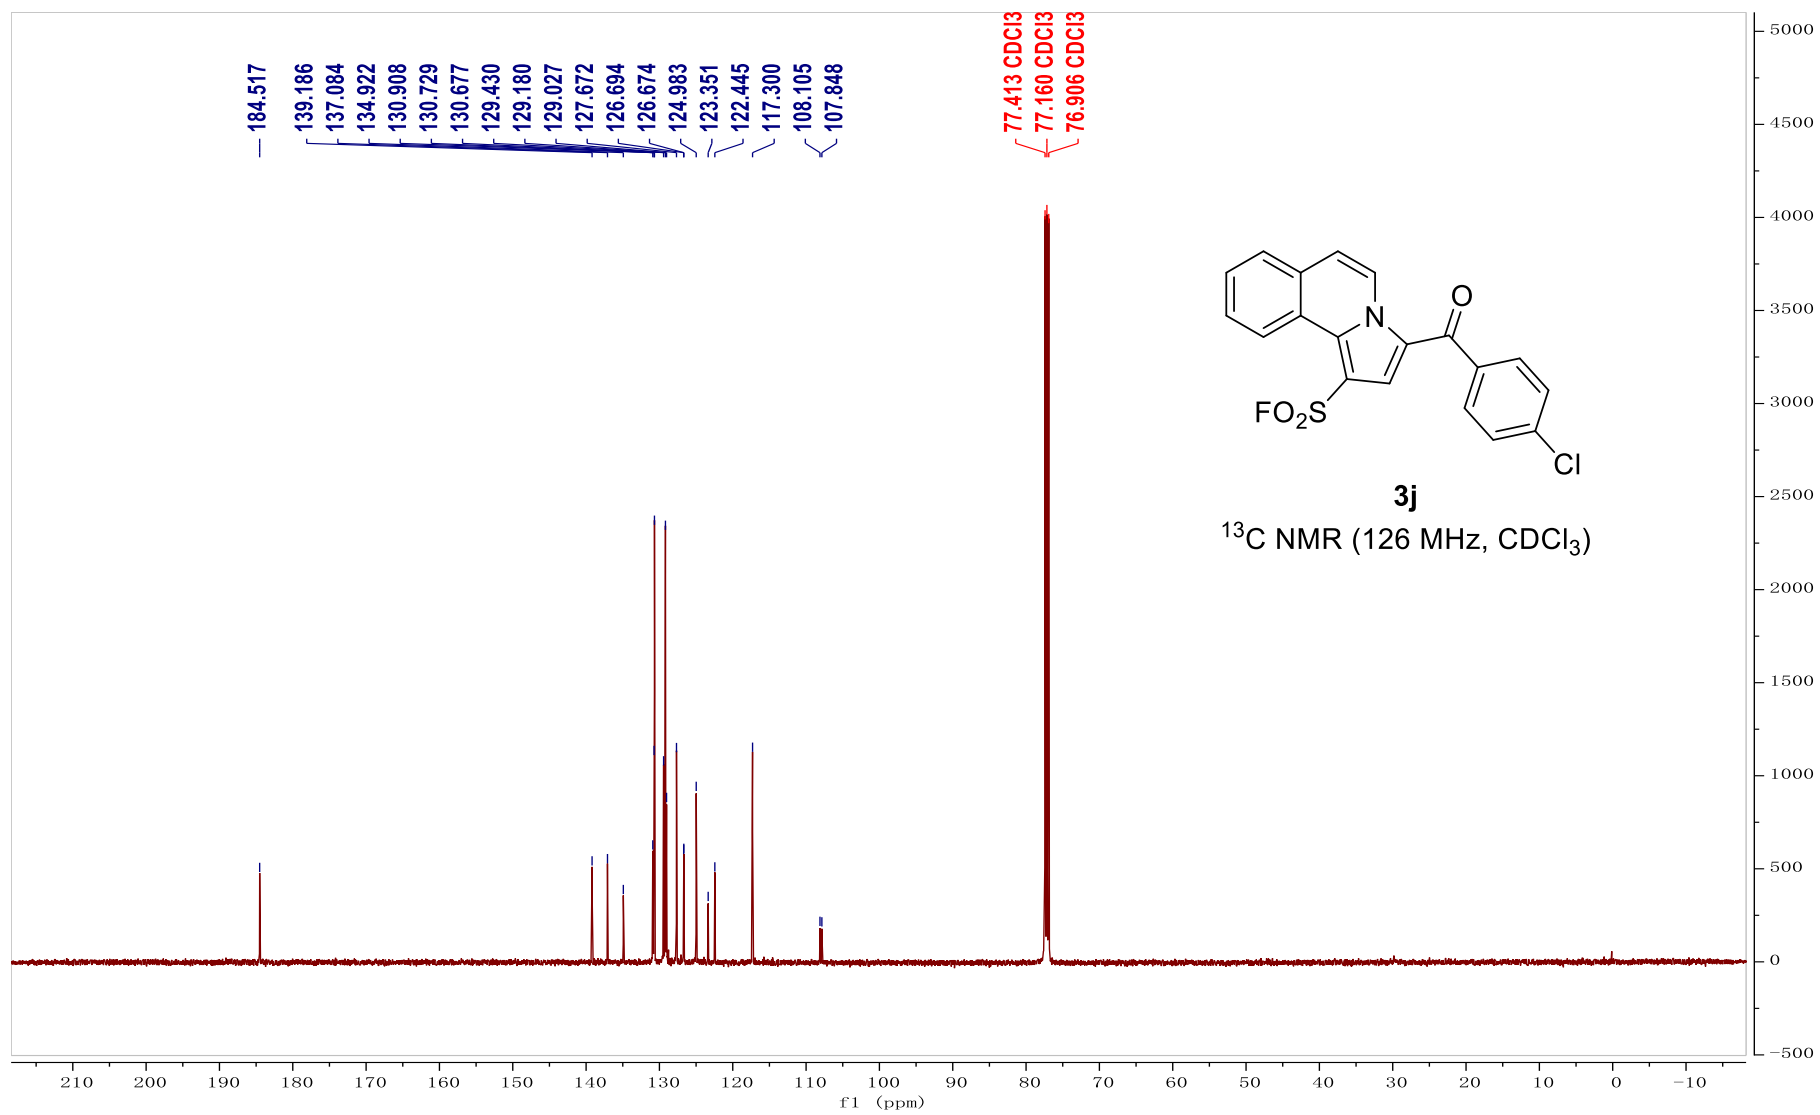

S107

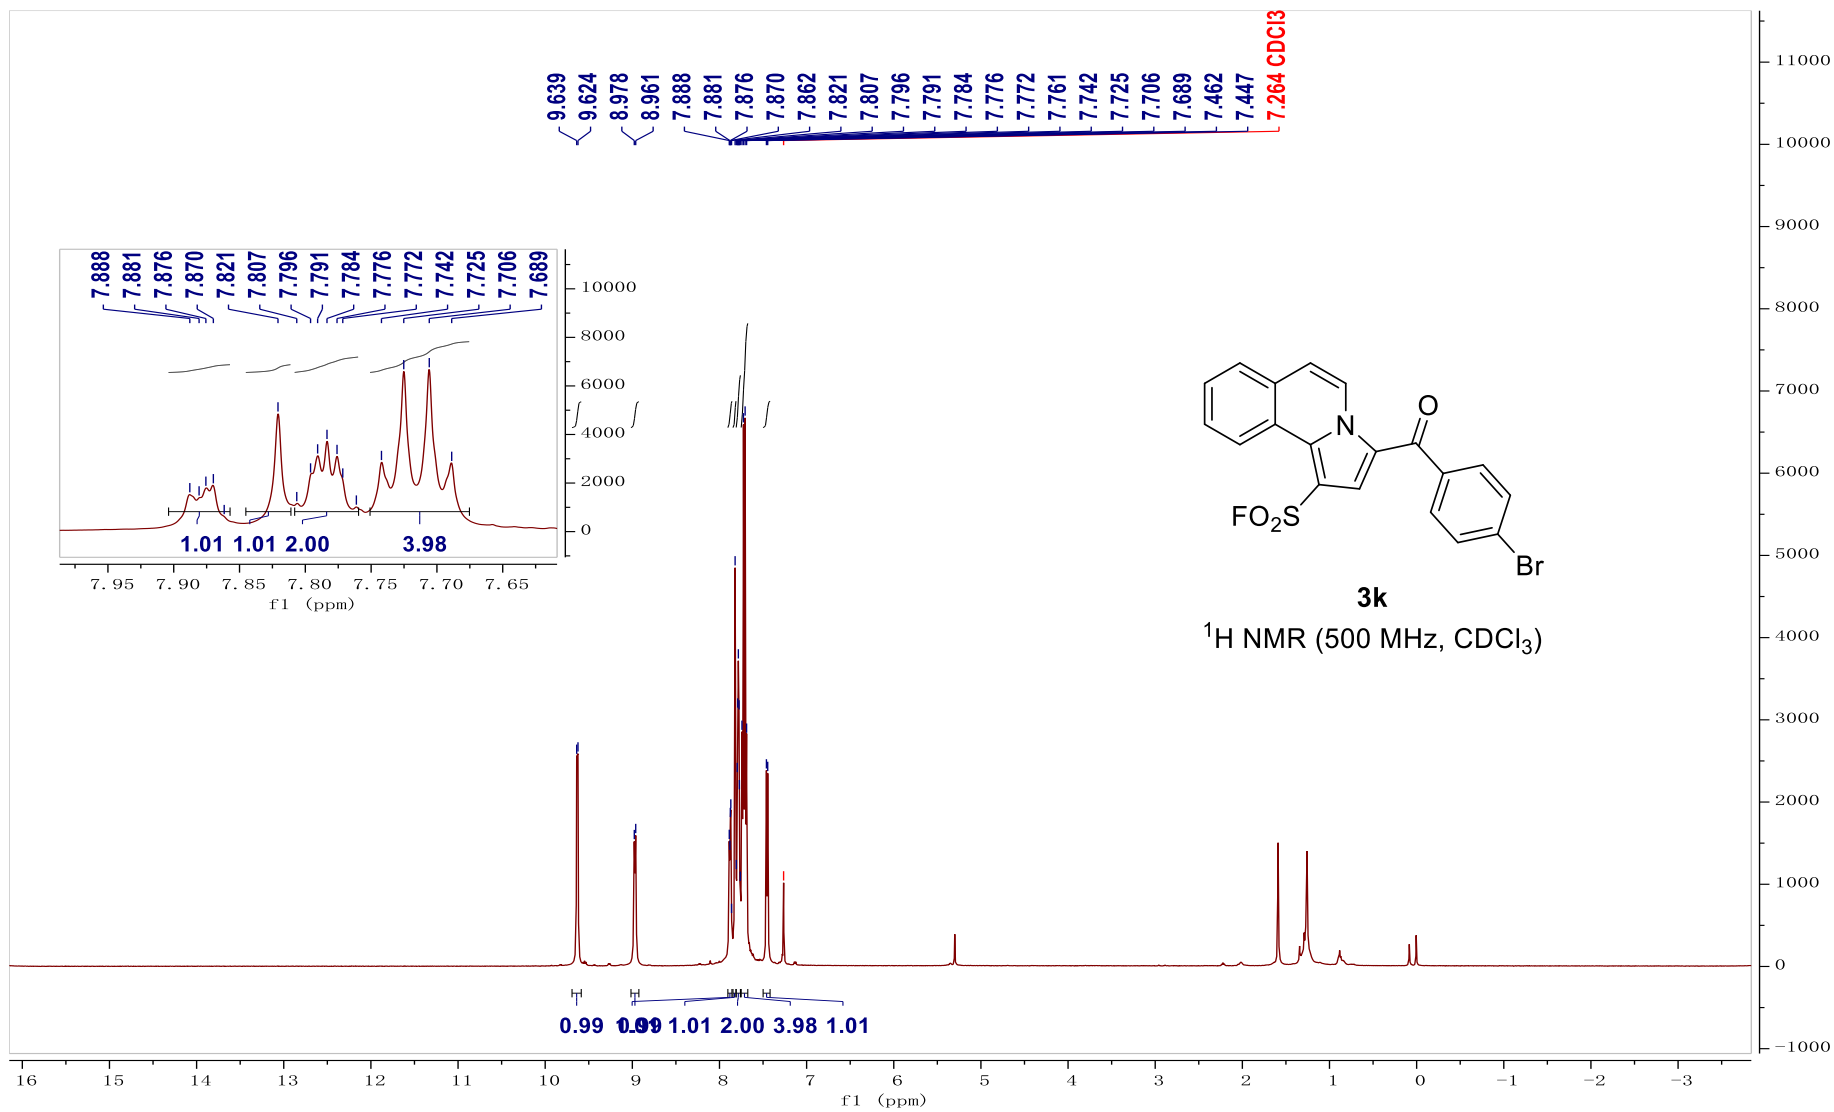

S108

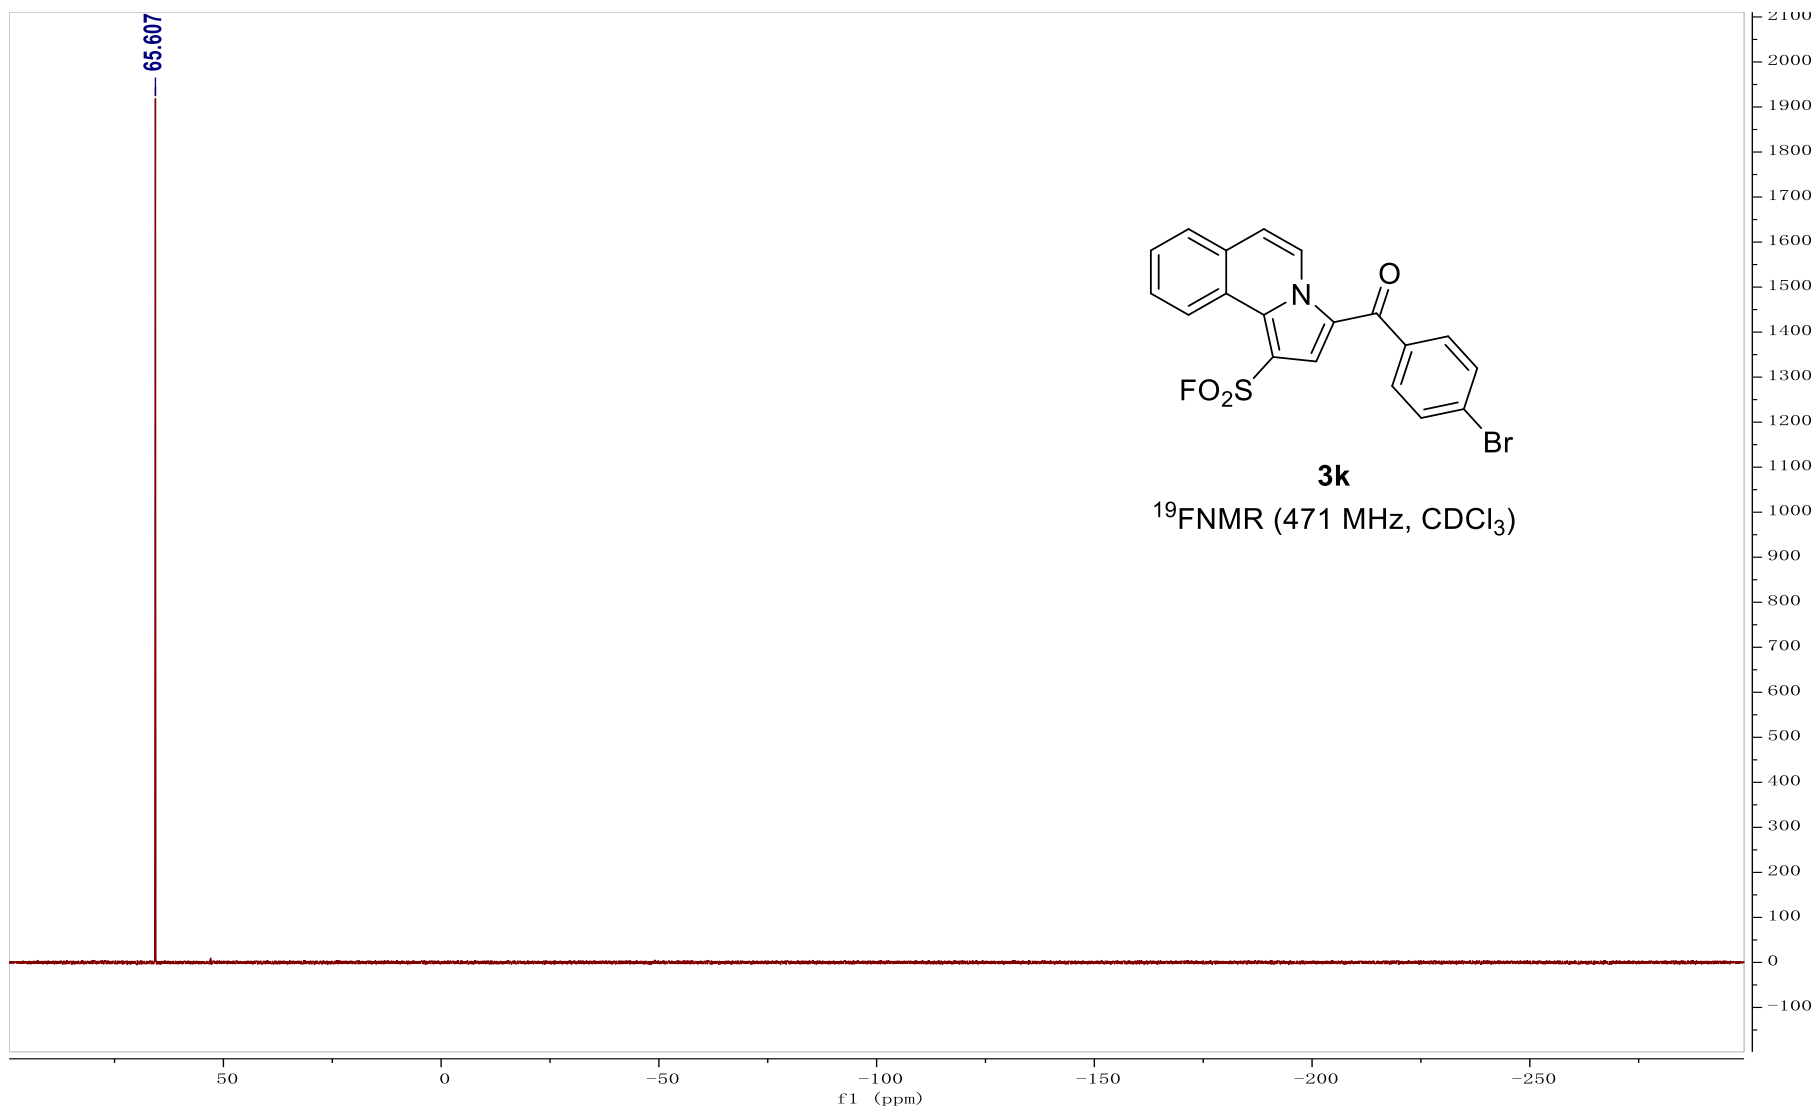

S109

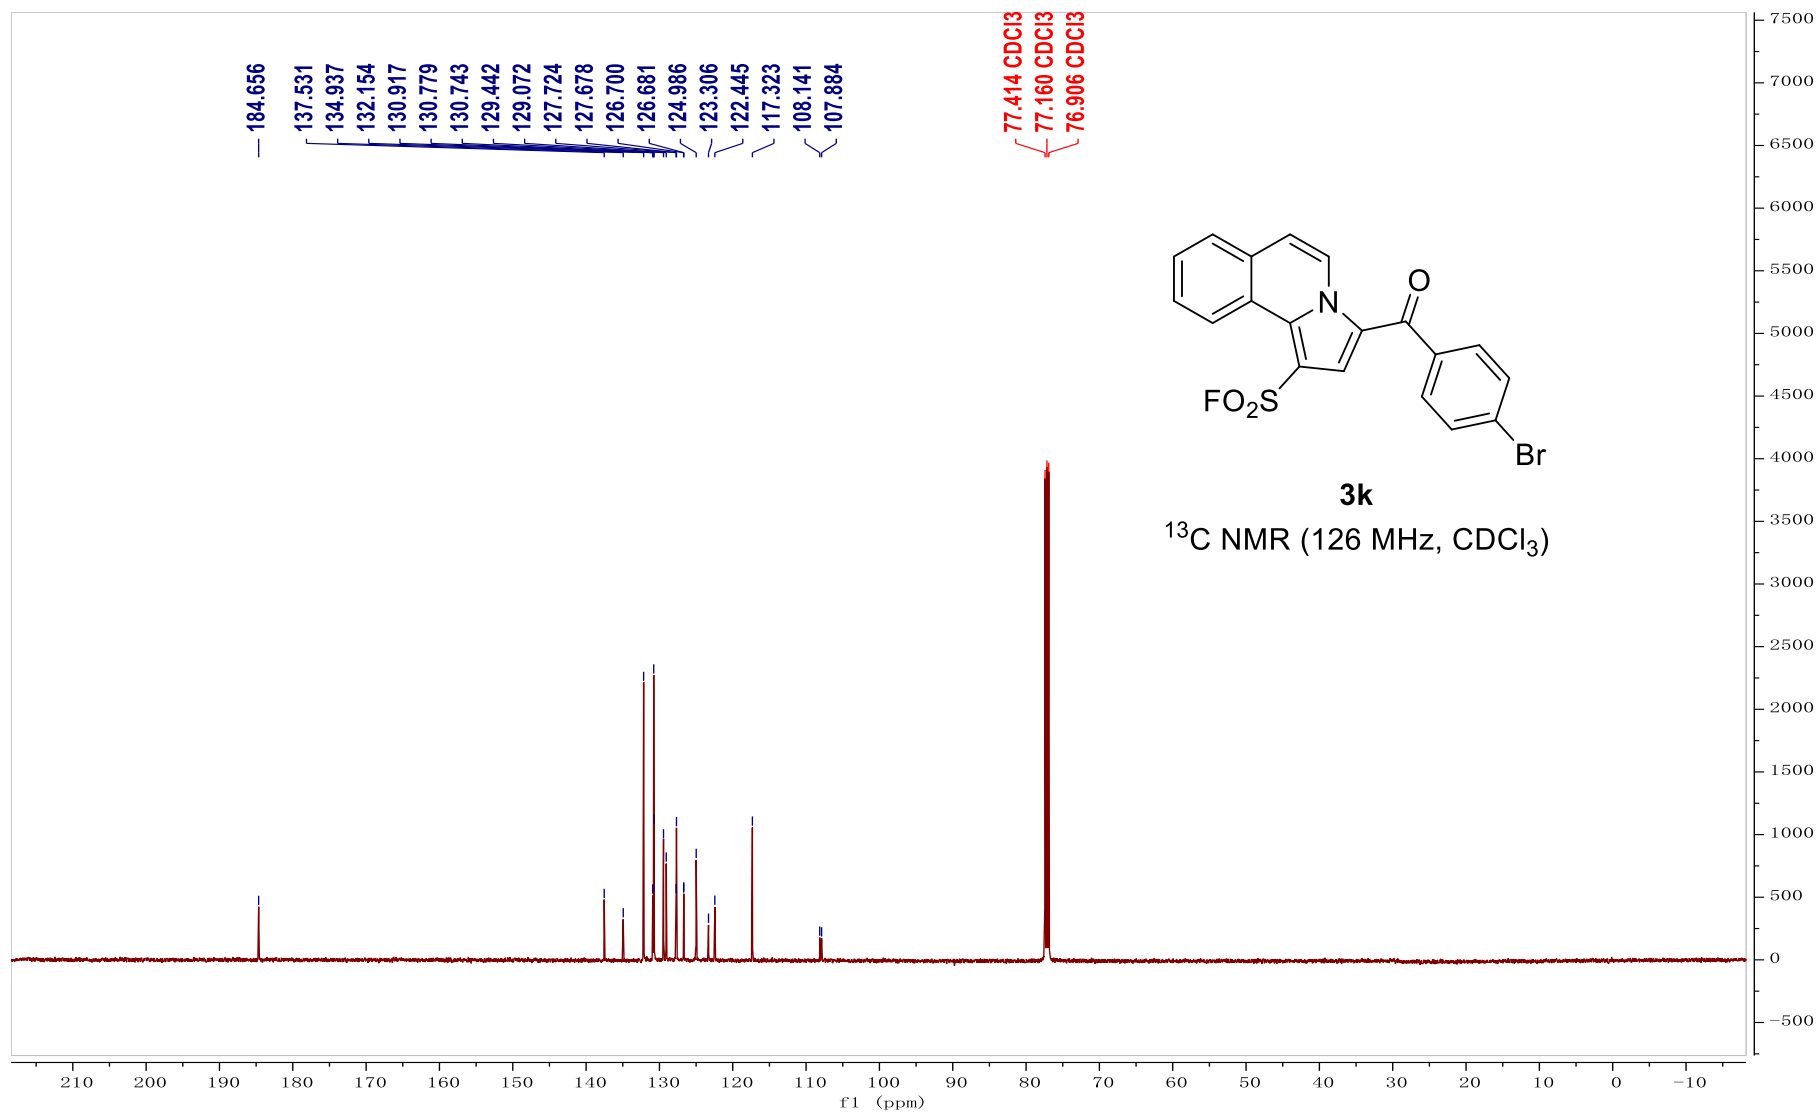

S110



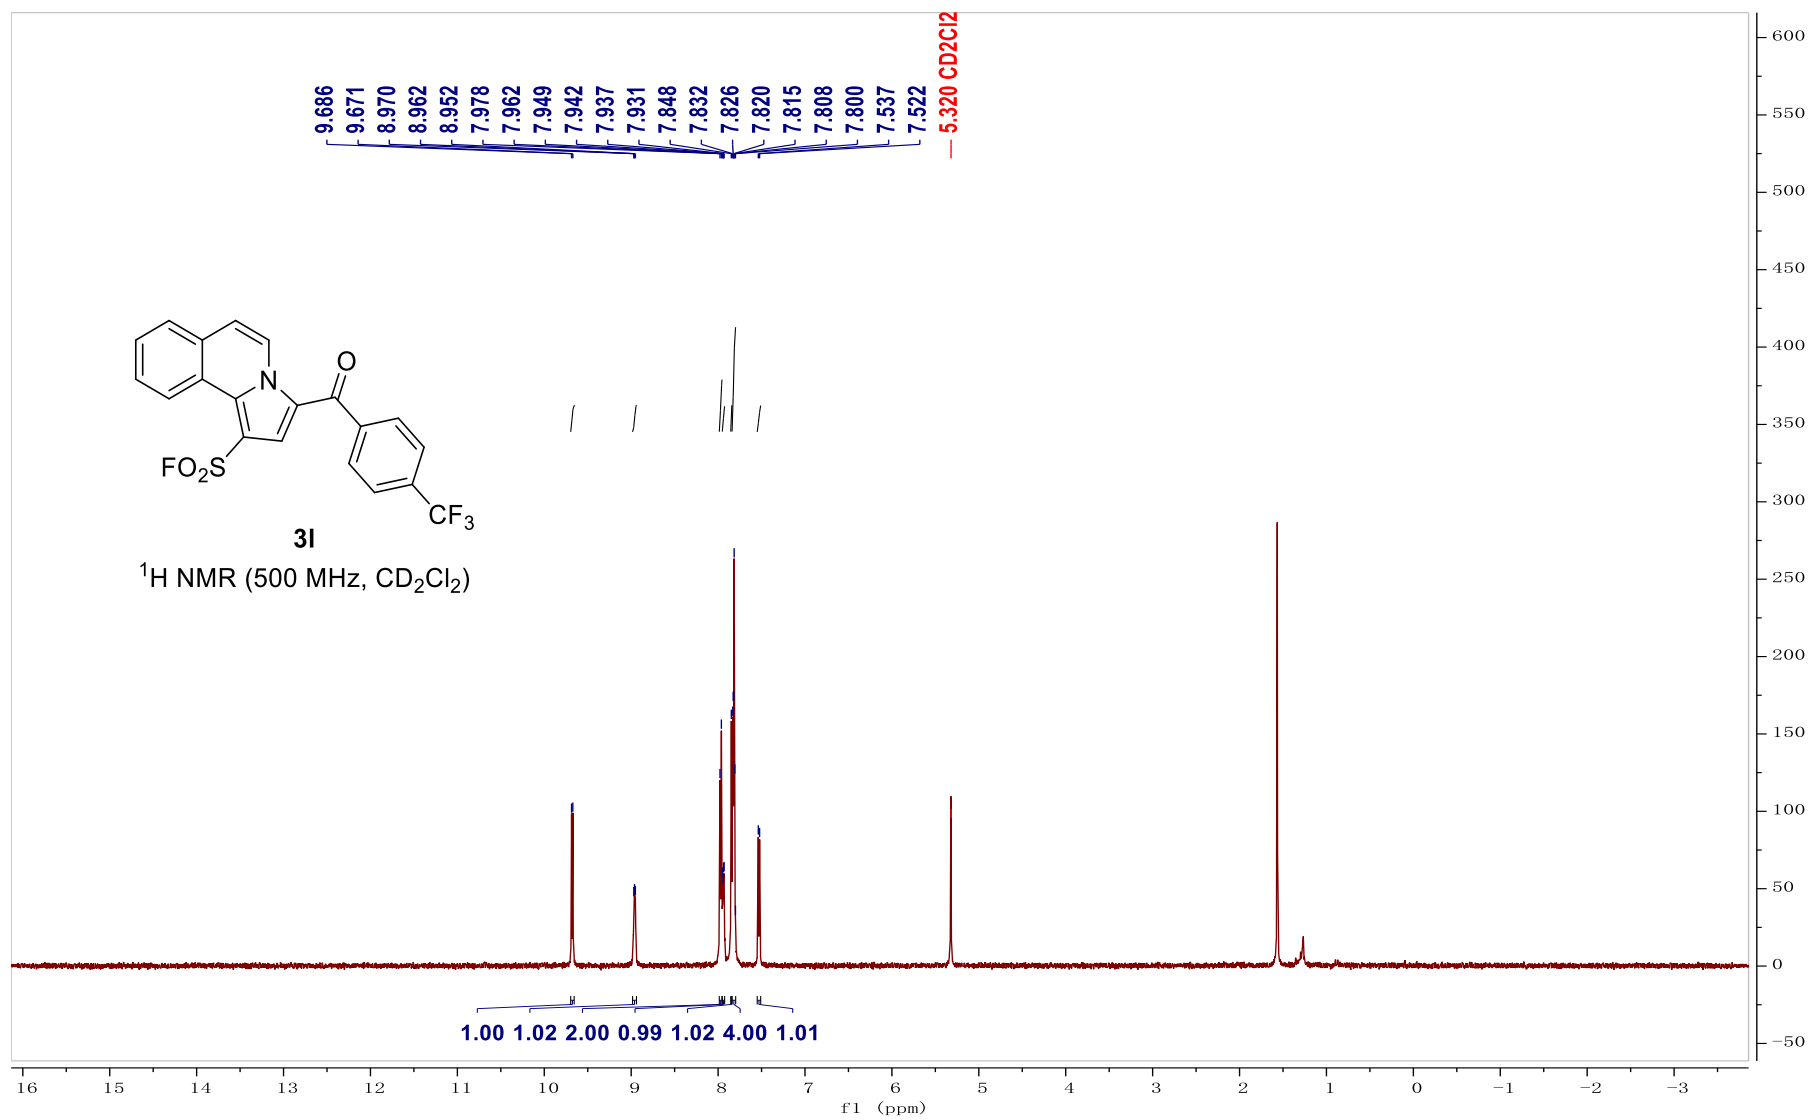

S111

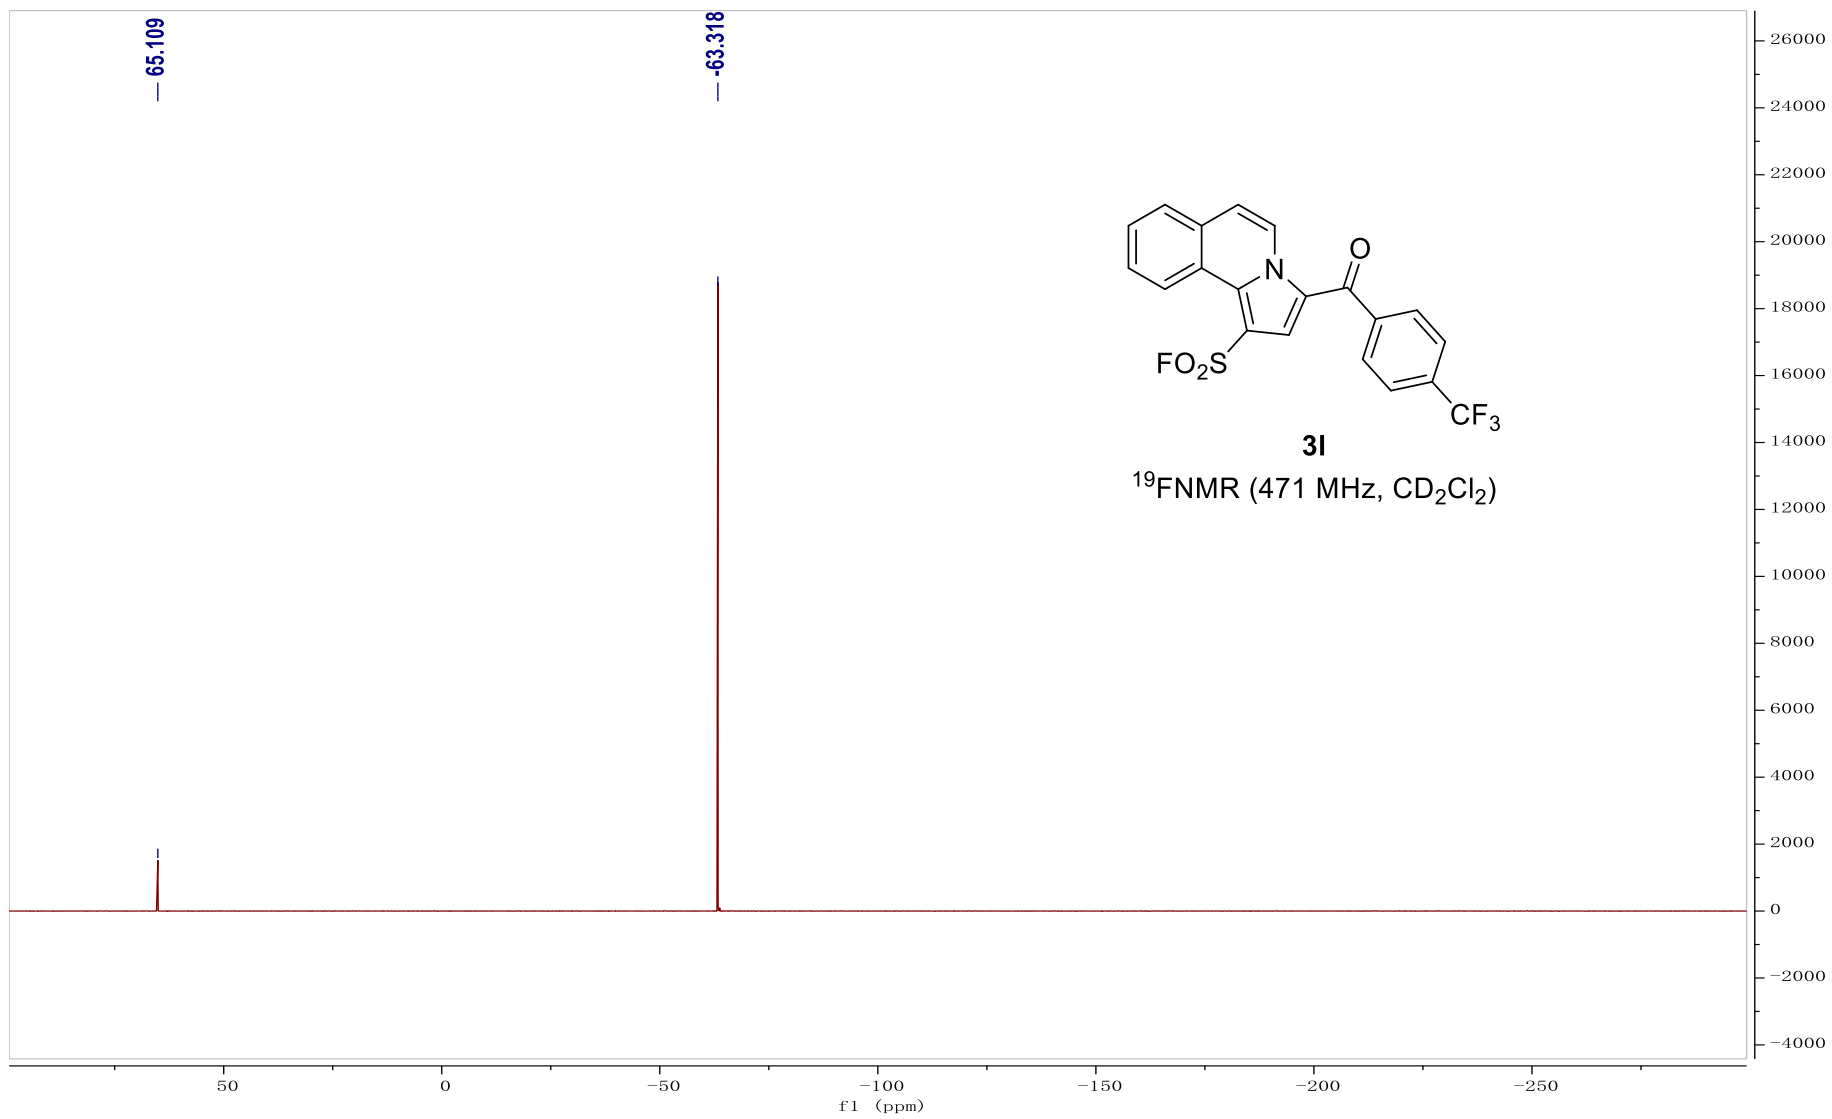

S112

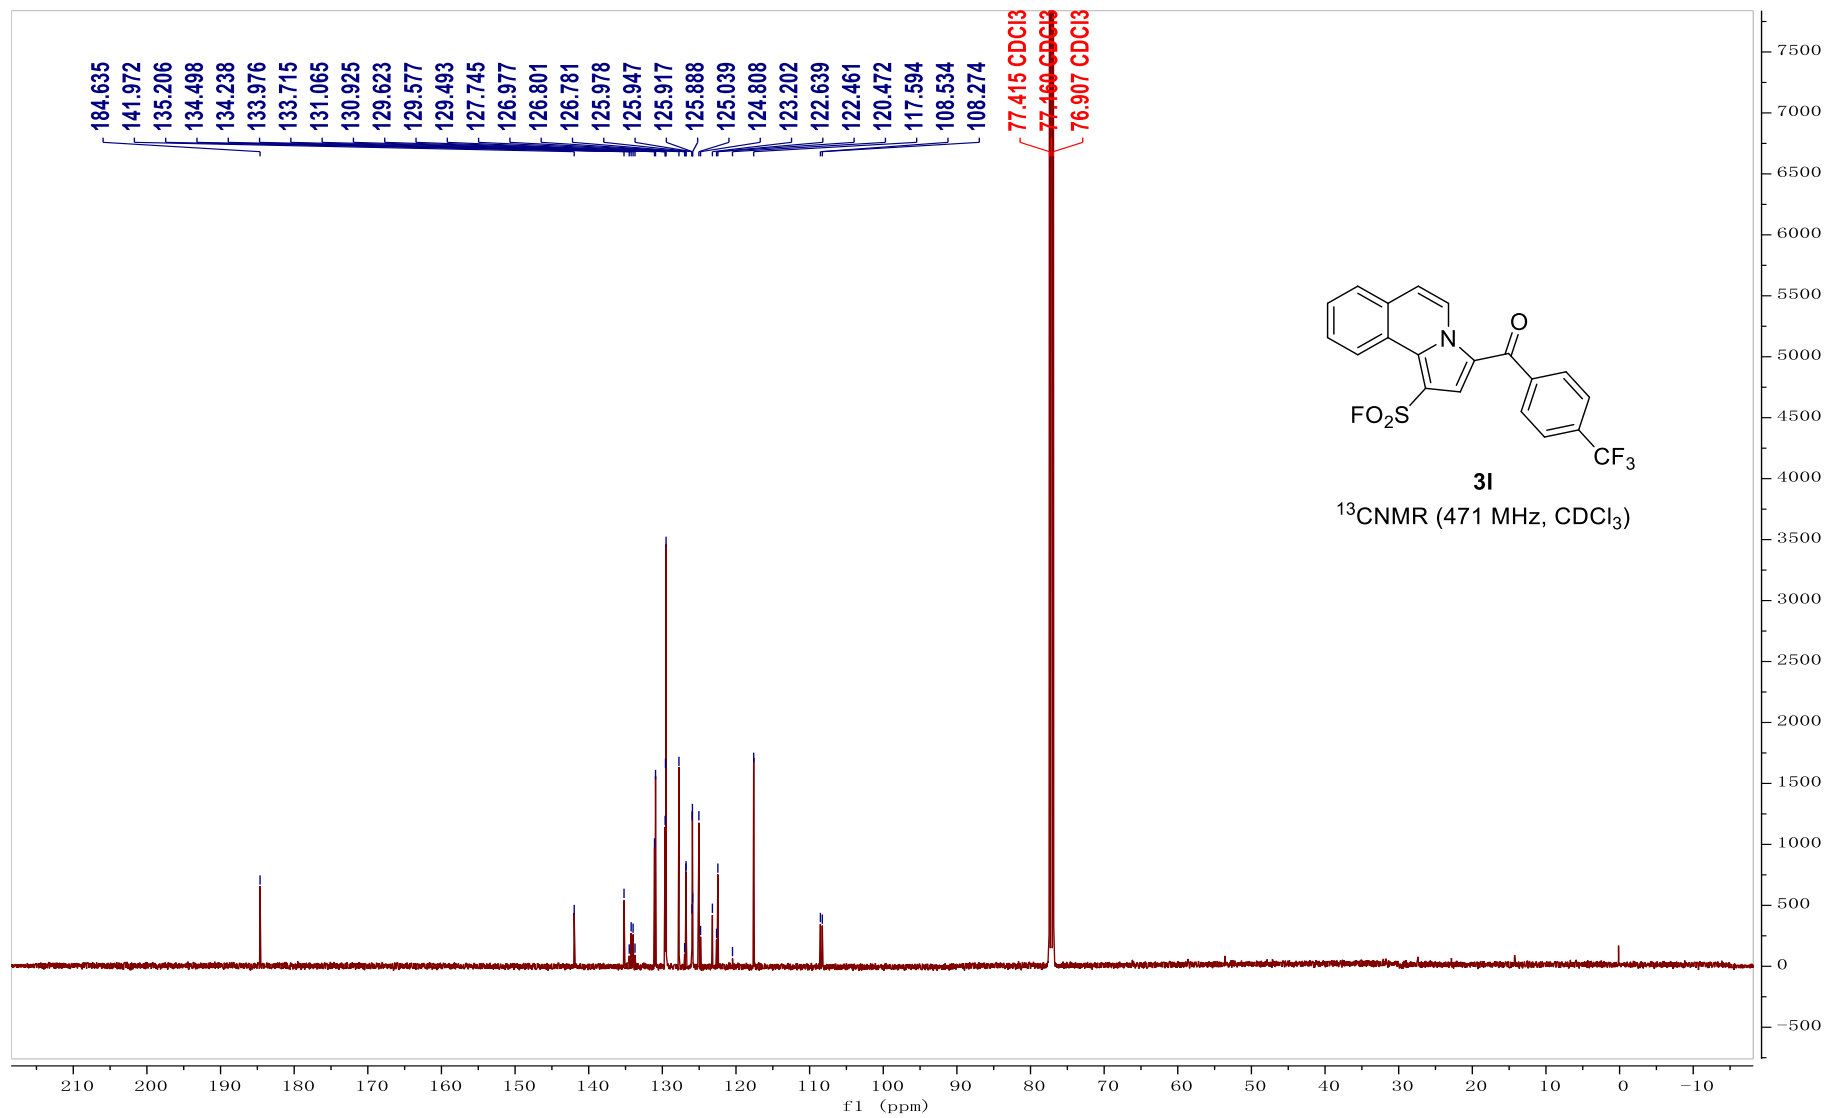

S113

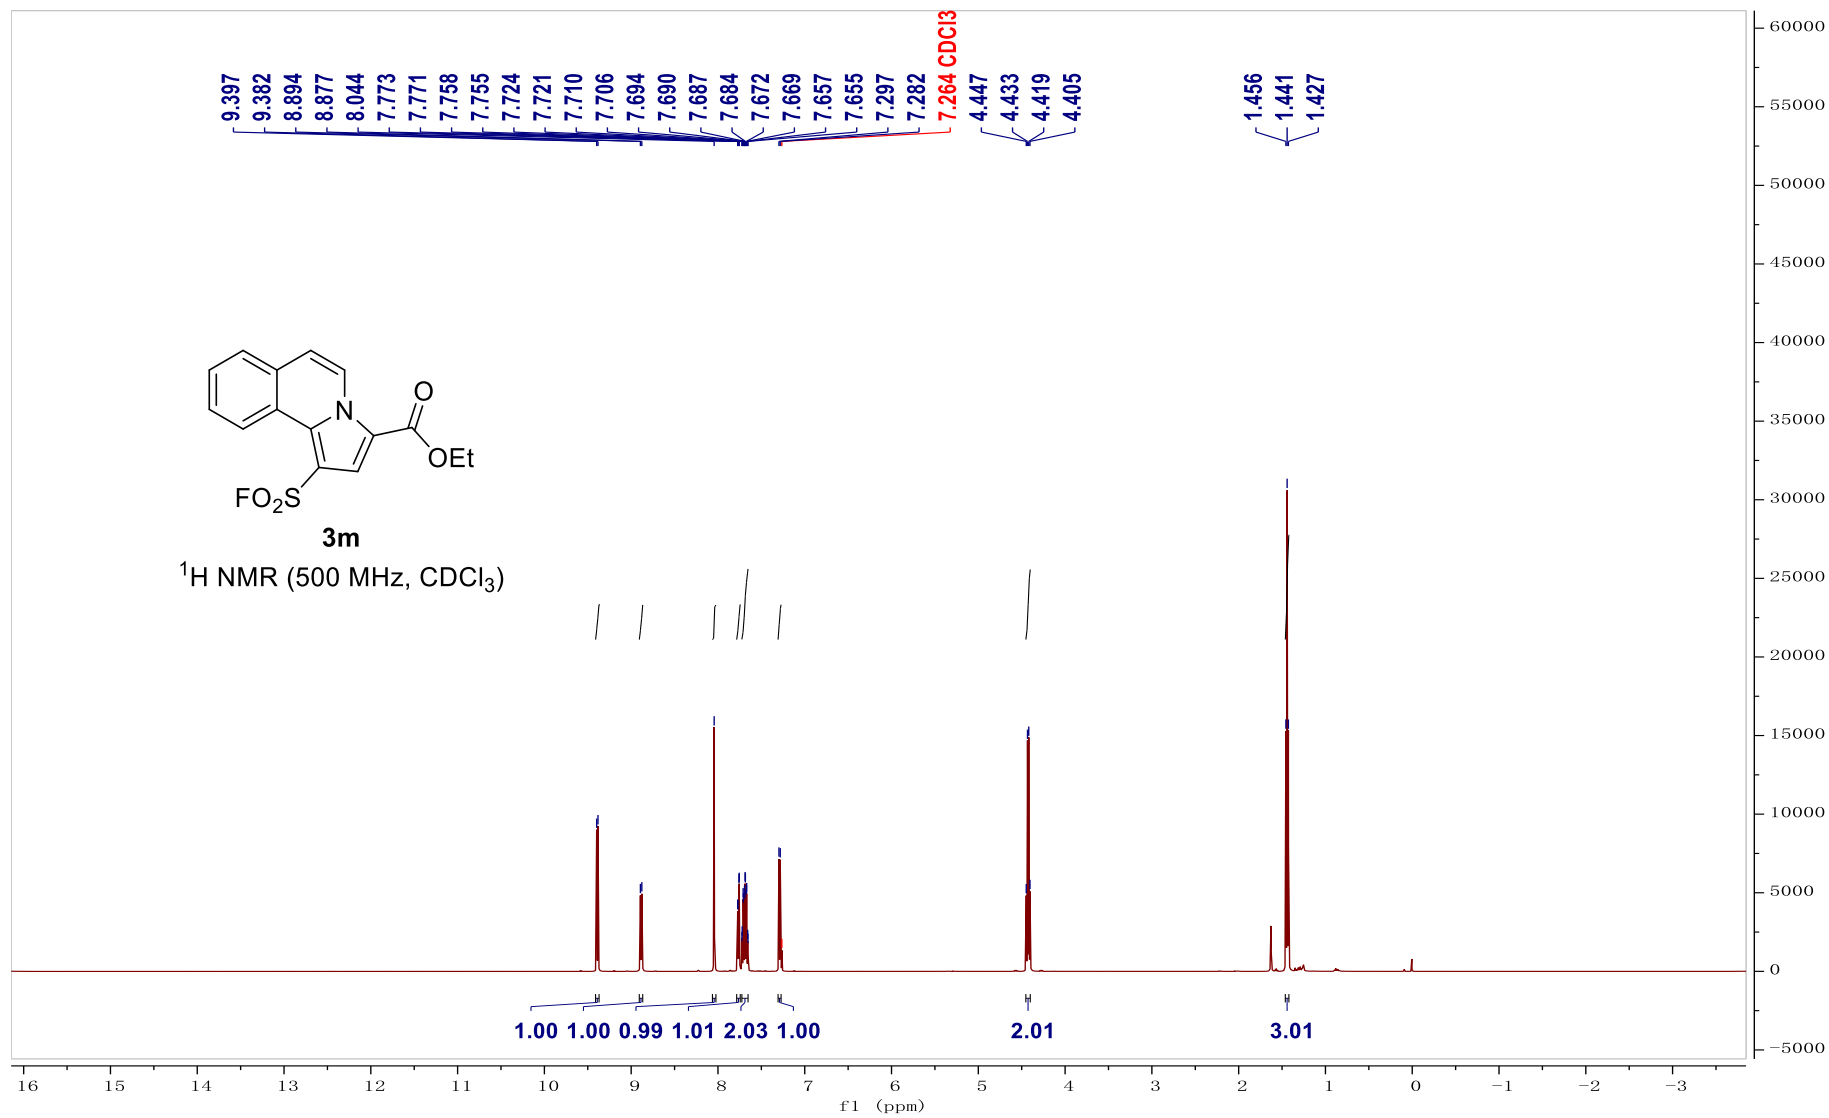

S114

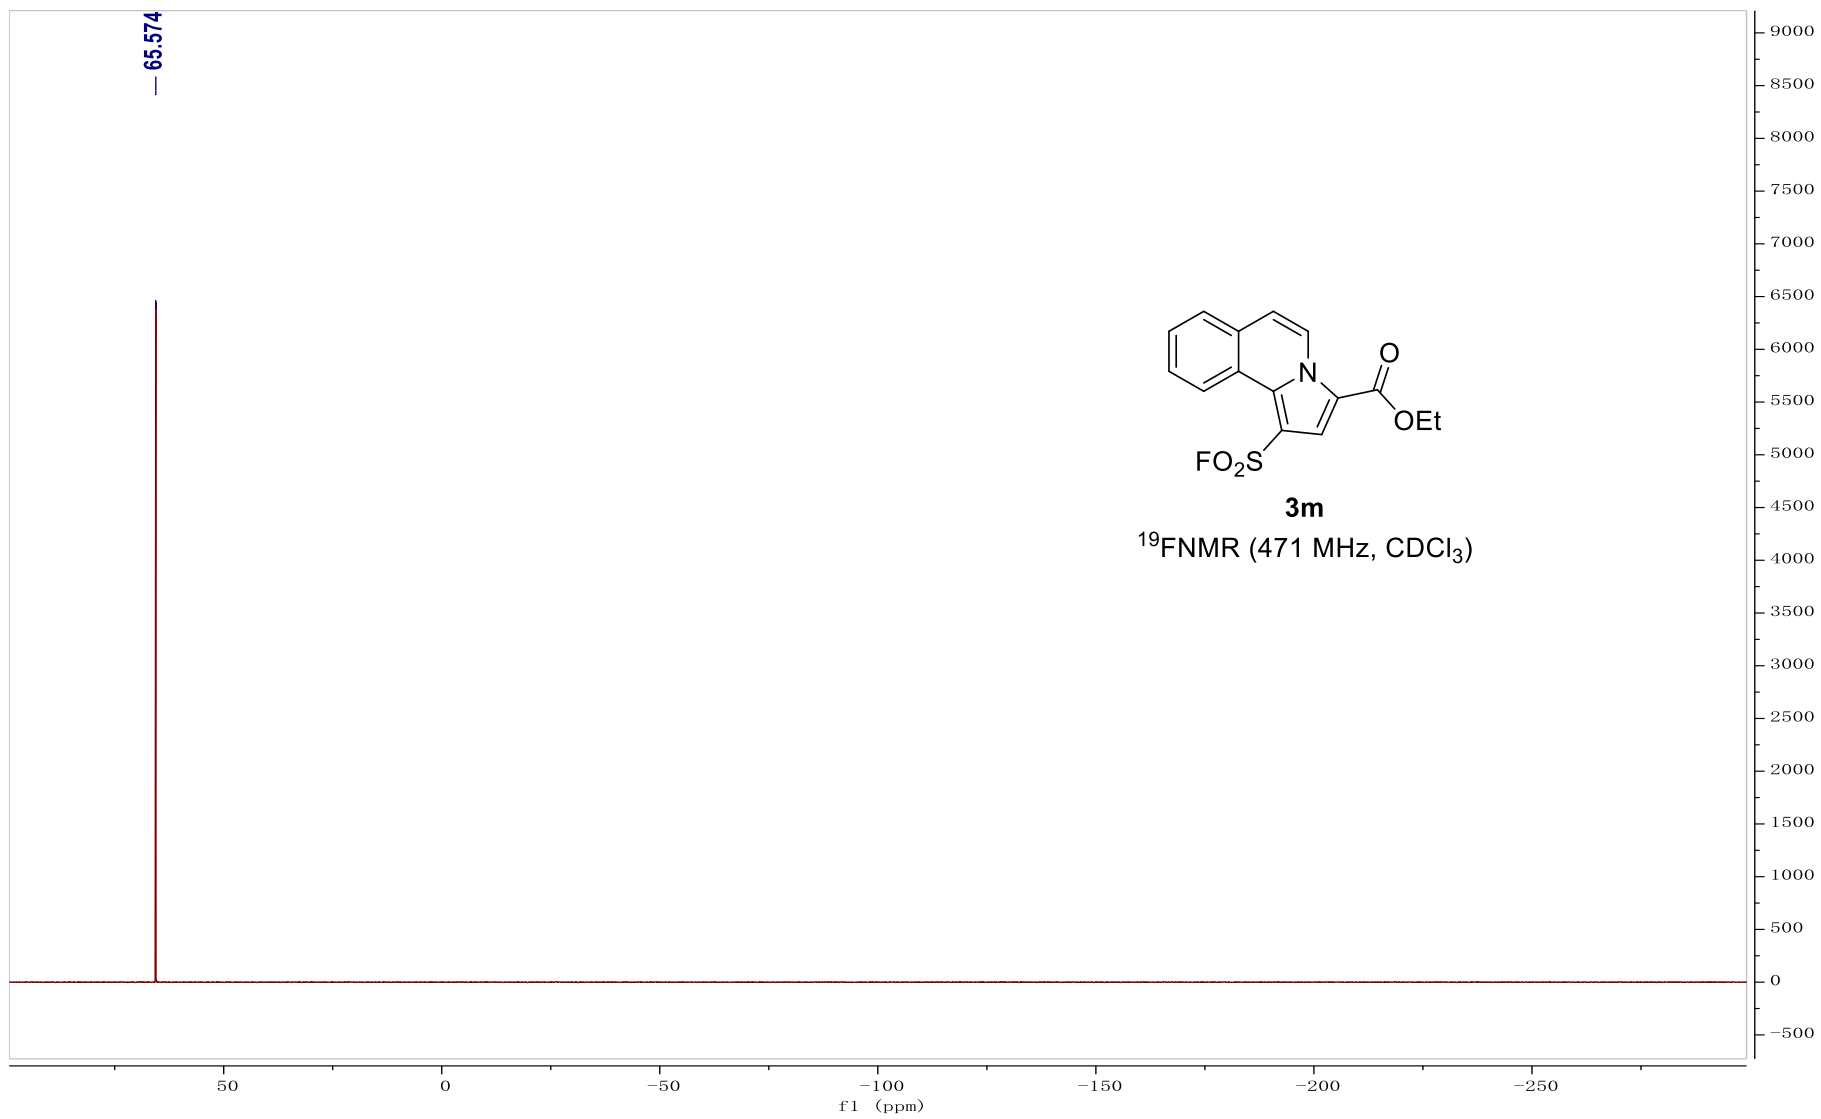

S115

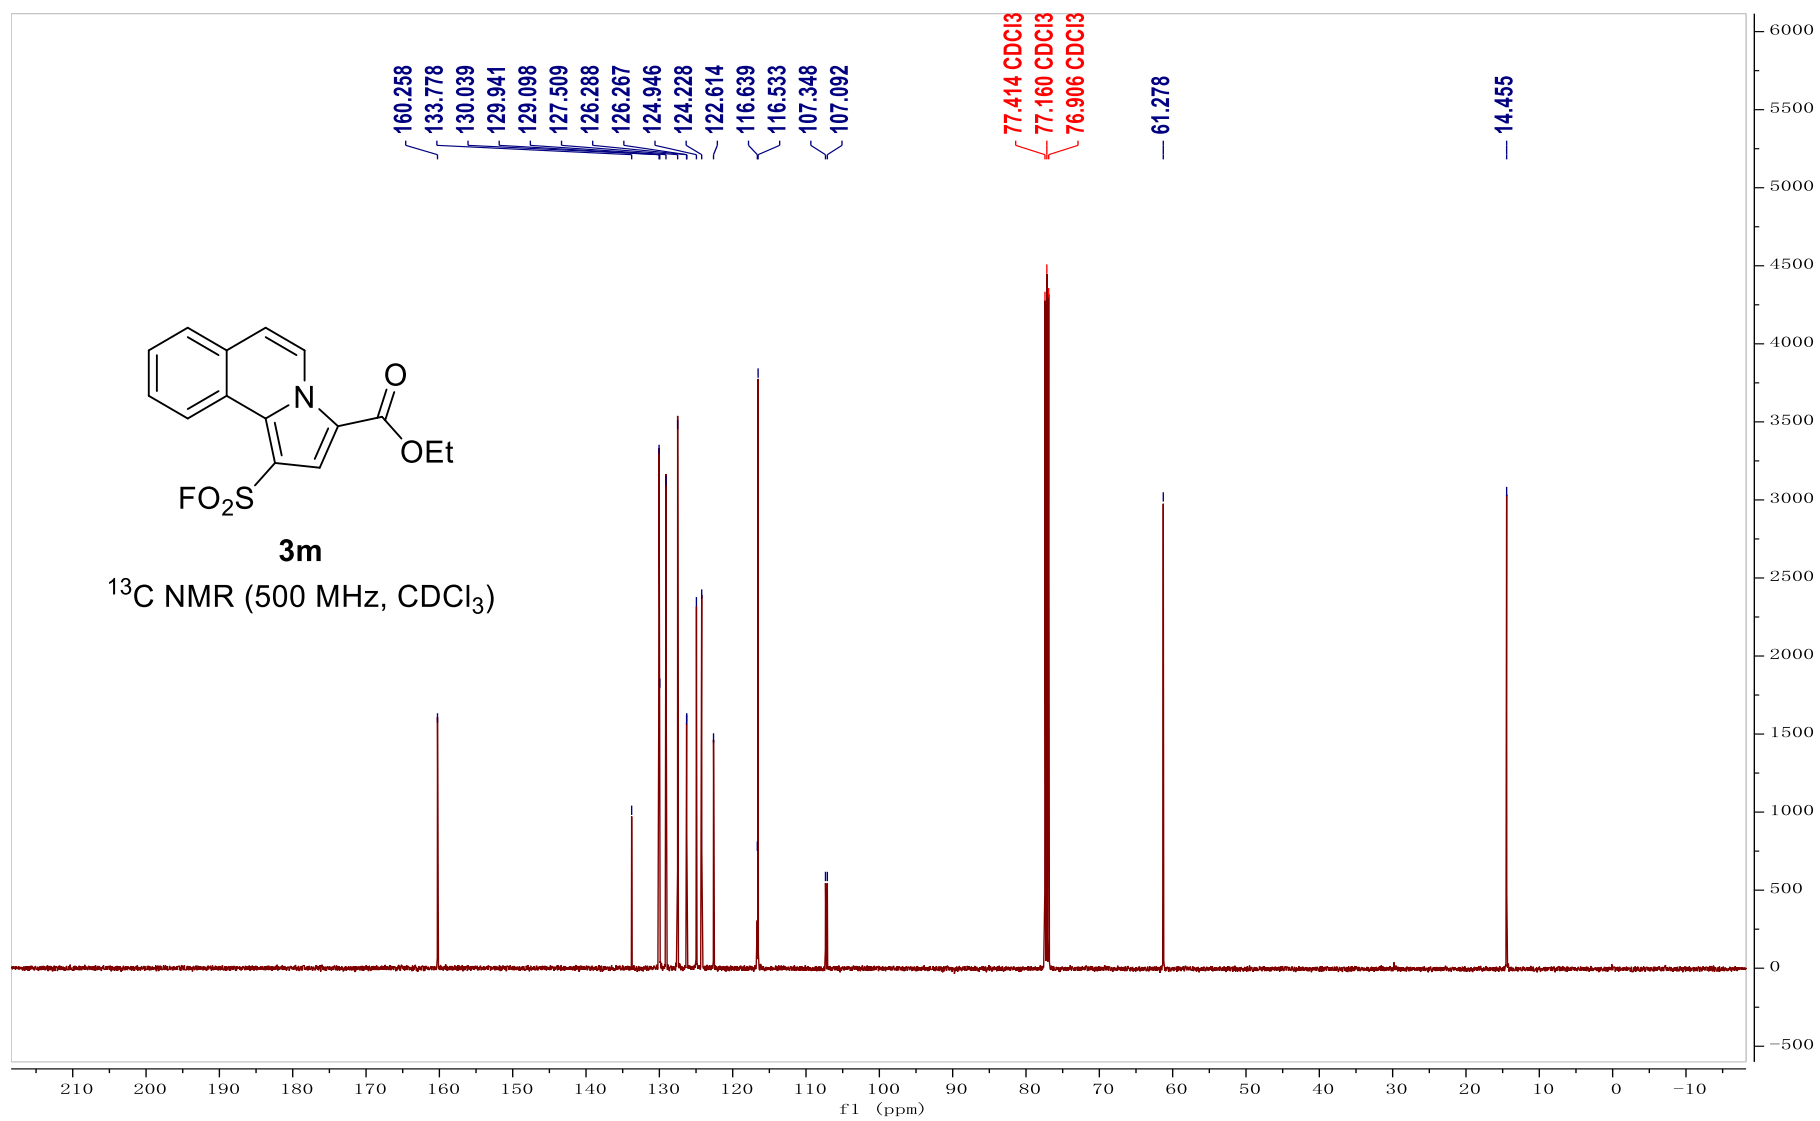

S116

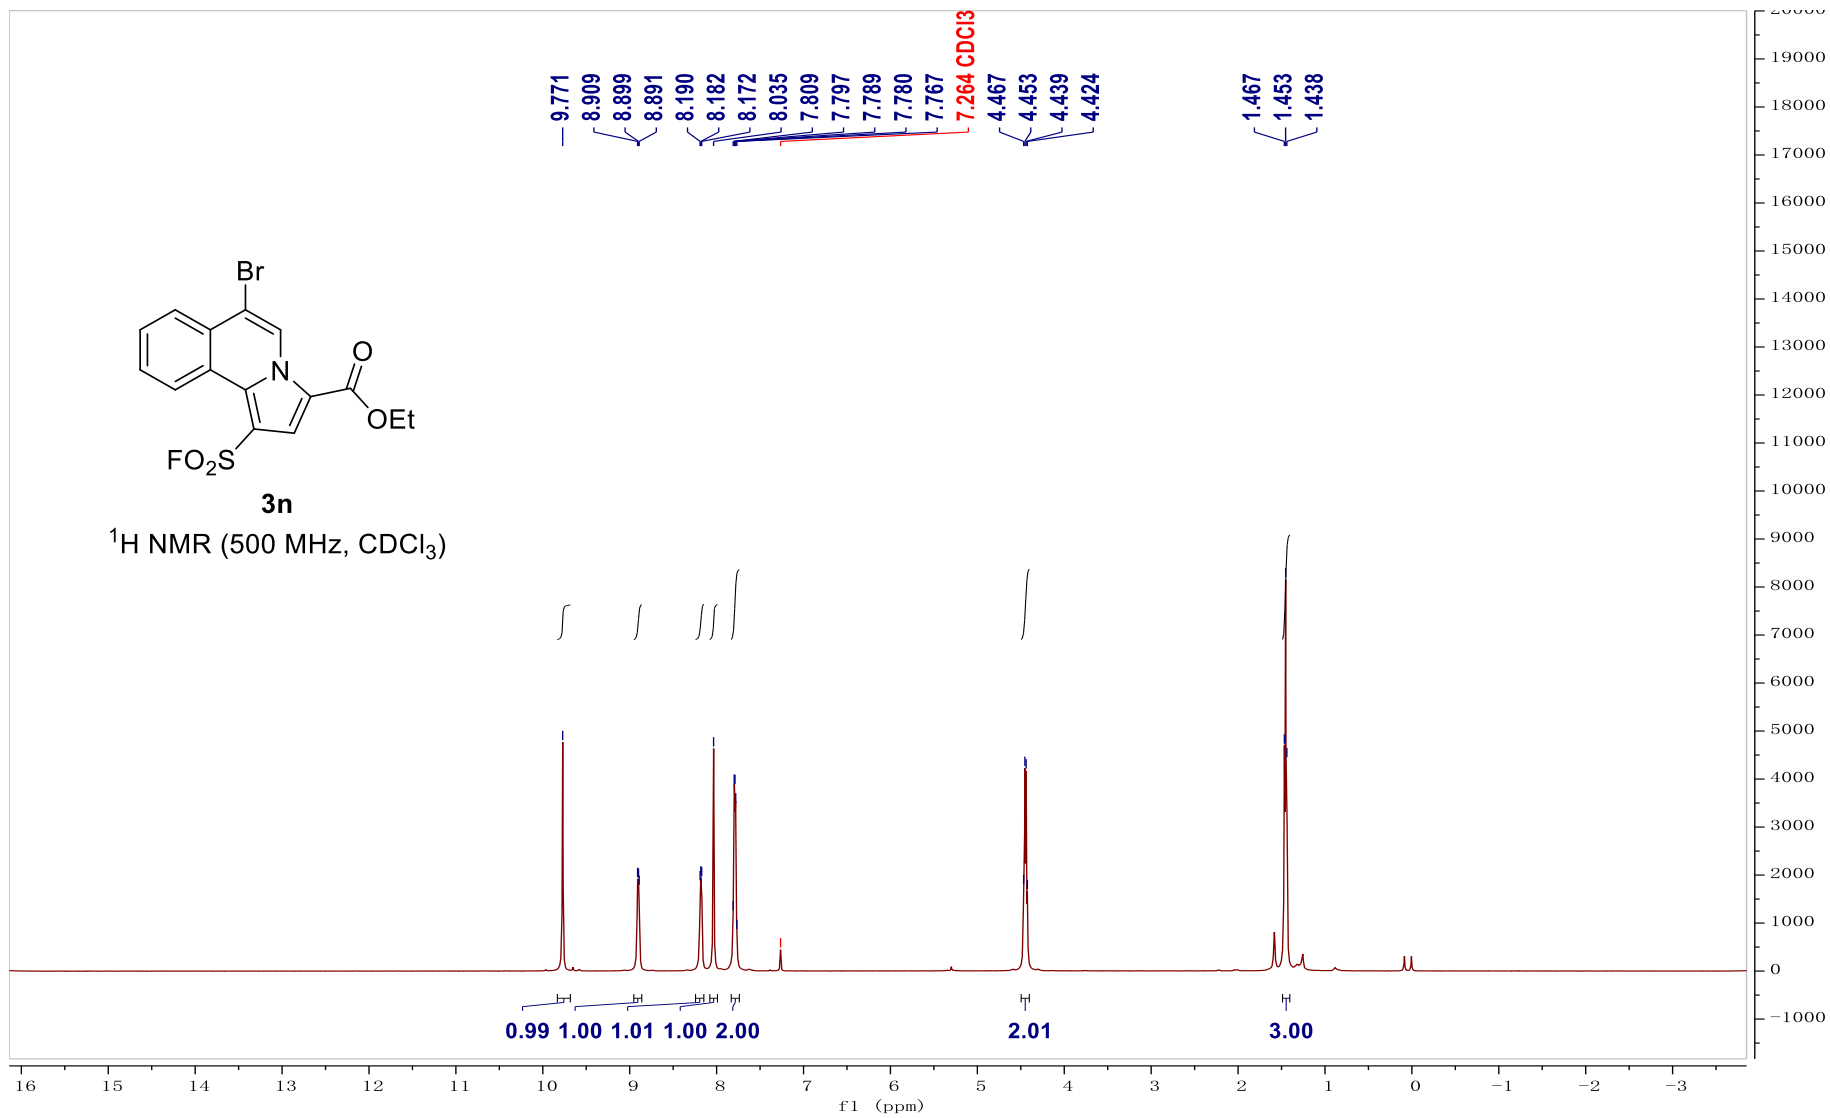

S117

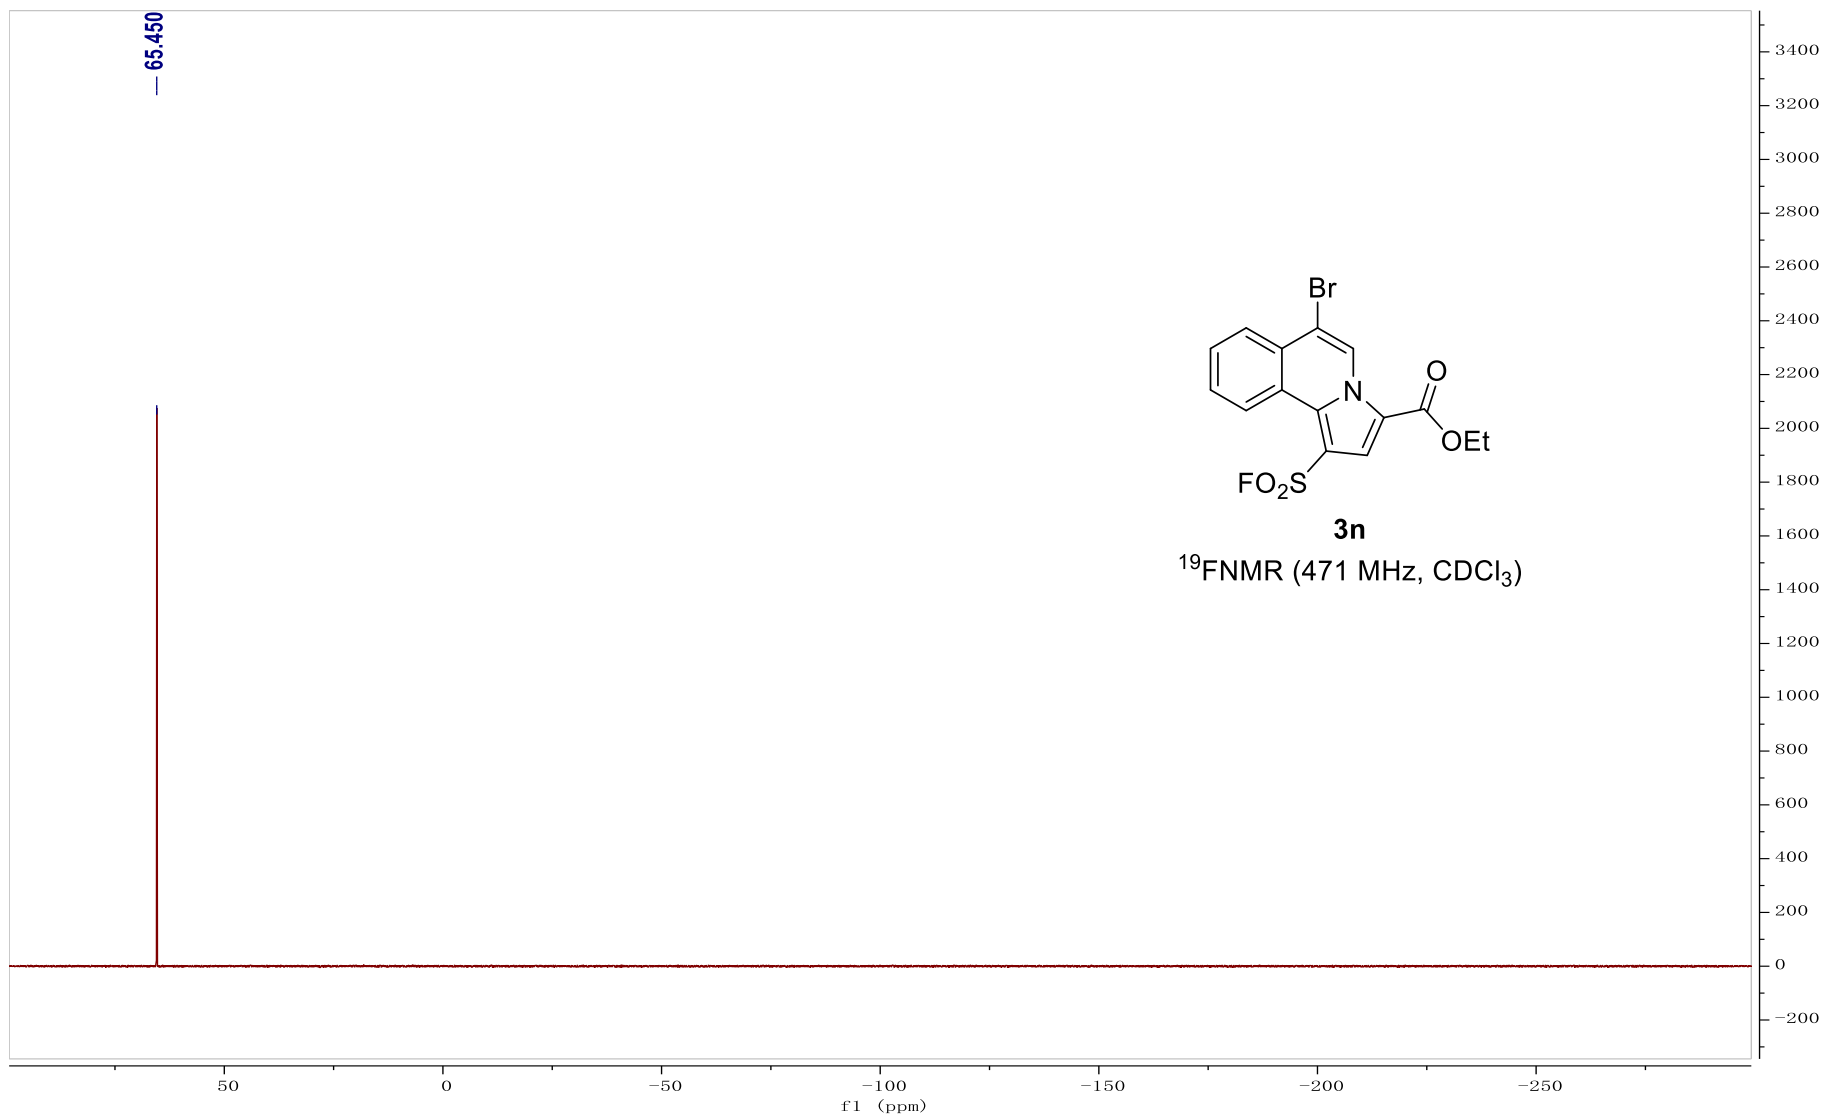

S118



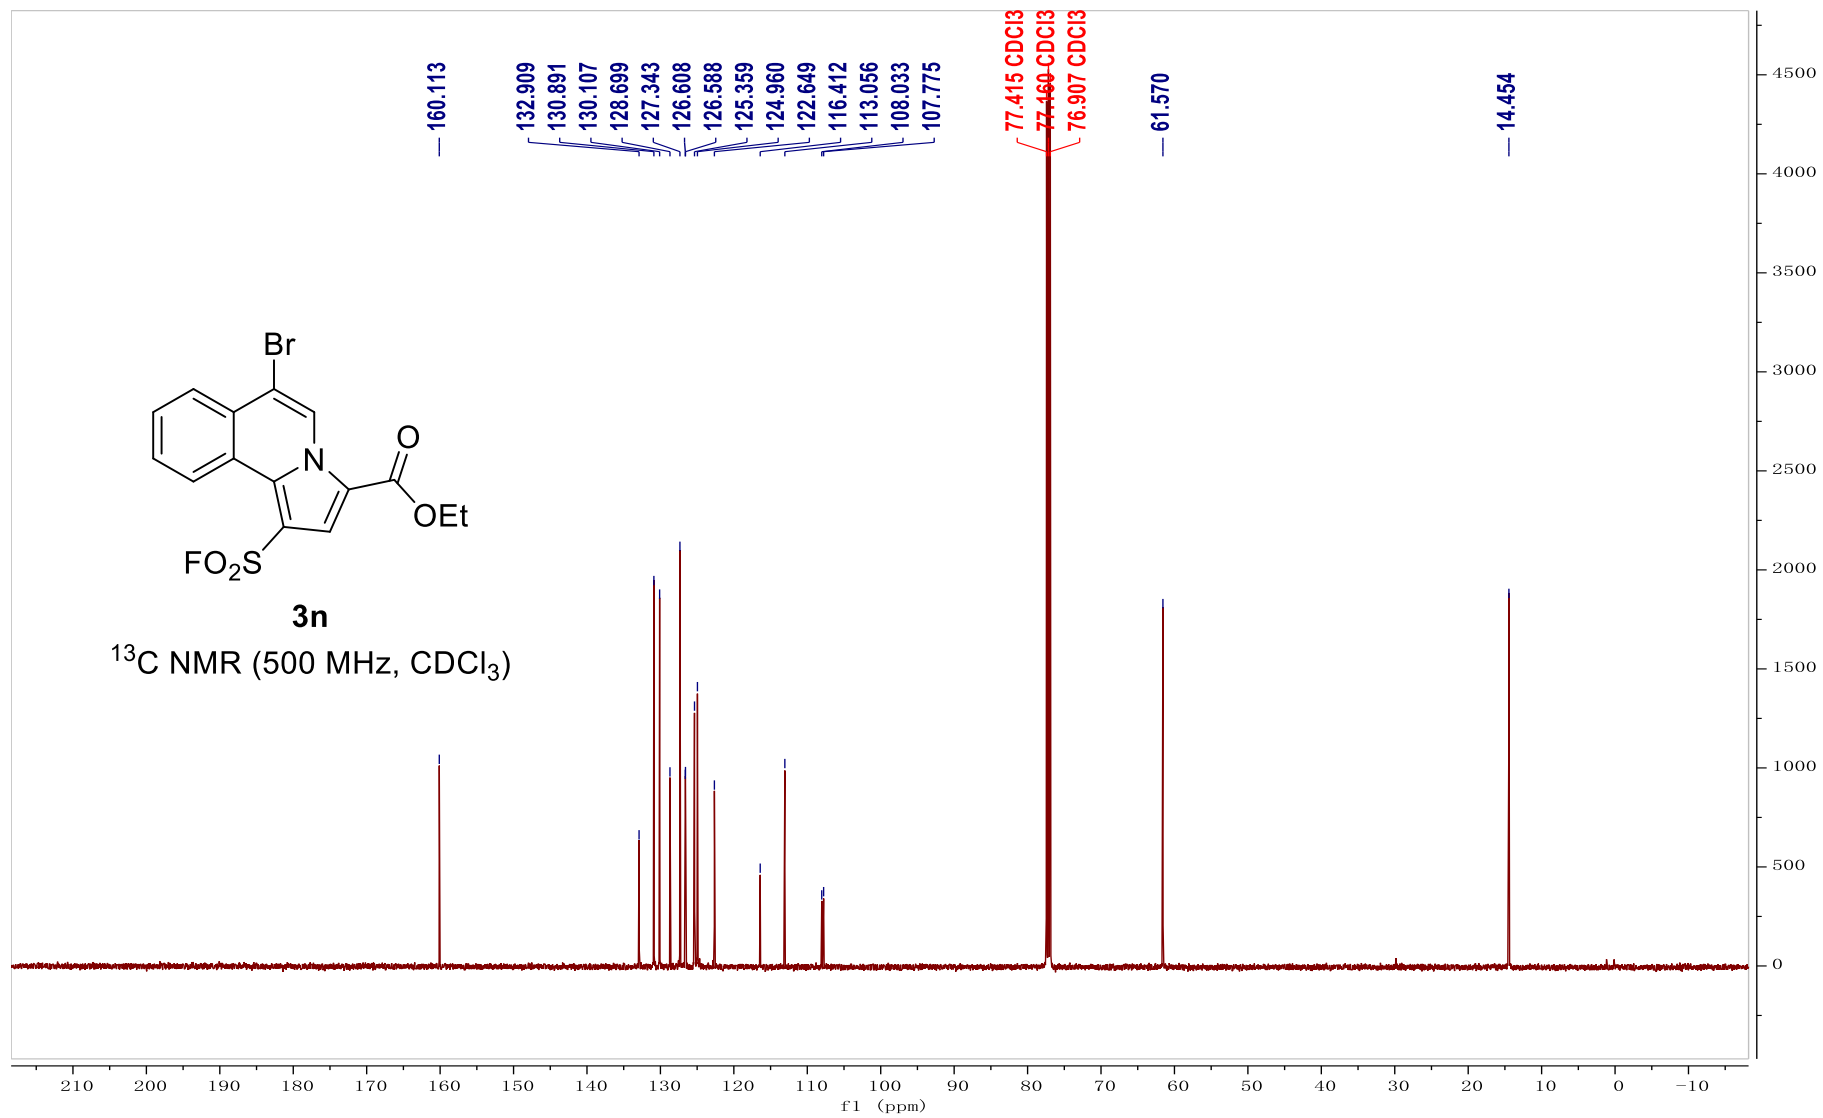

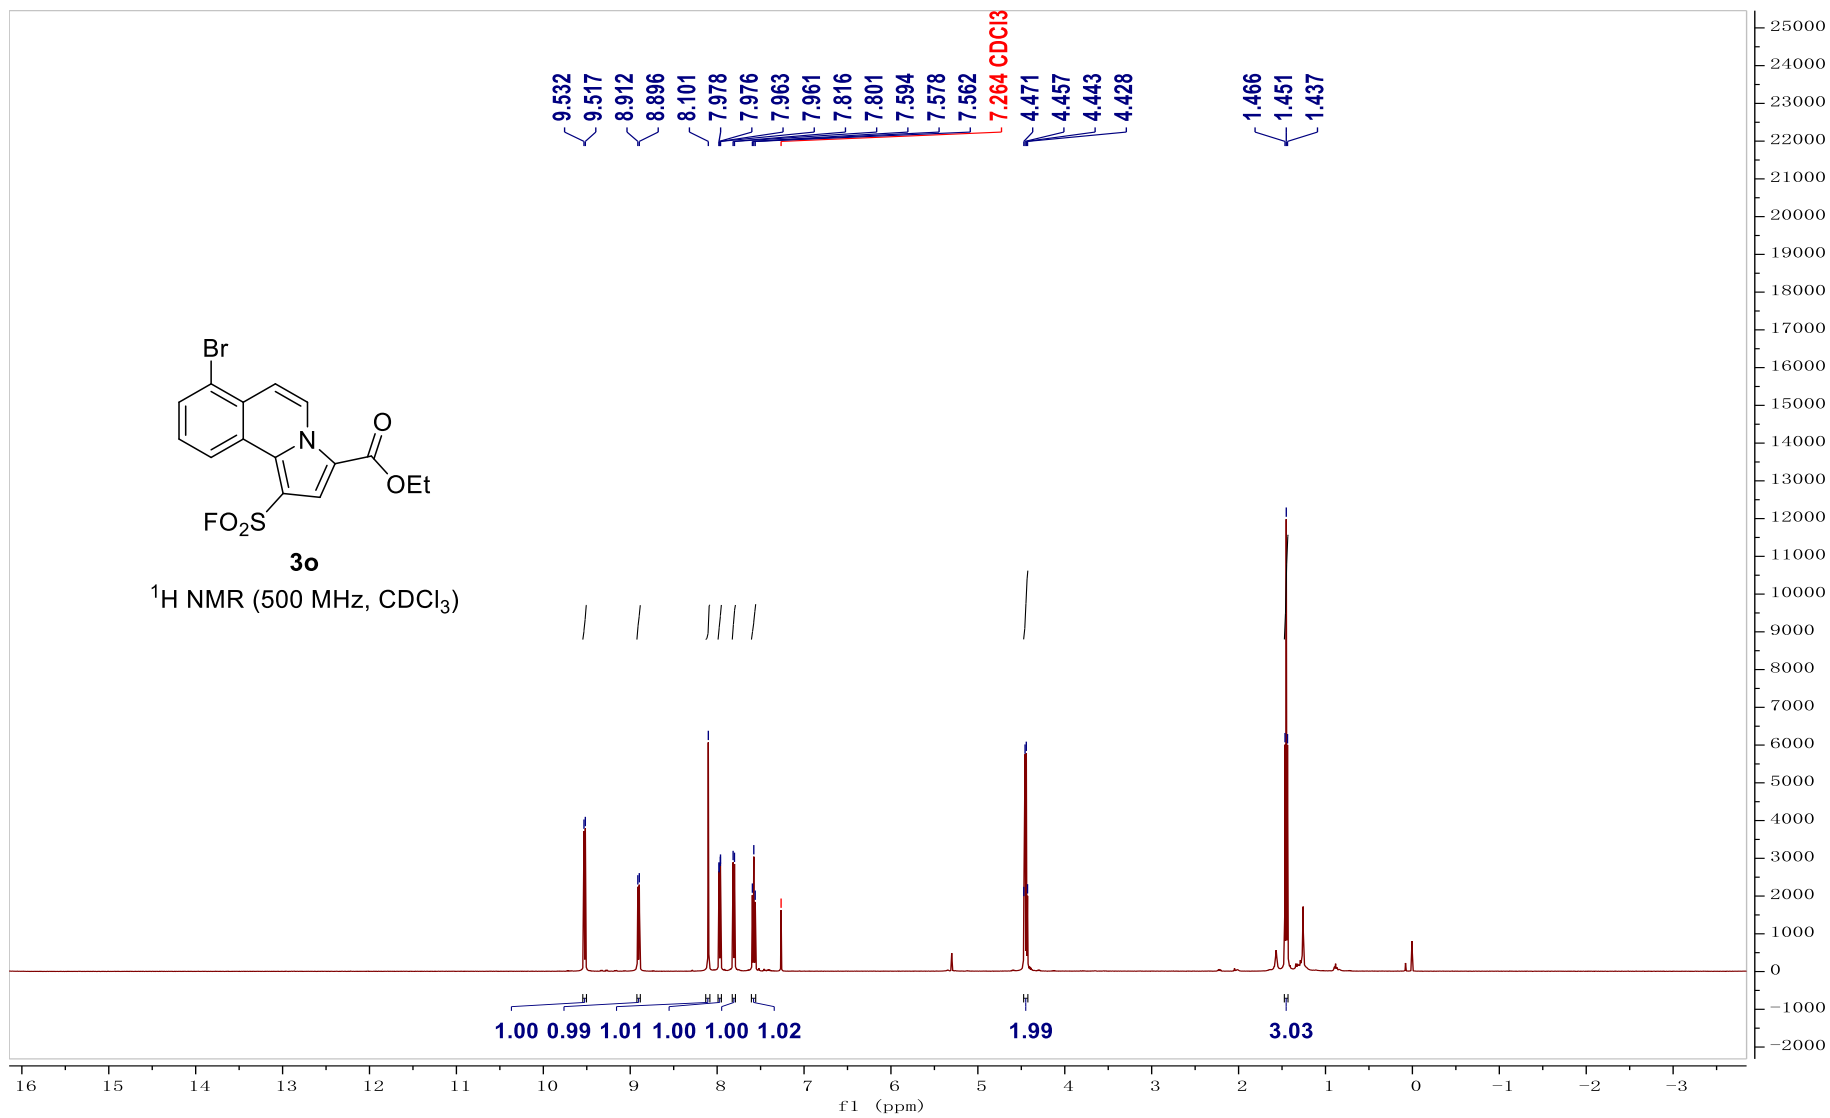

S120

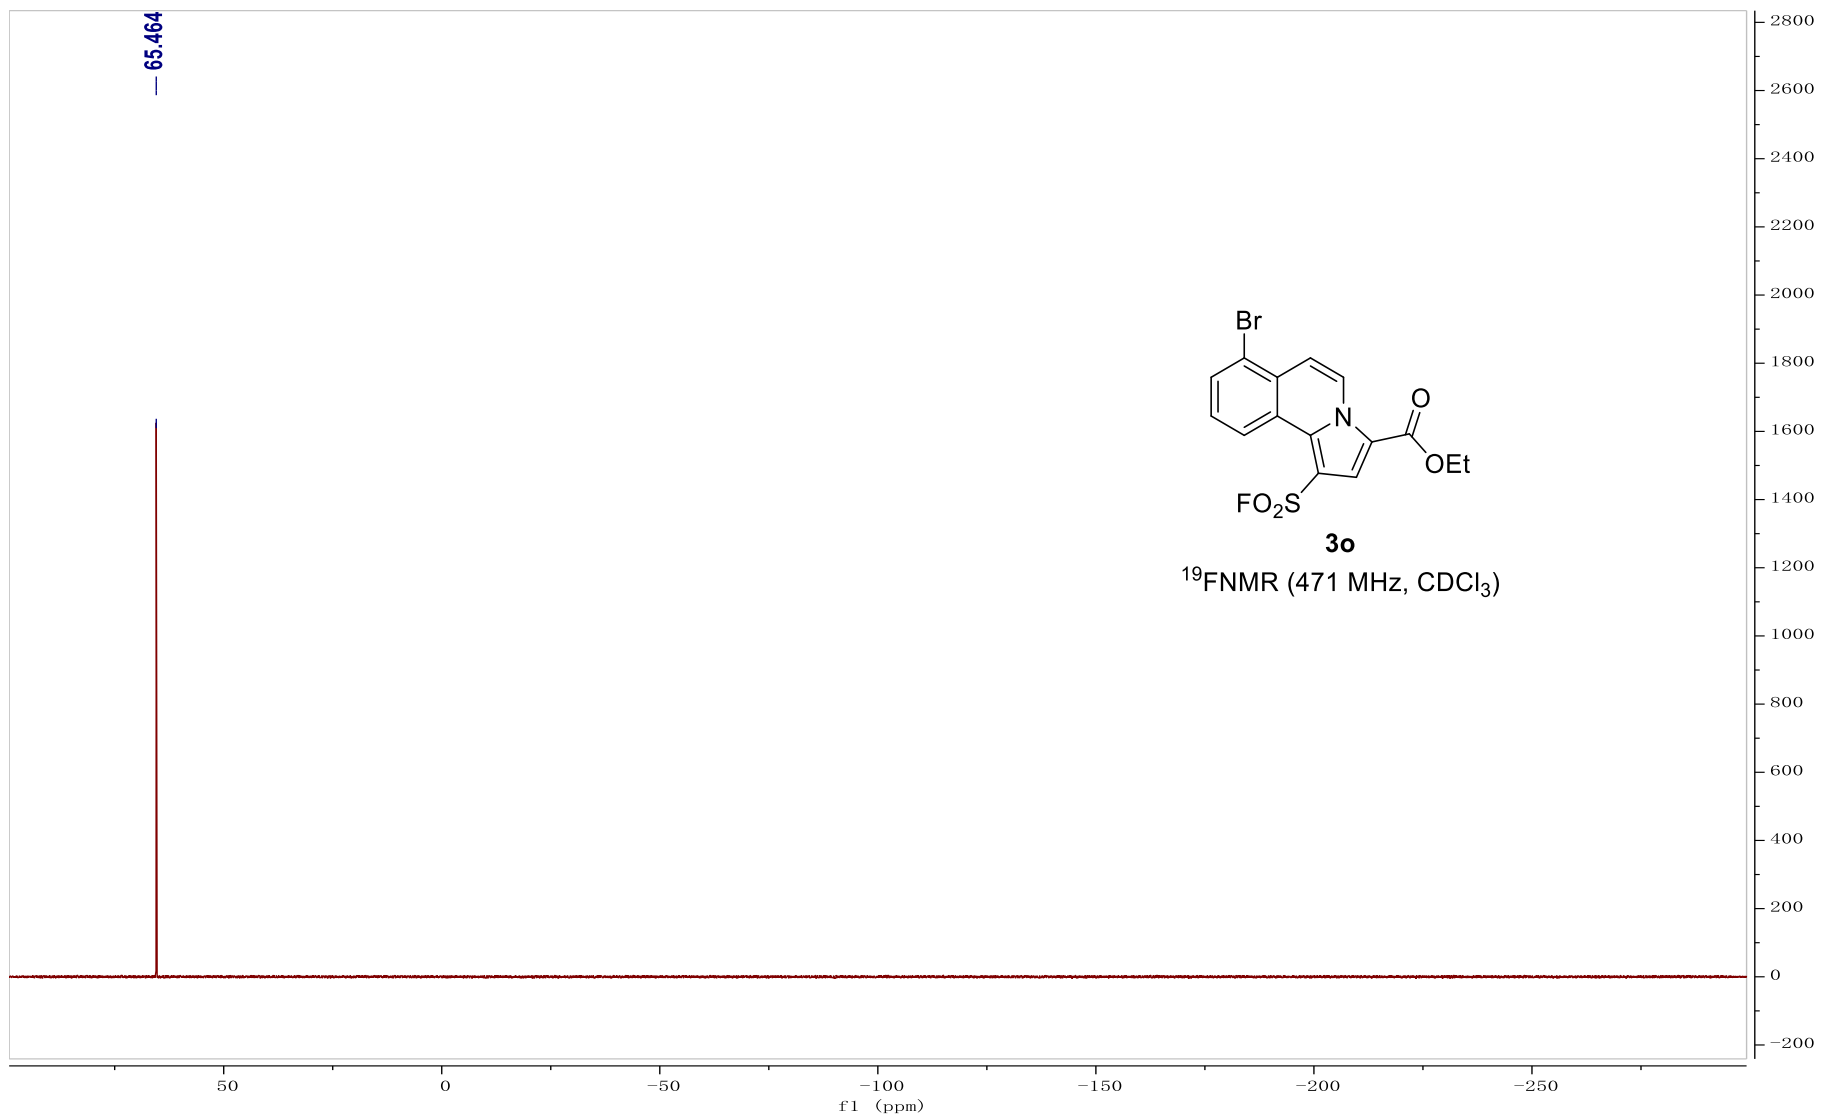

S121

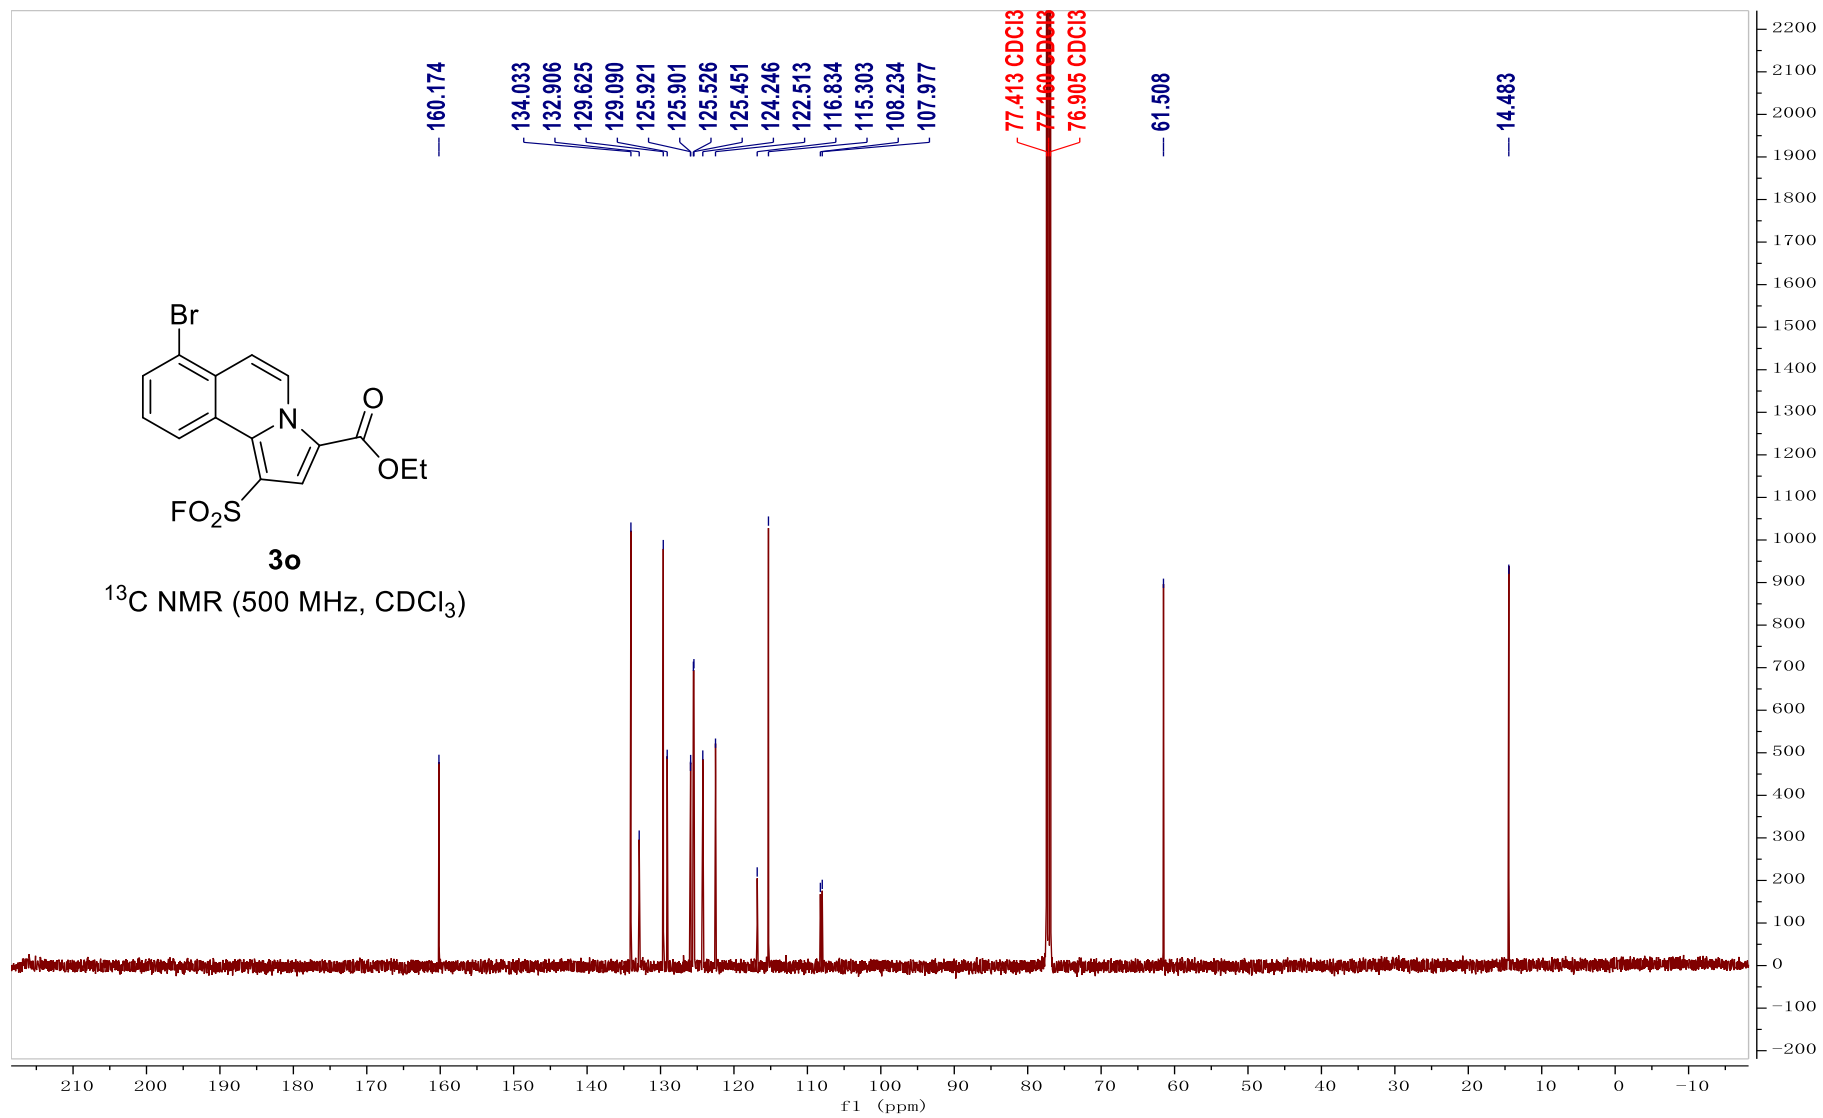

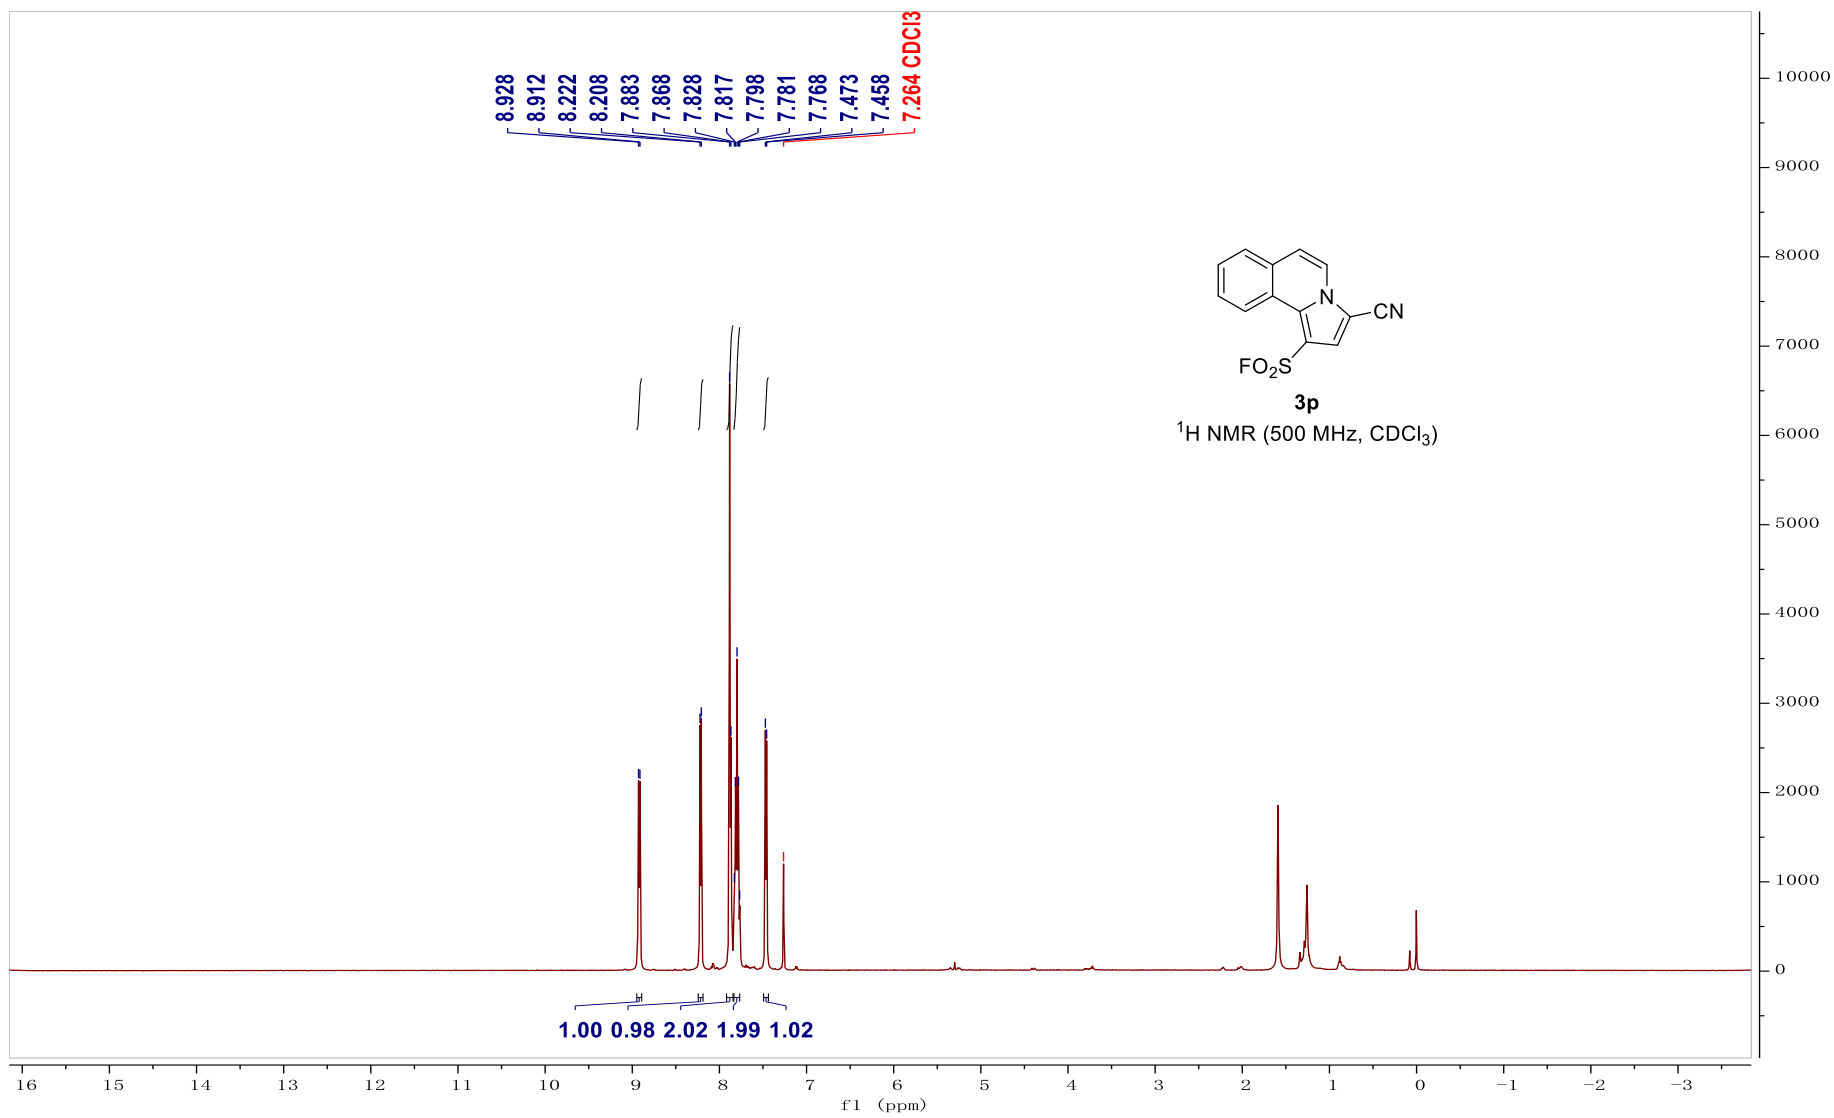

S123

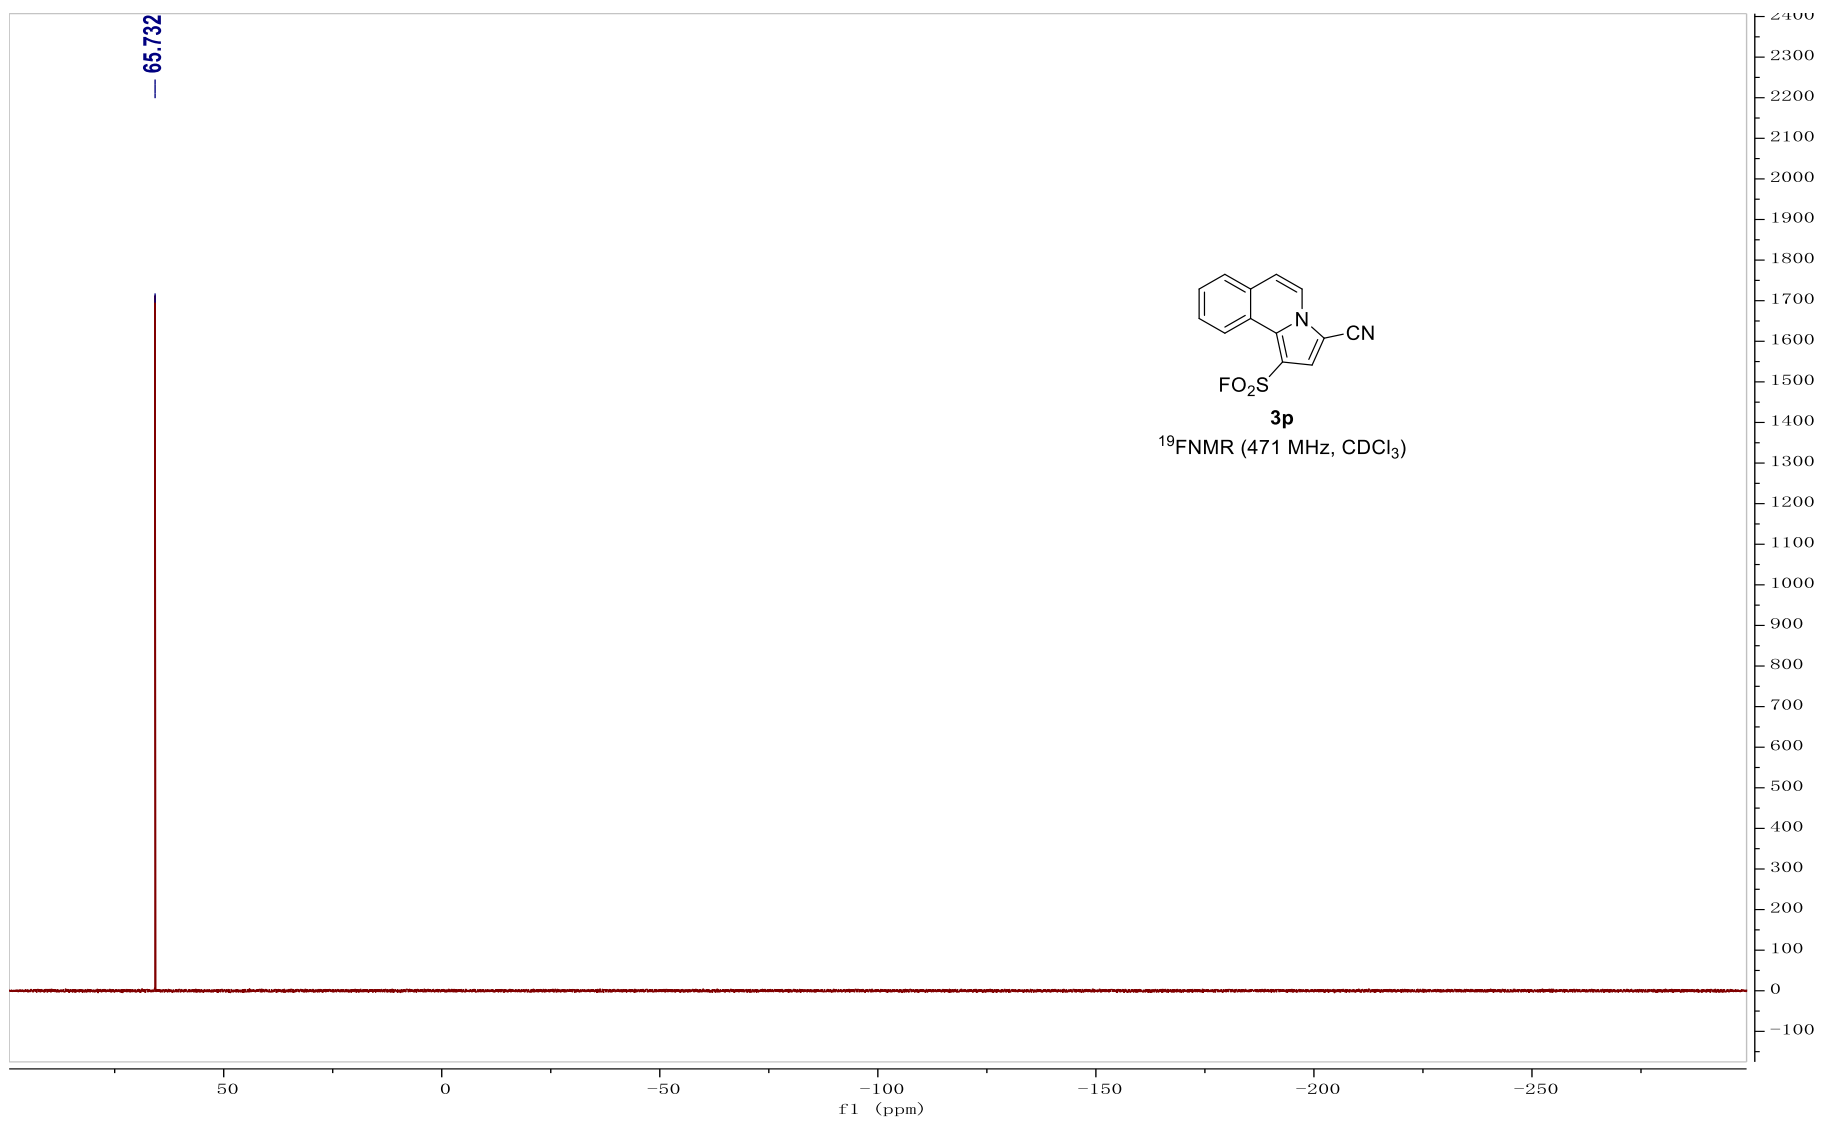

S124

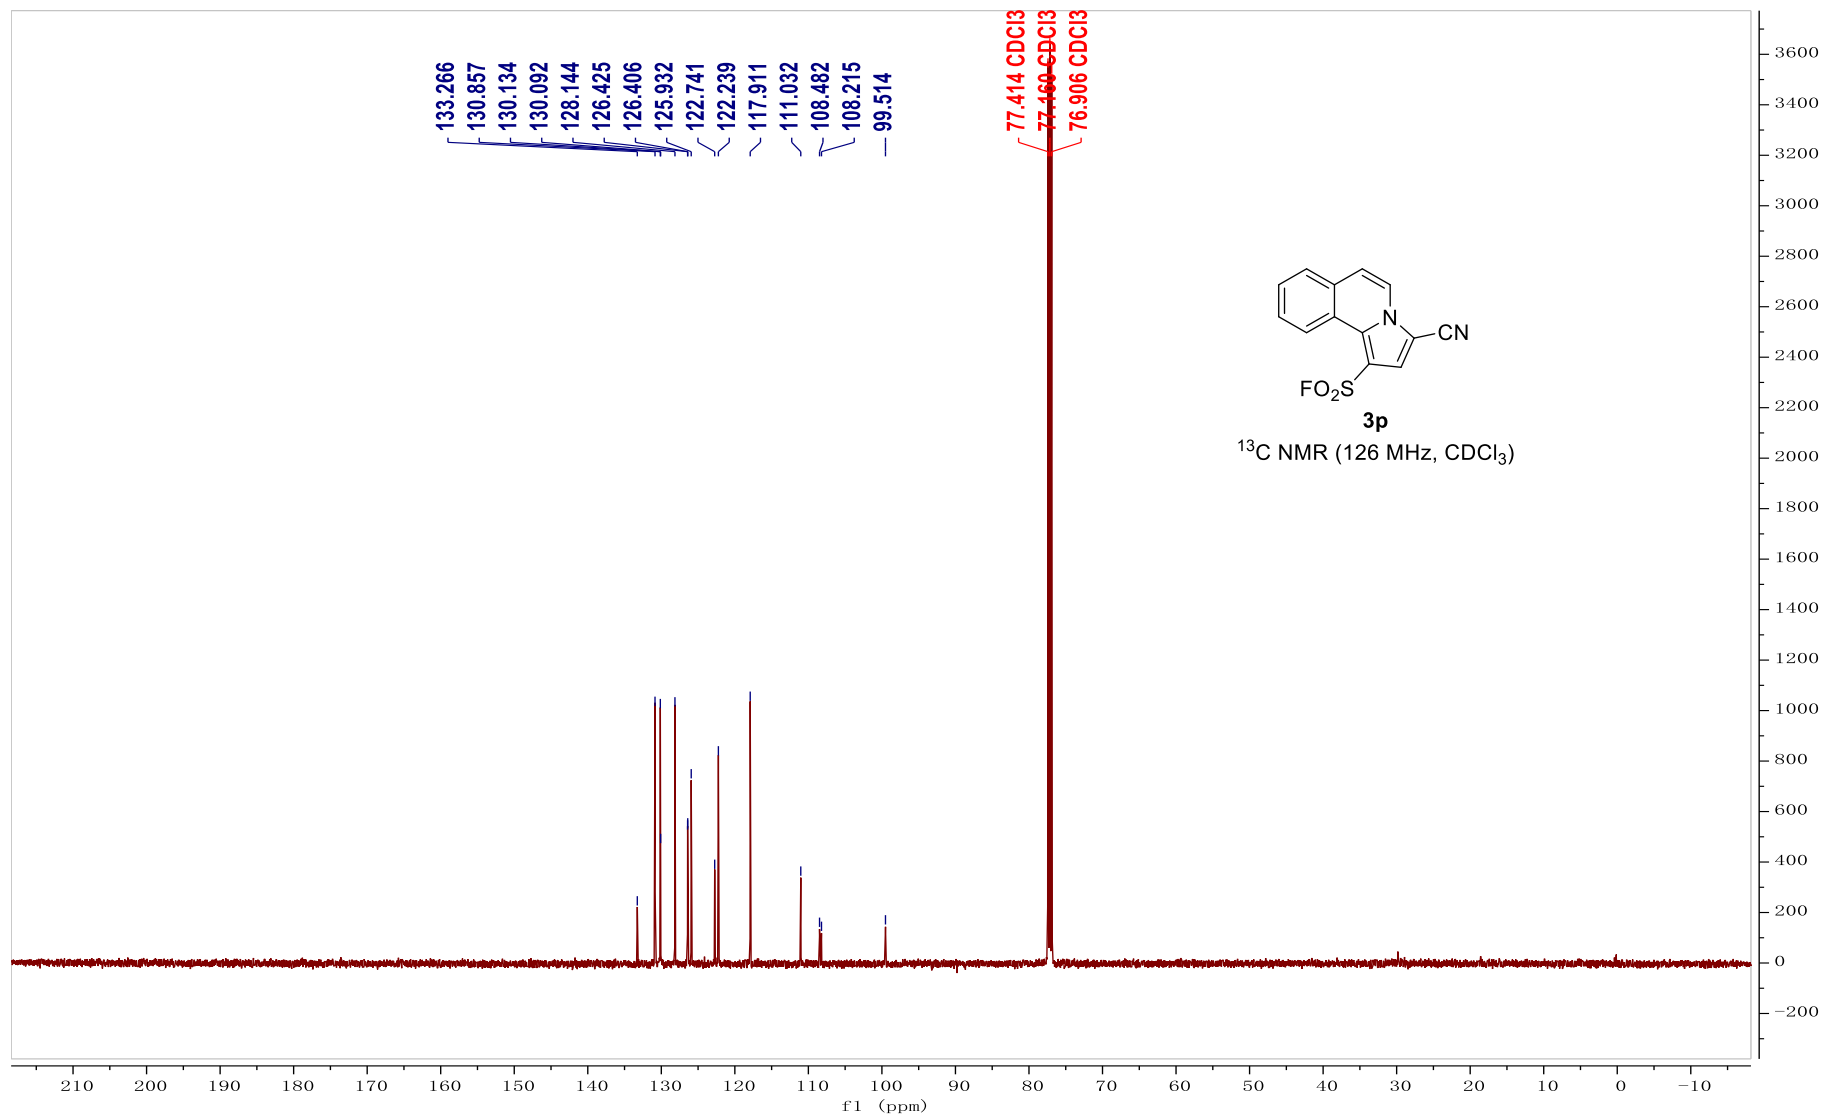

S125

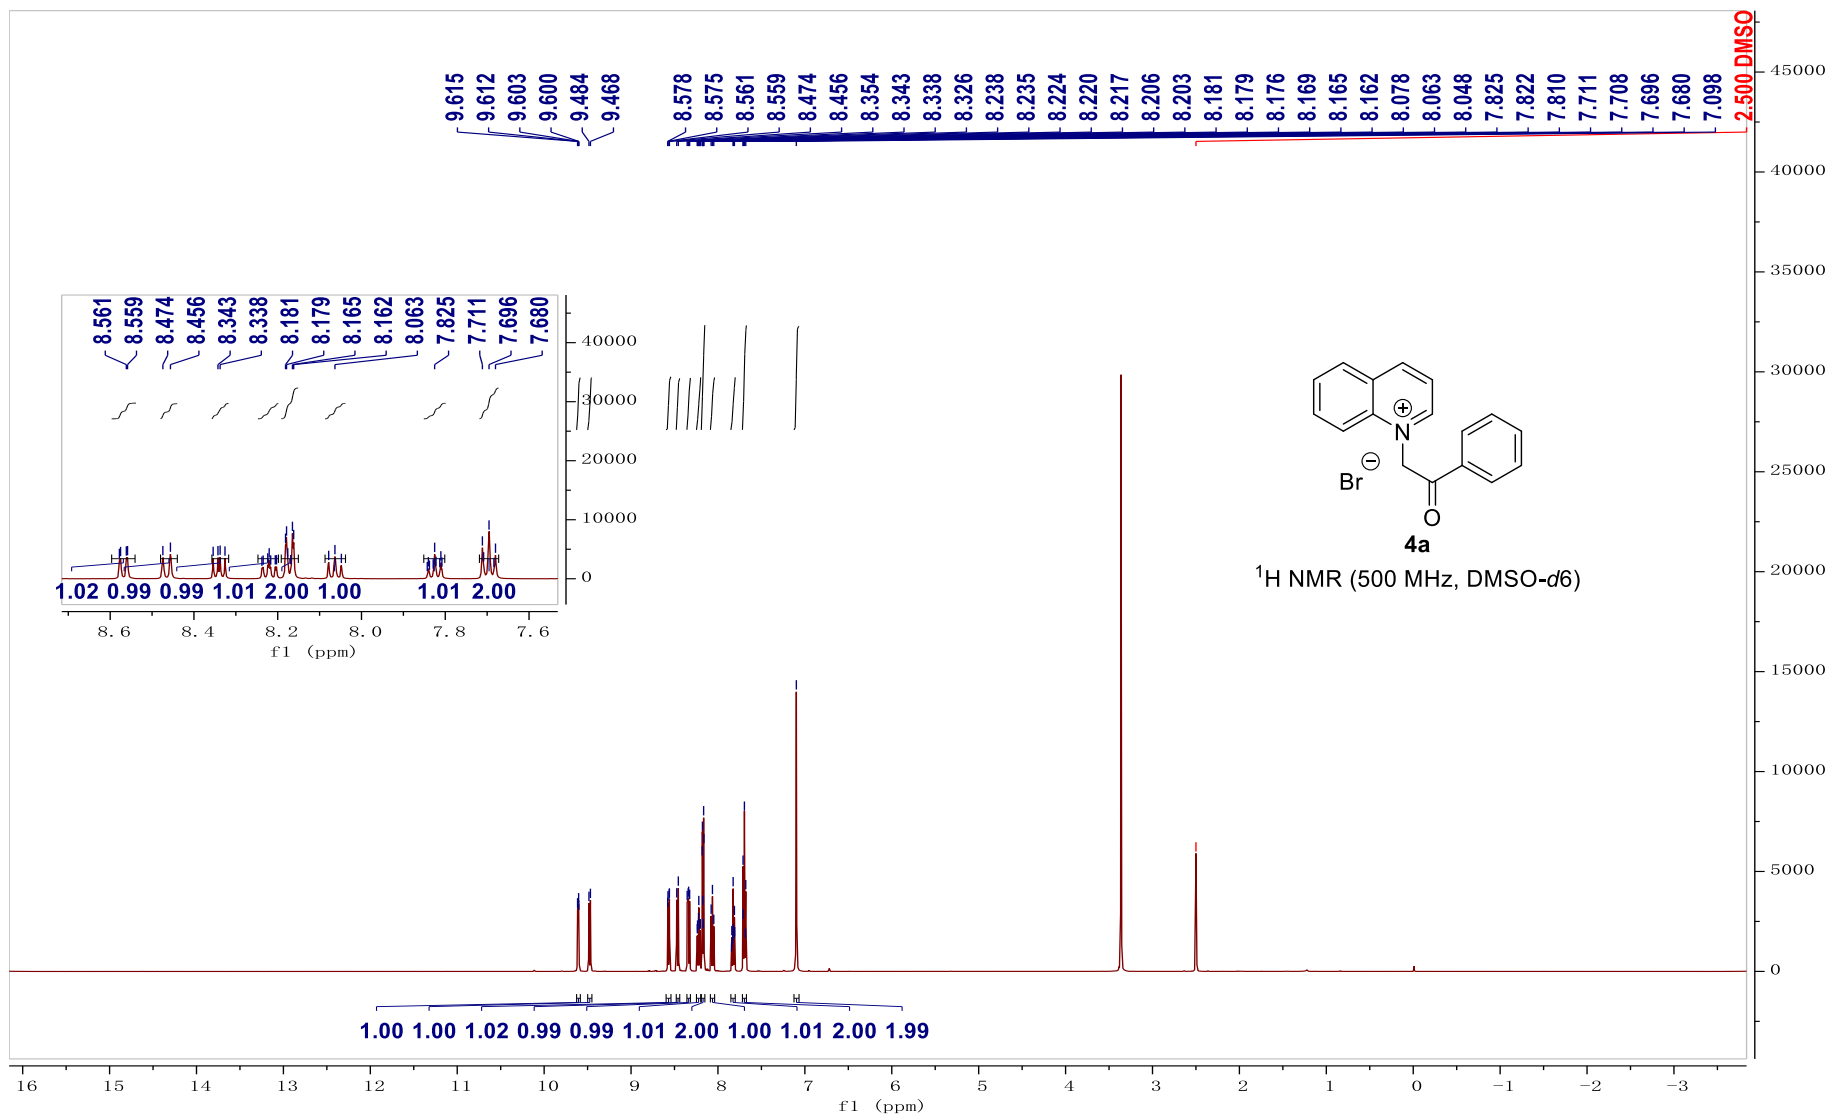



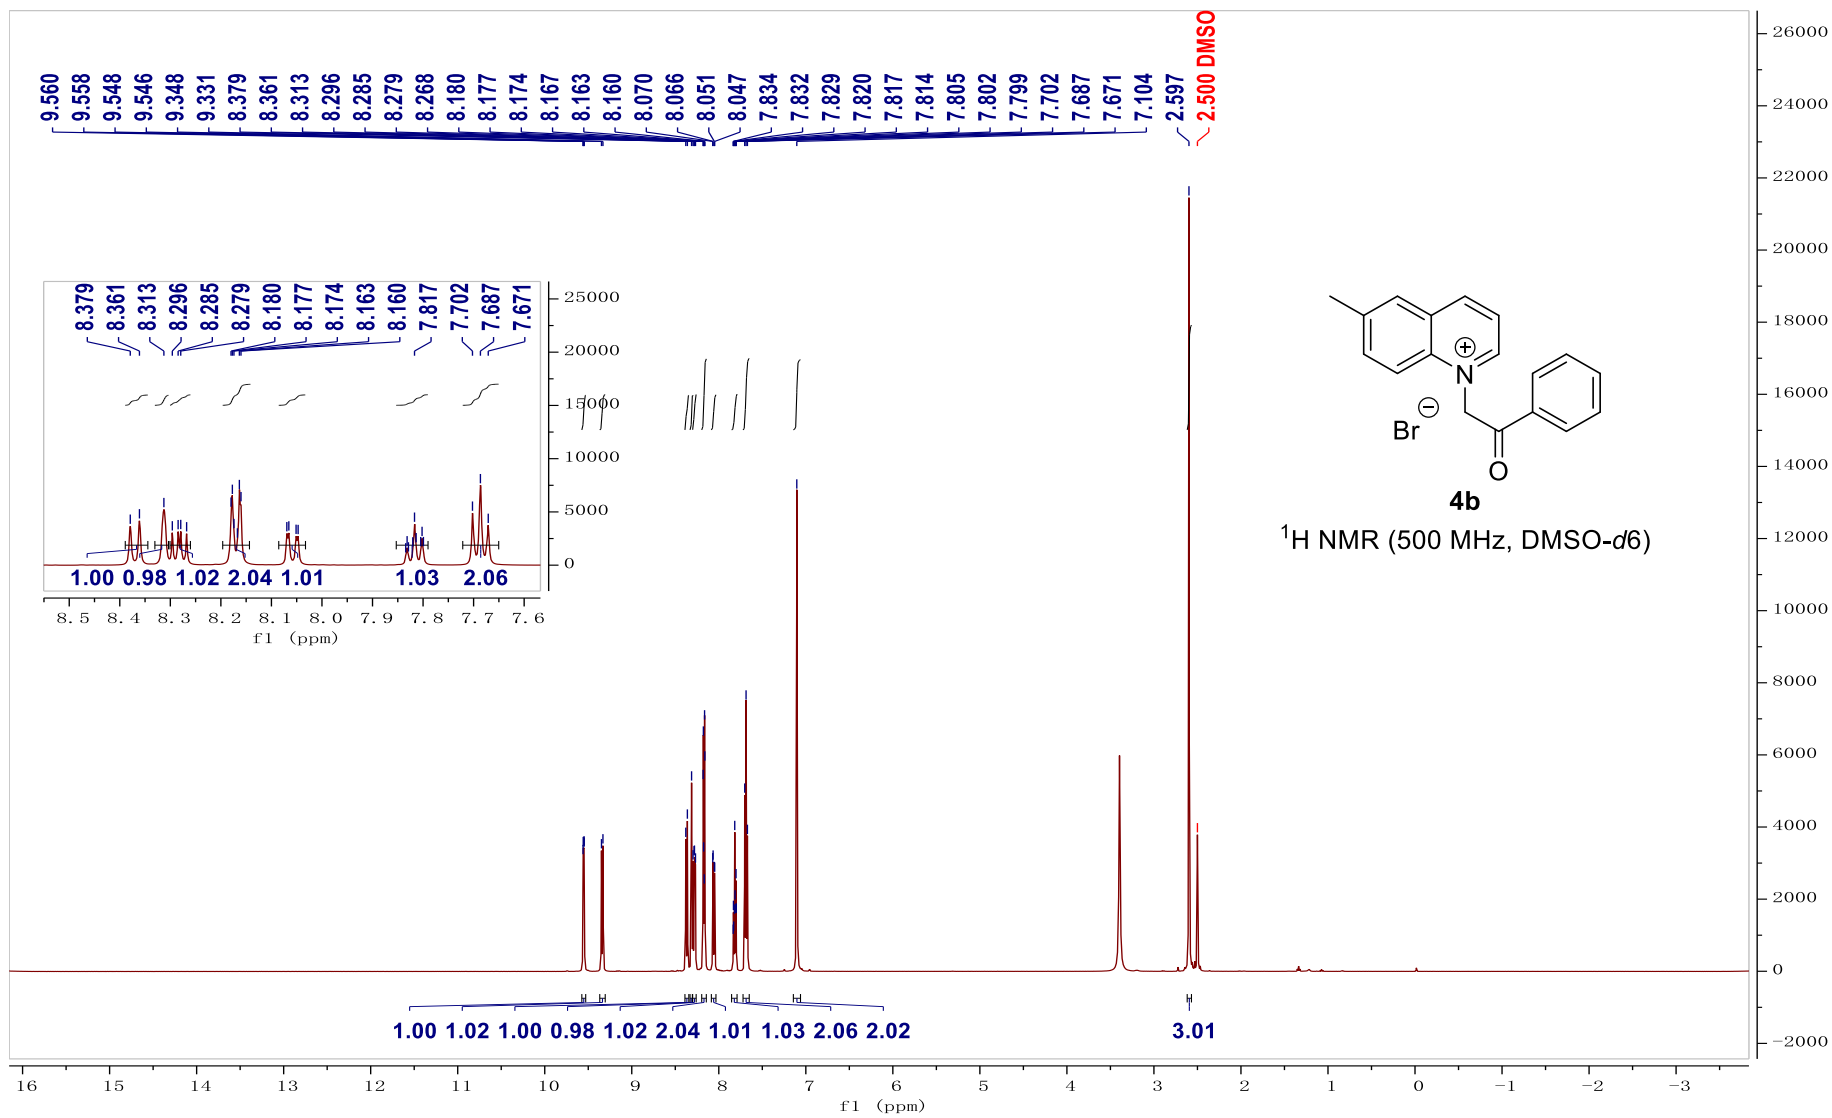

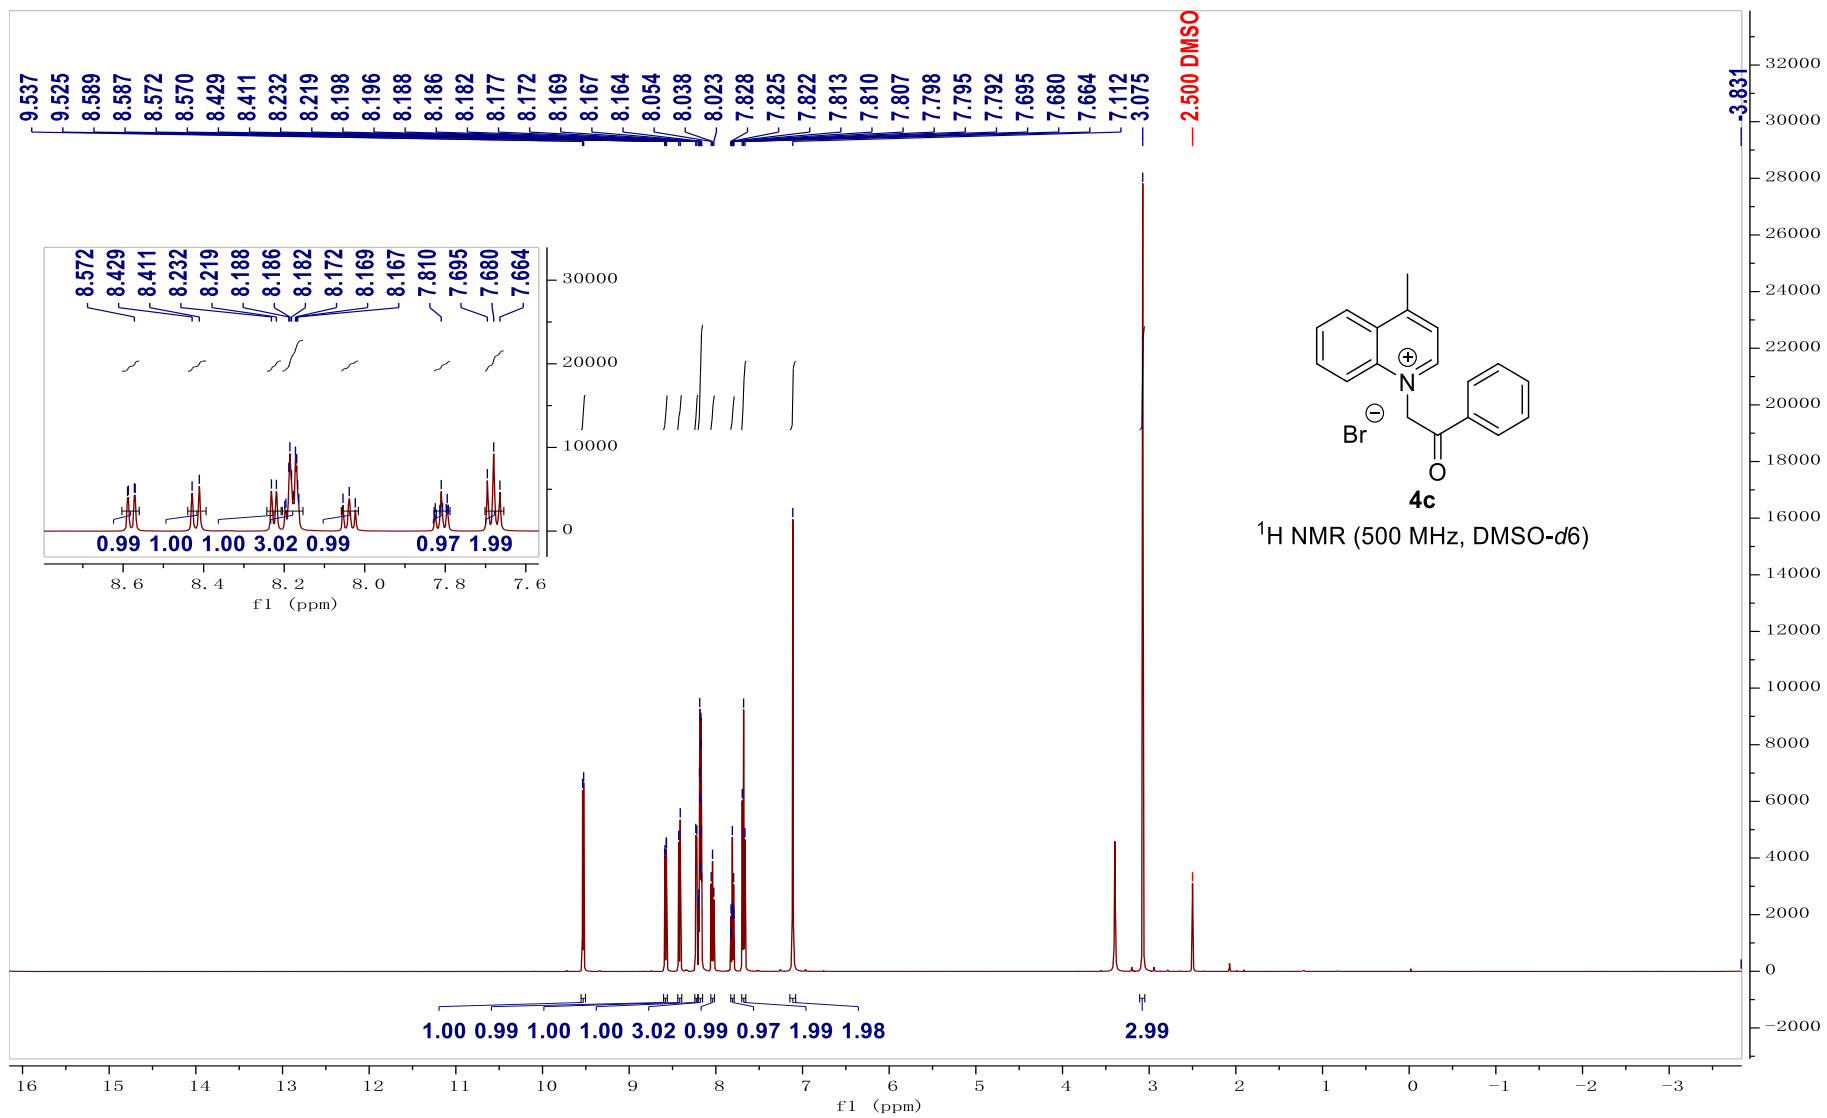

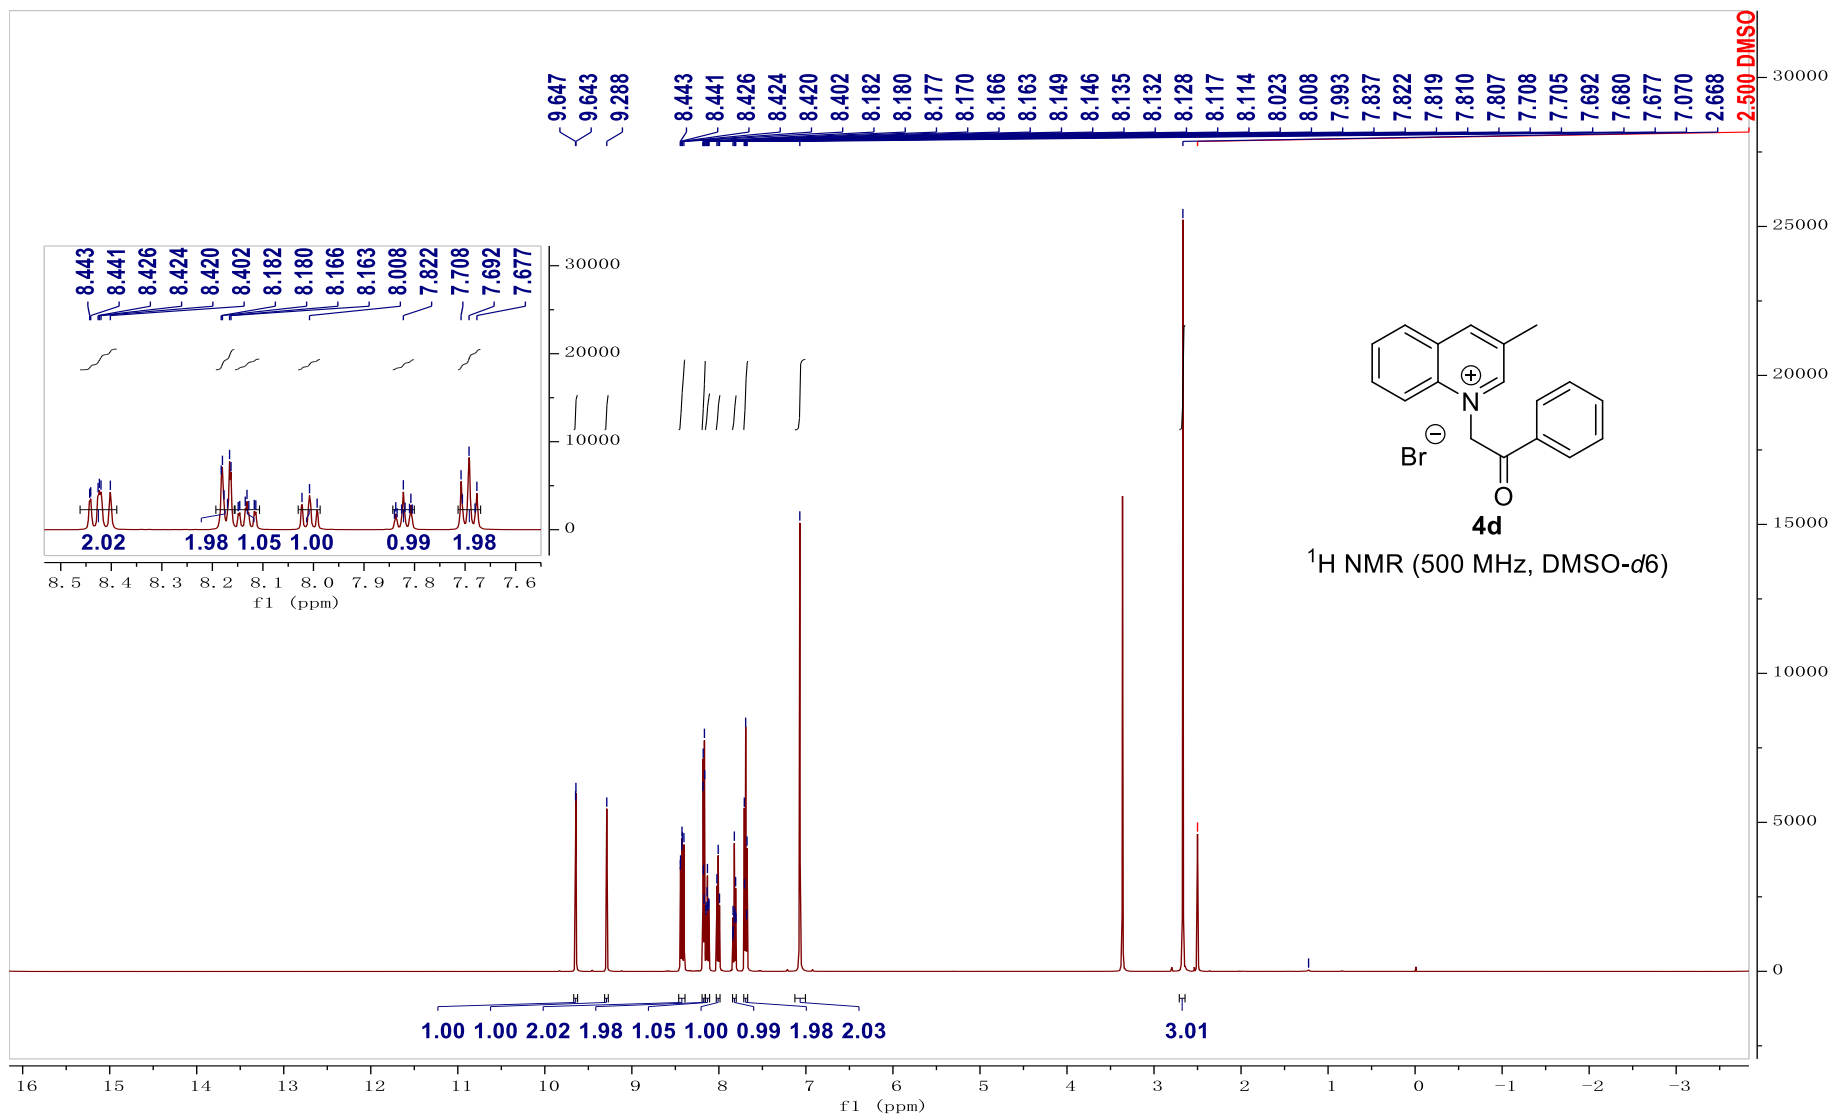

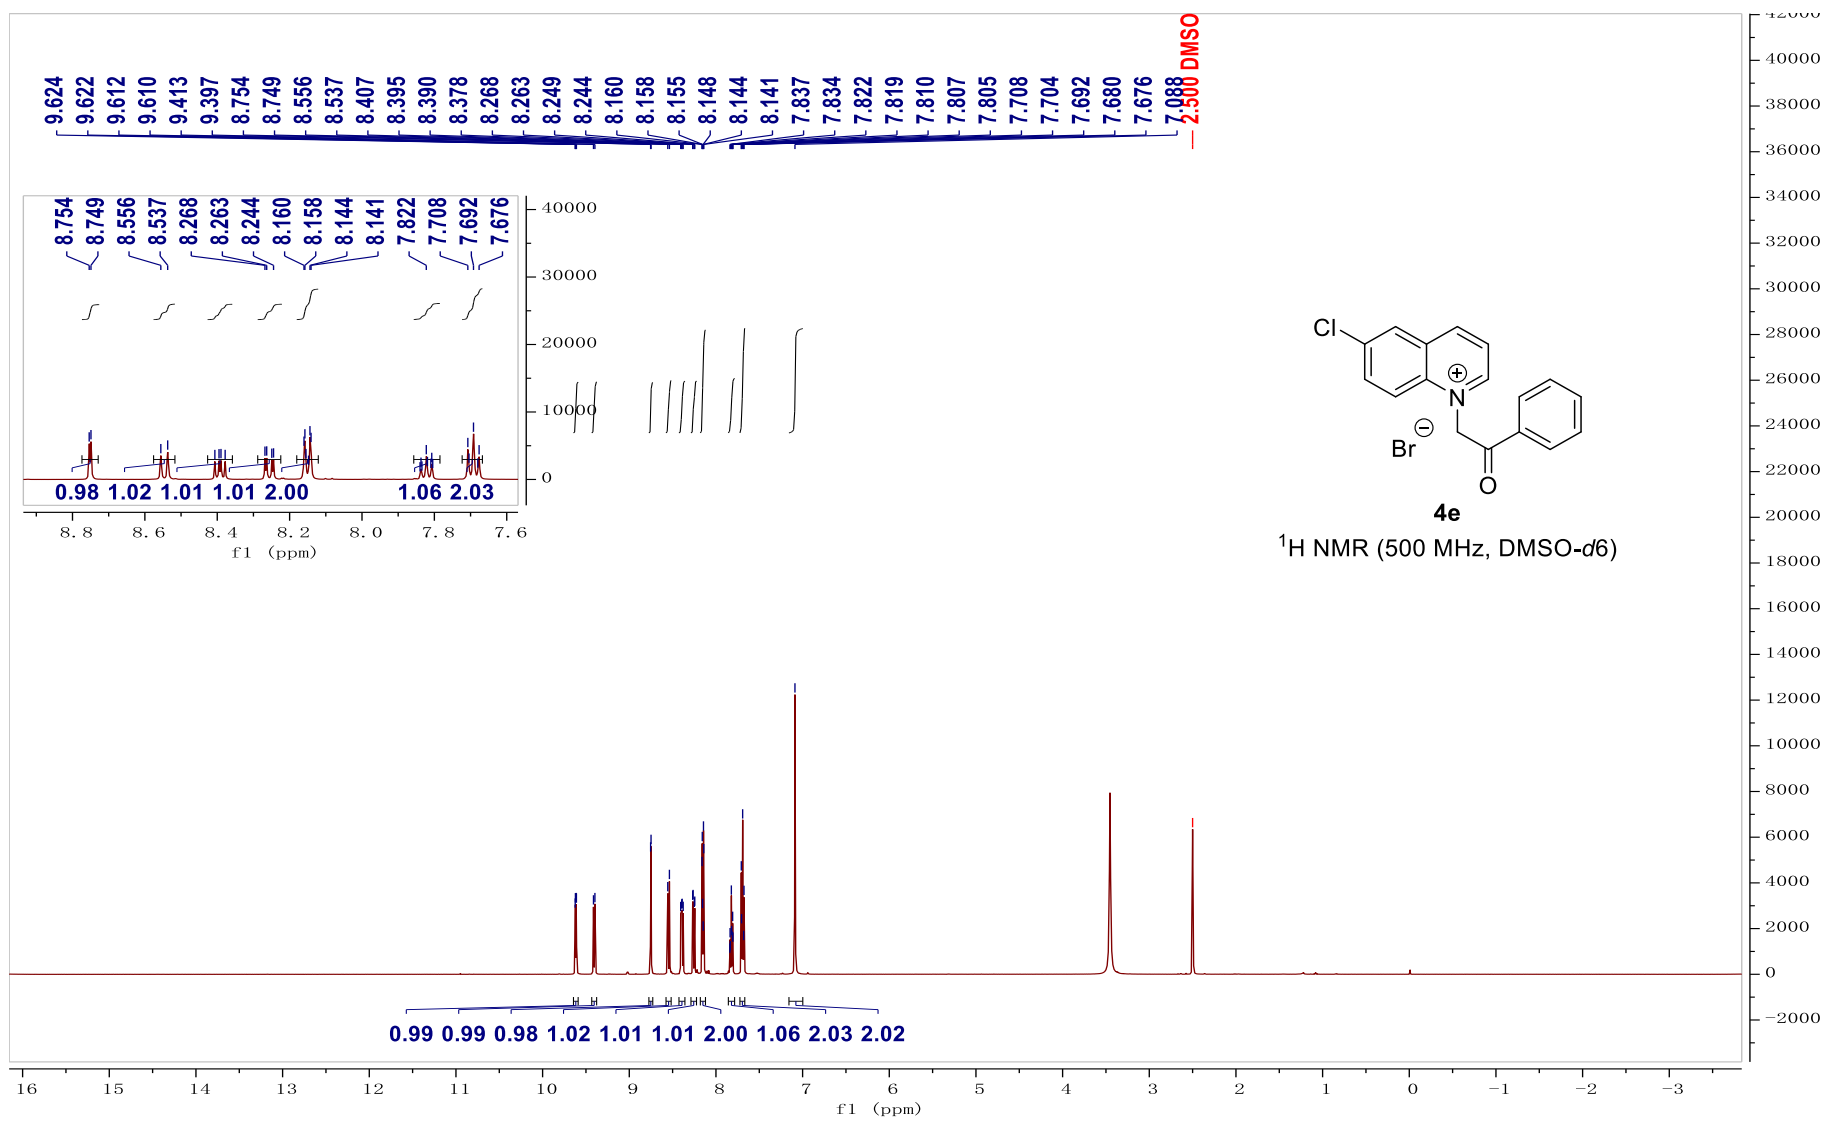

S130

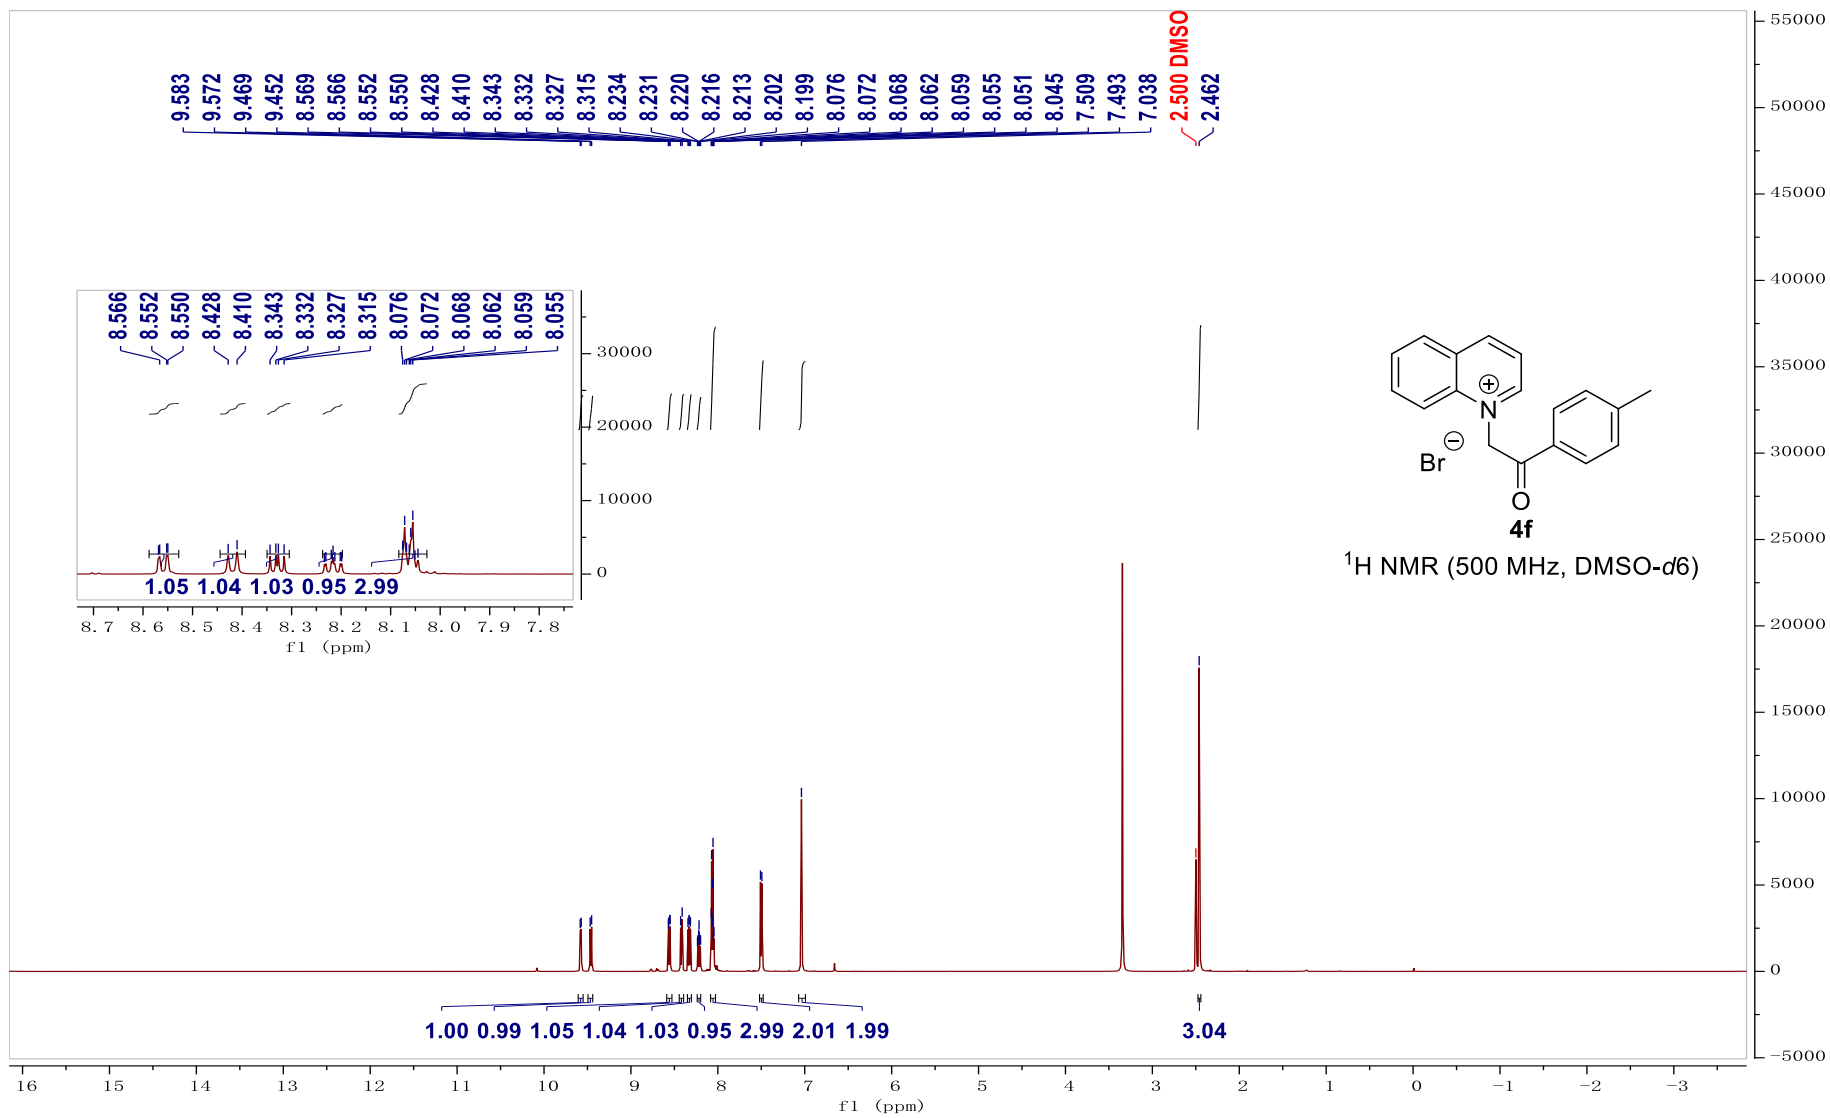

S131

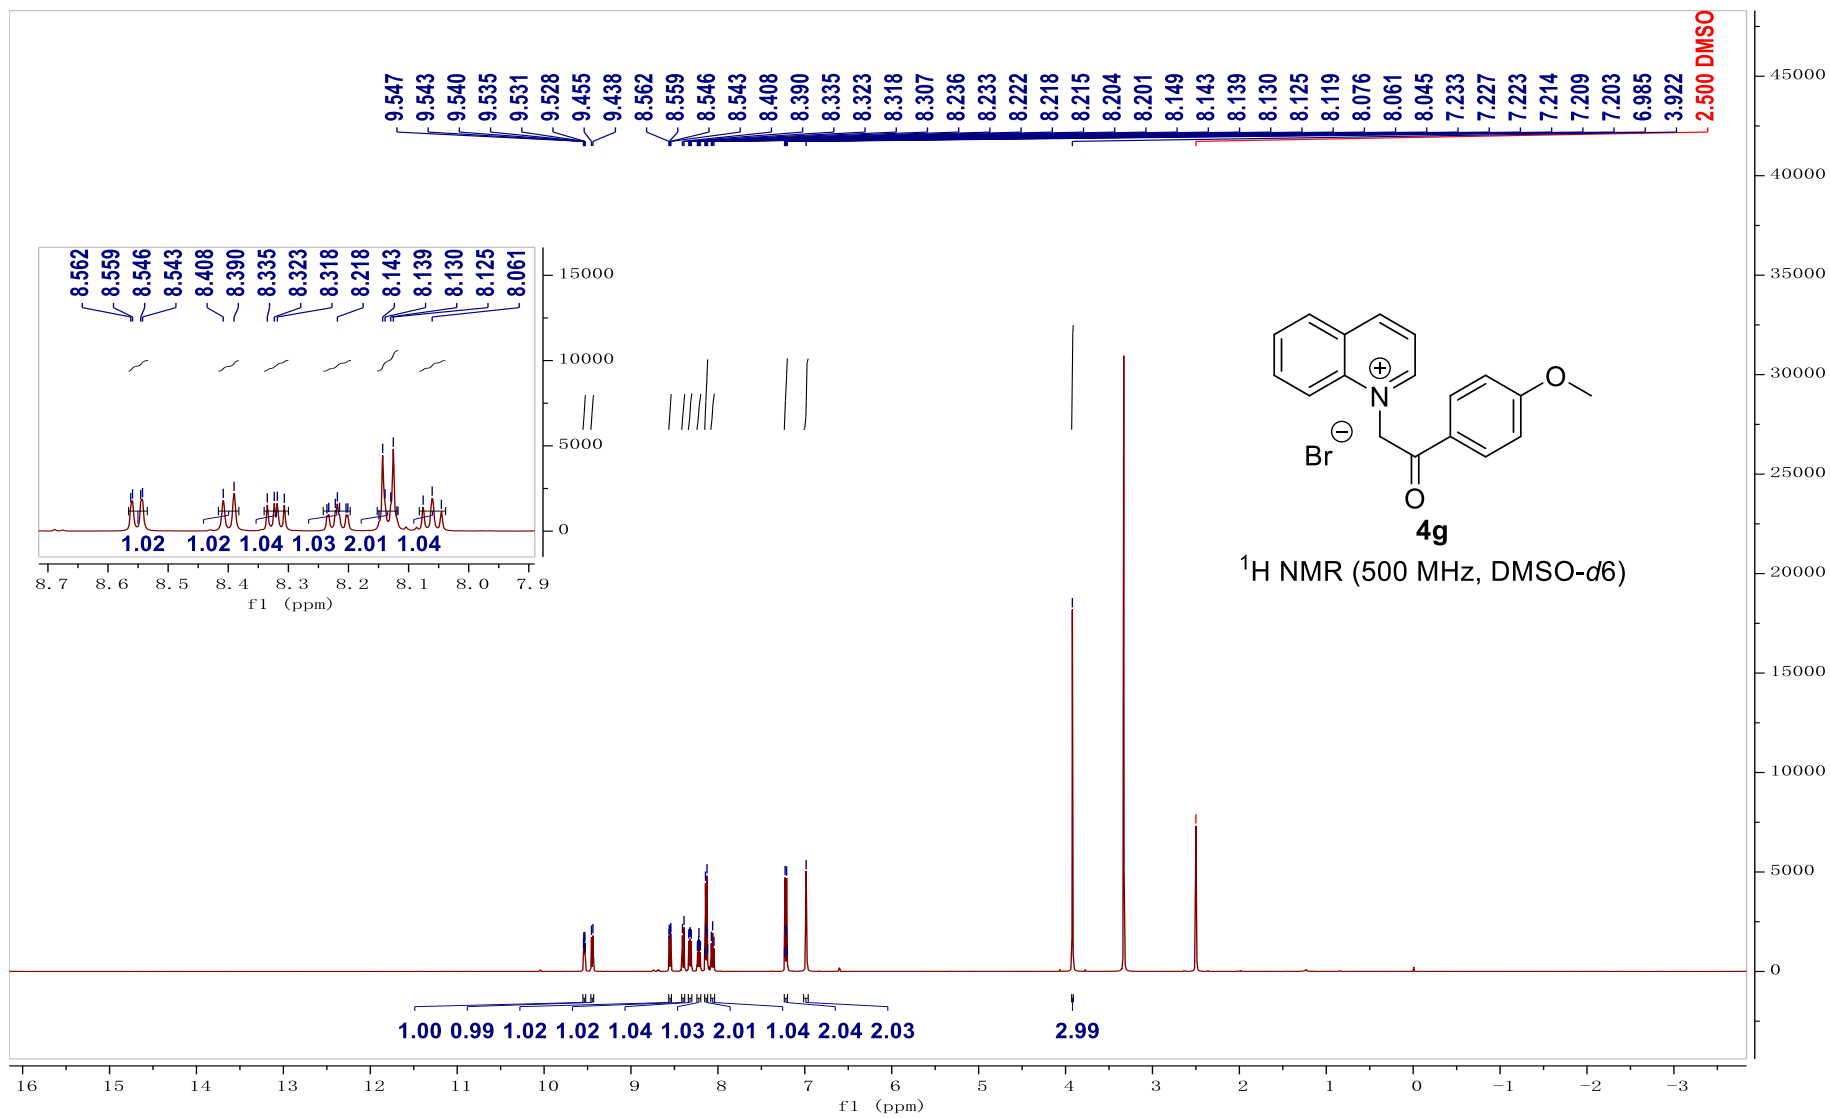

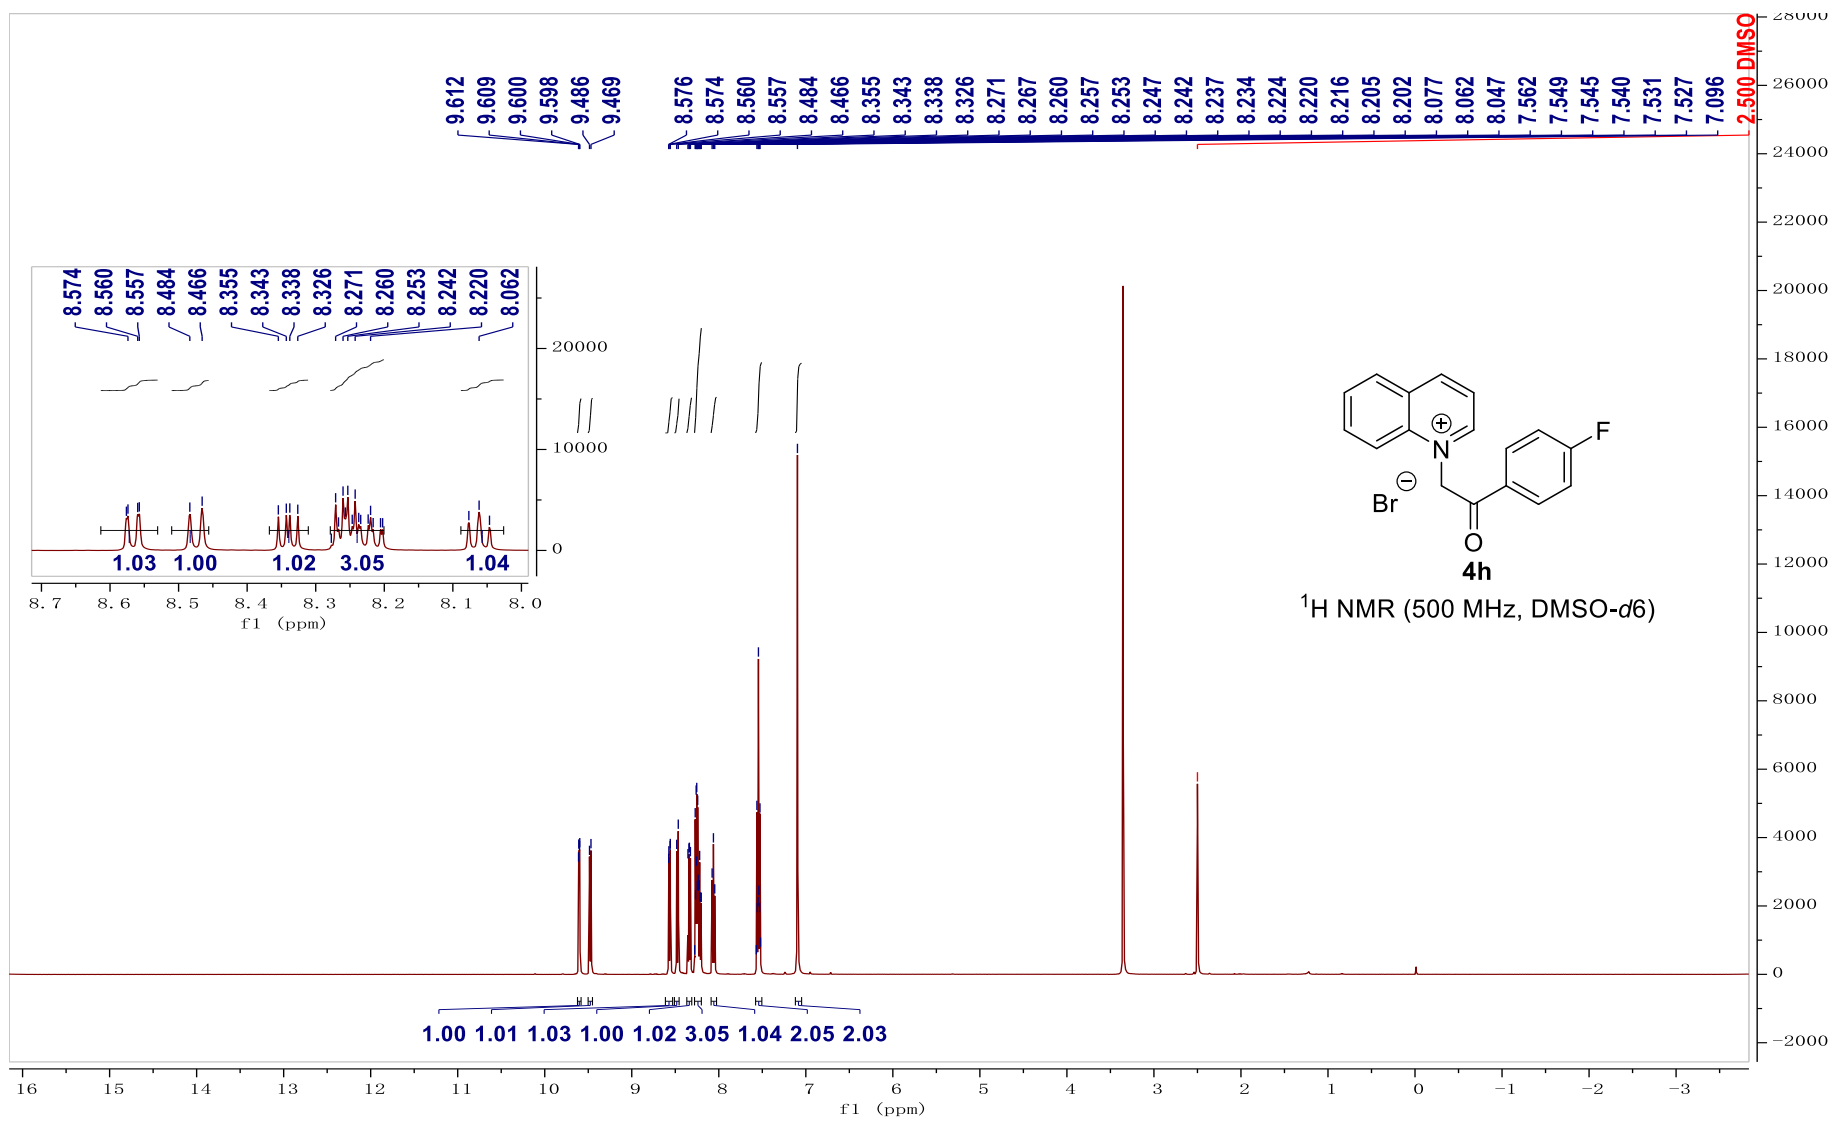

S133

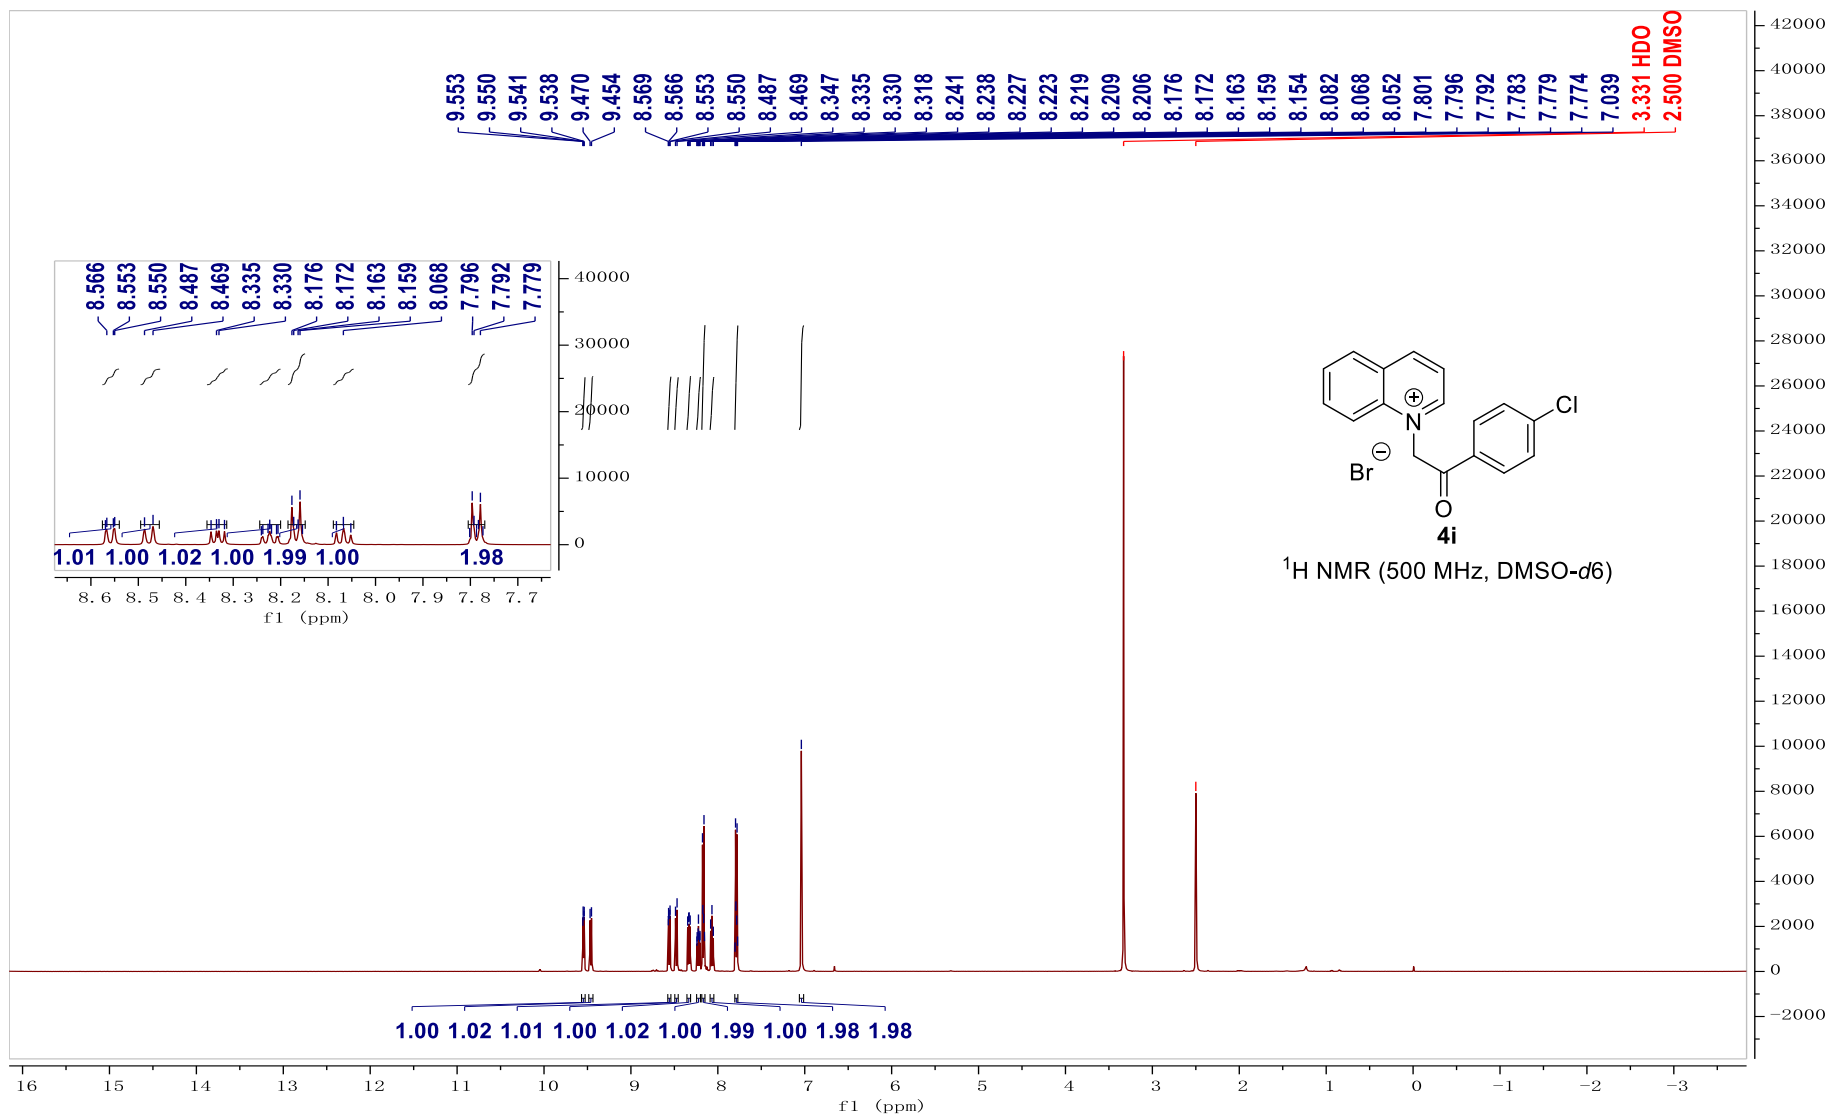



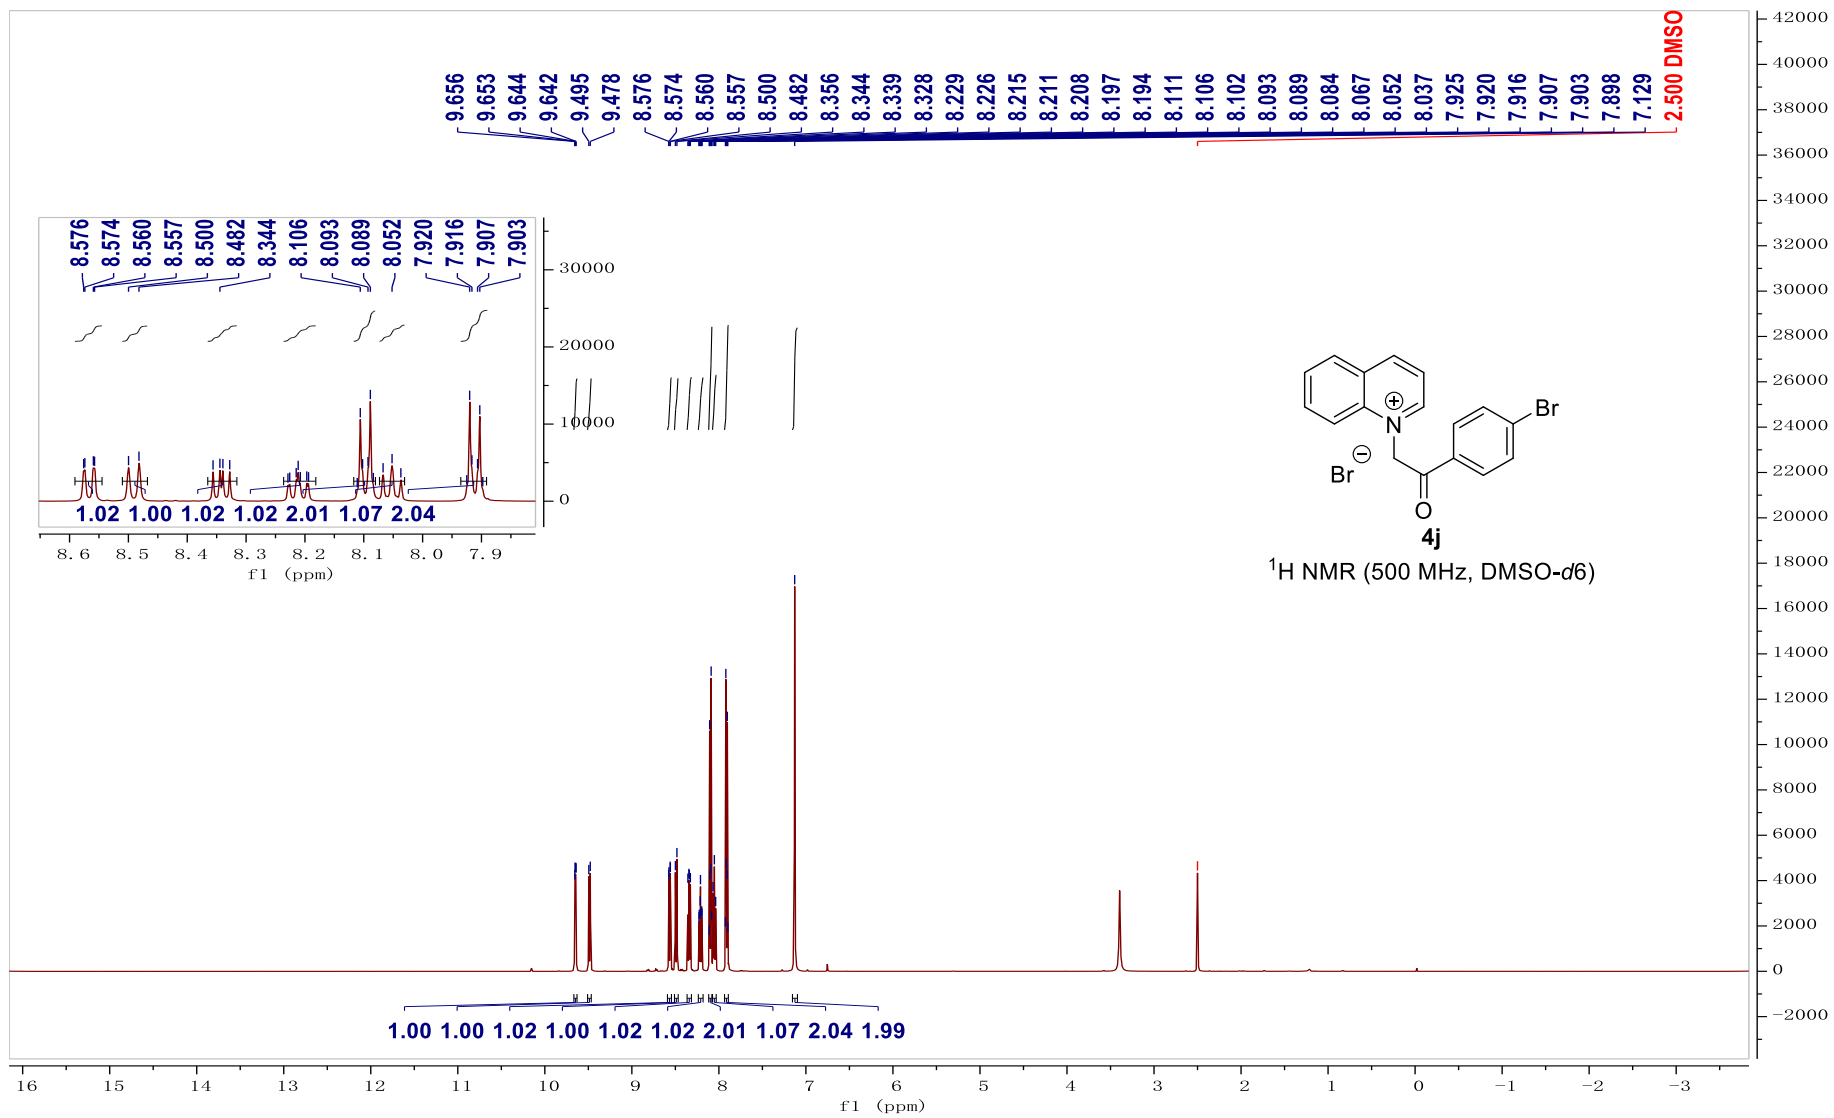

S135

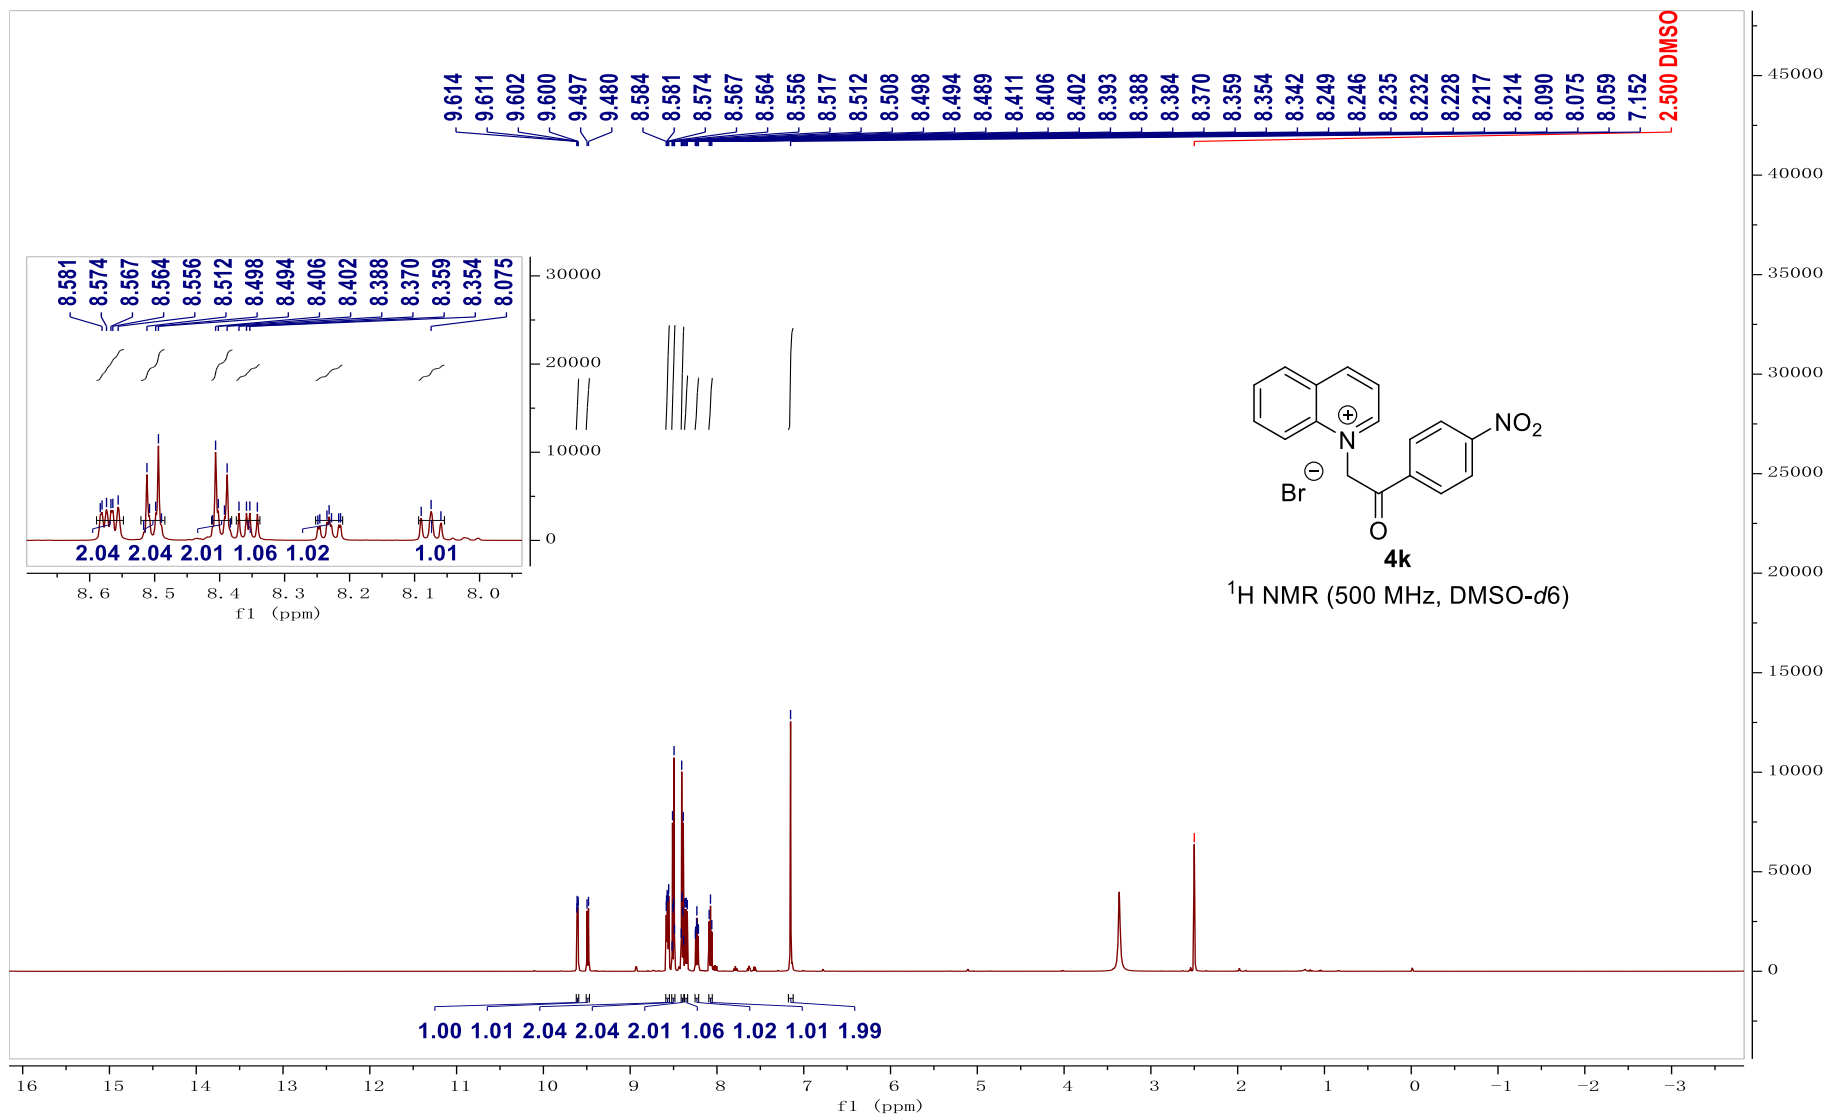

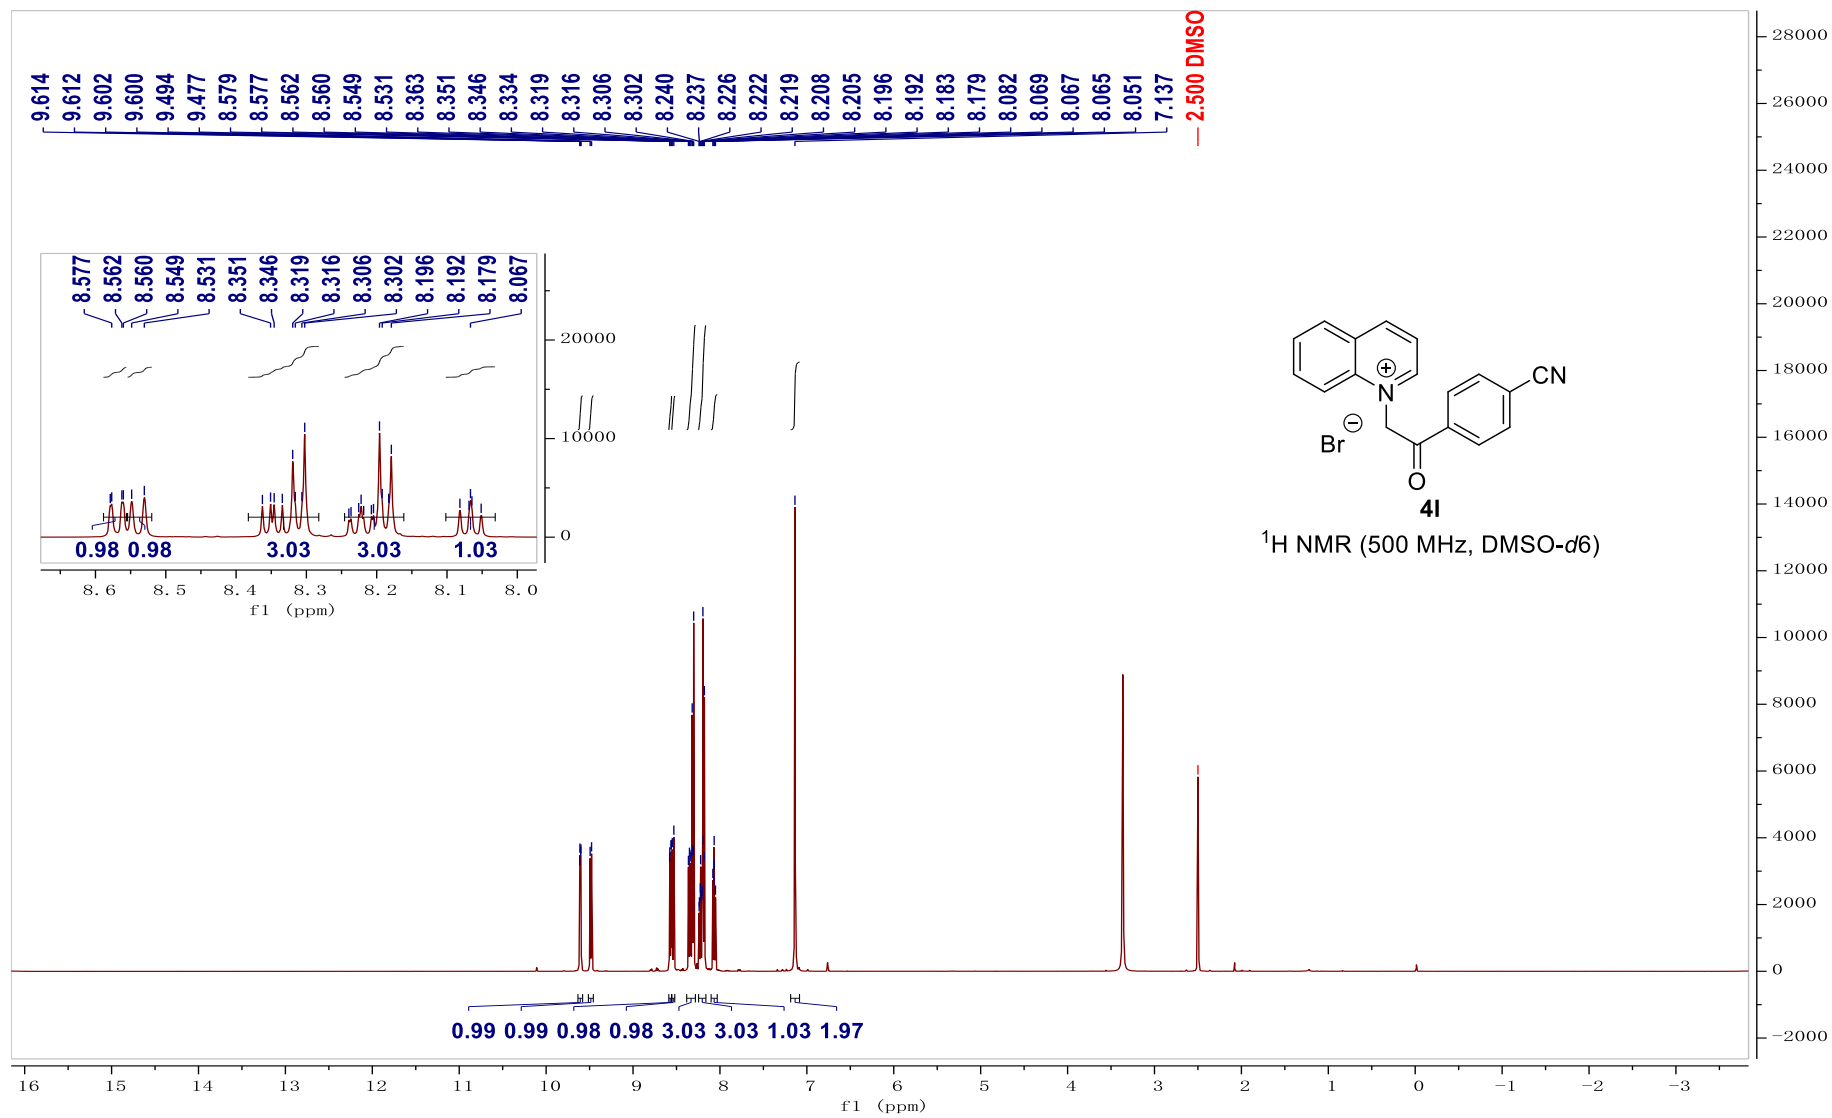

S137

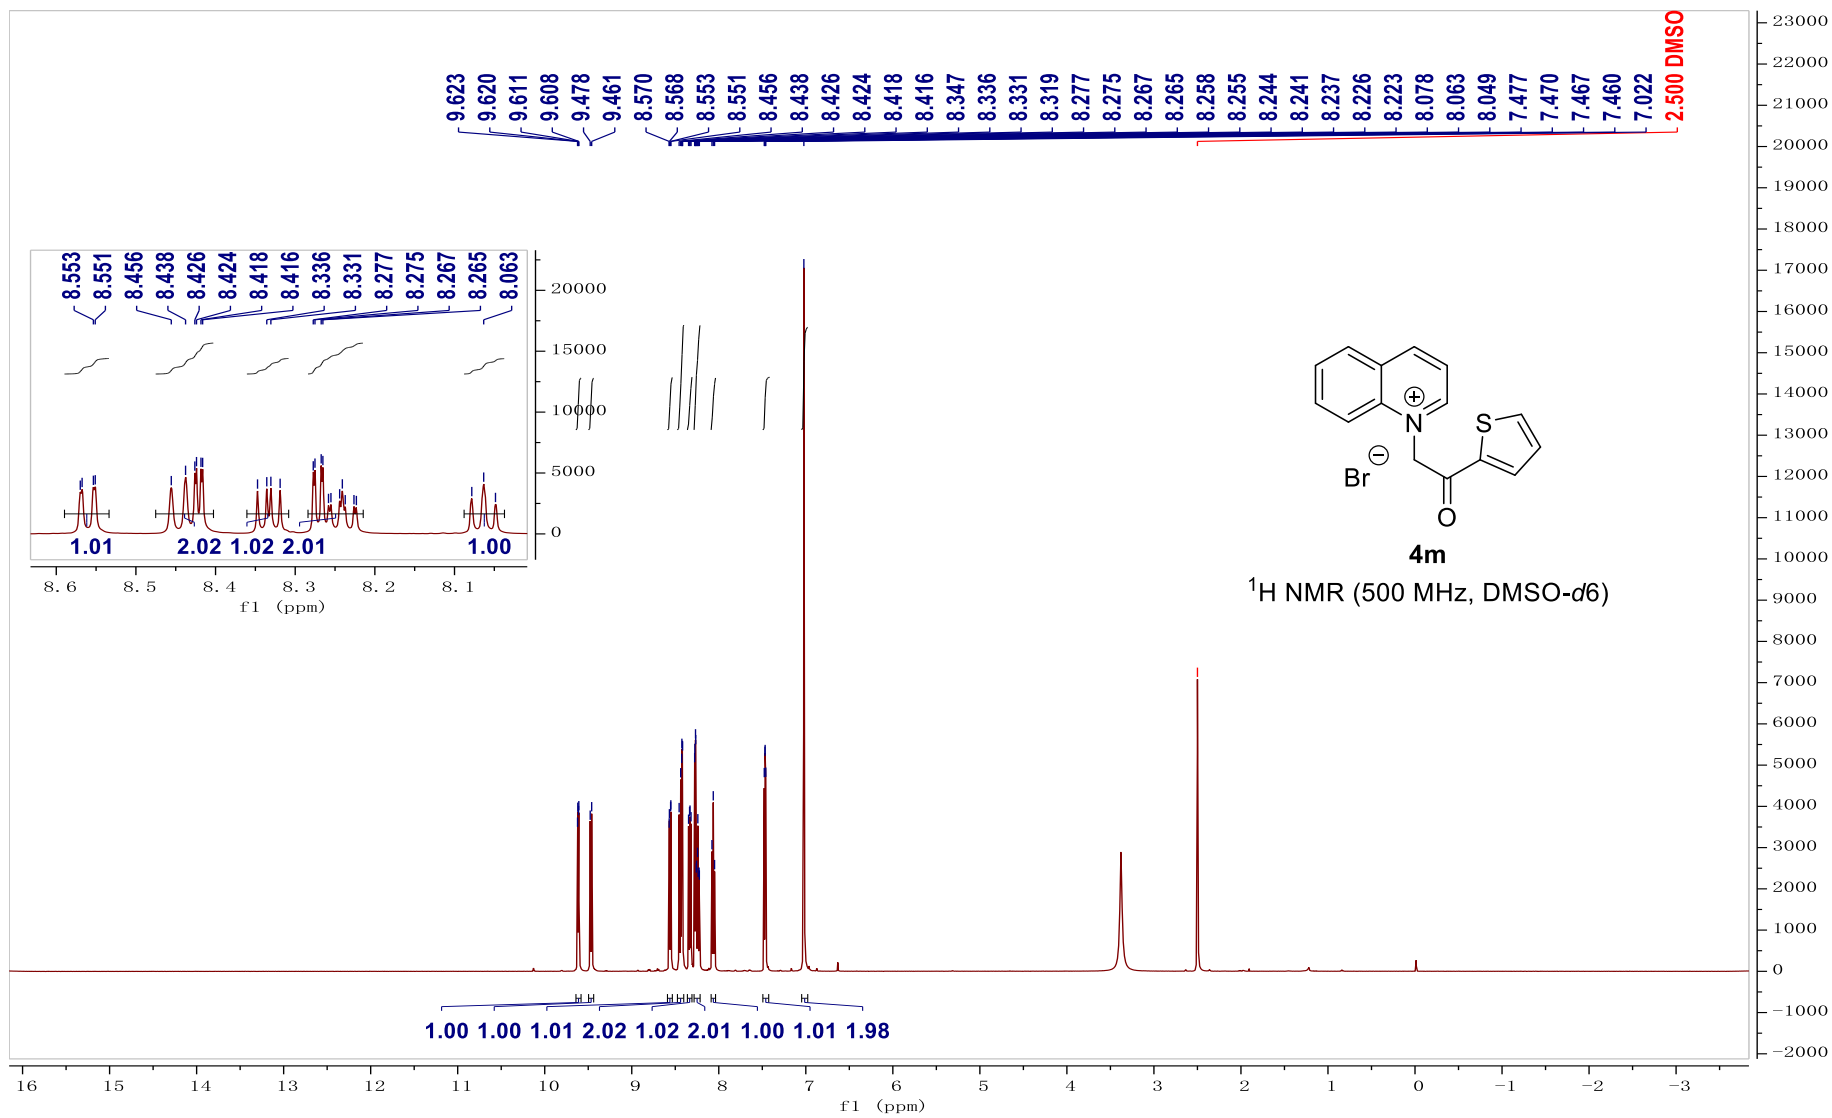

S138

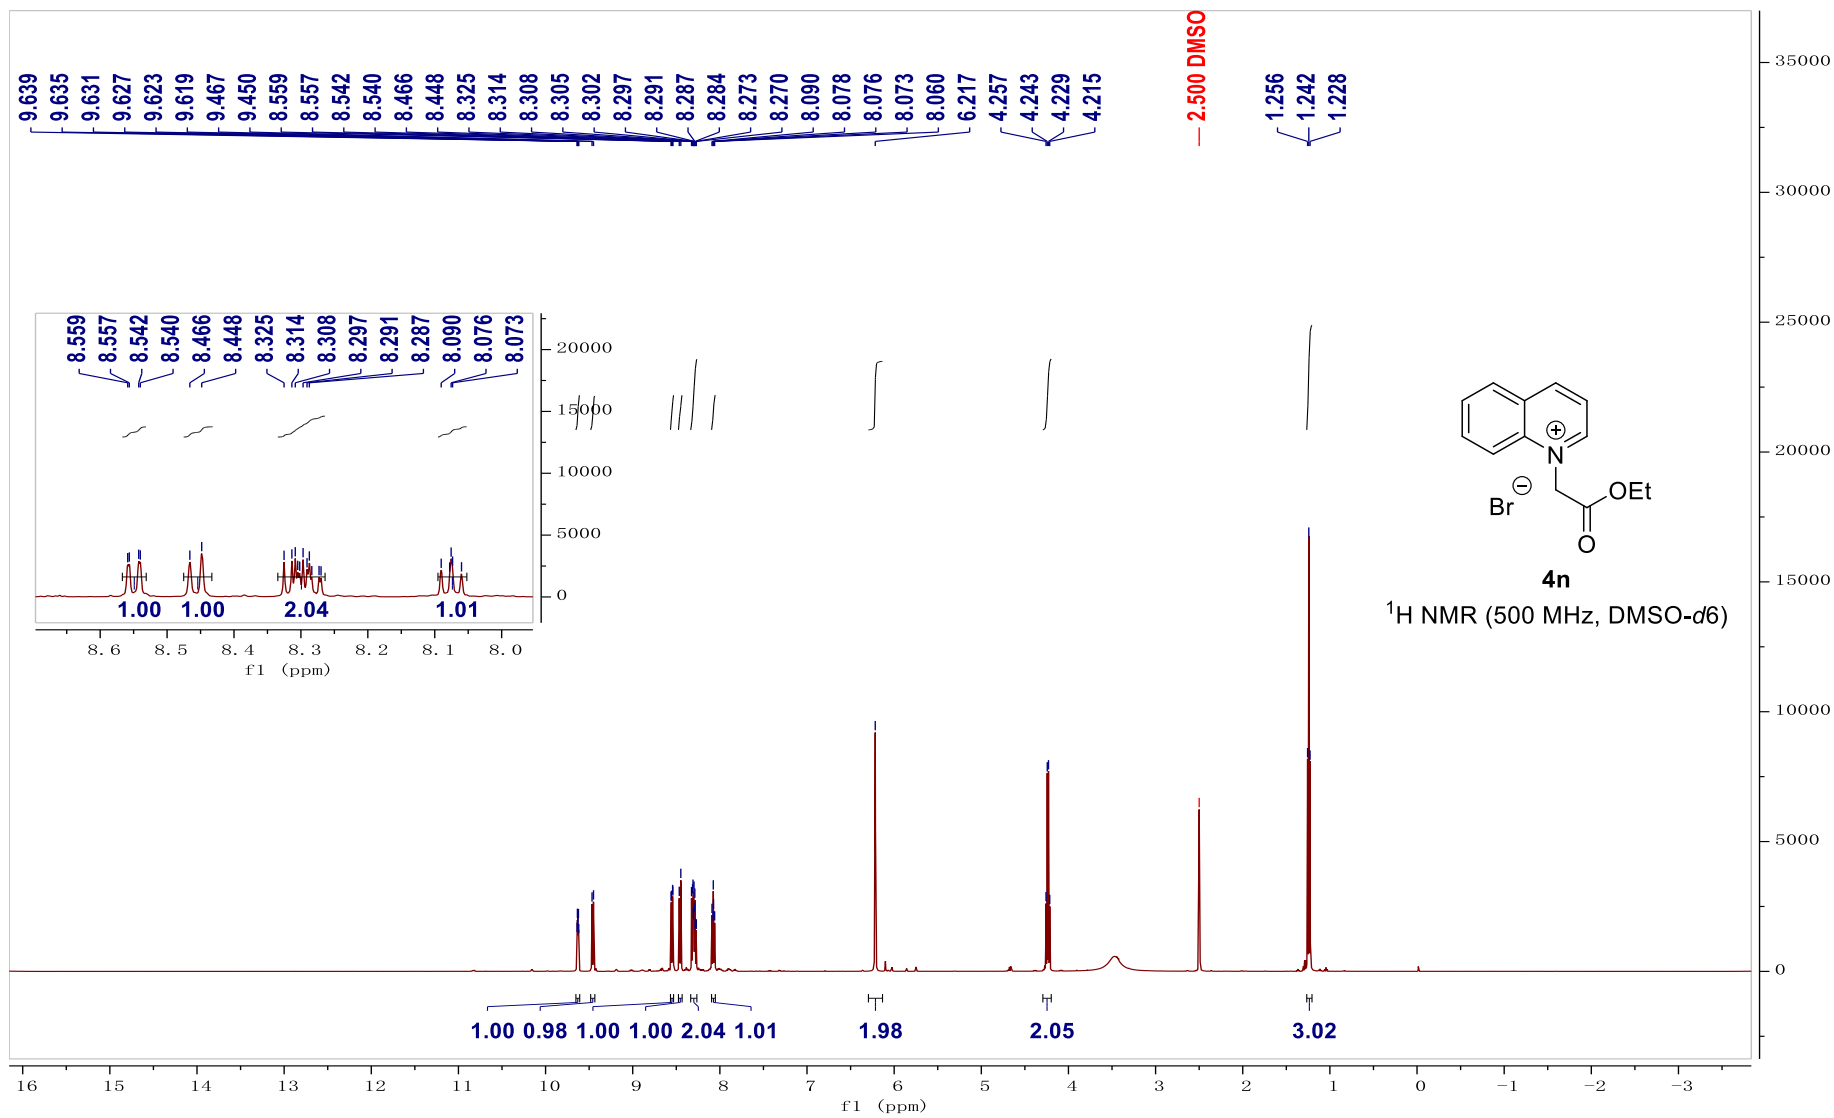

S139

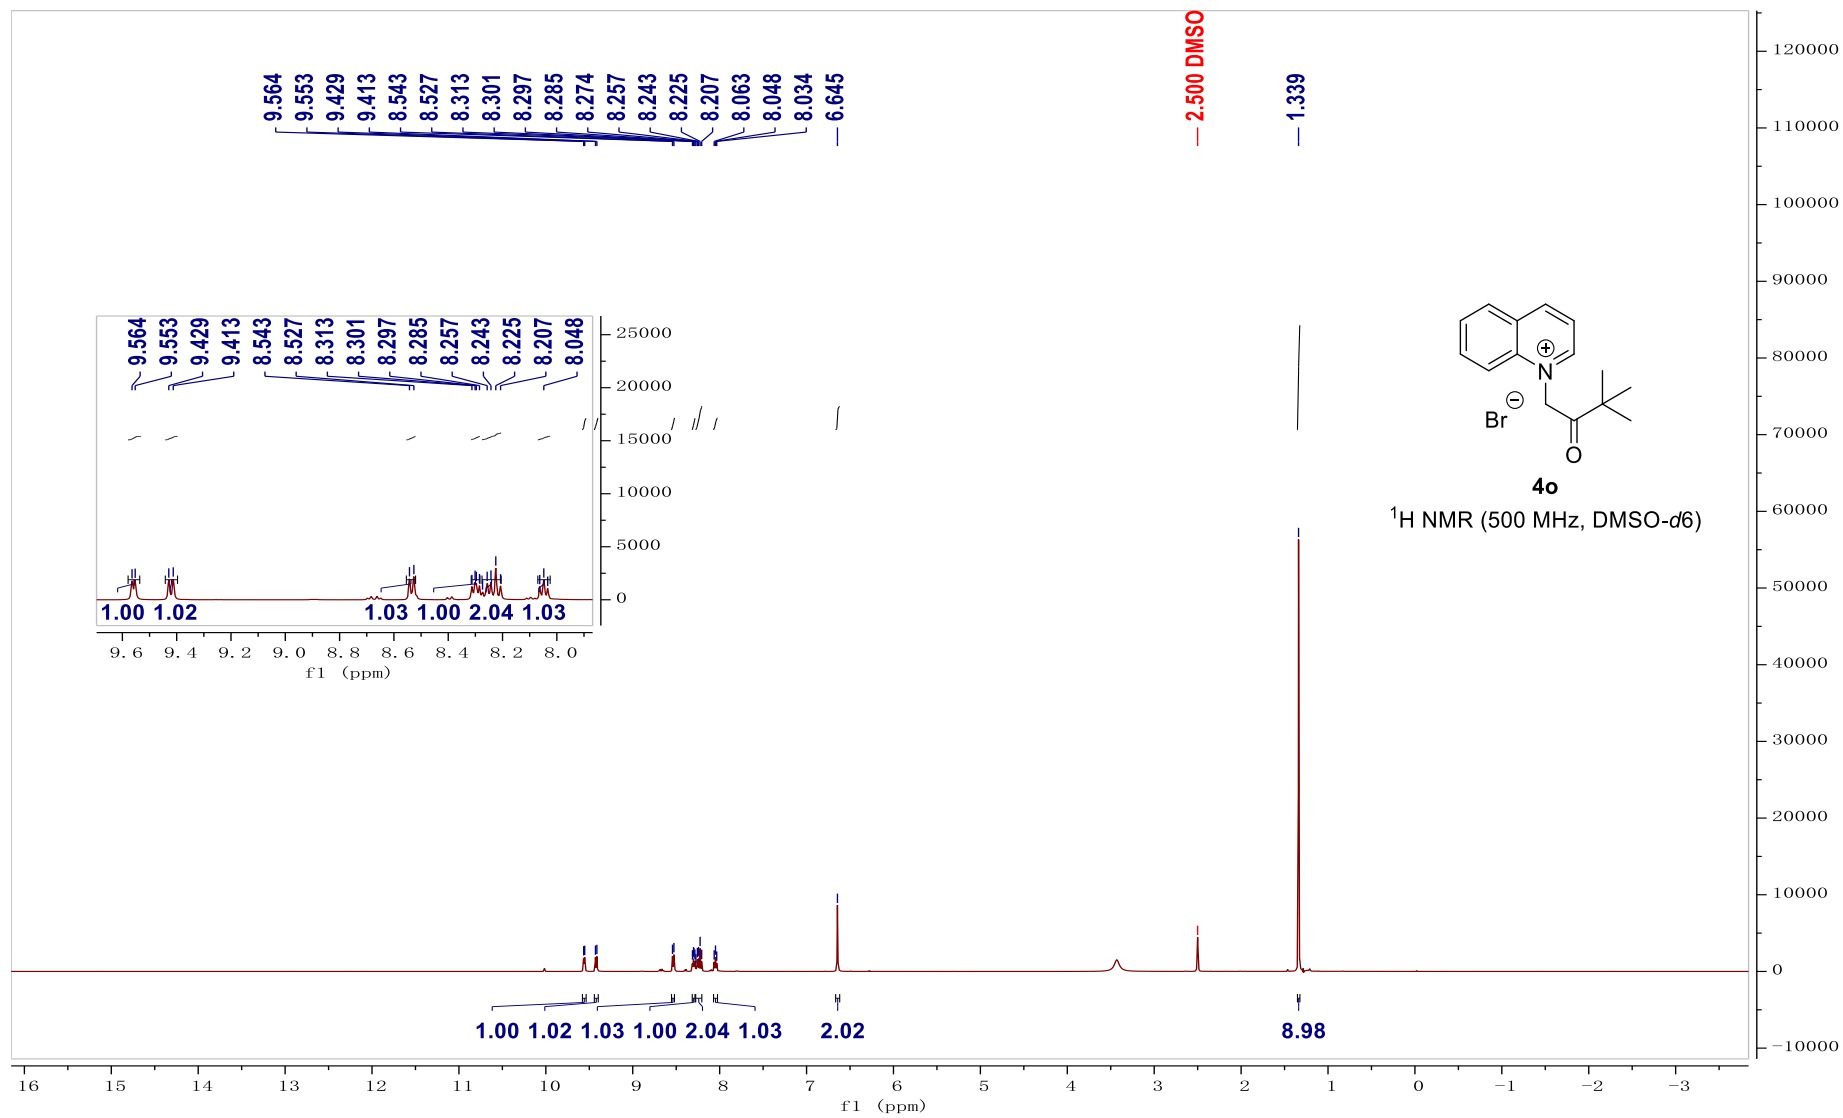

S140

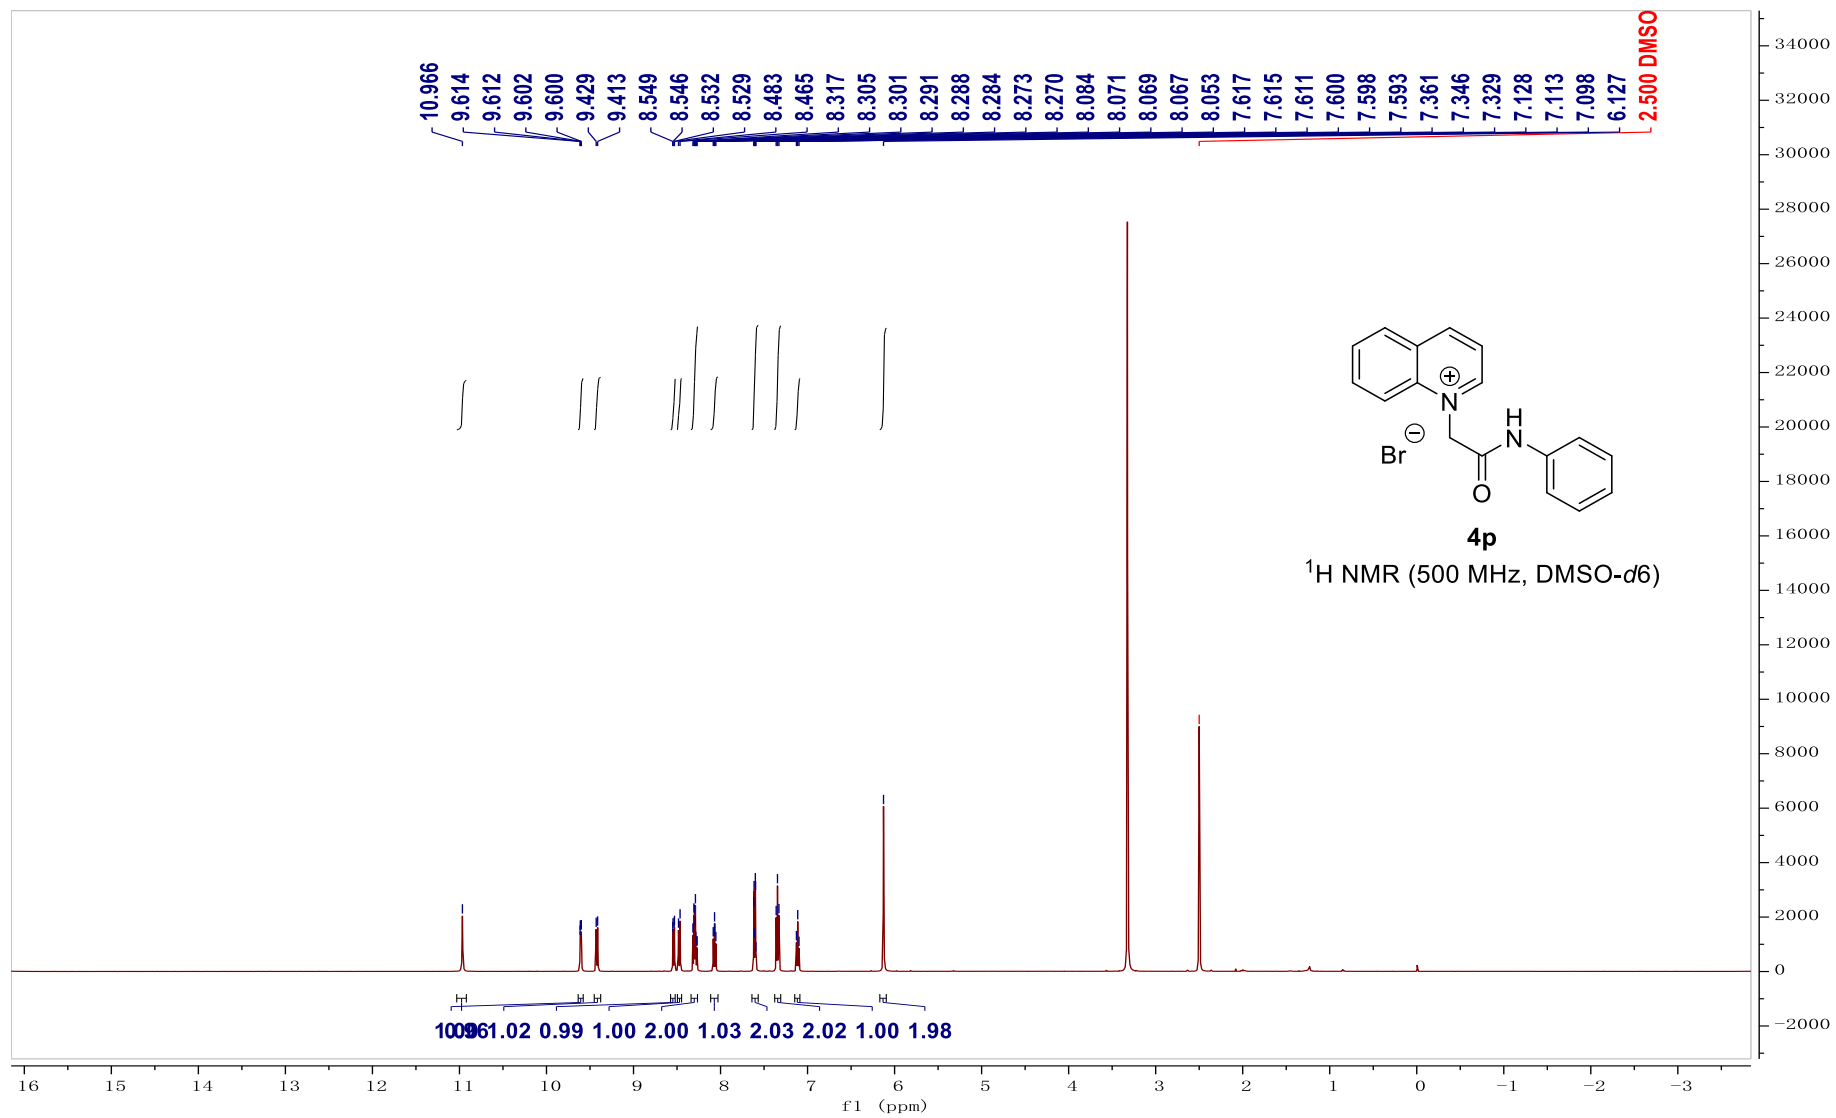

S141

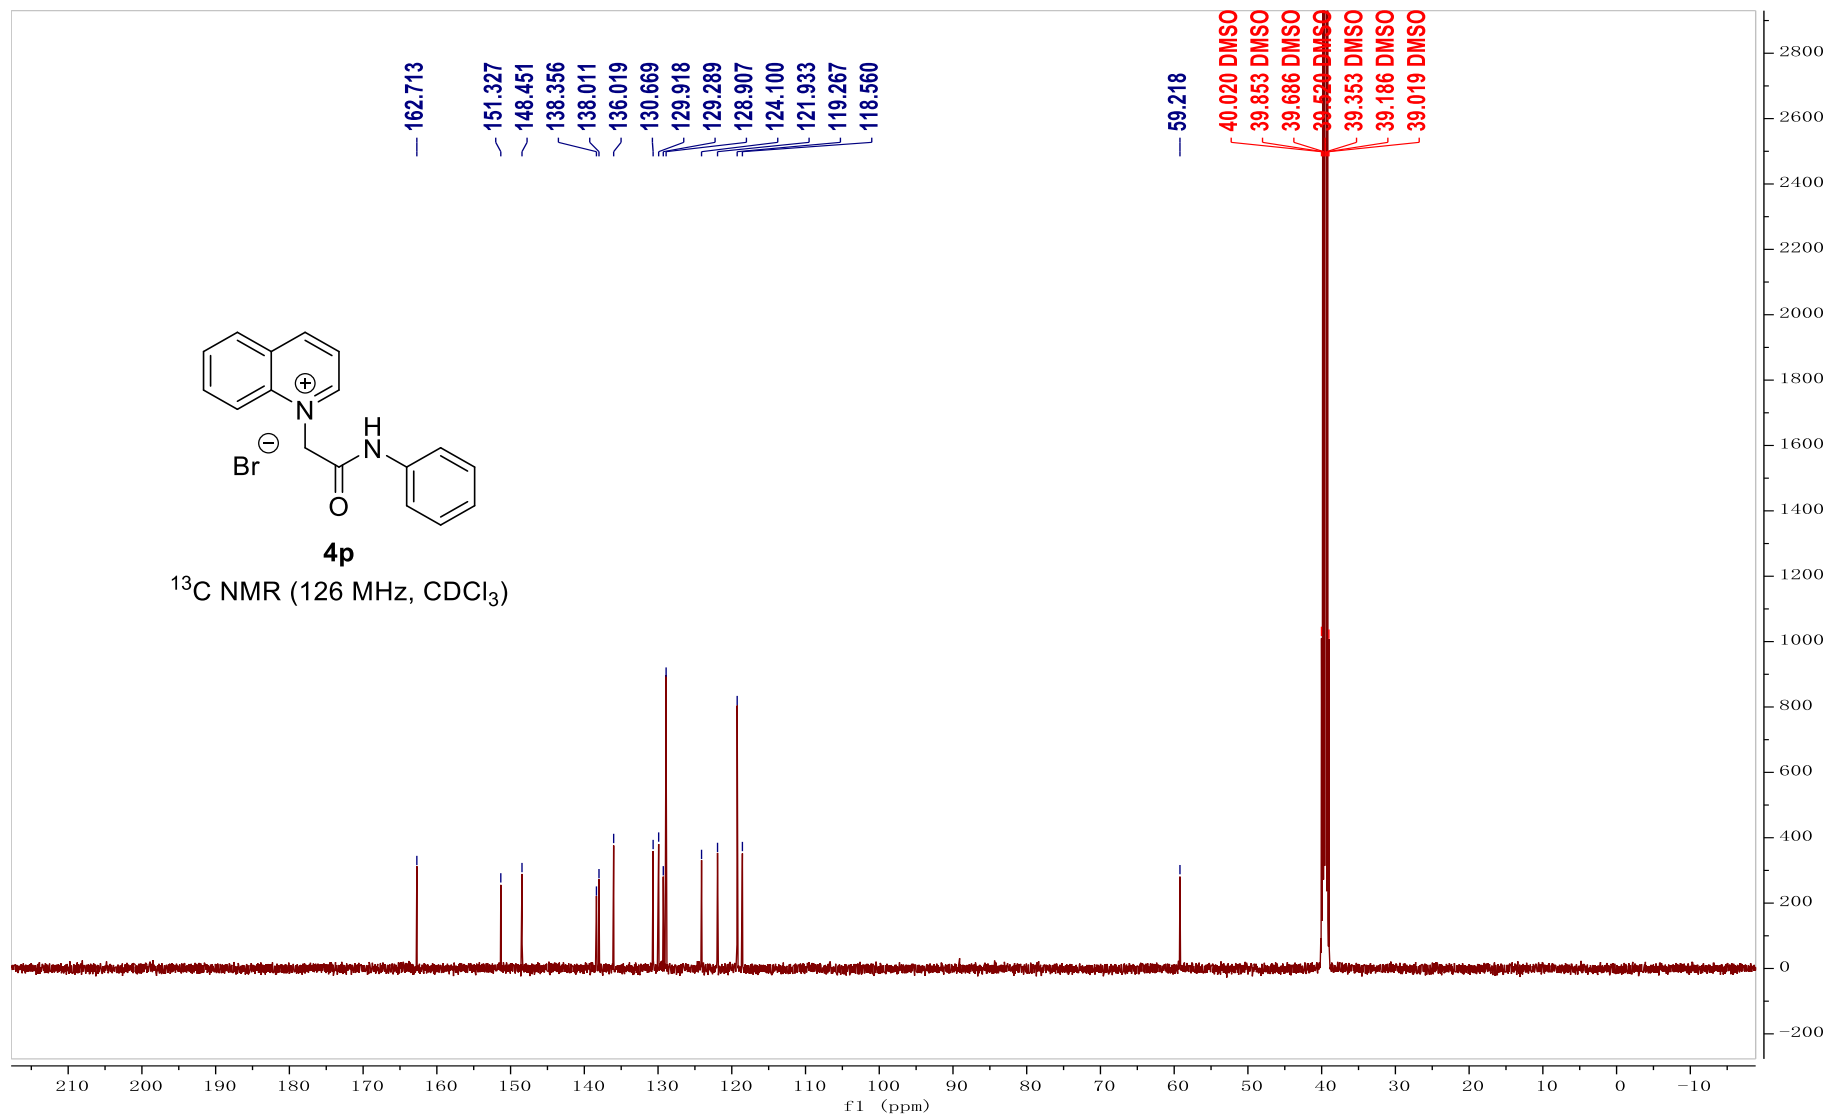



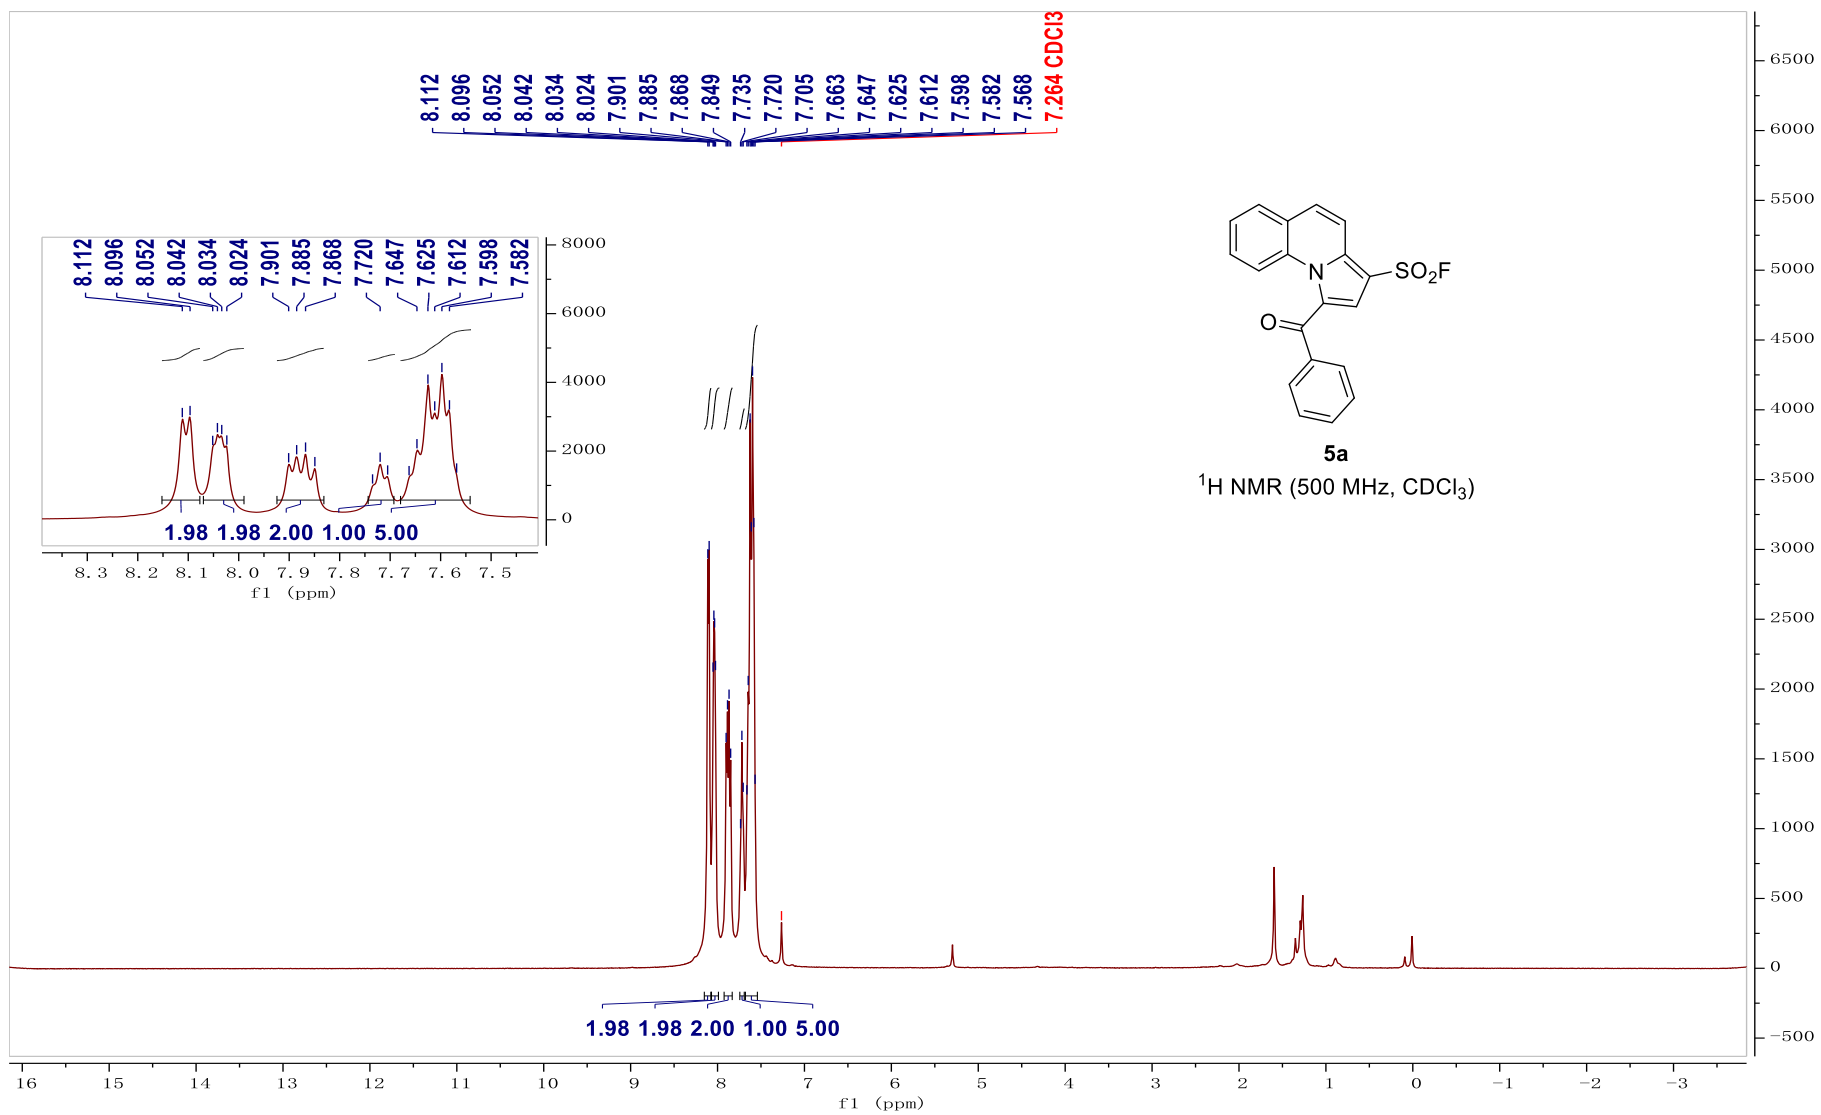

S143

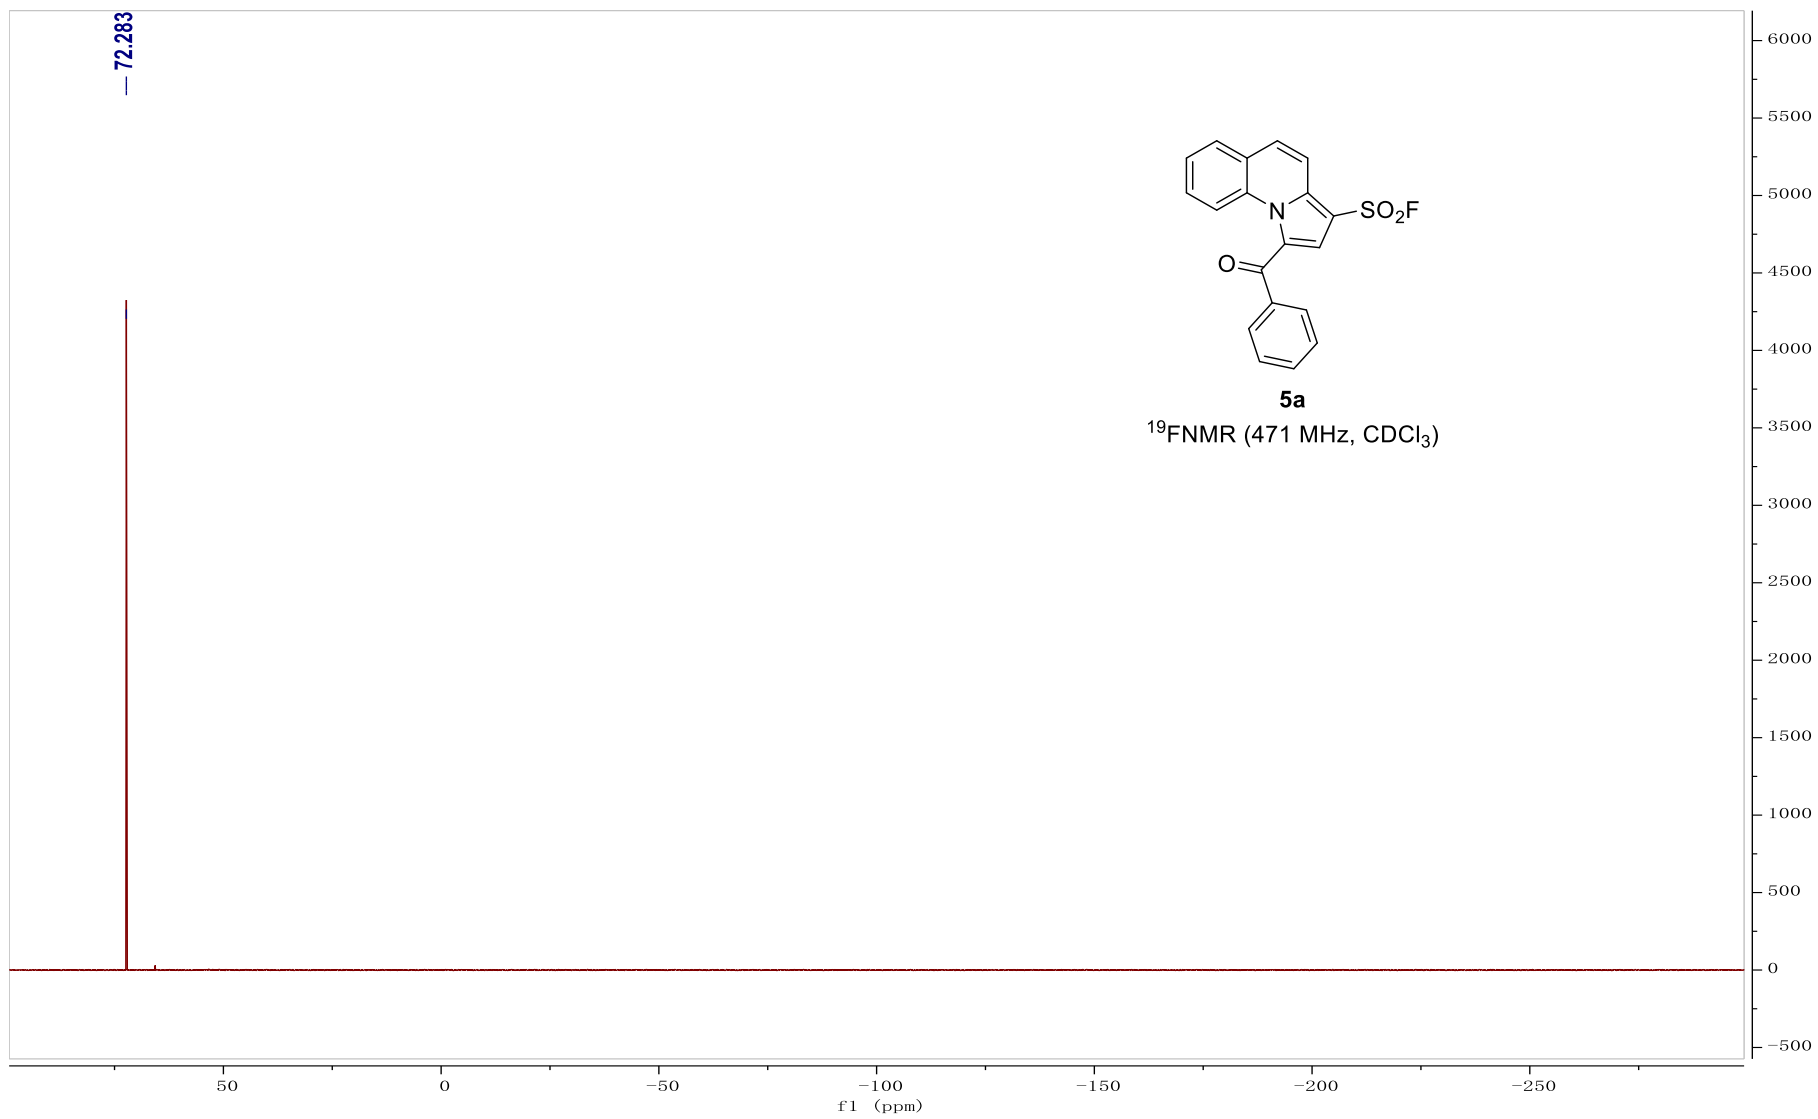

S144

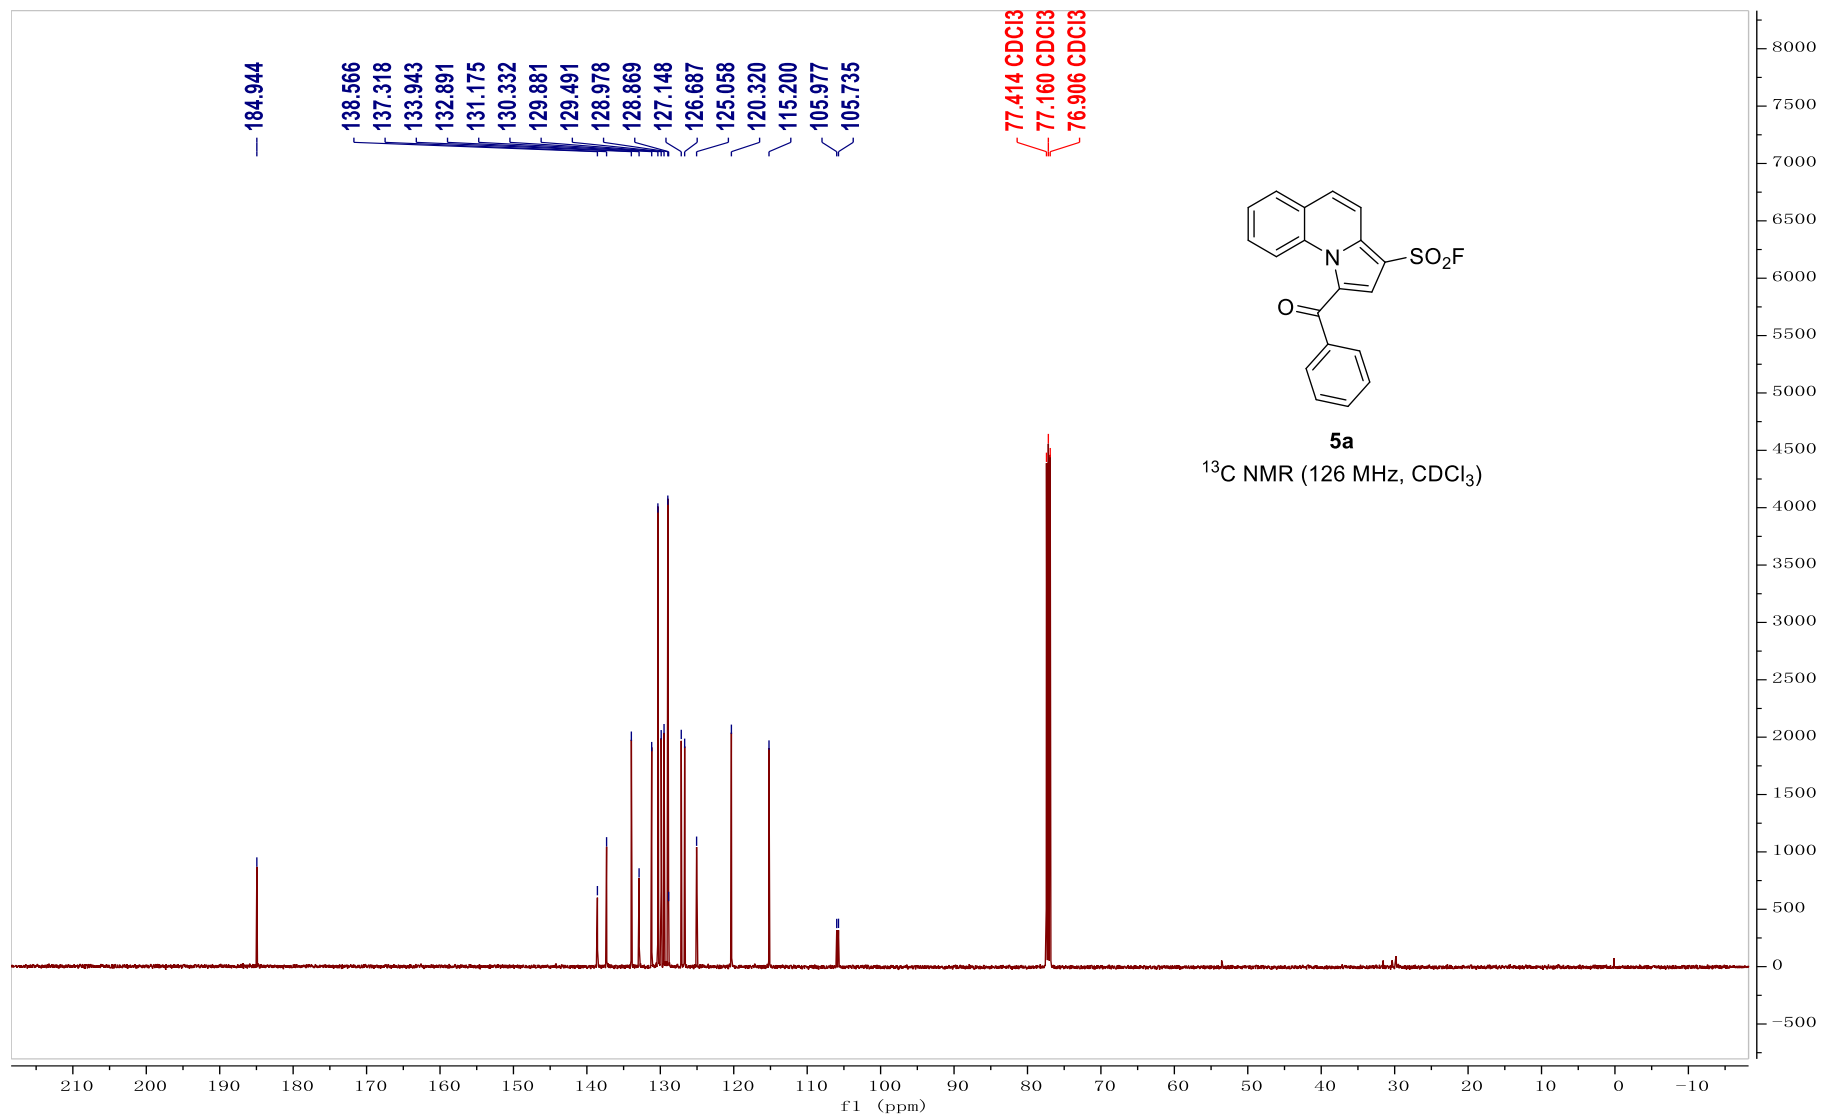

S145

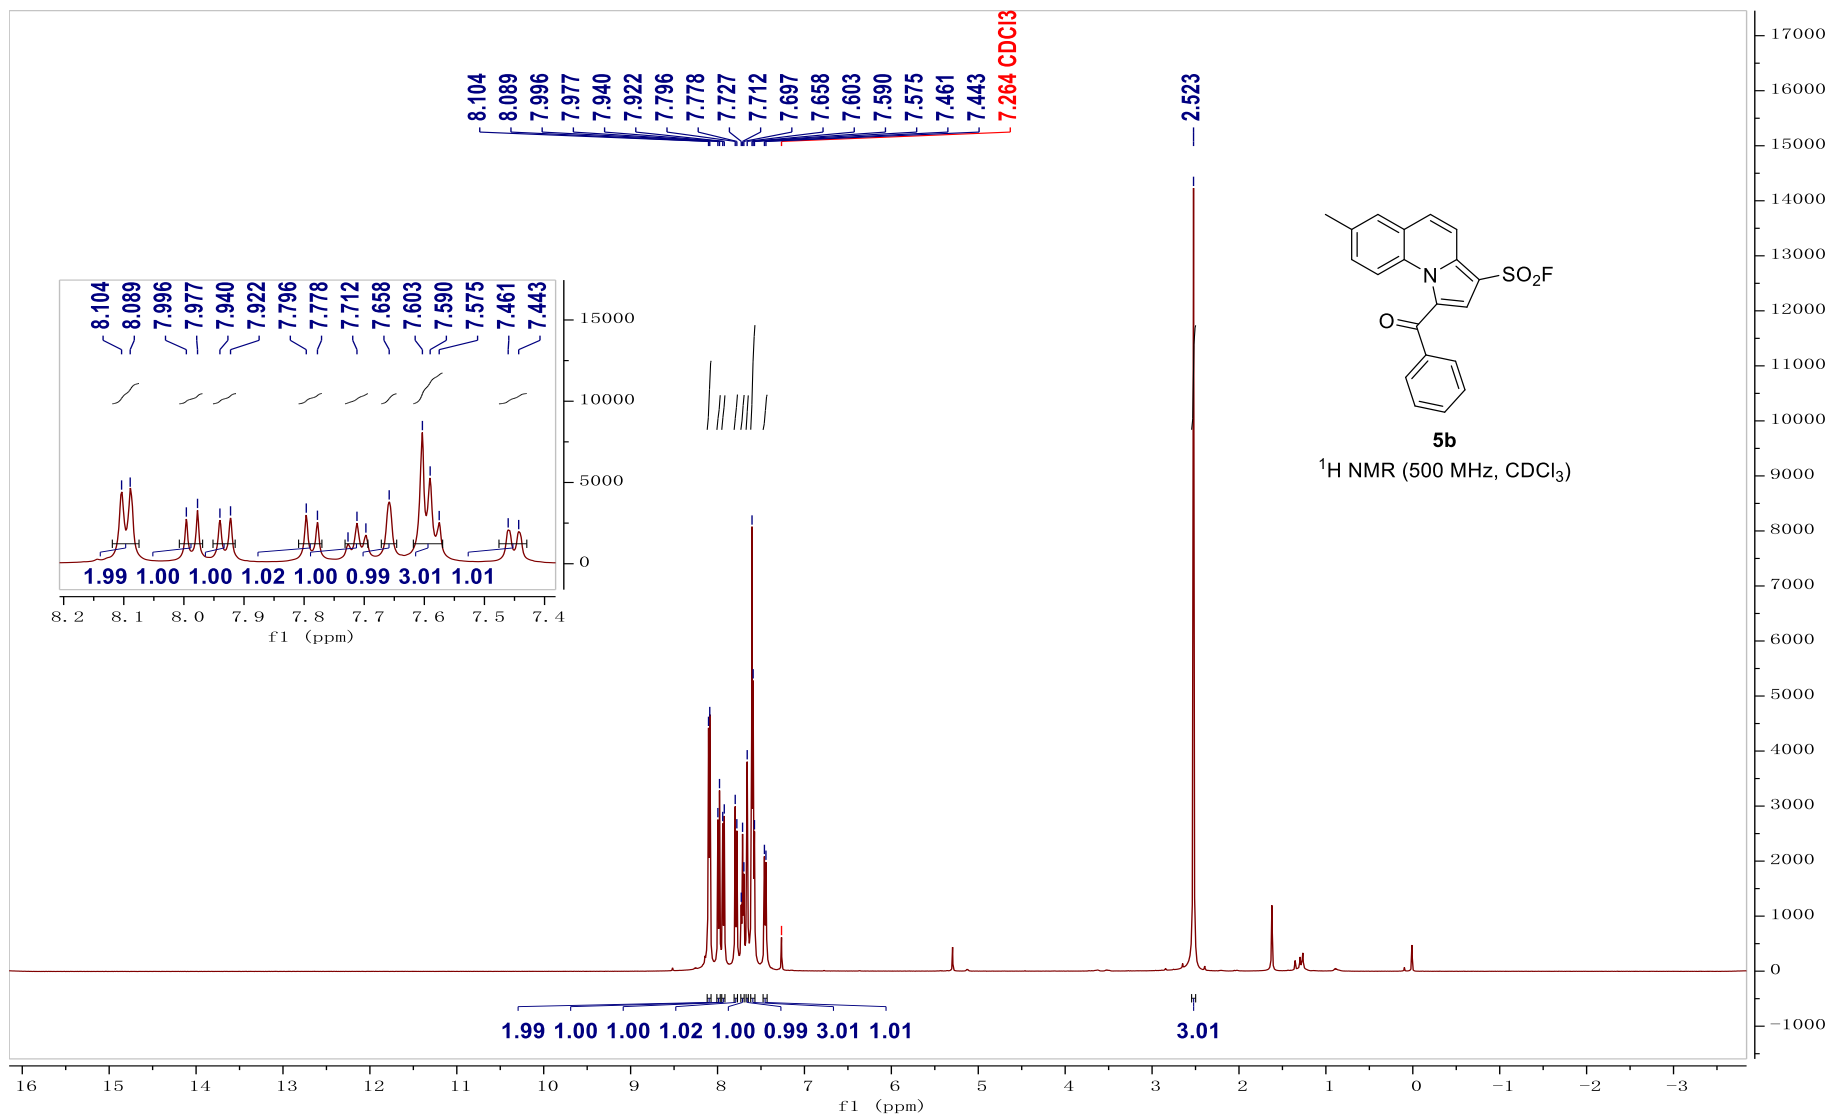

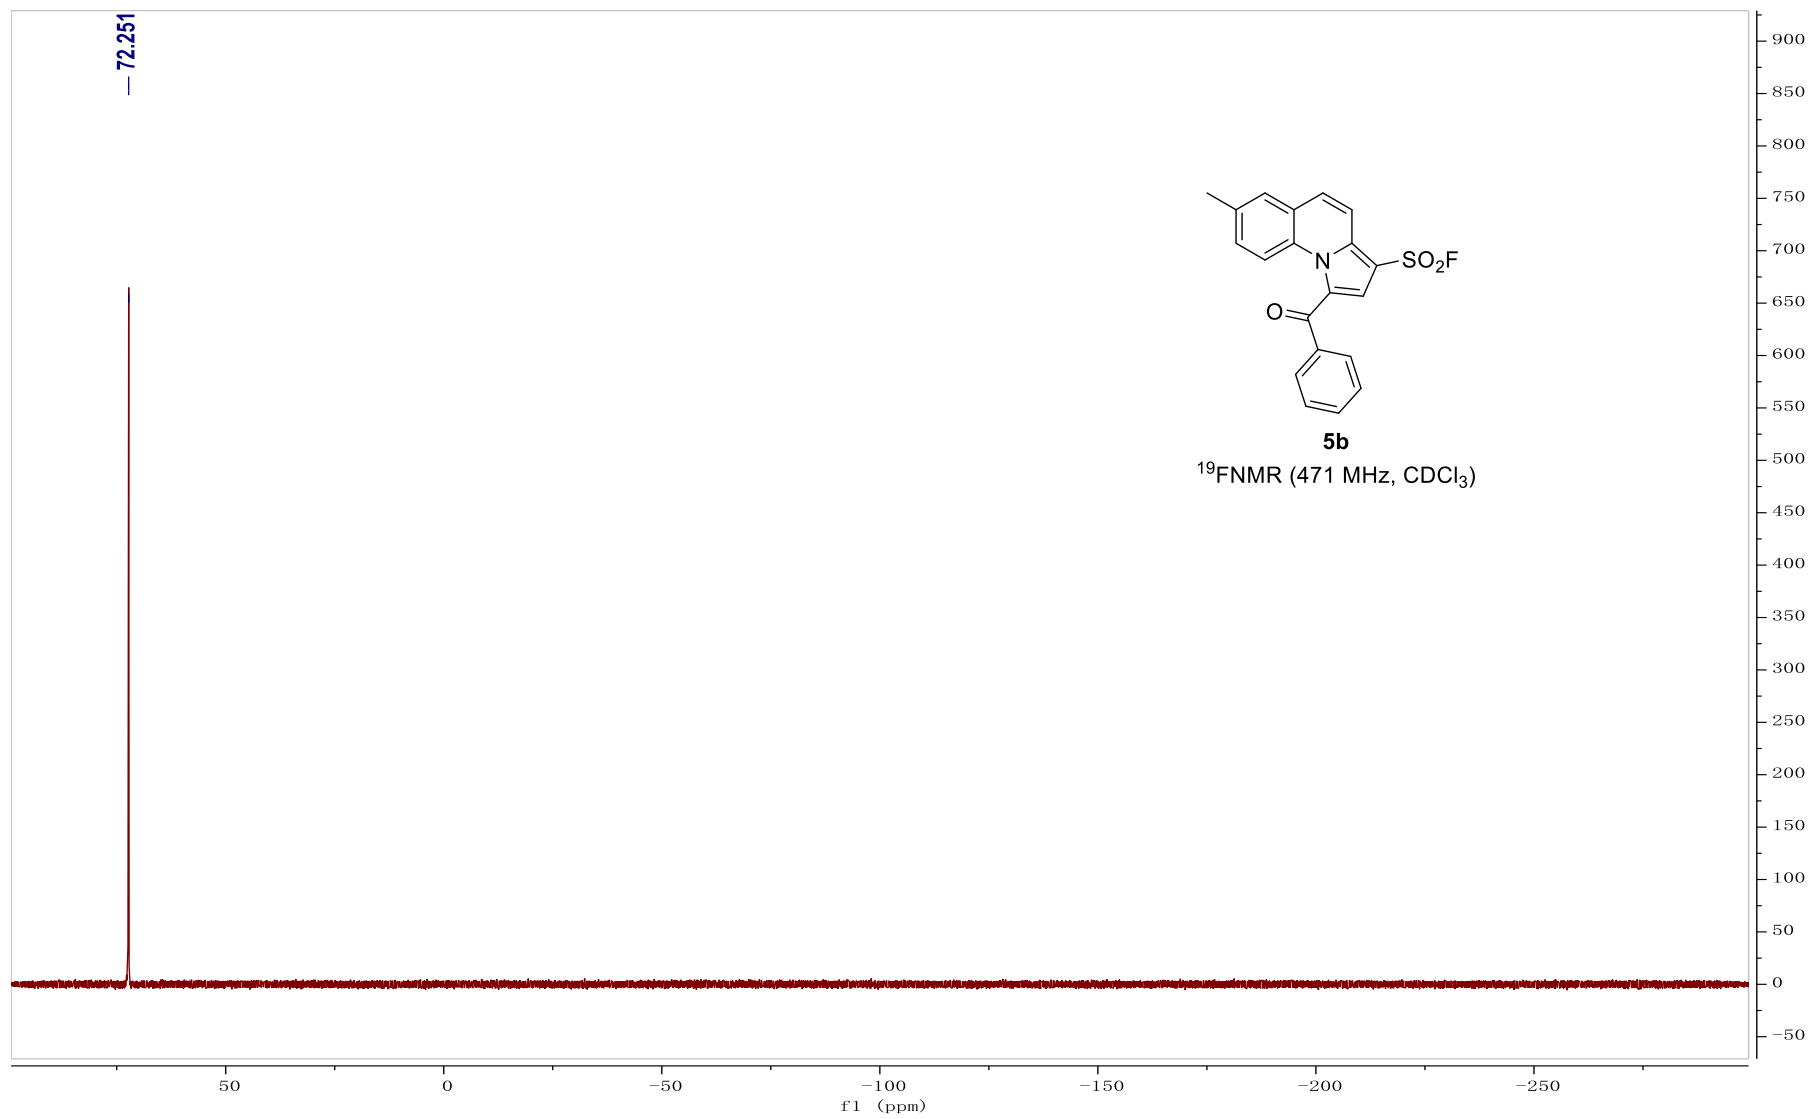

S147

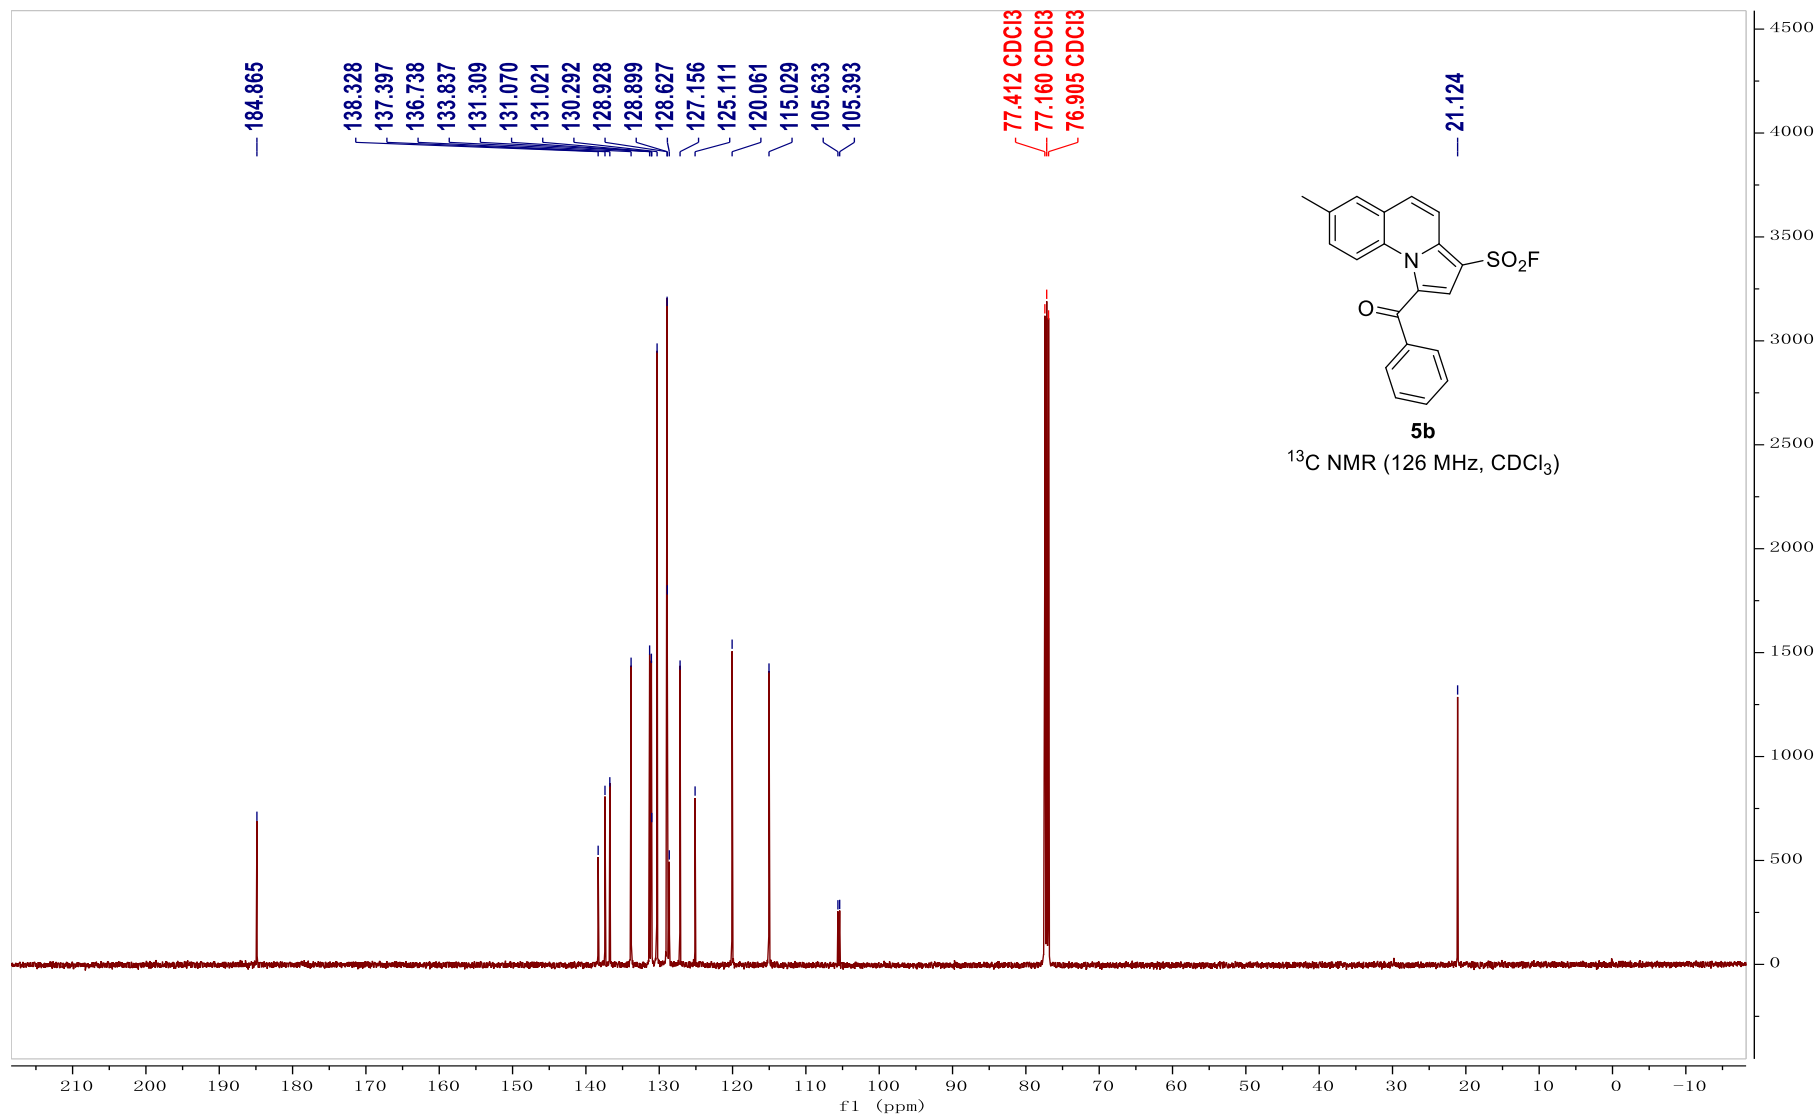

S148

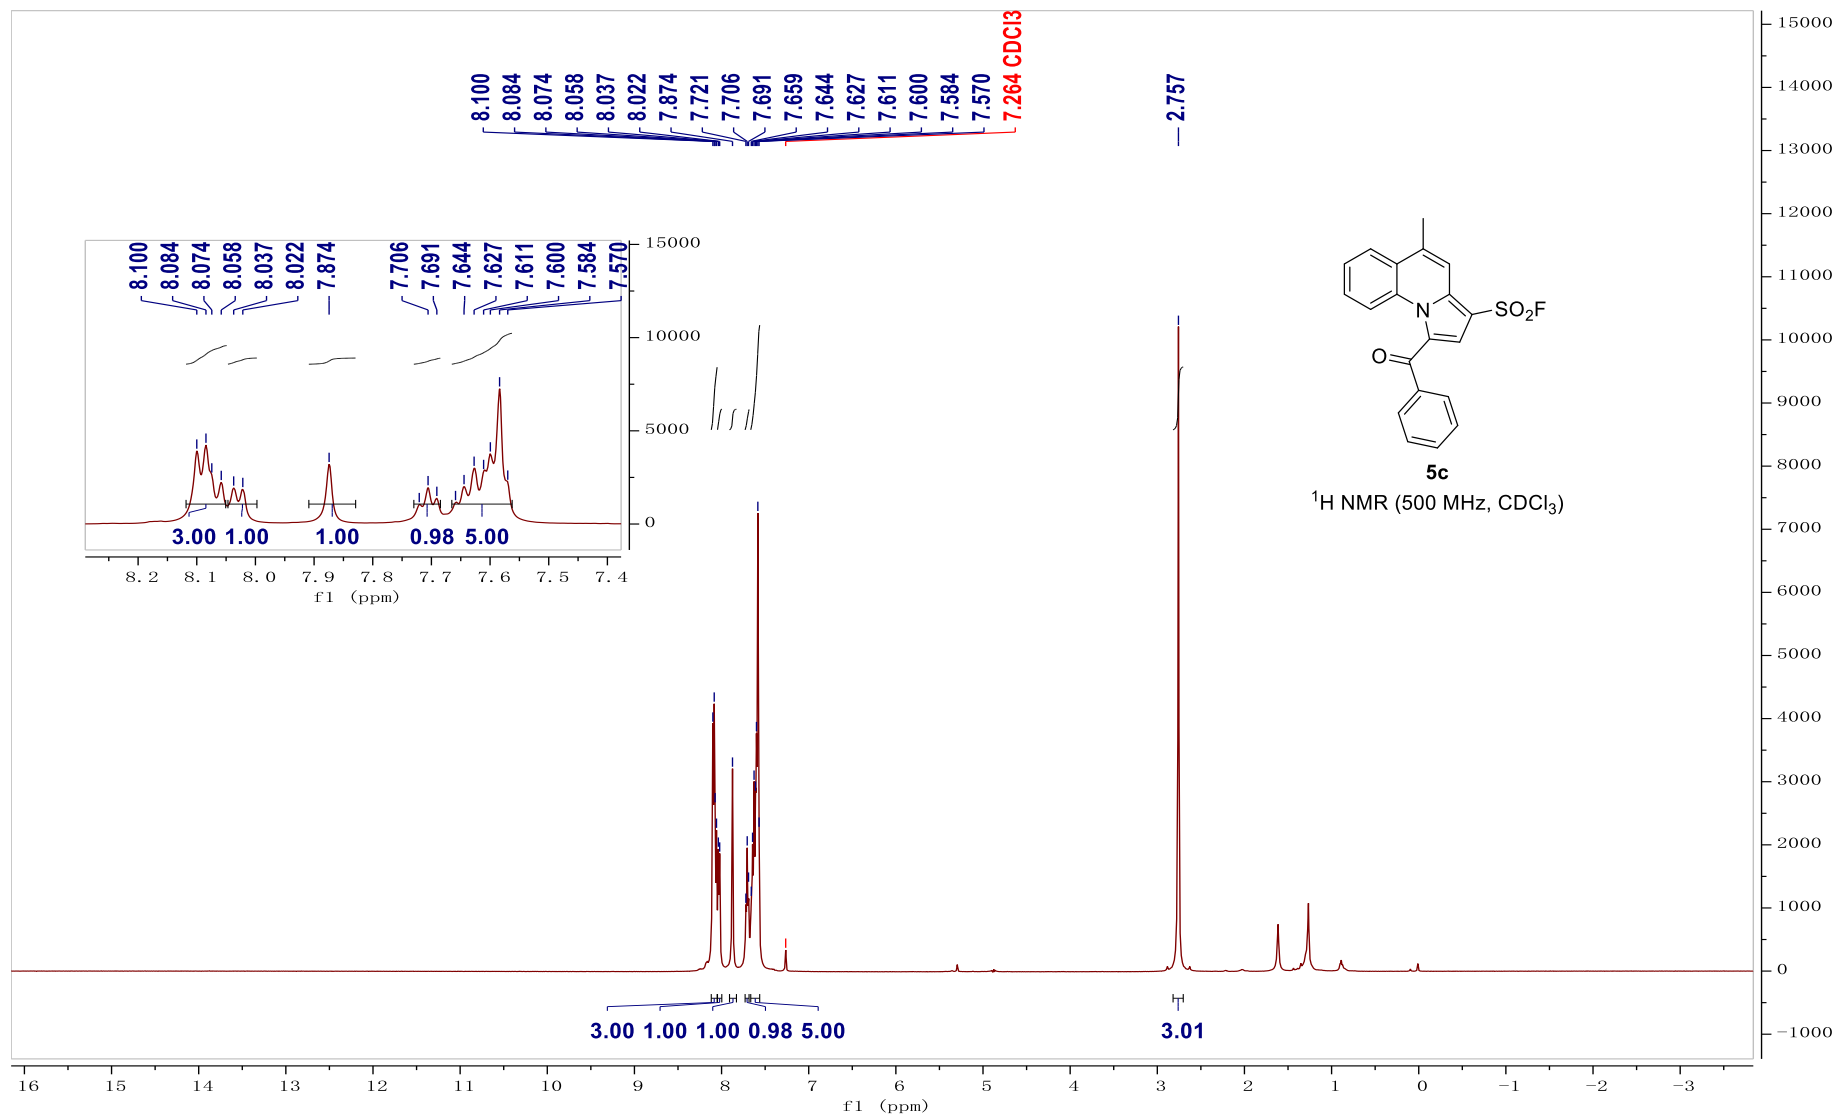

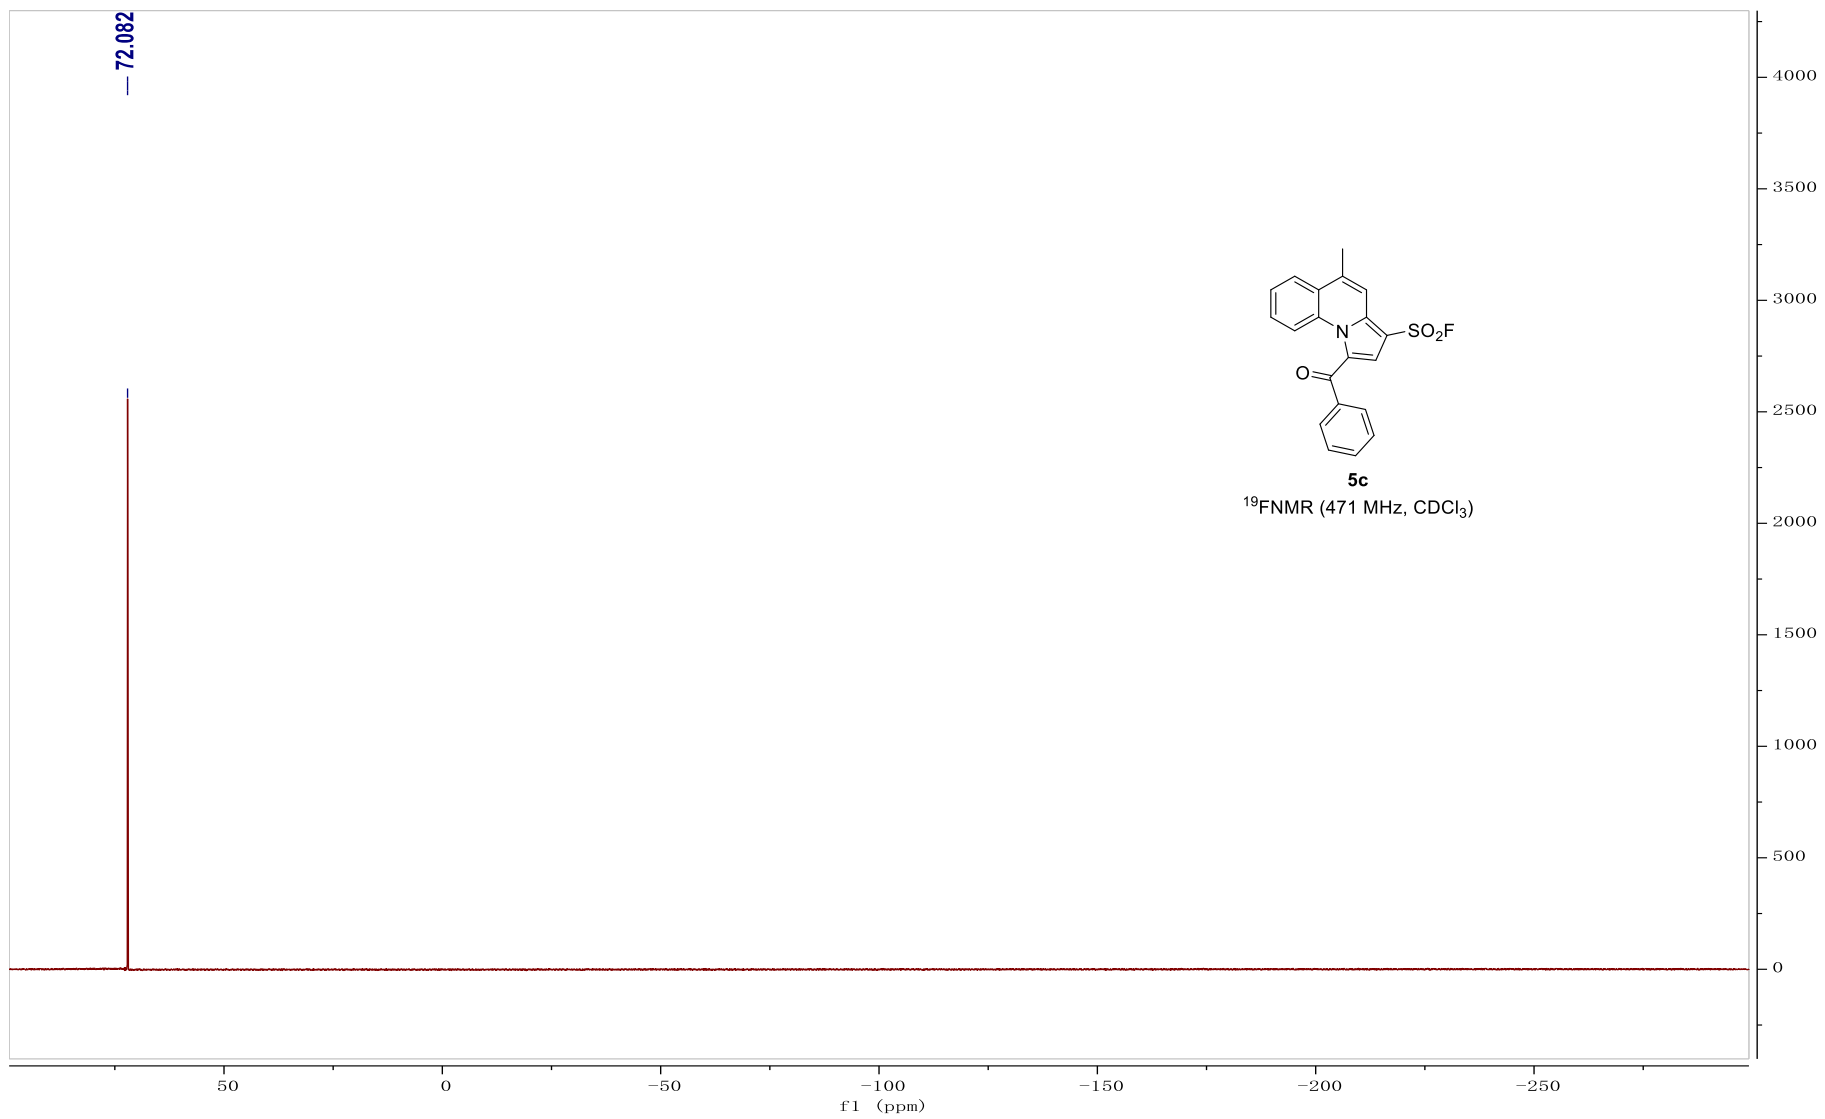

S150



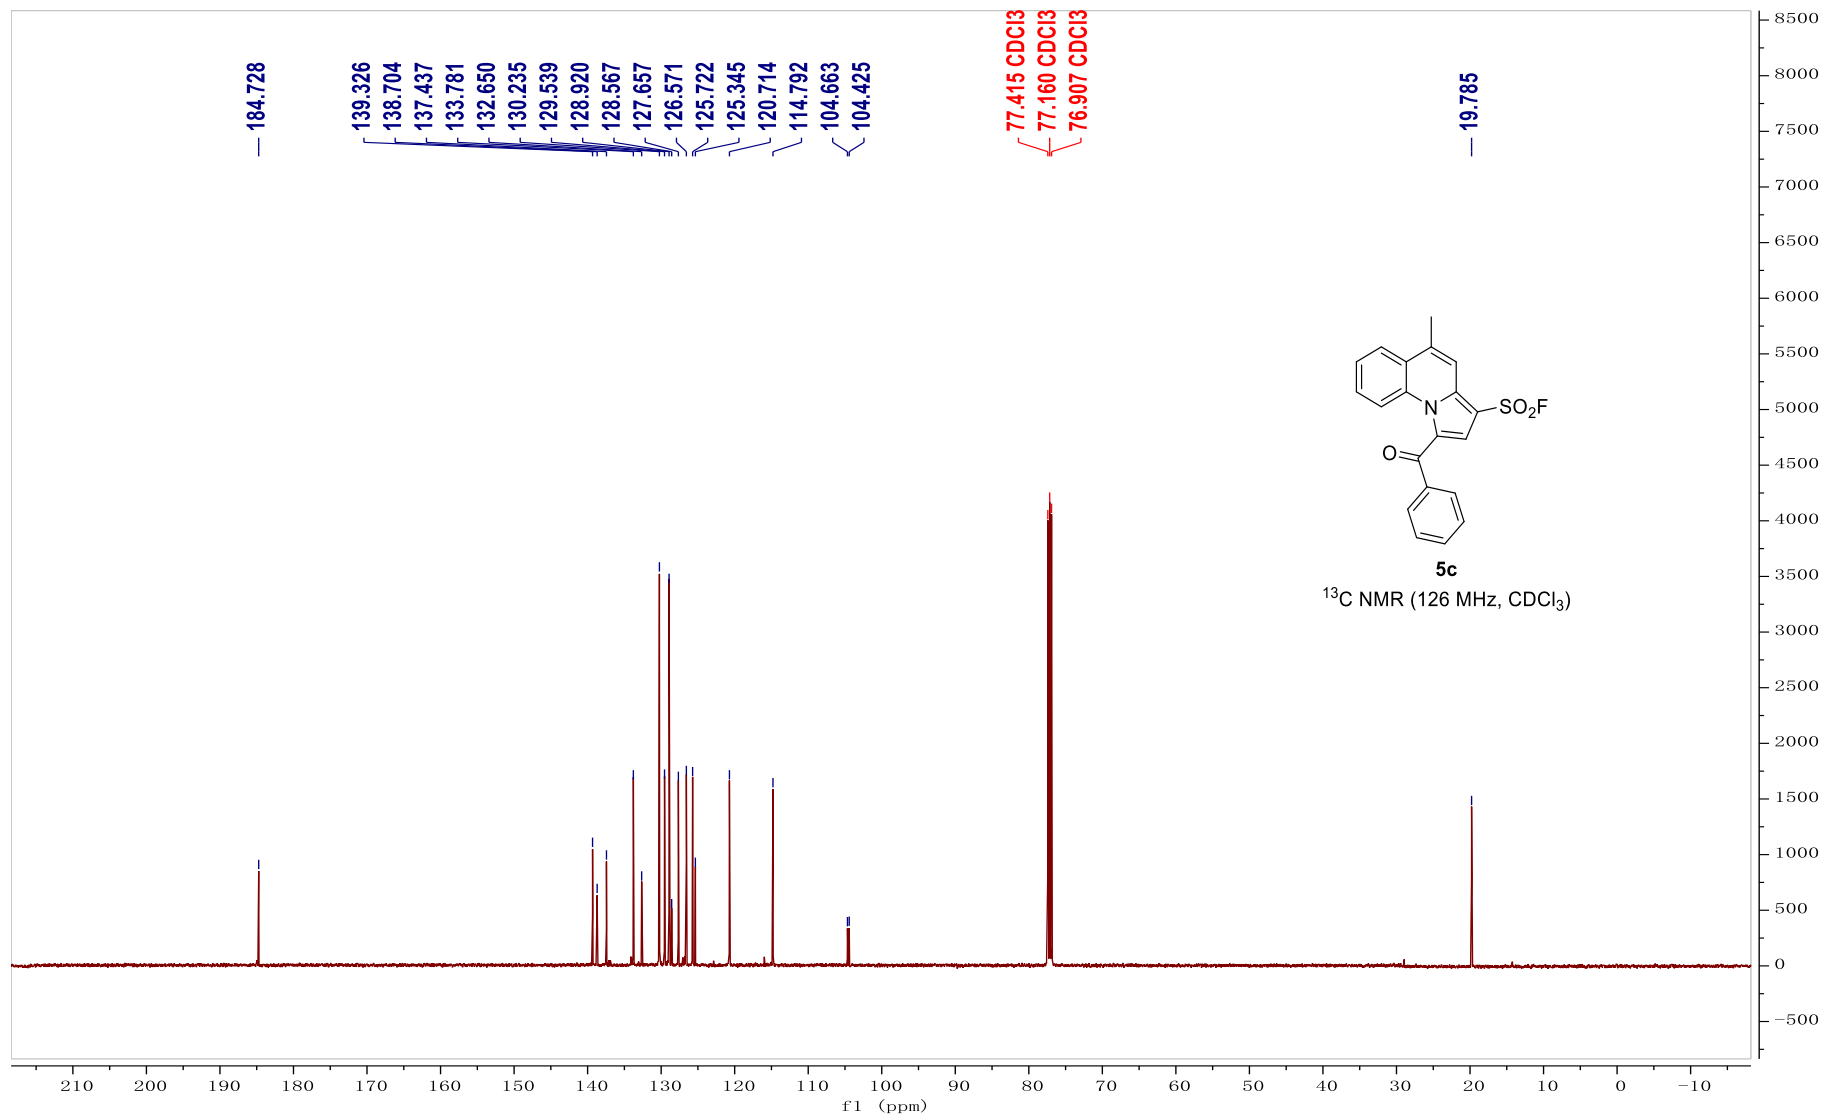

S151

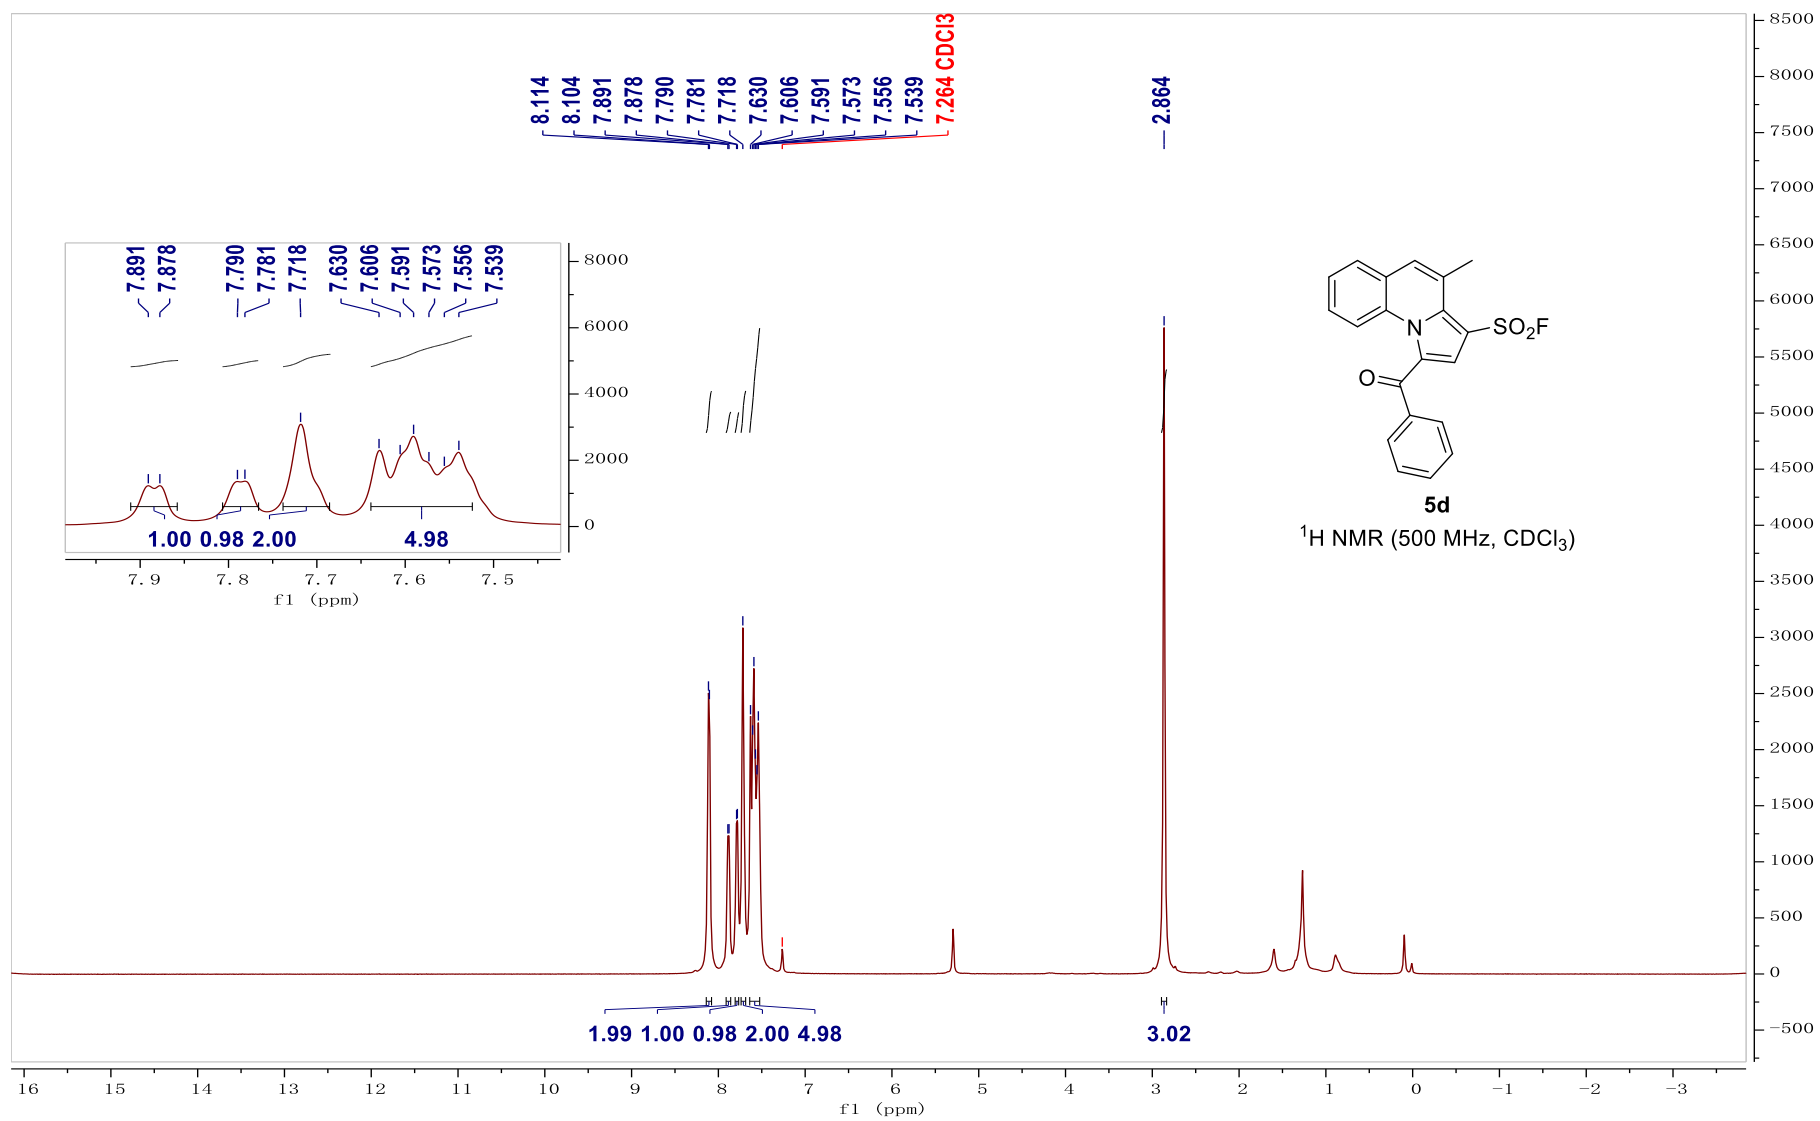

S152

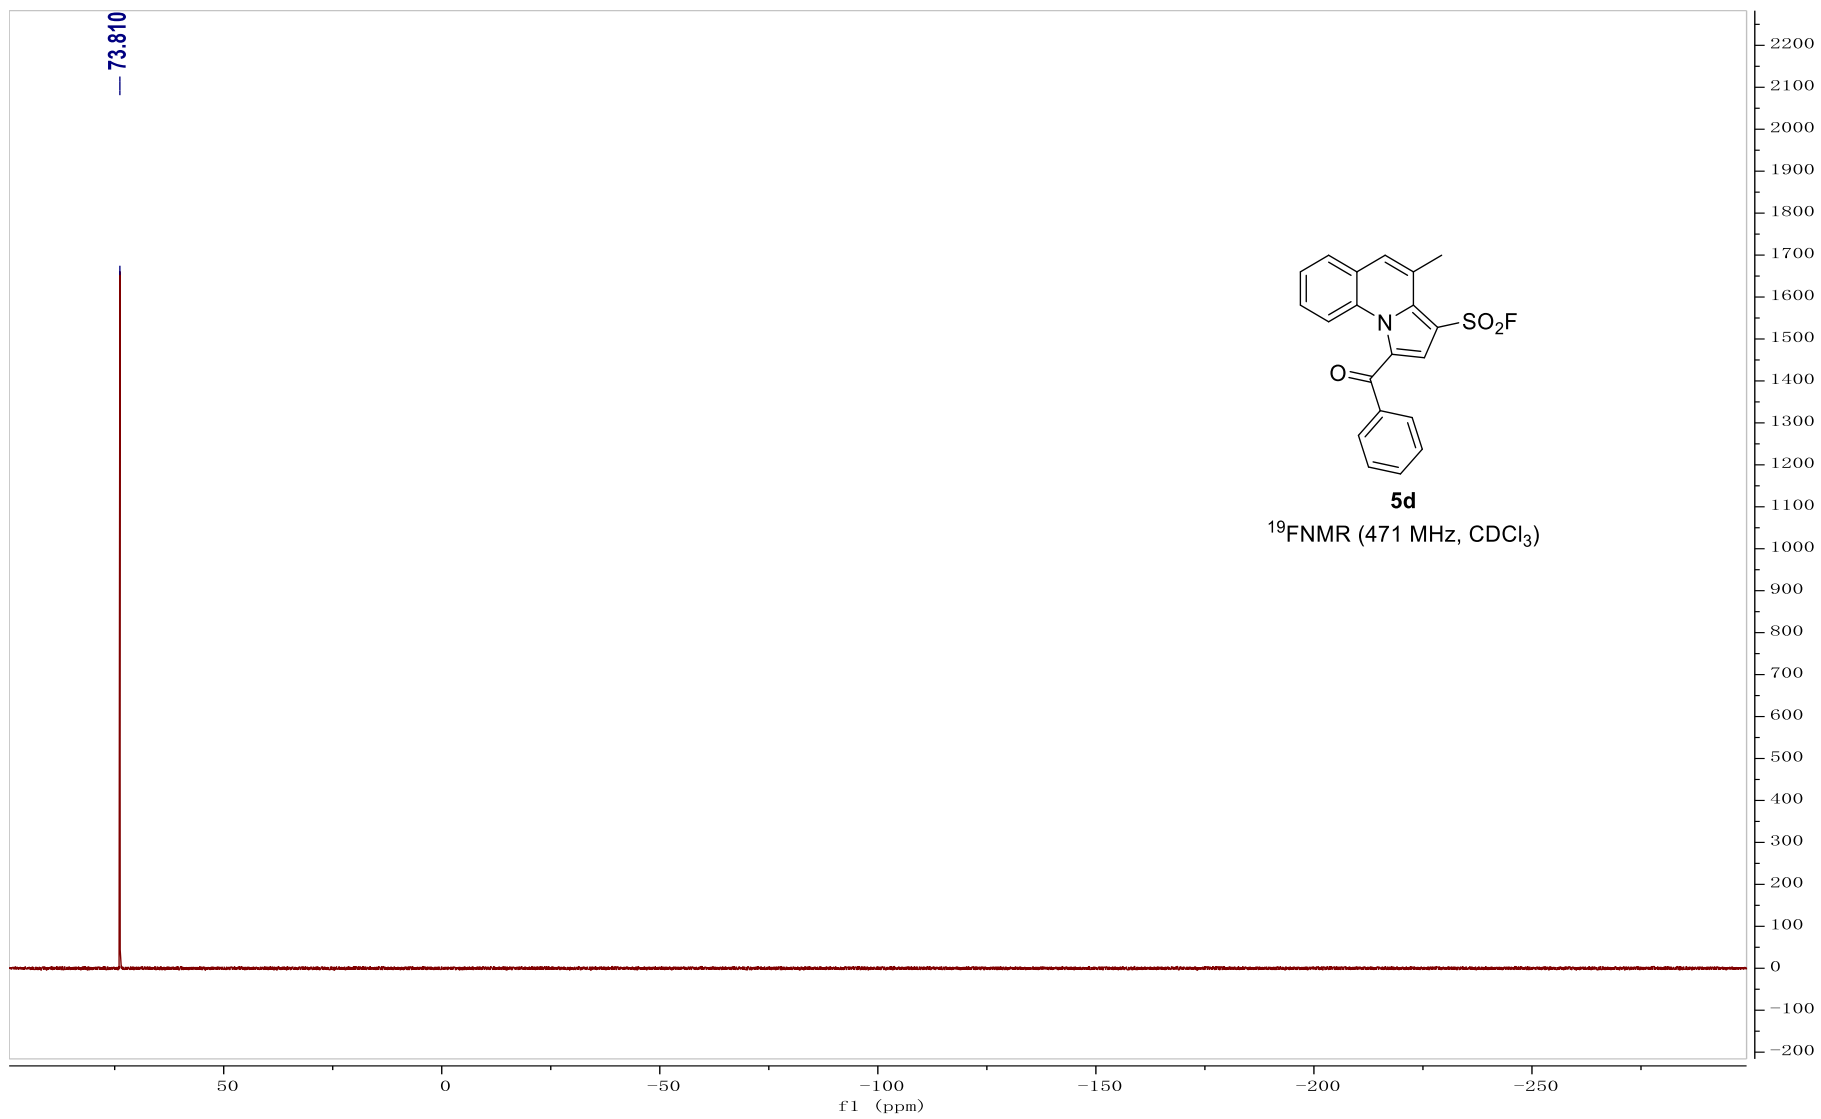

S153

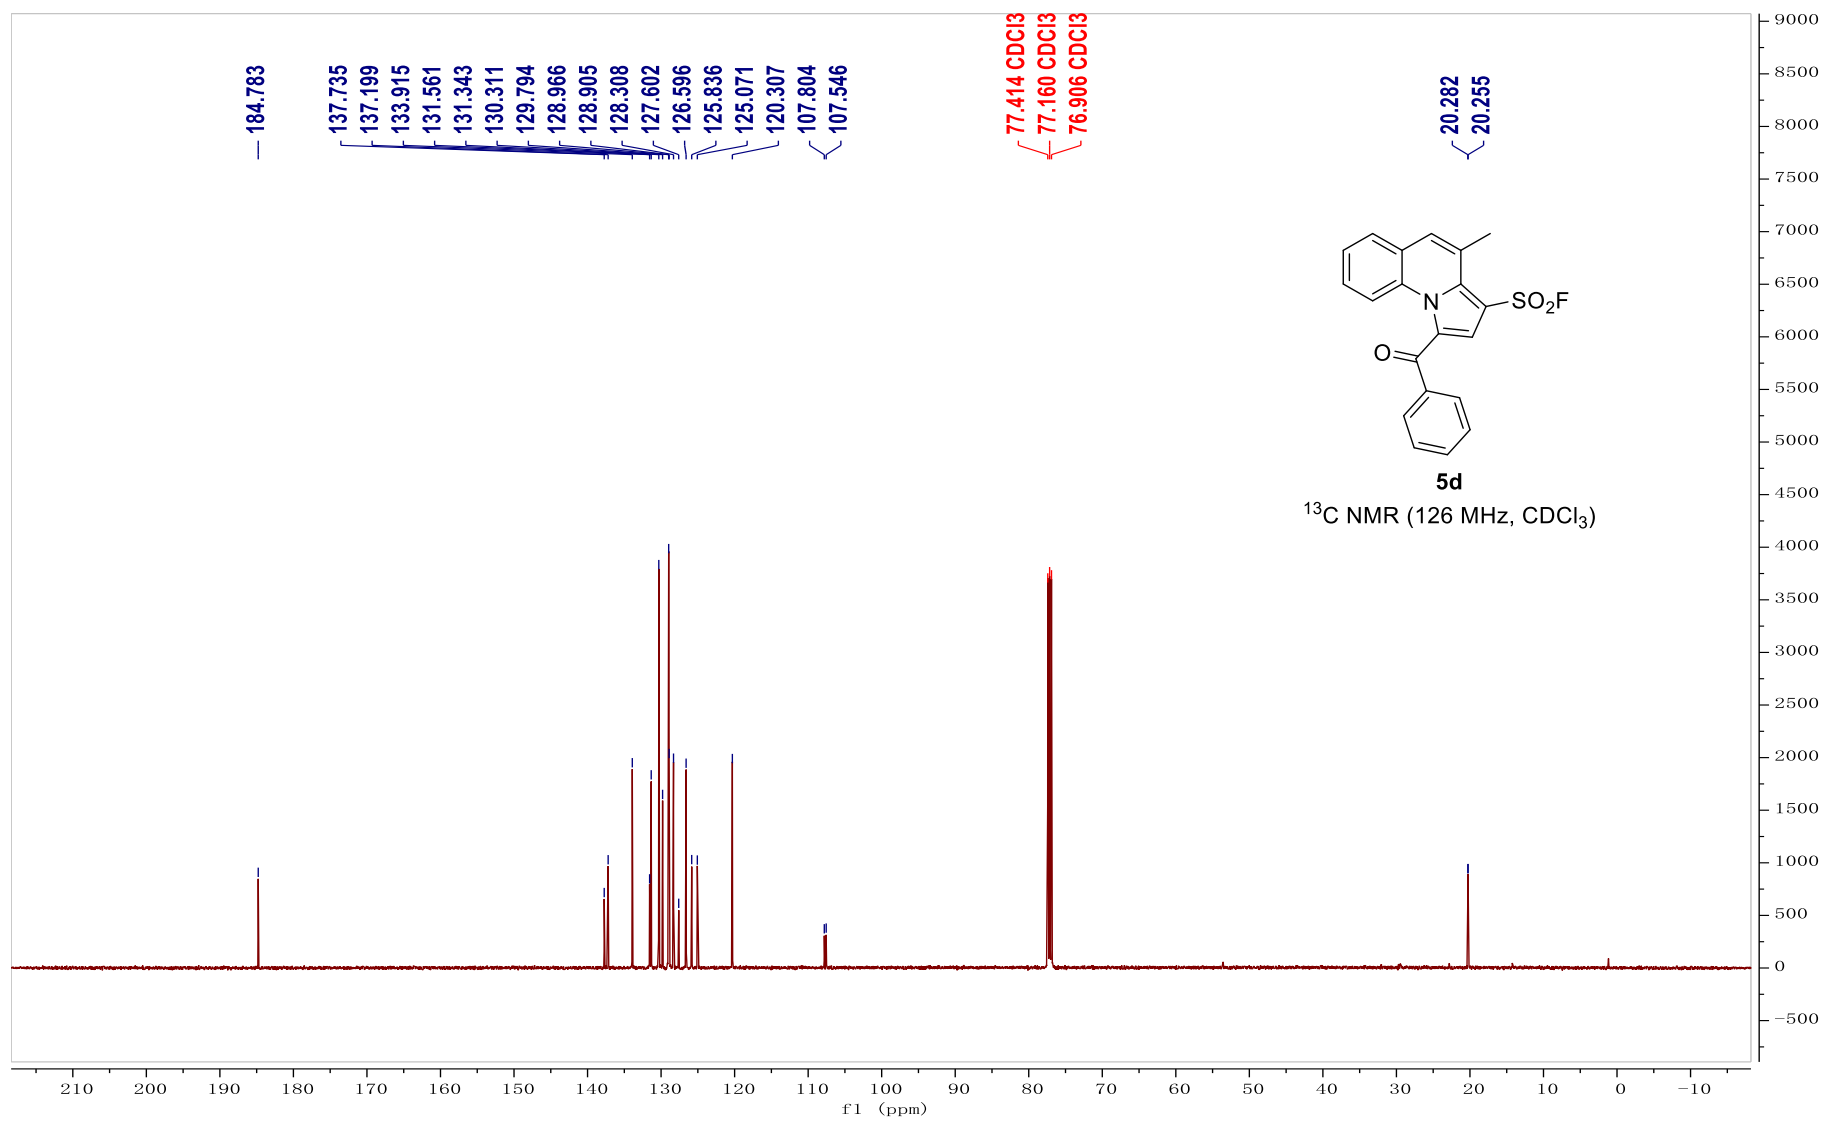

S154

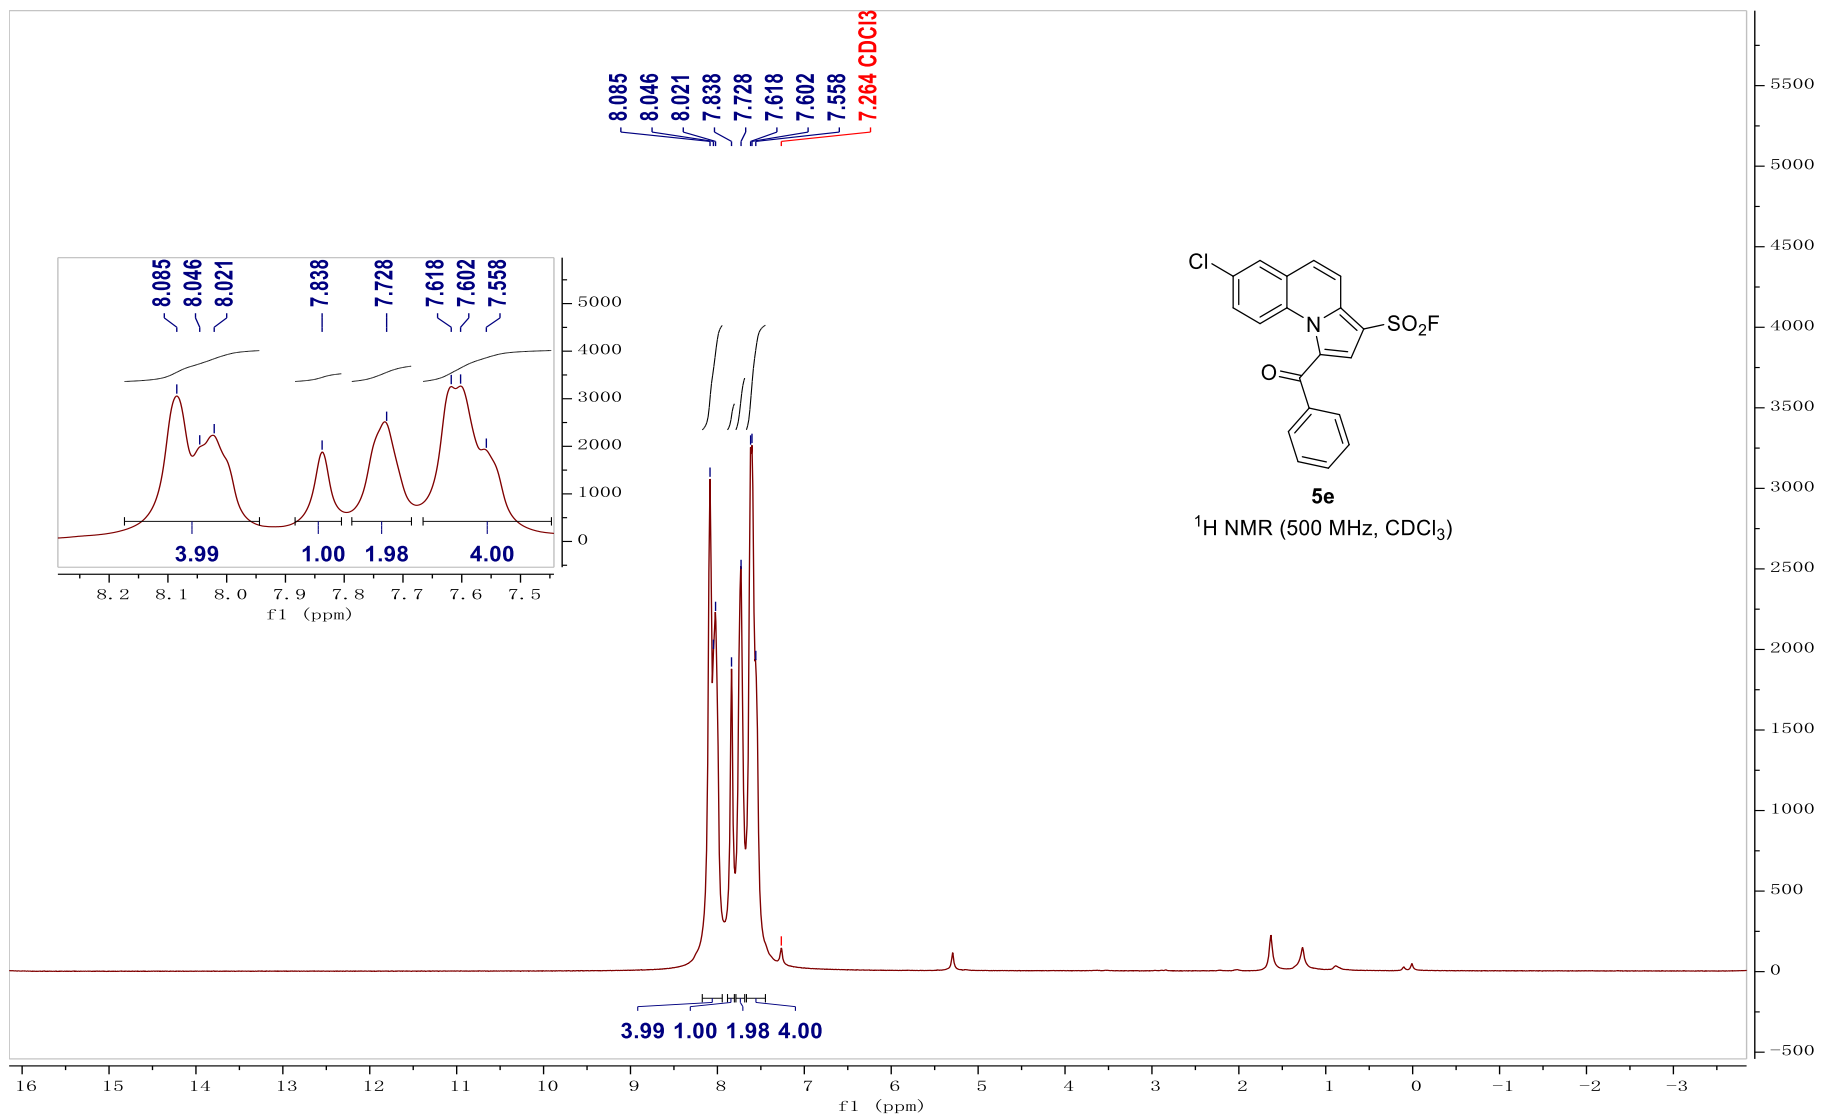

S155

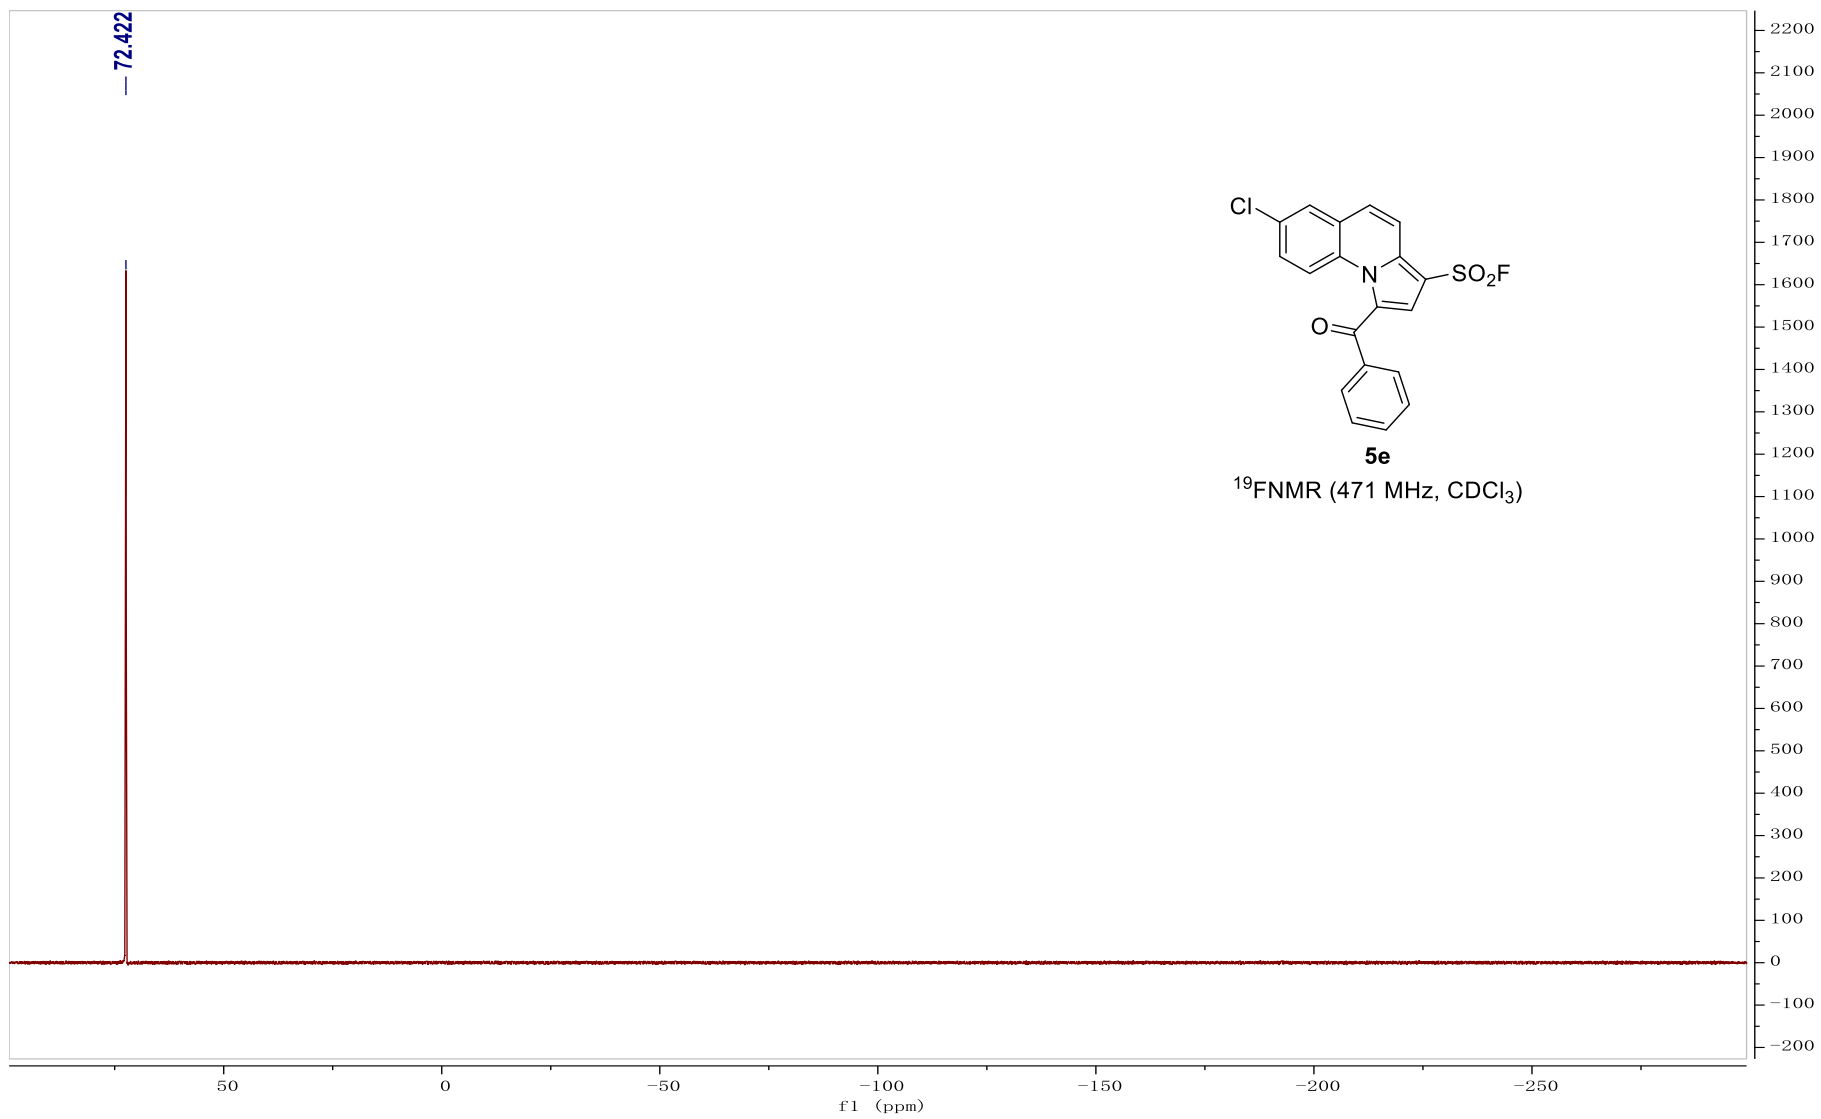

S156

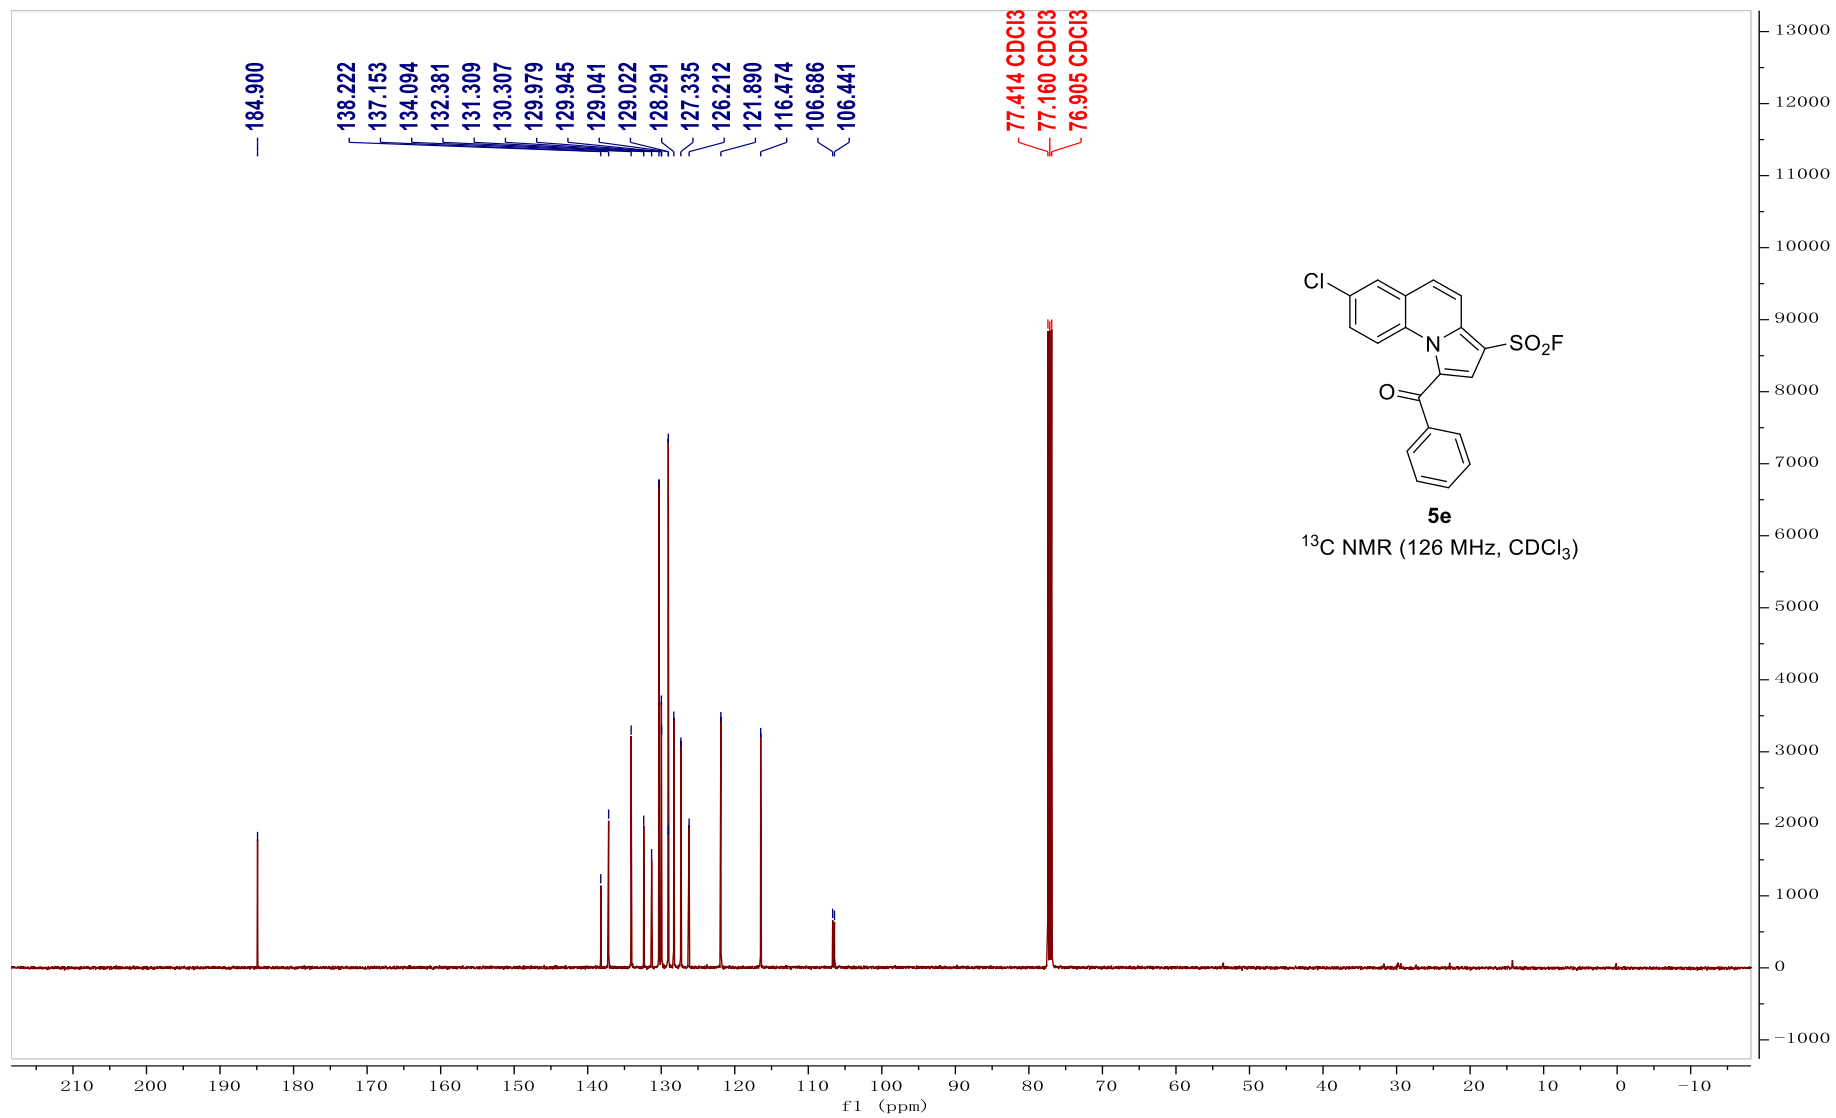

S157

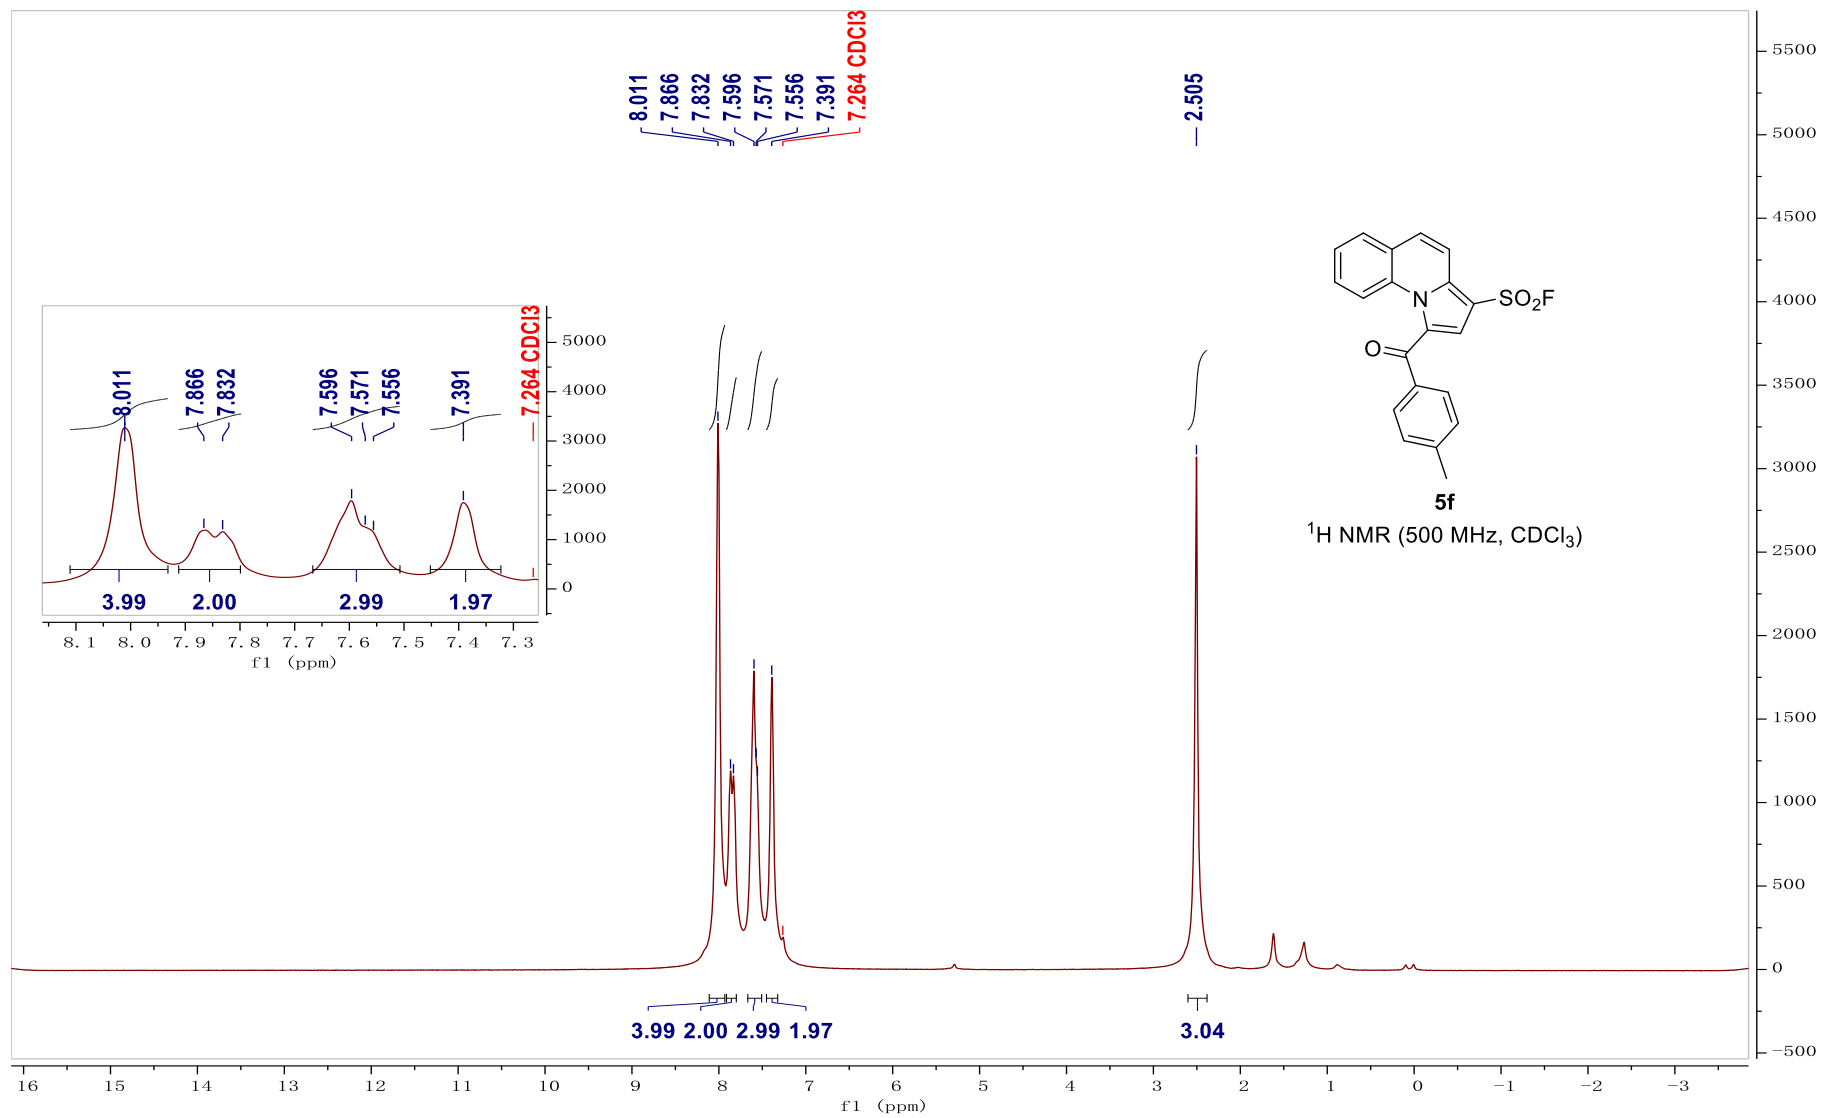

S158



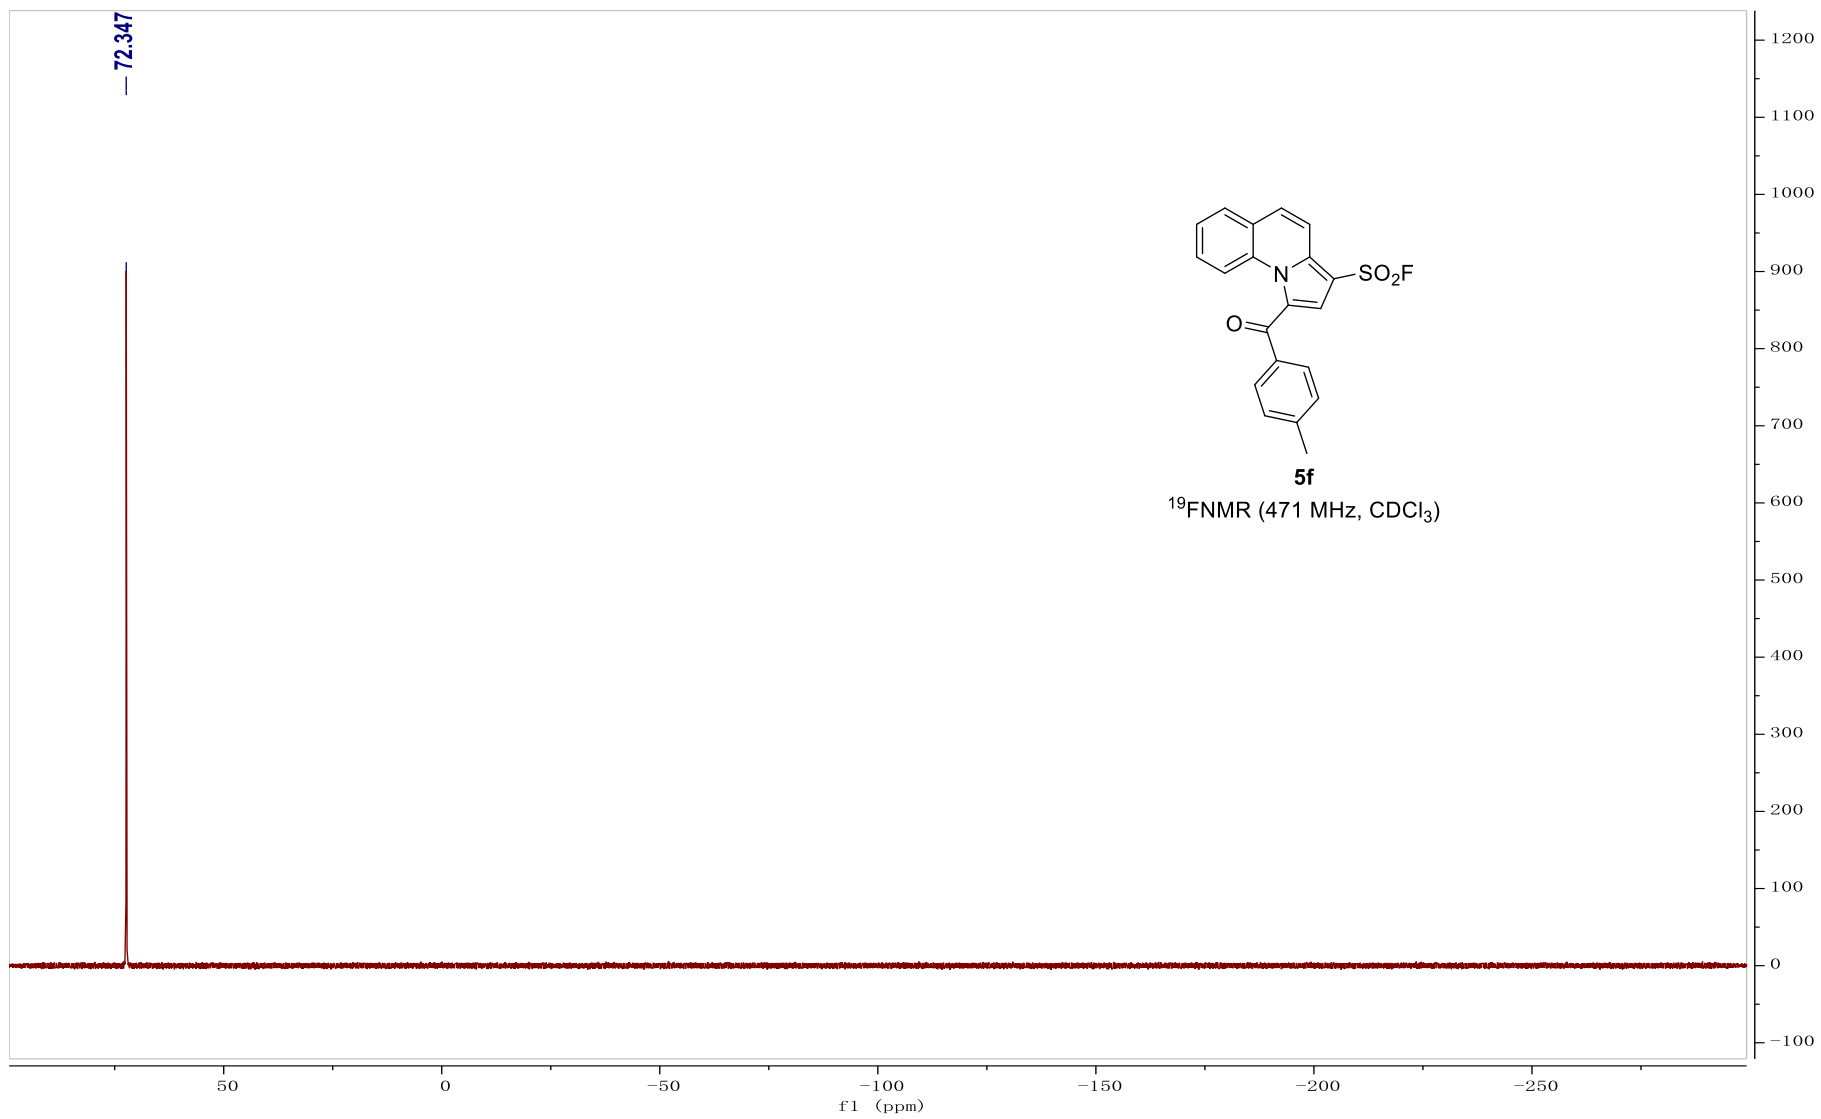

S159

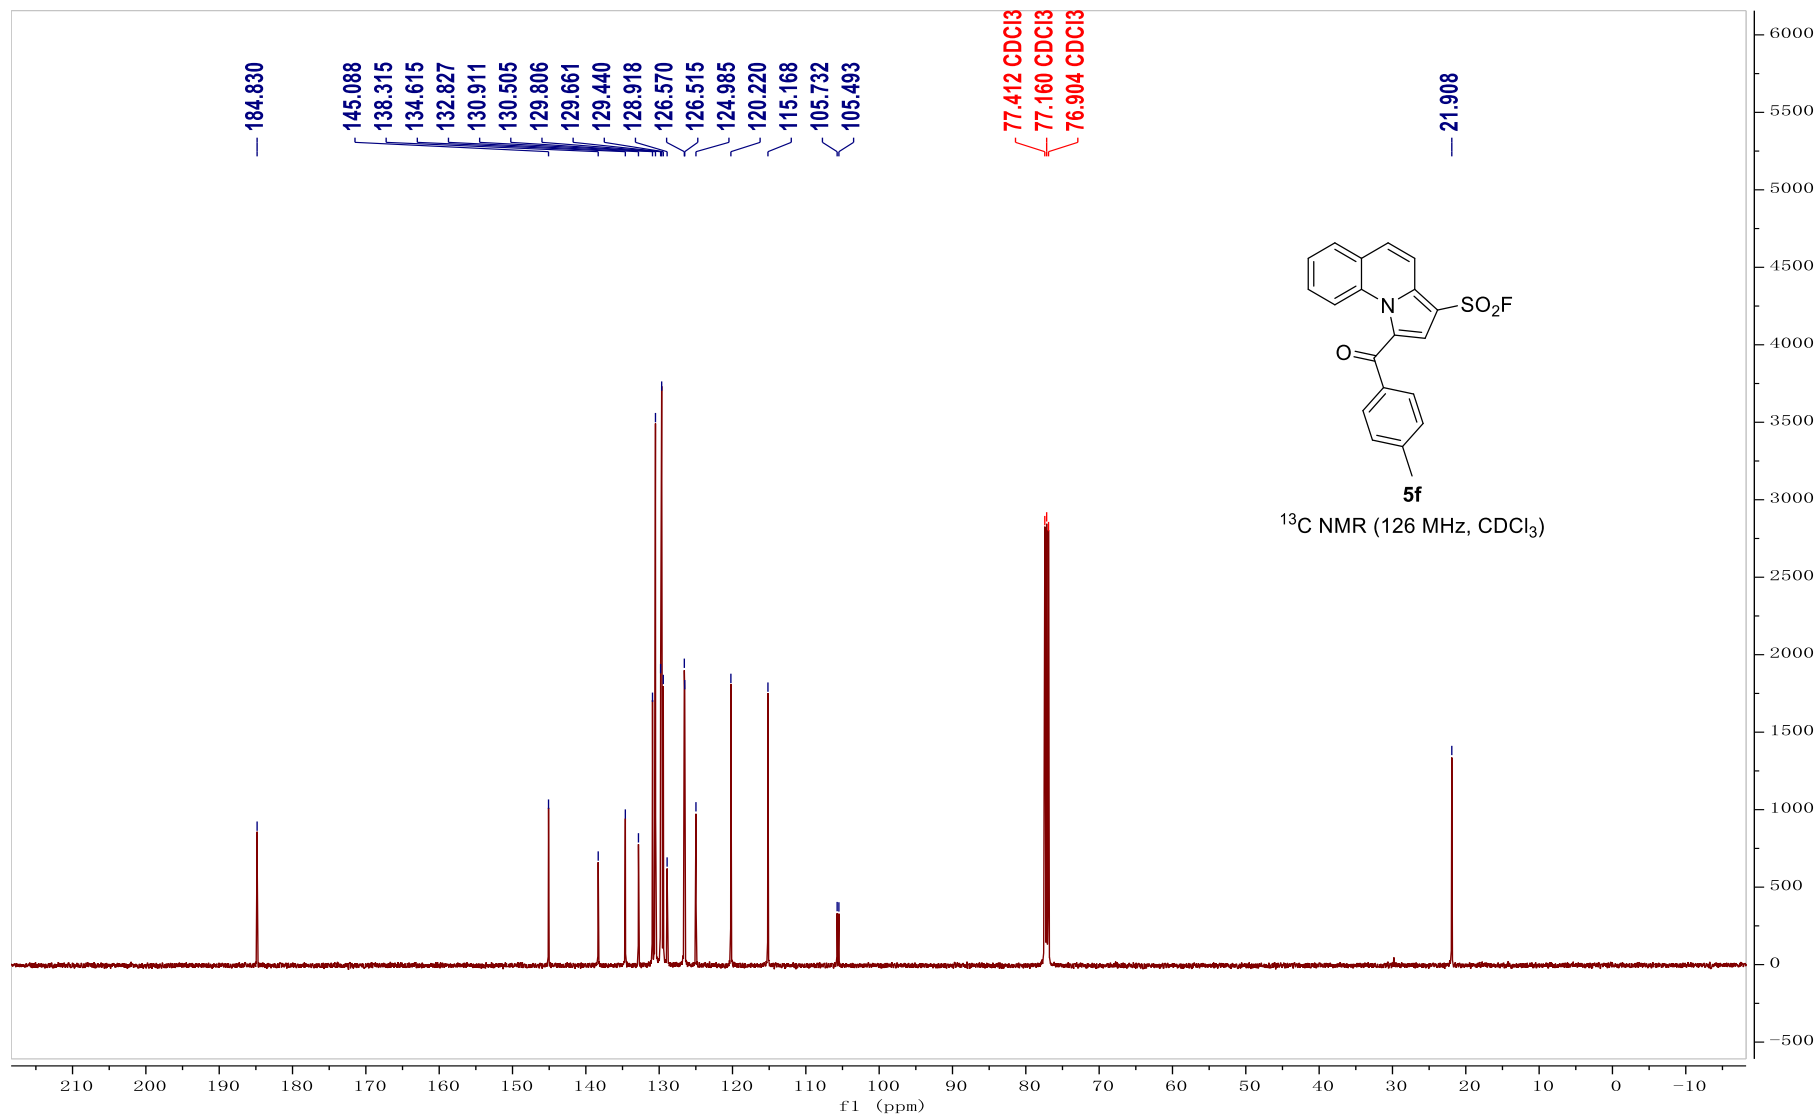

S160

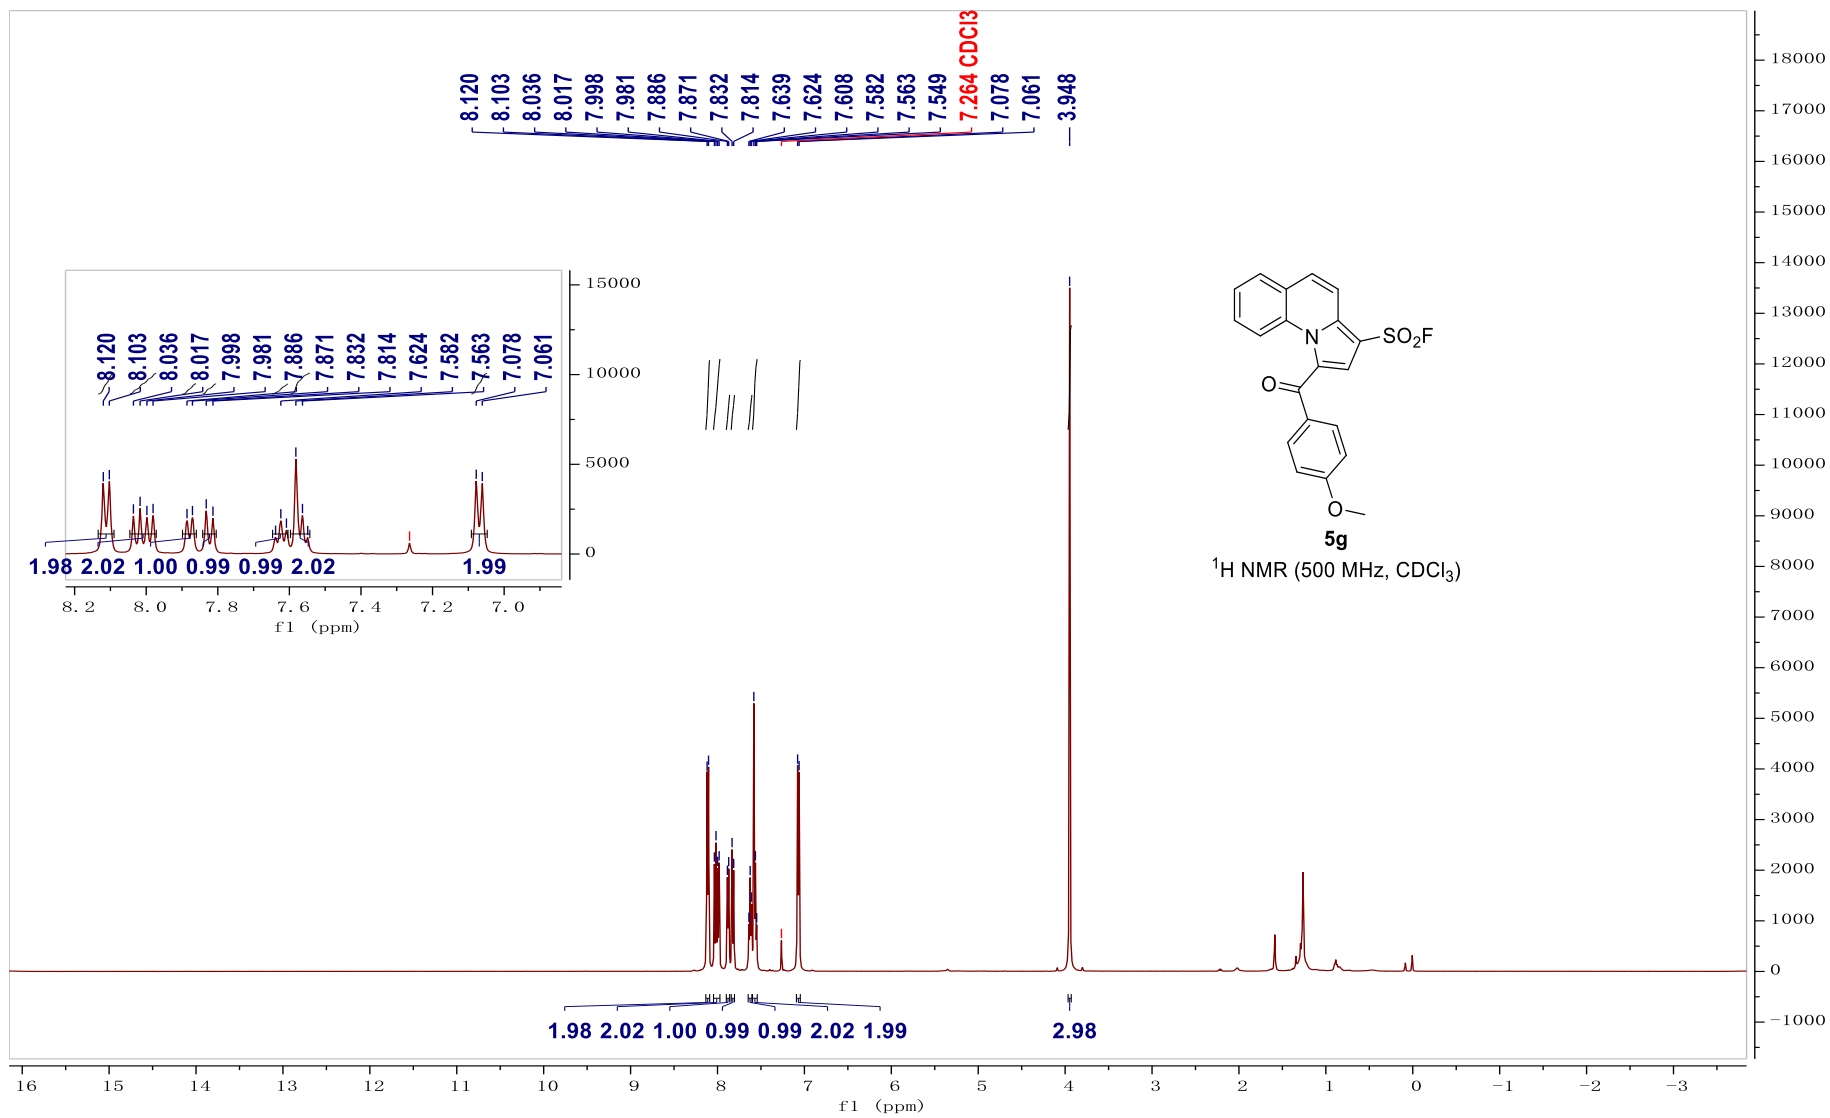

S161

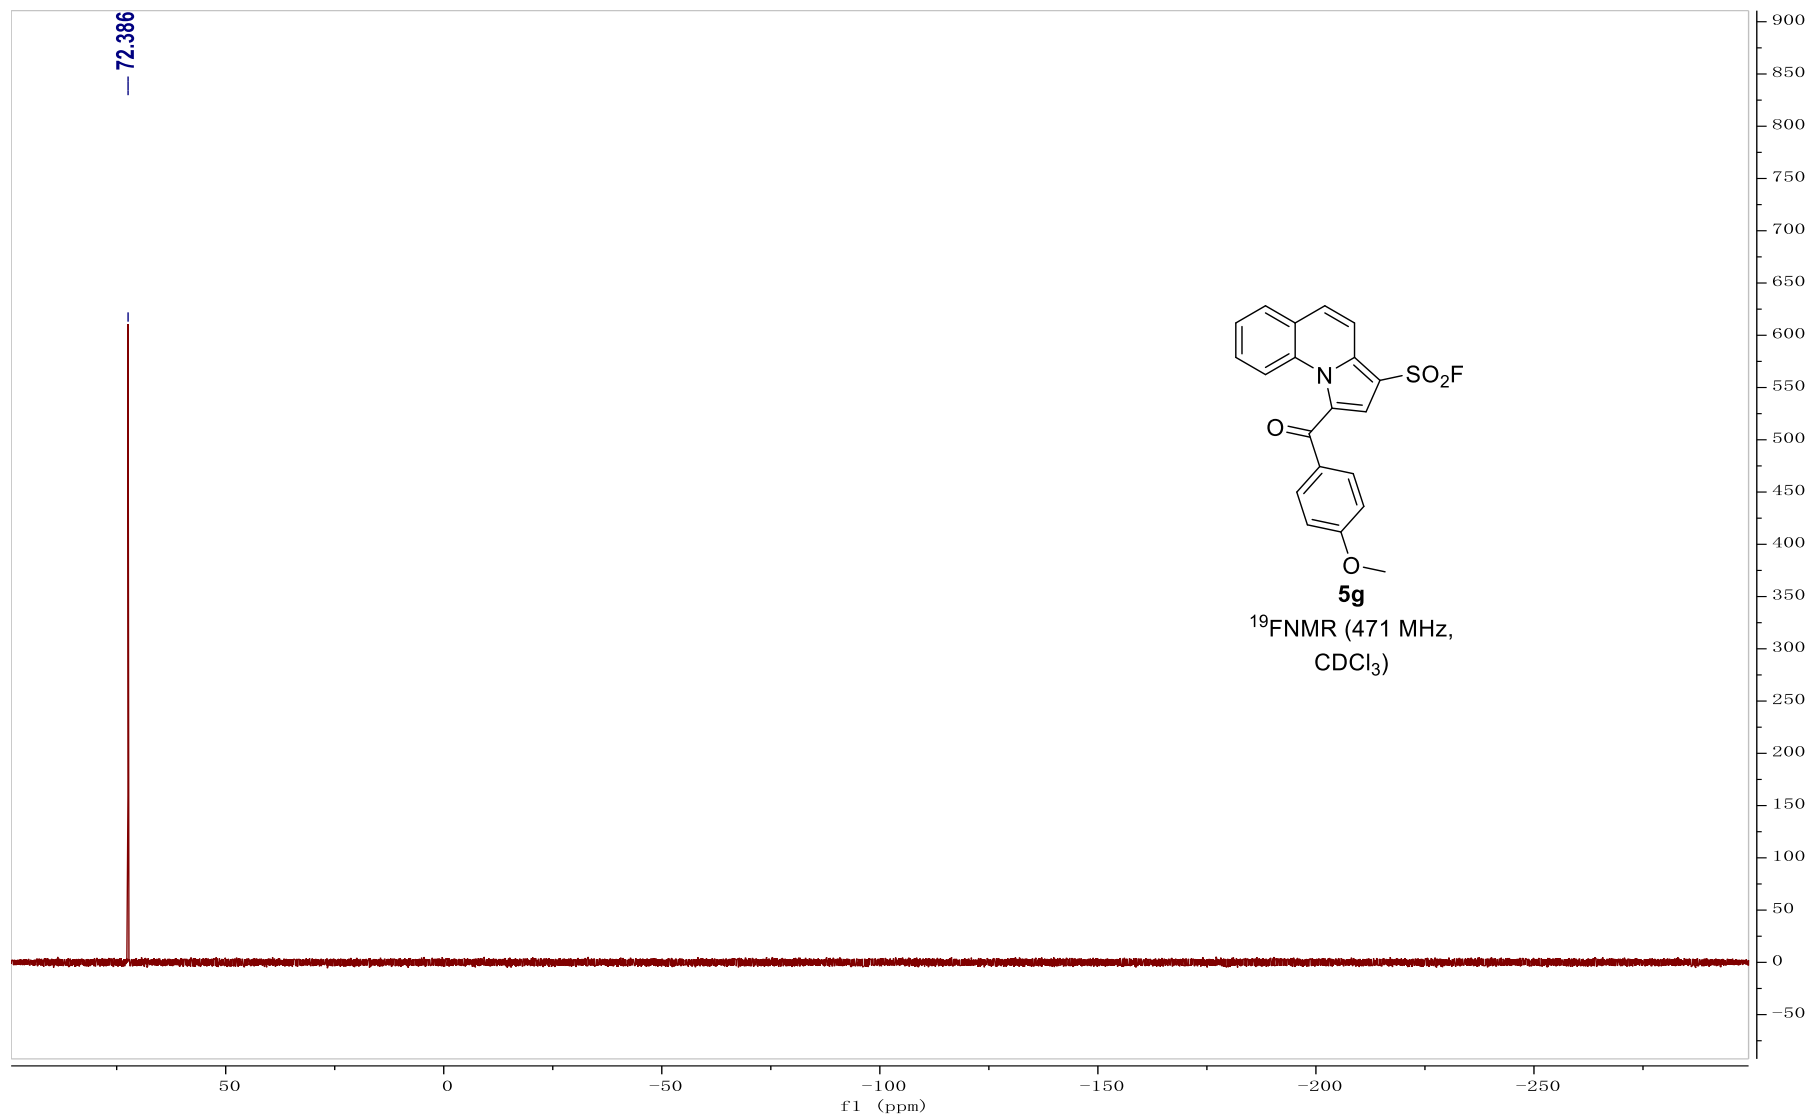

S162

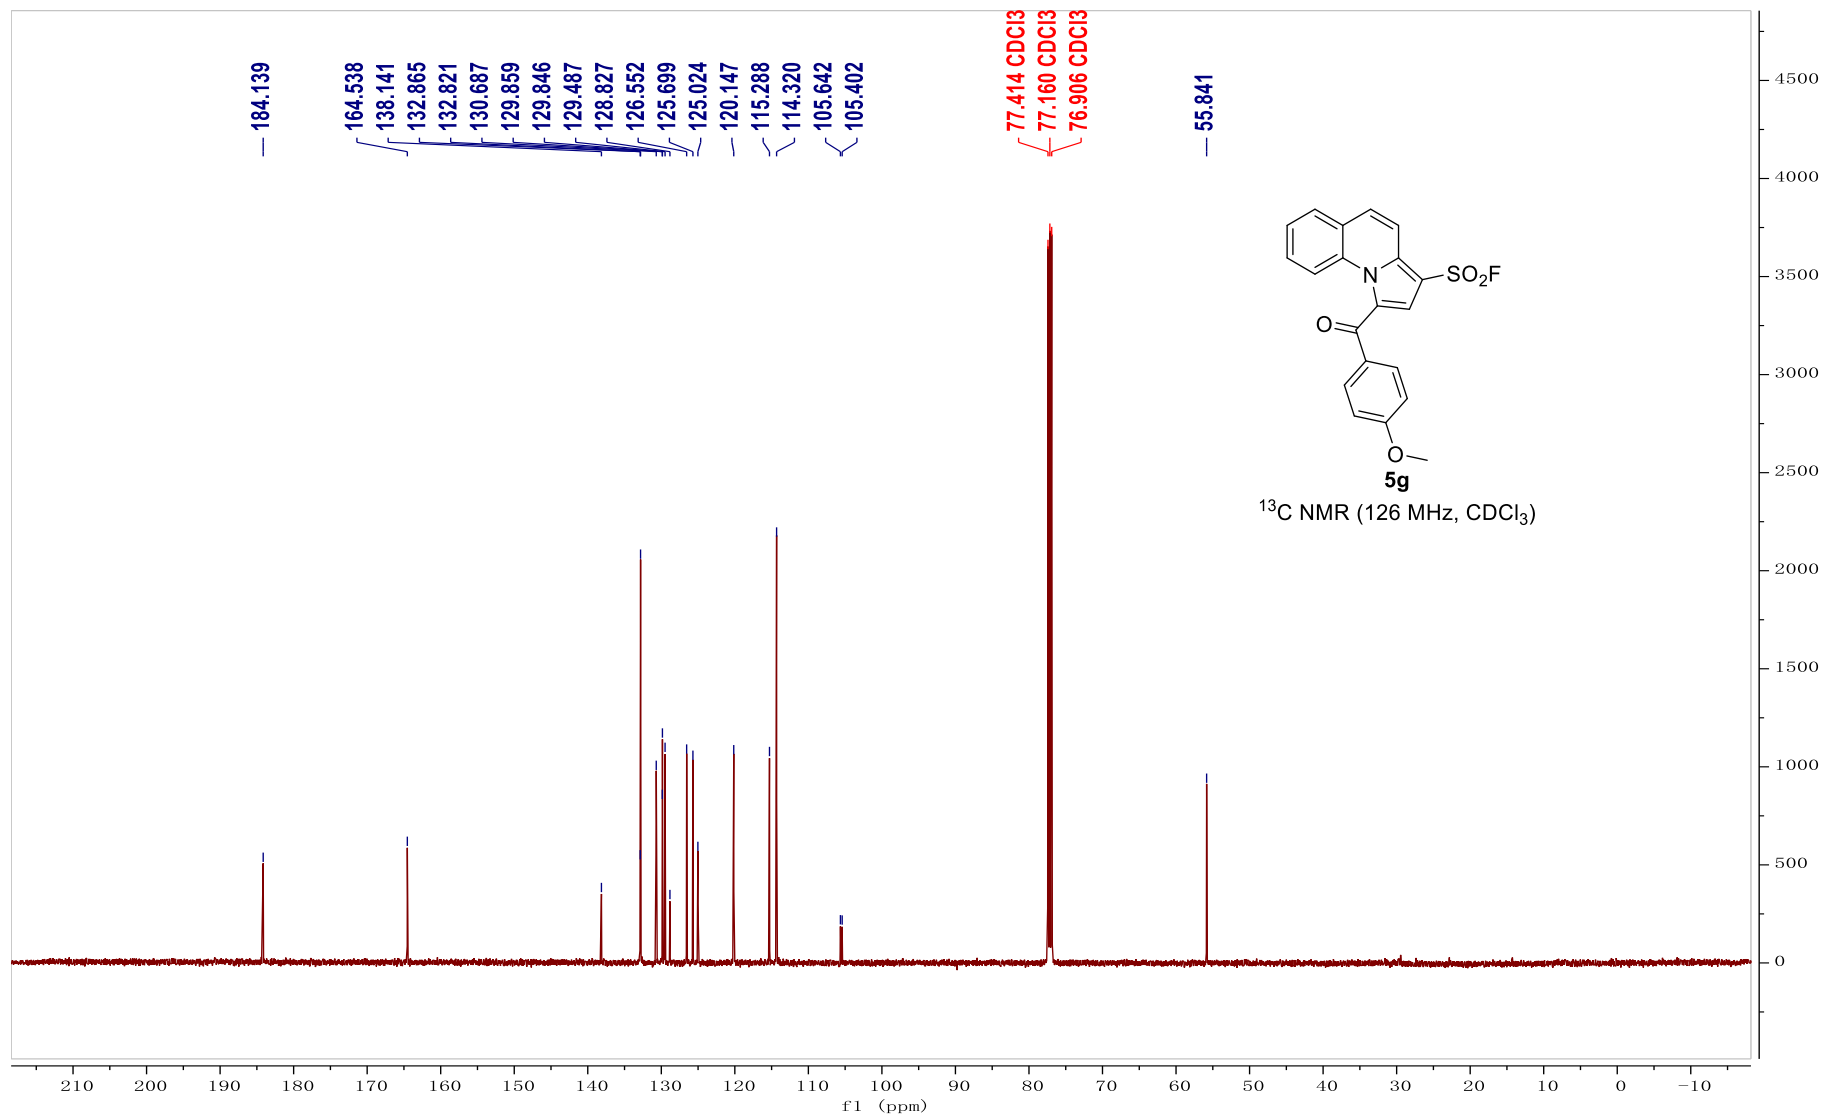

S163

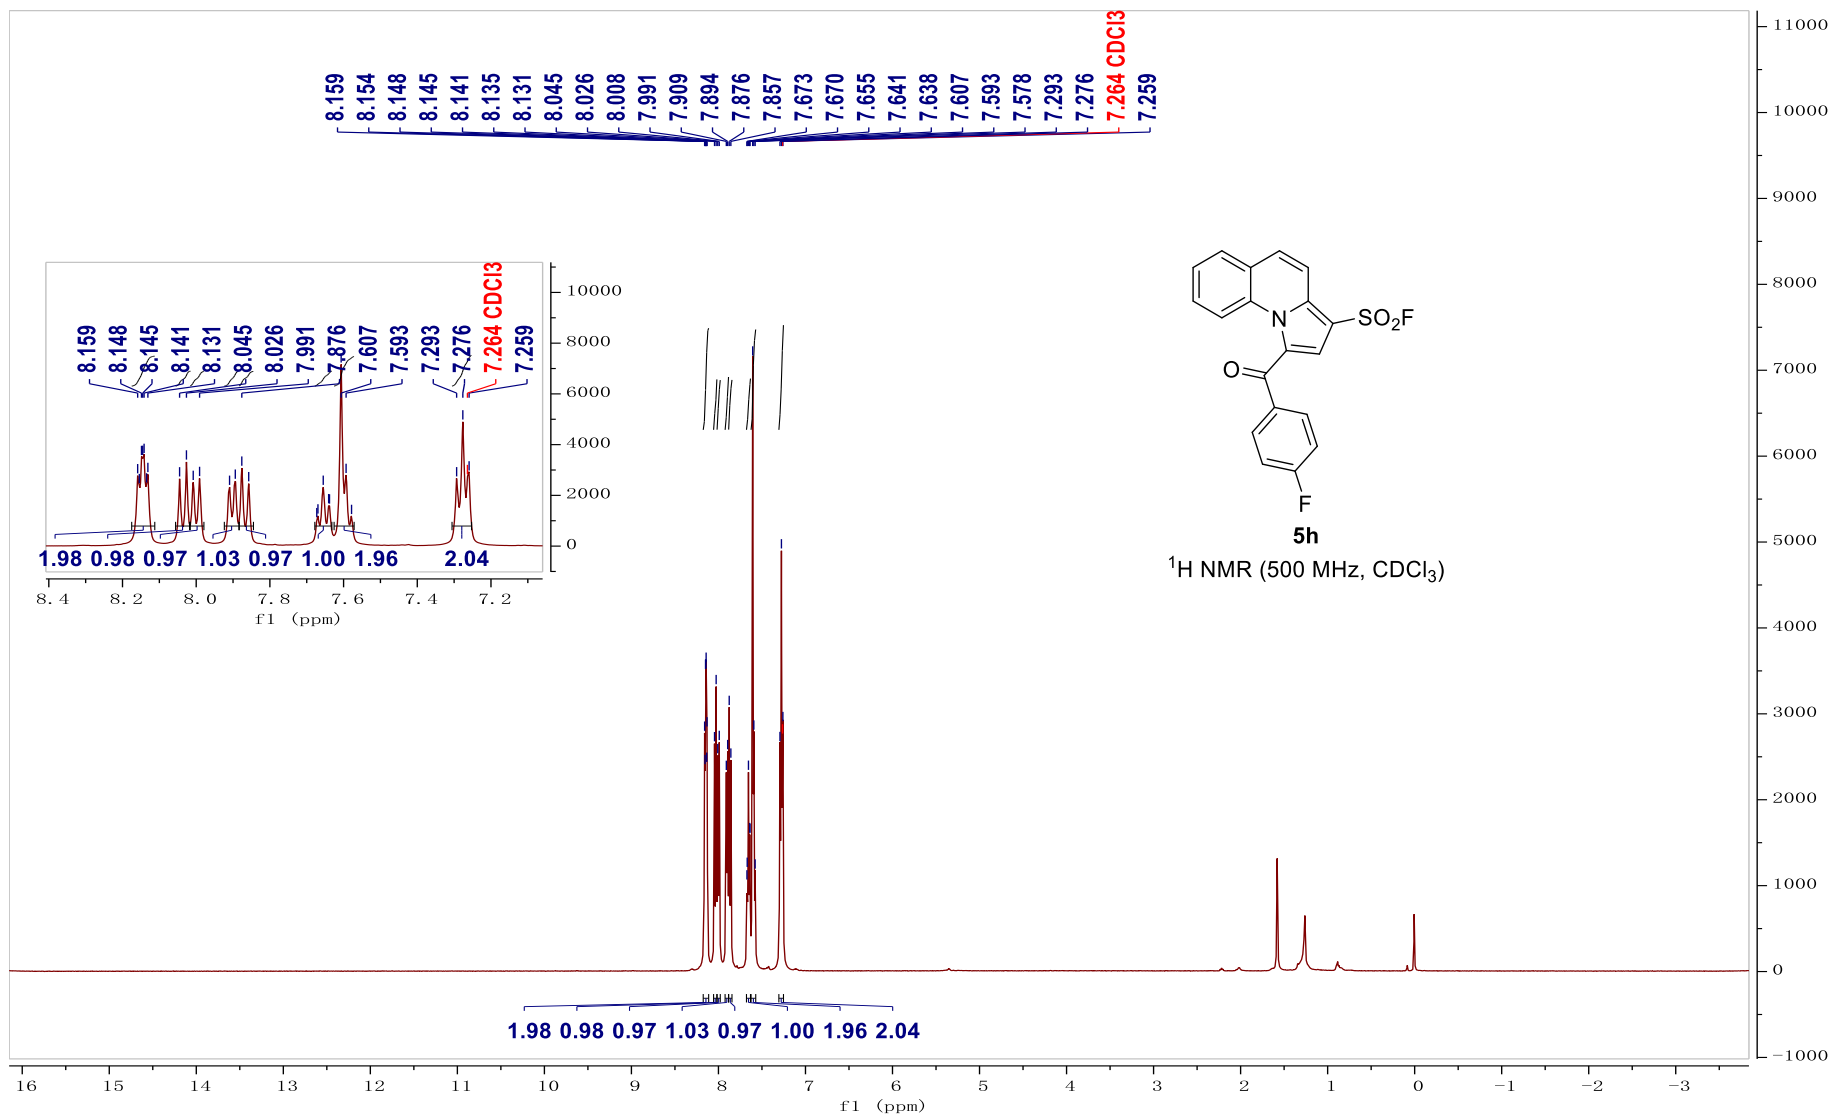

S164

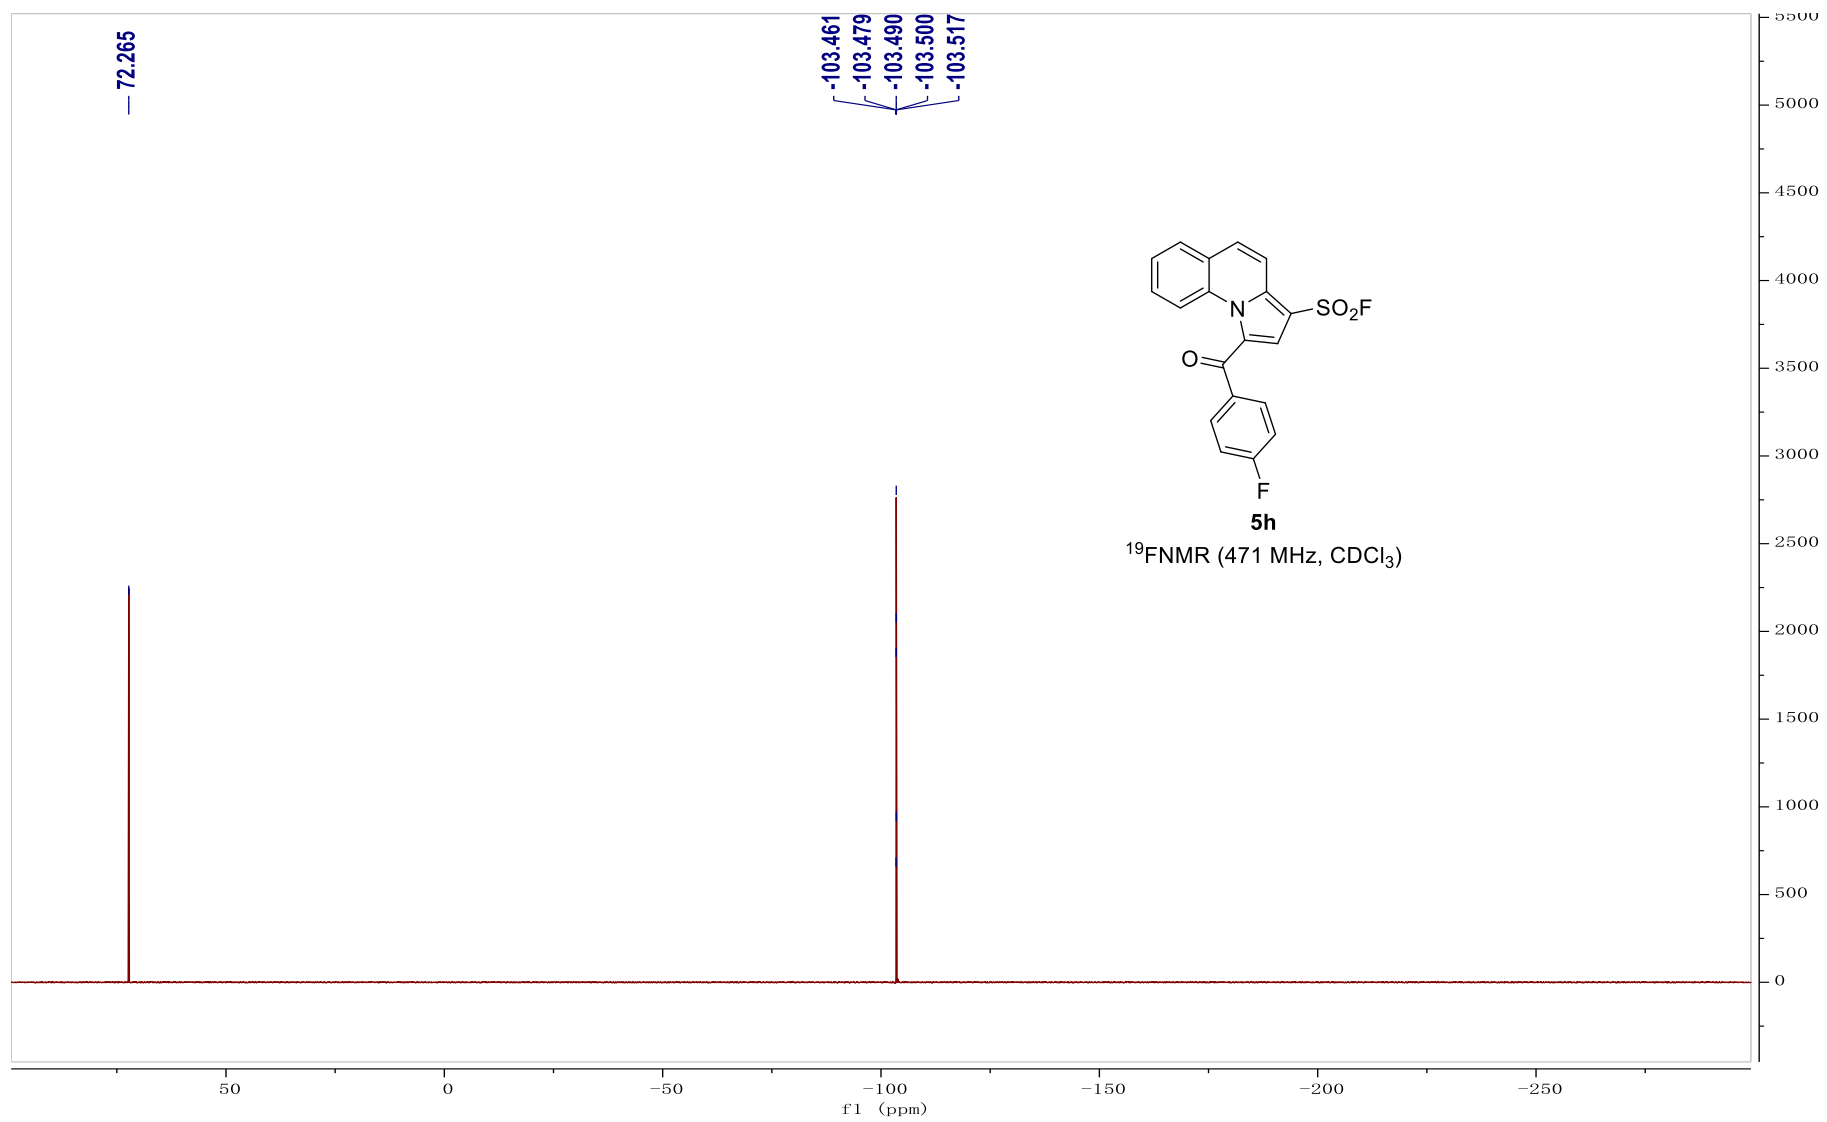

**S165**

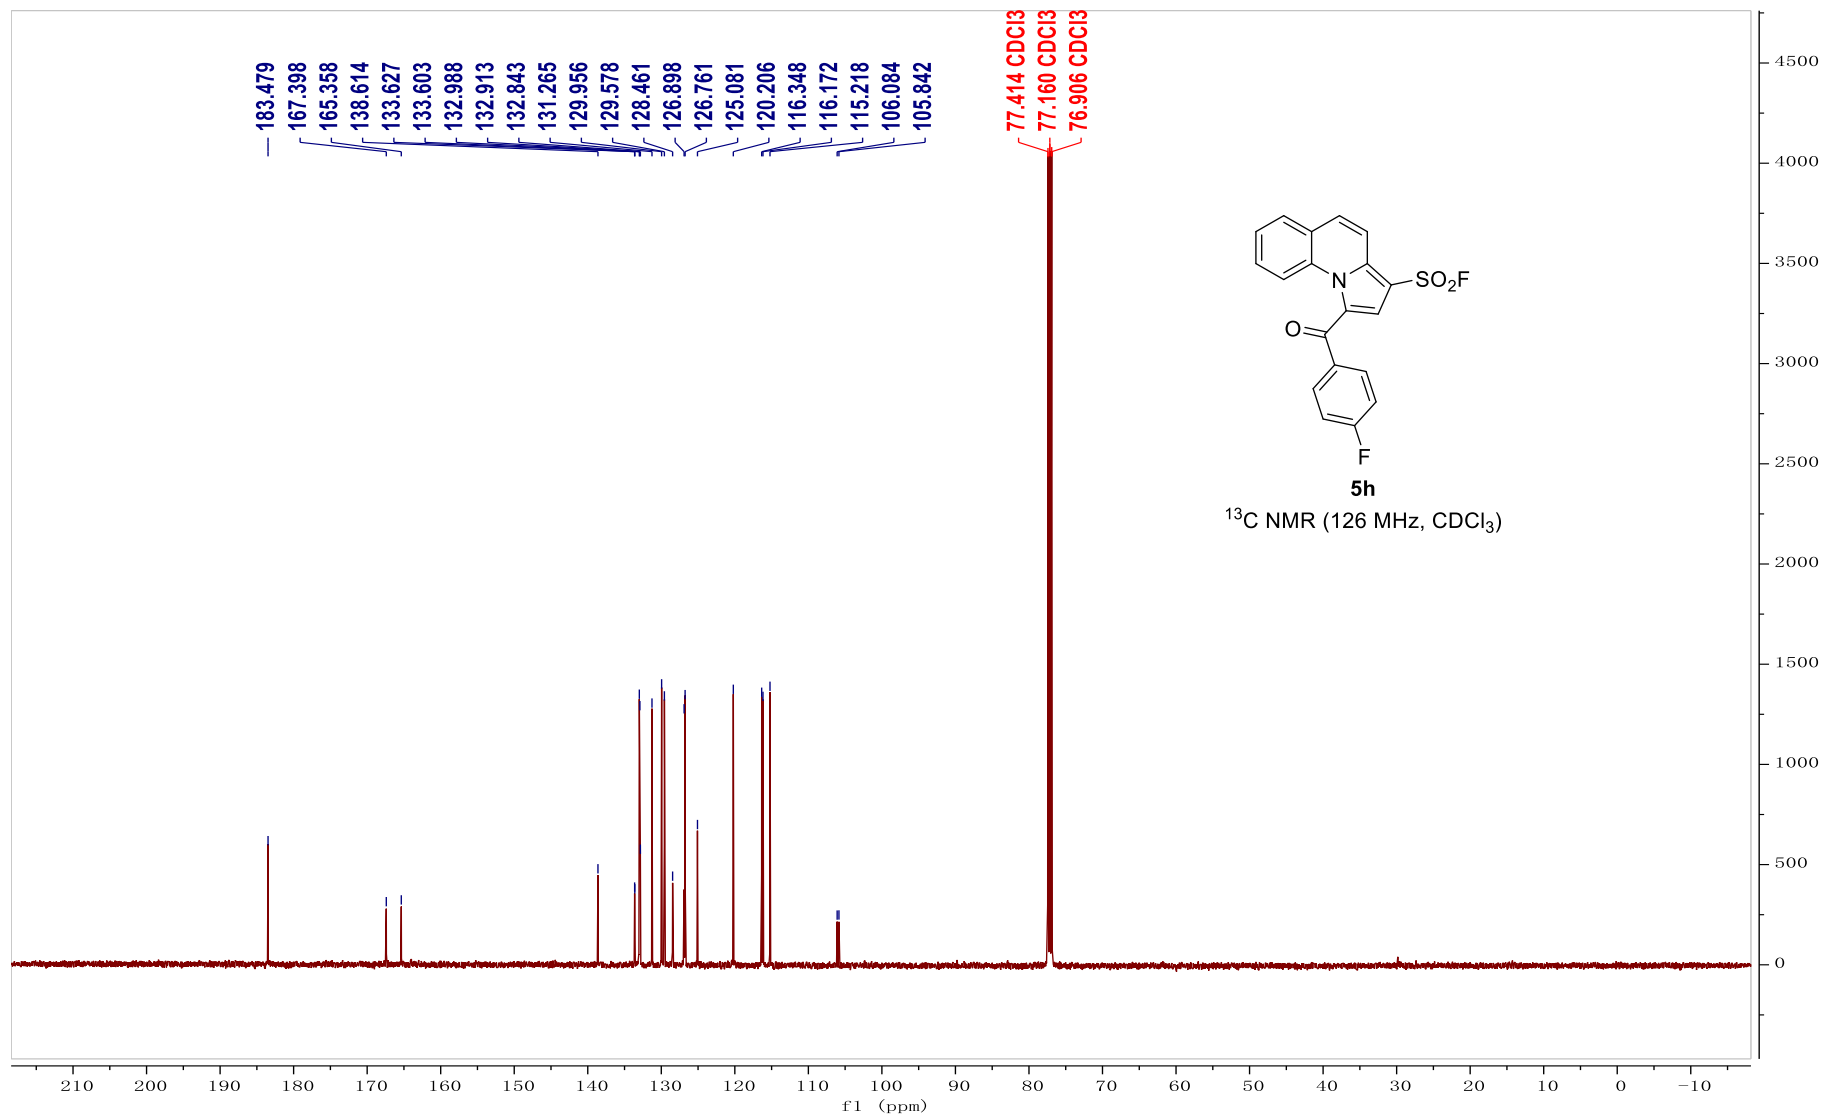

S166



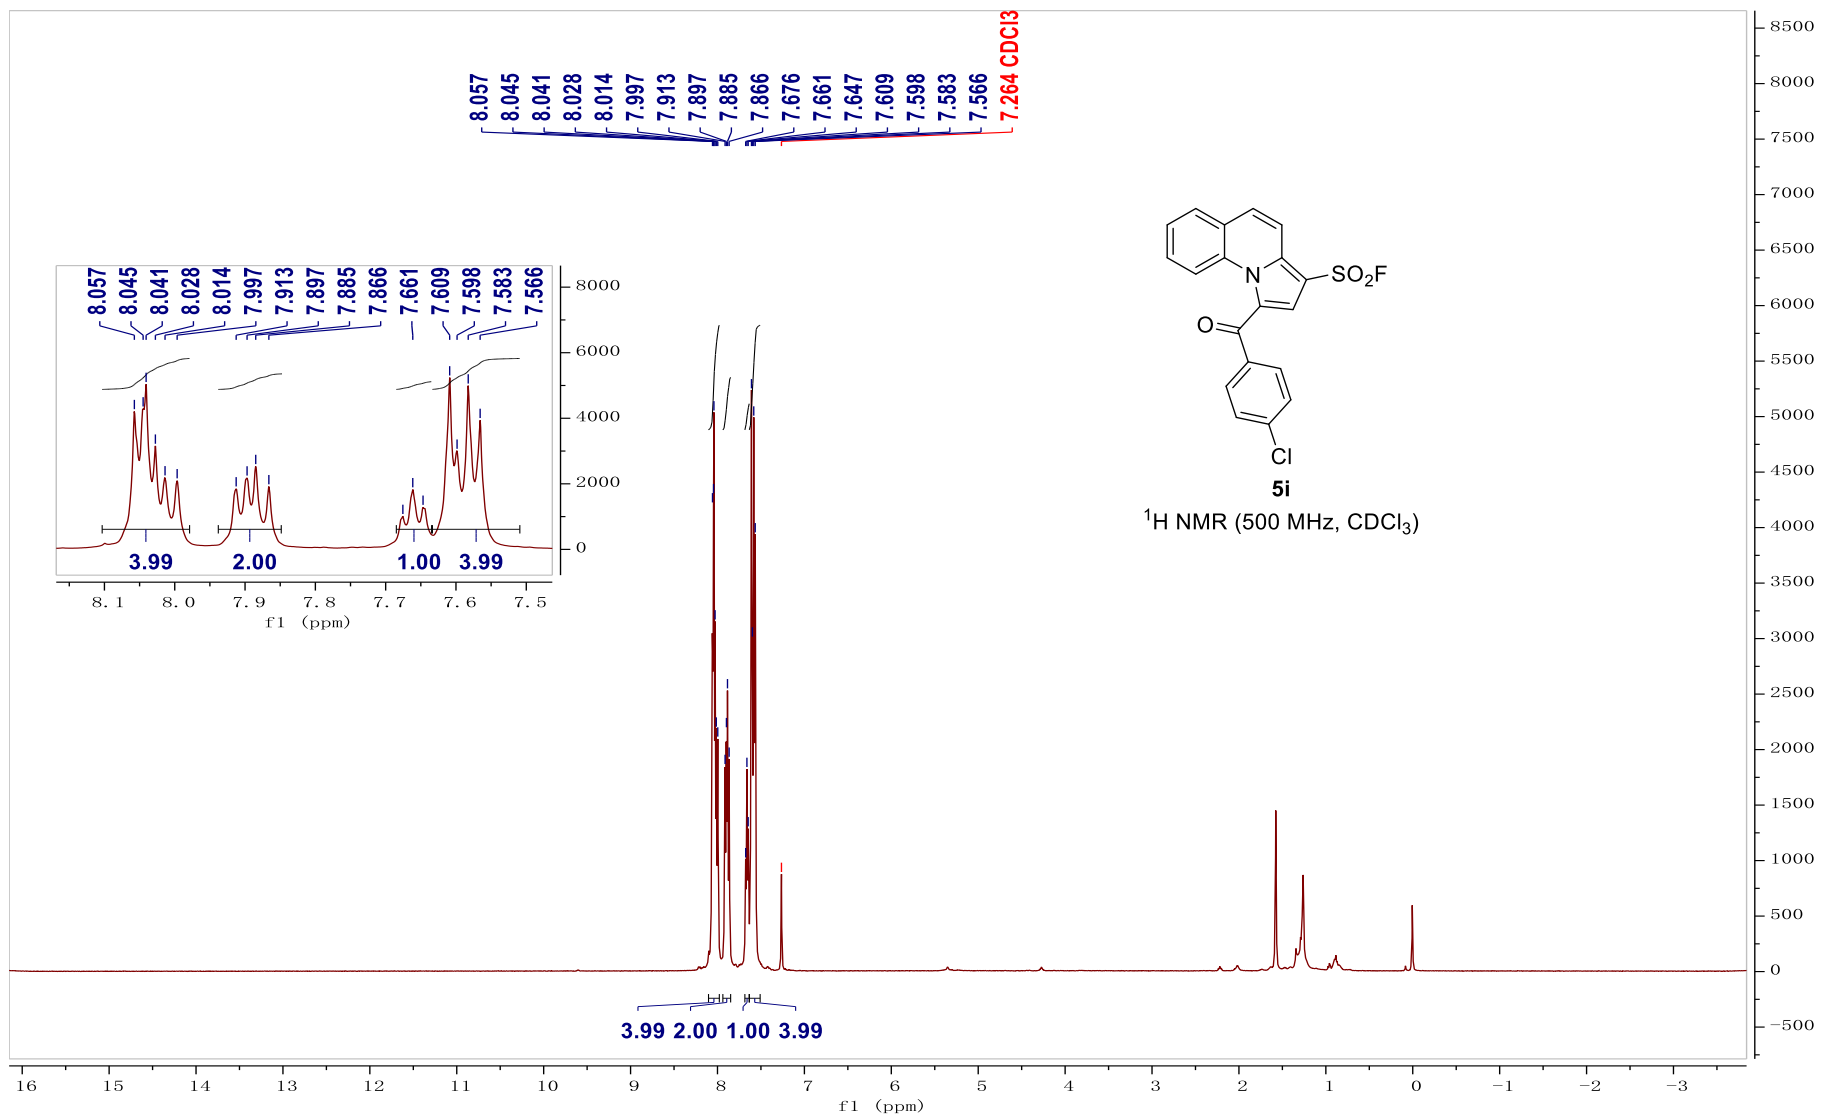

S167

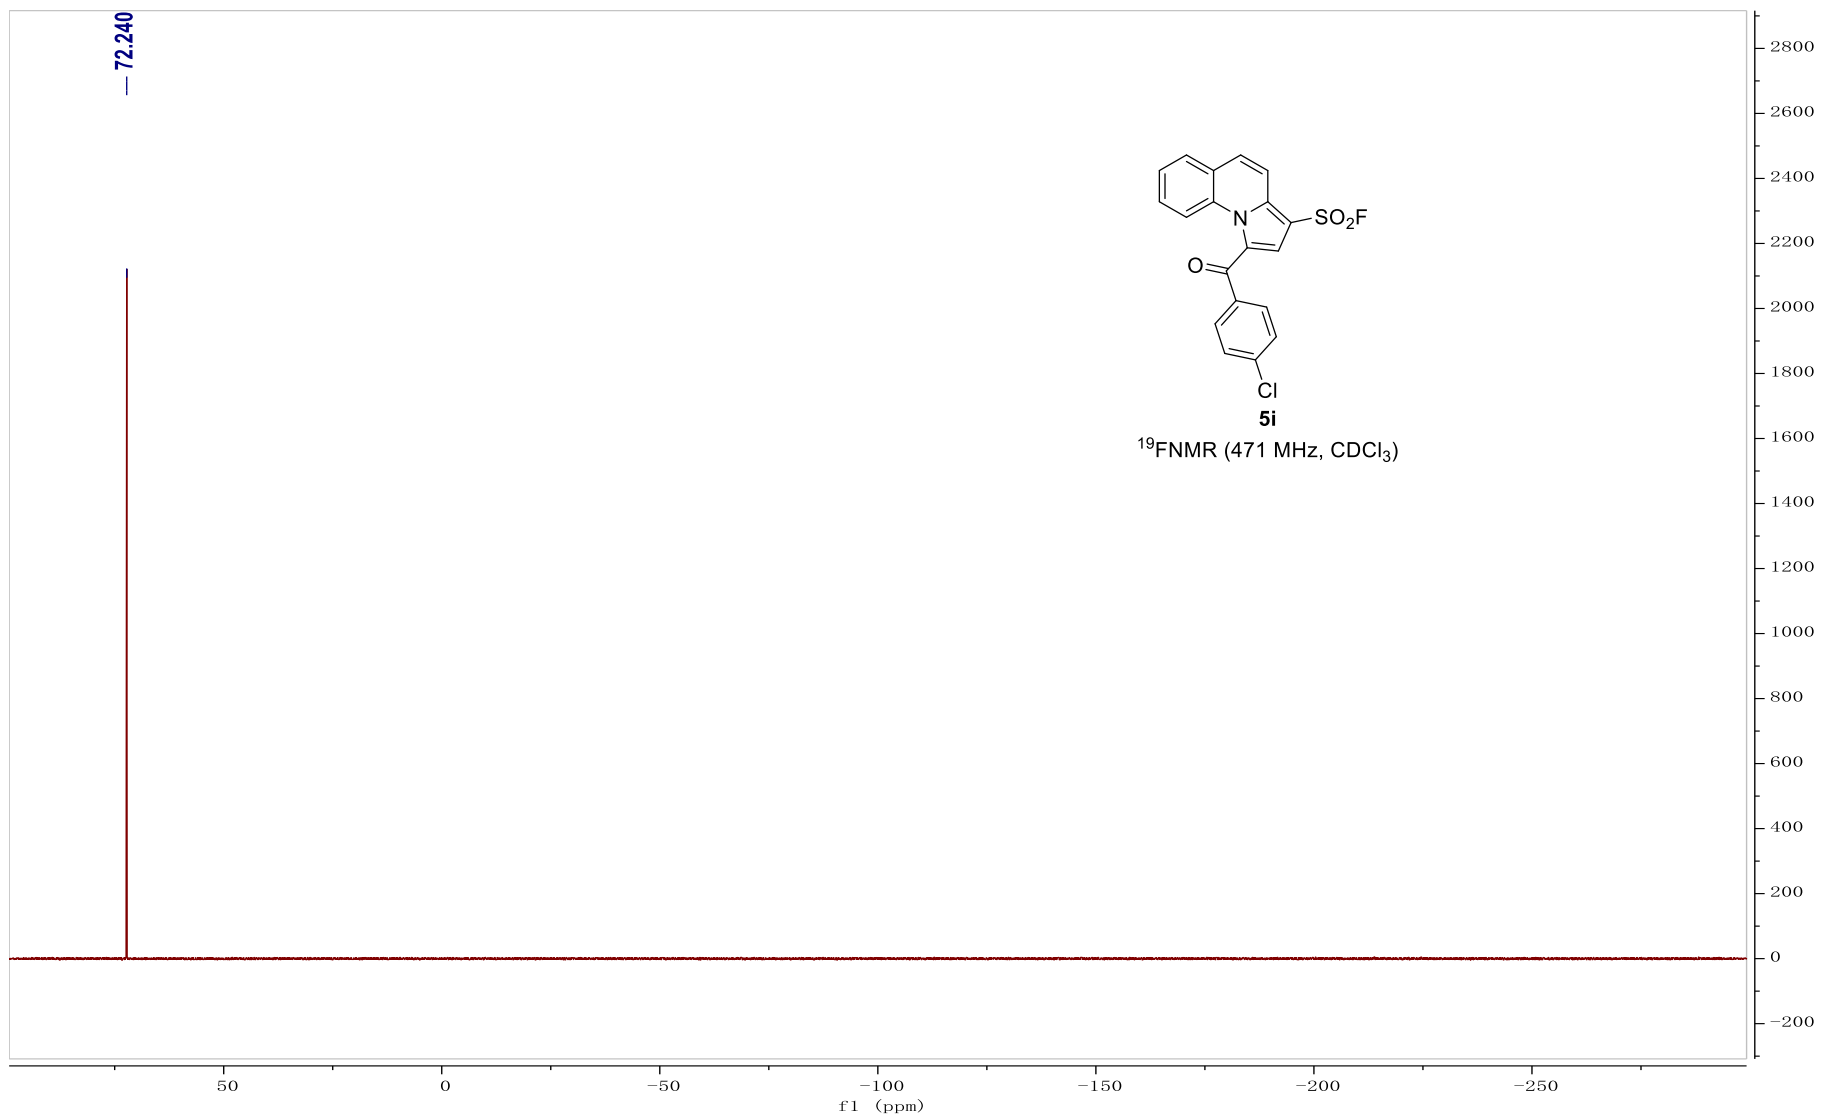

S168

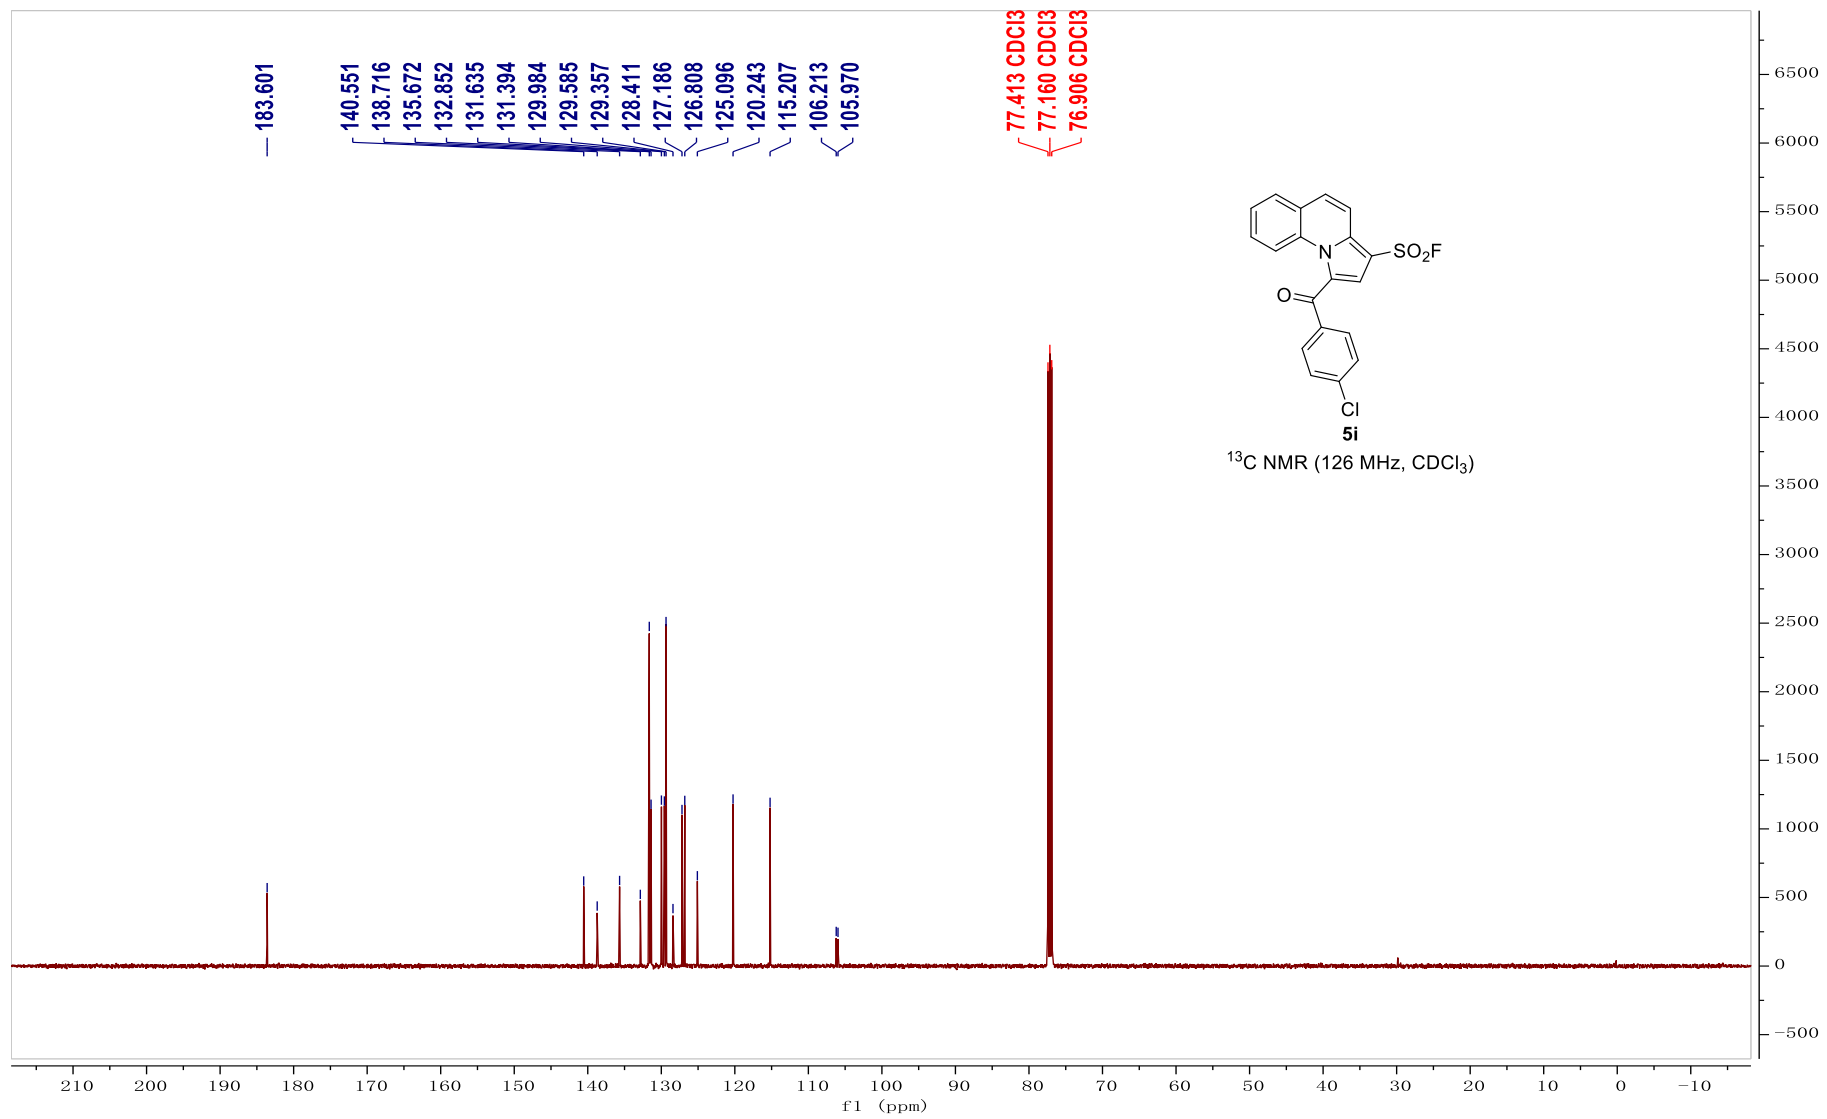

S169

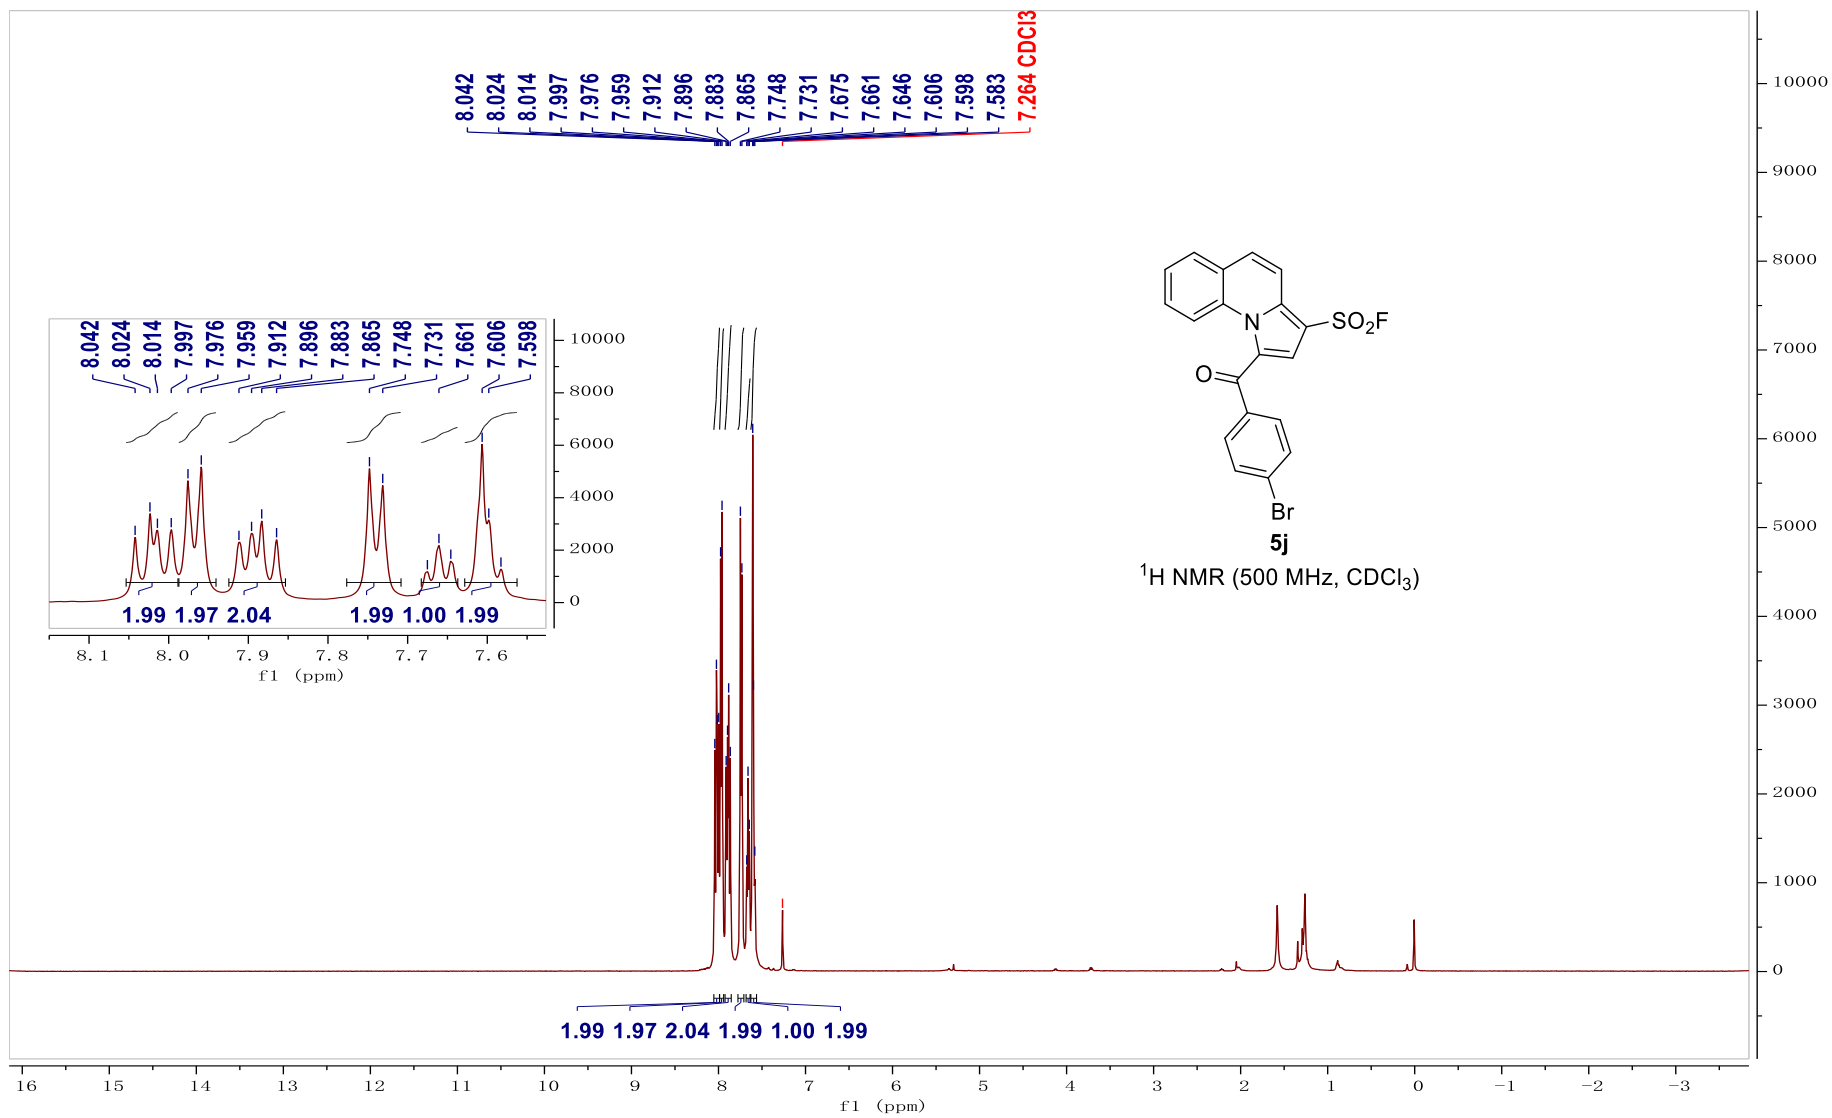

S170

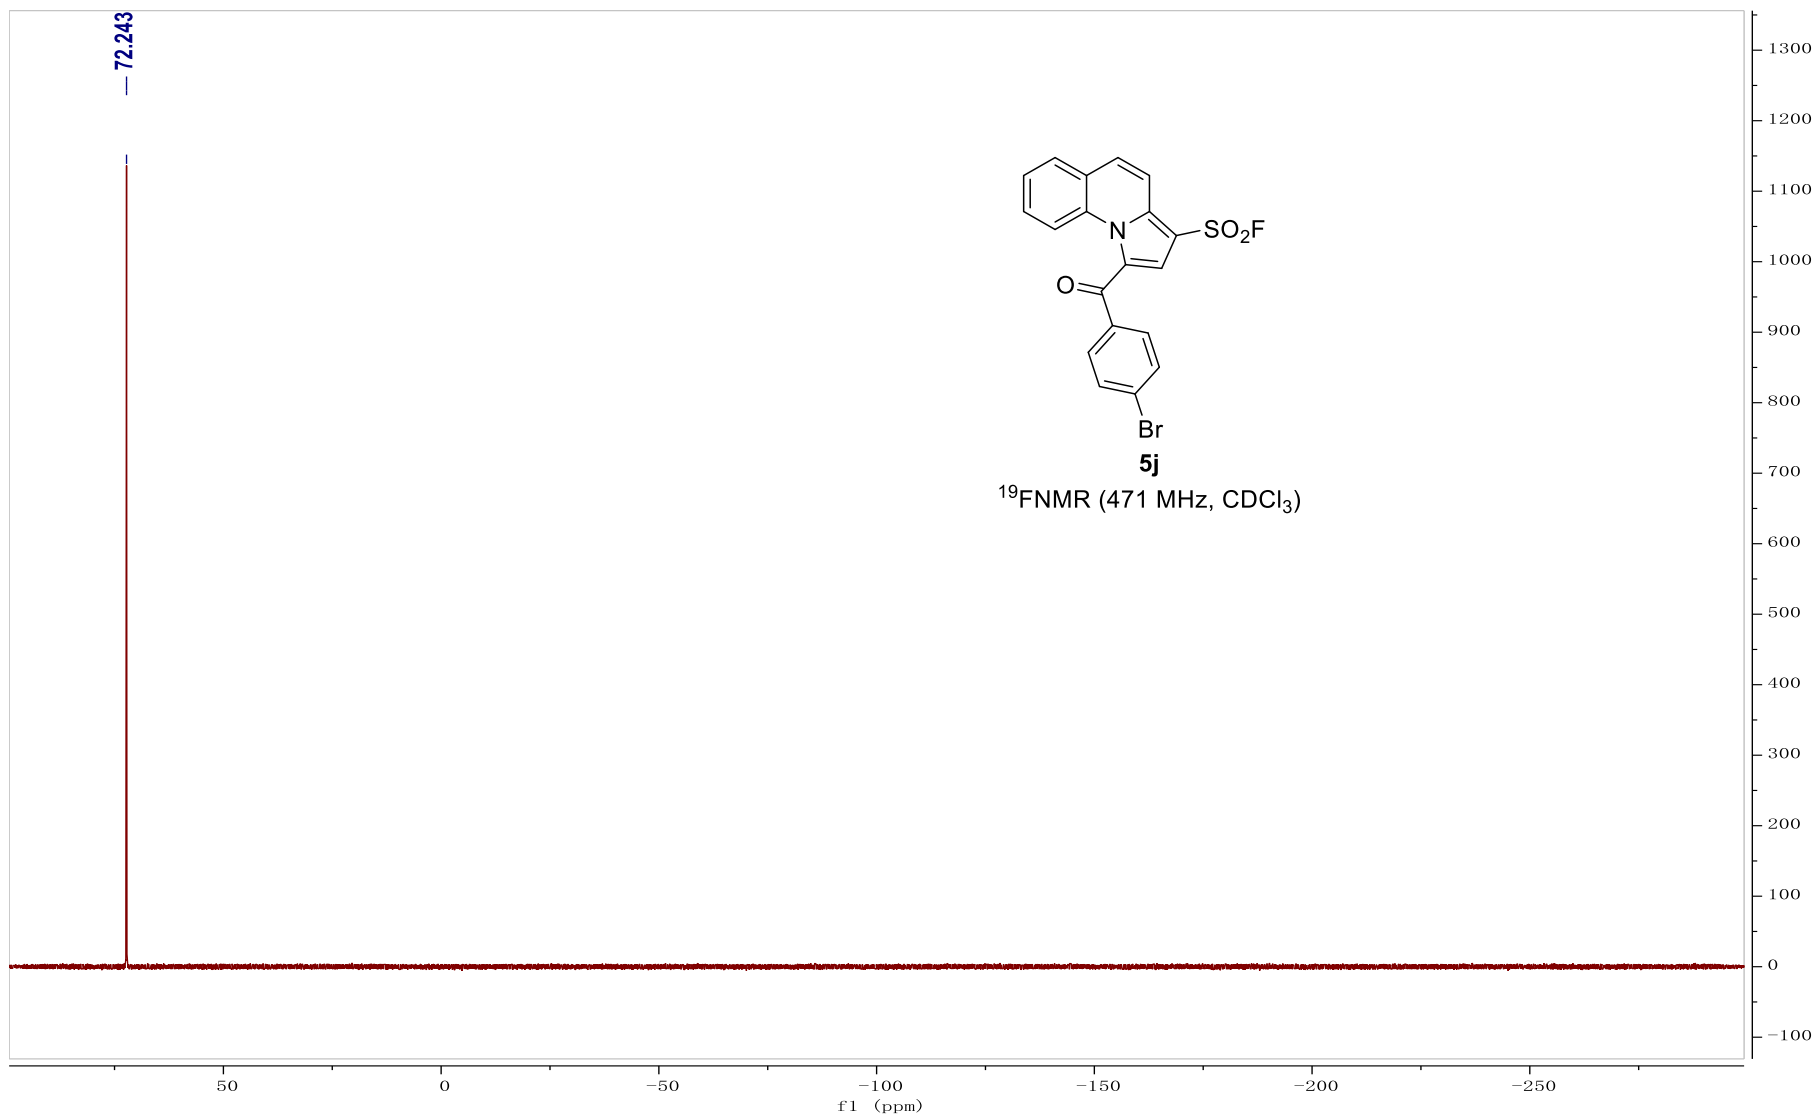

S171

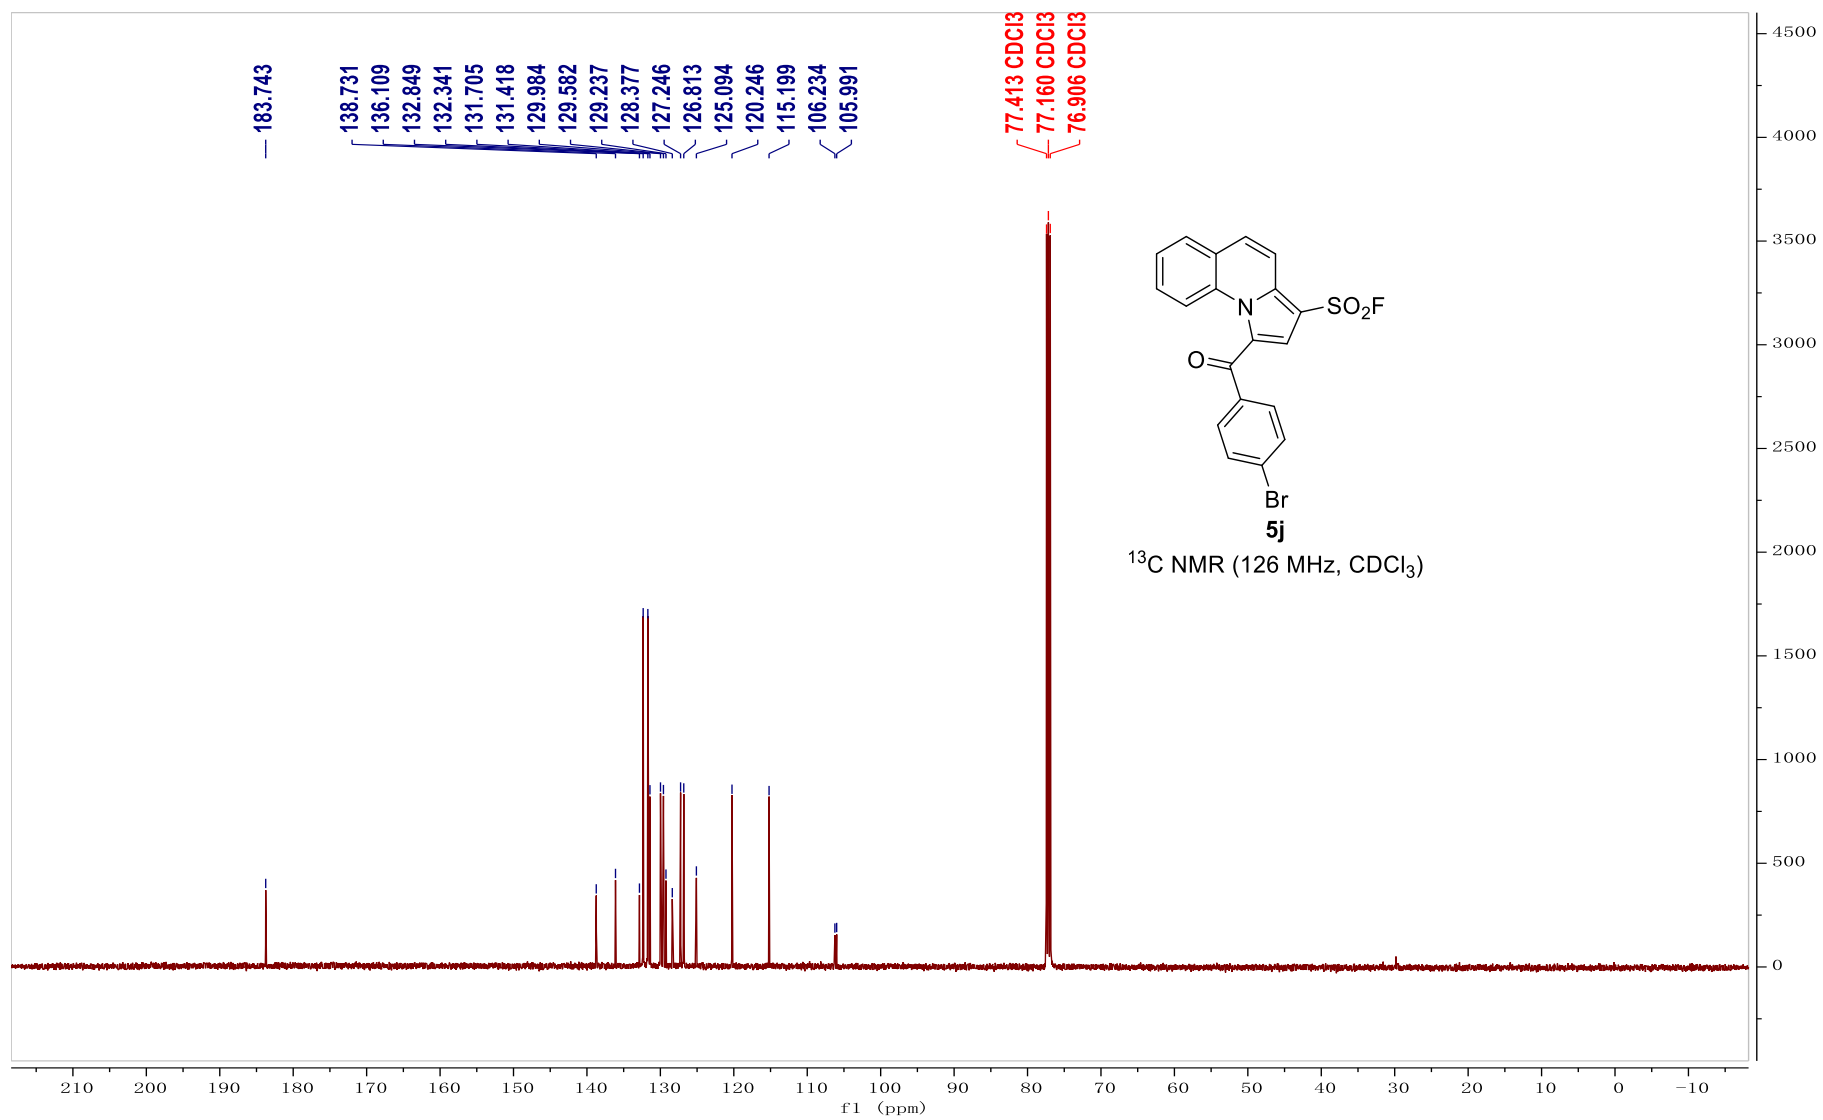

S172

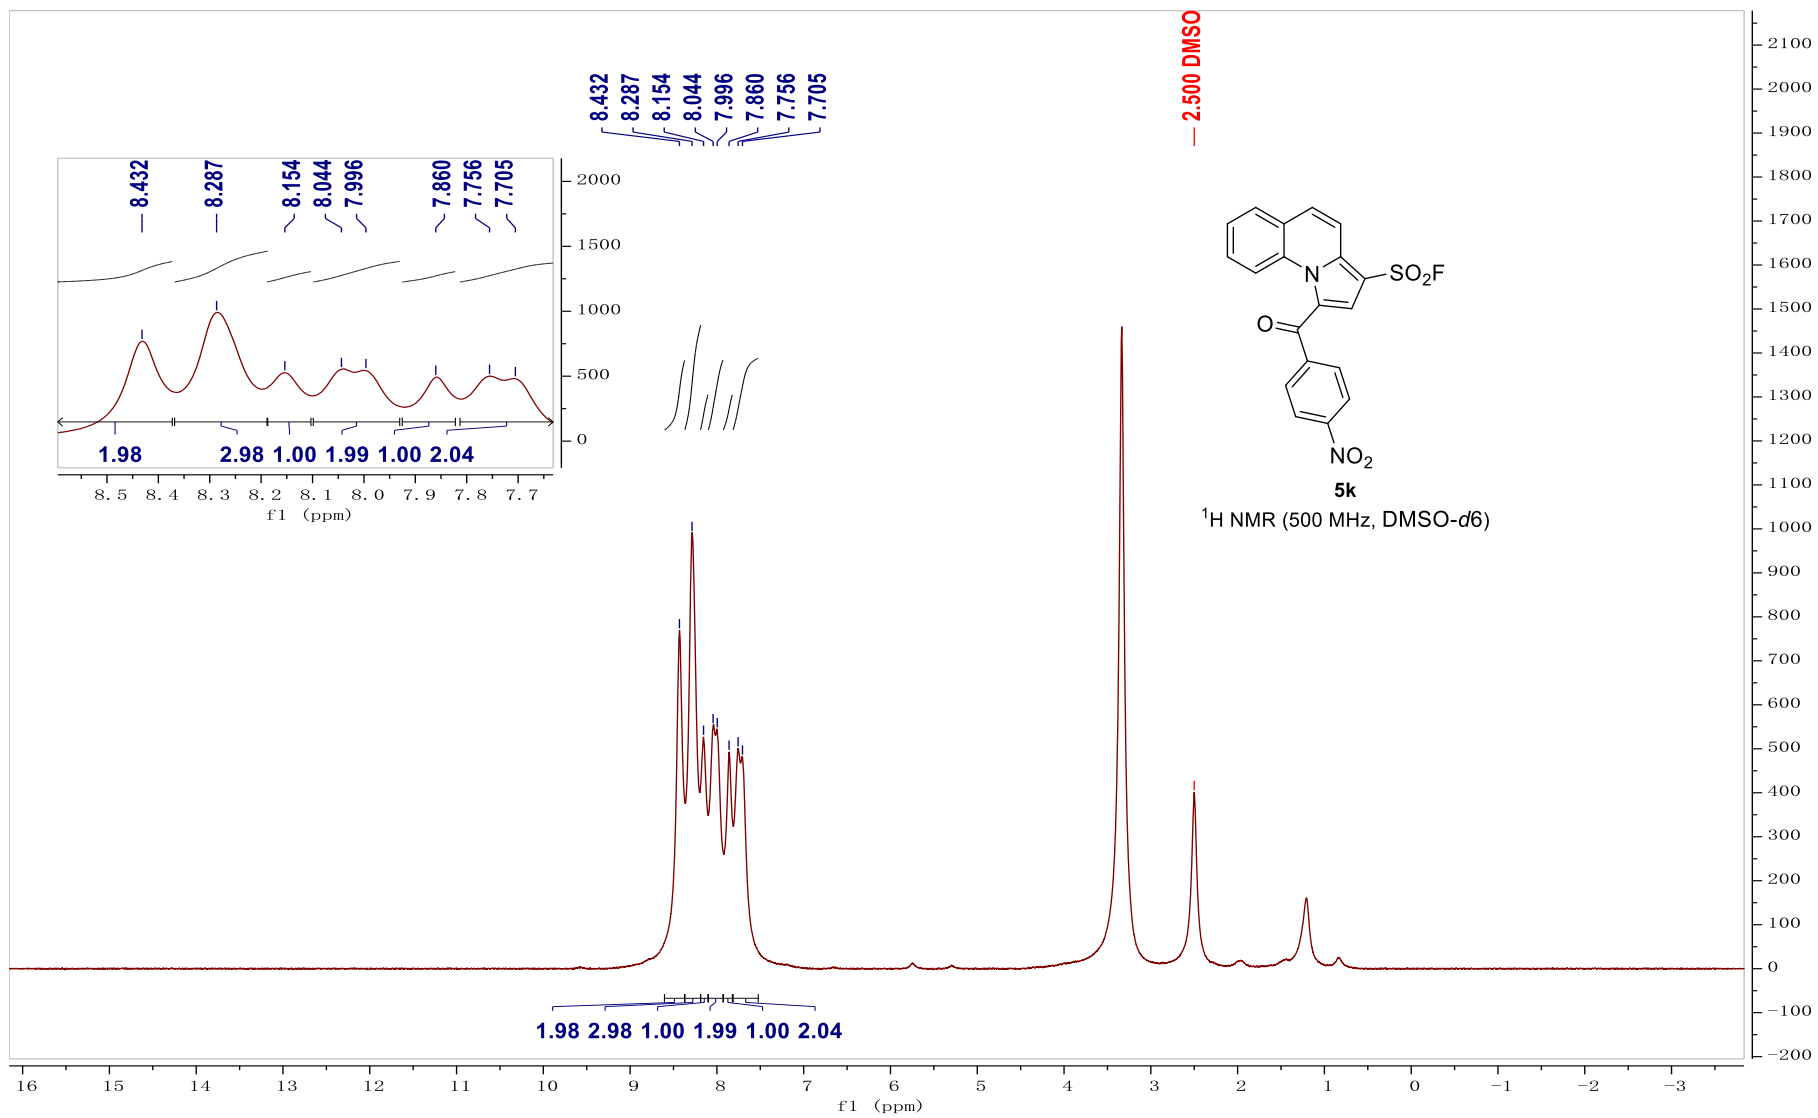

S173

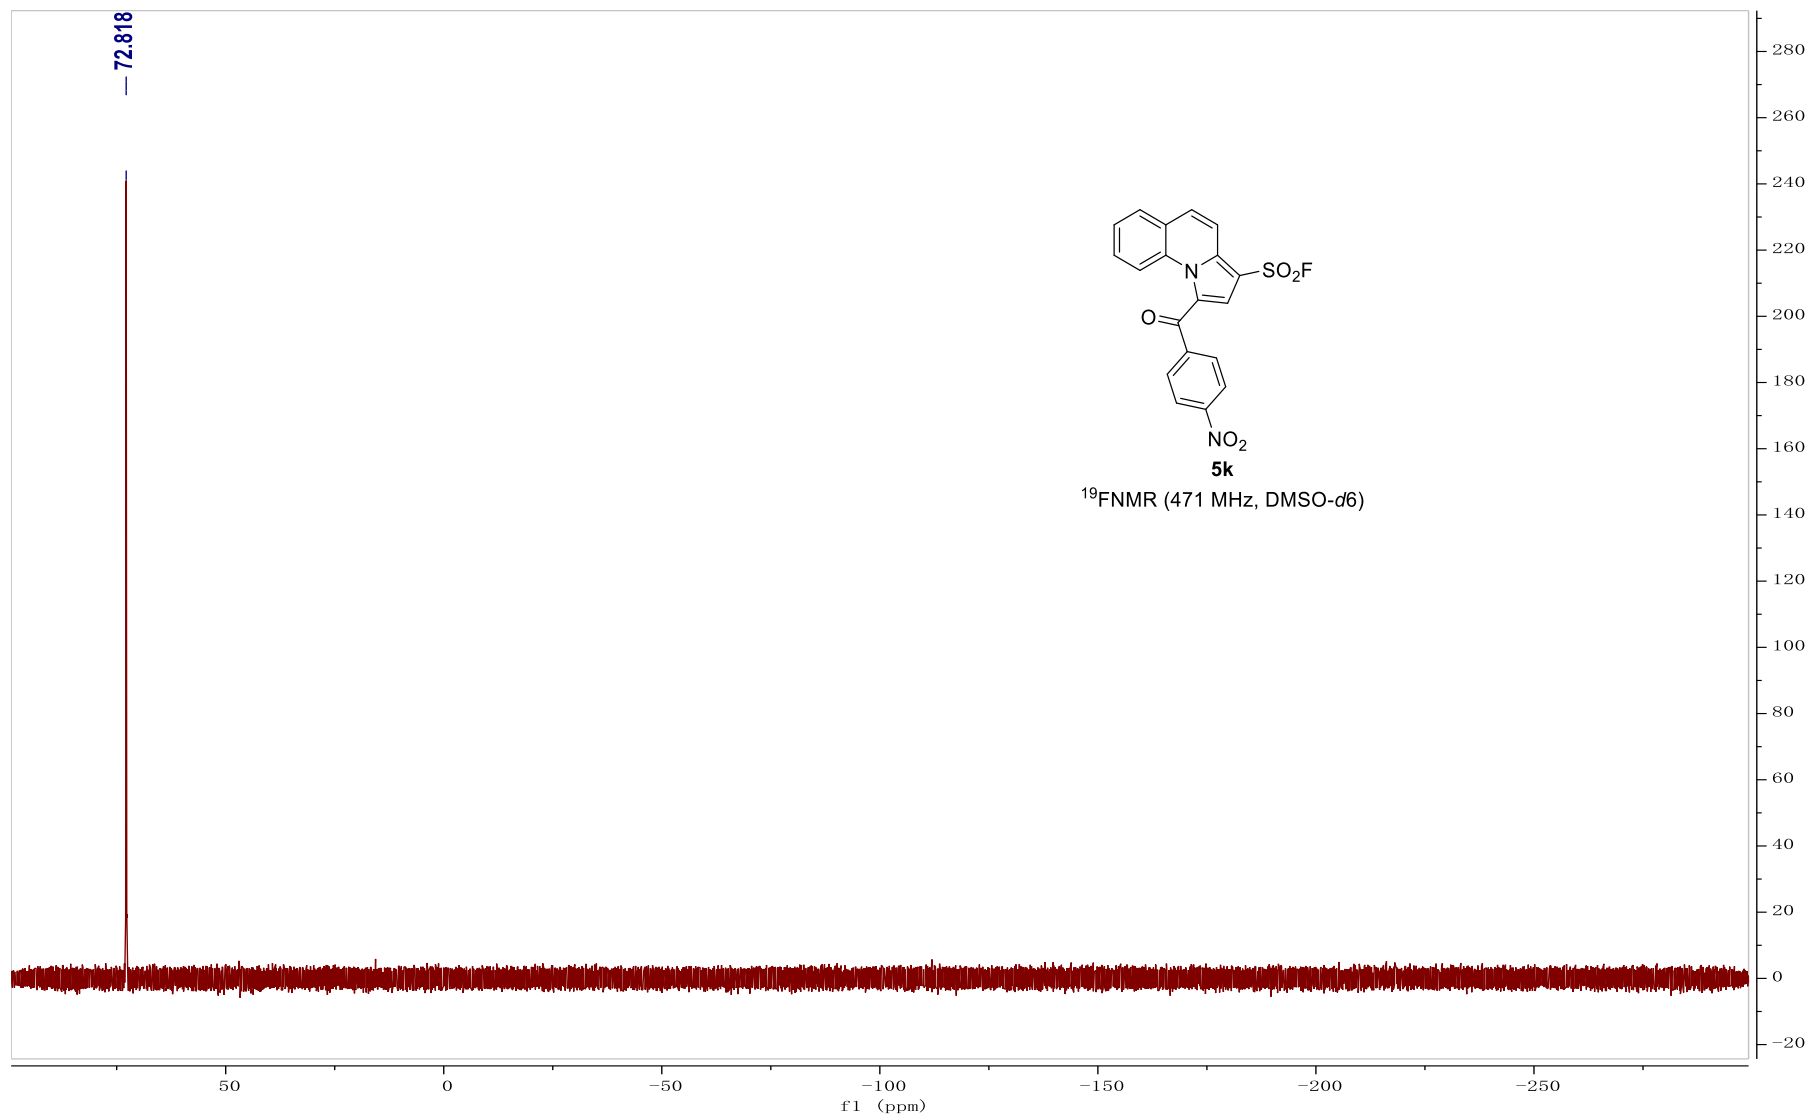

S174



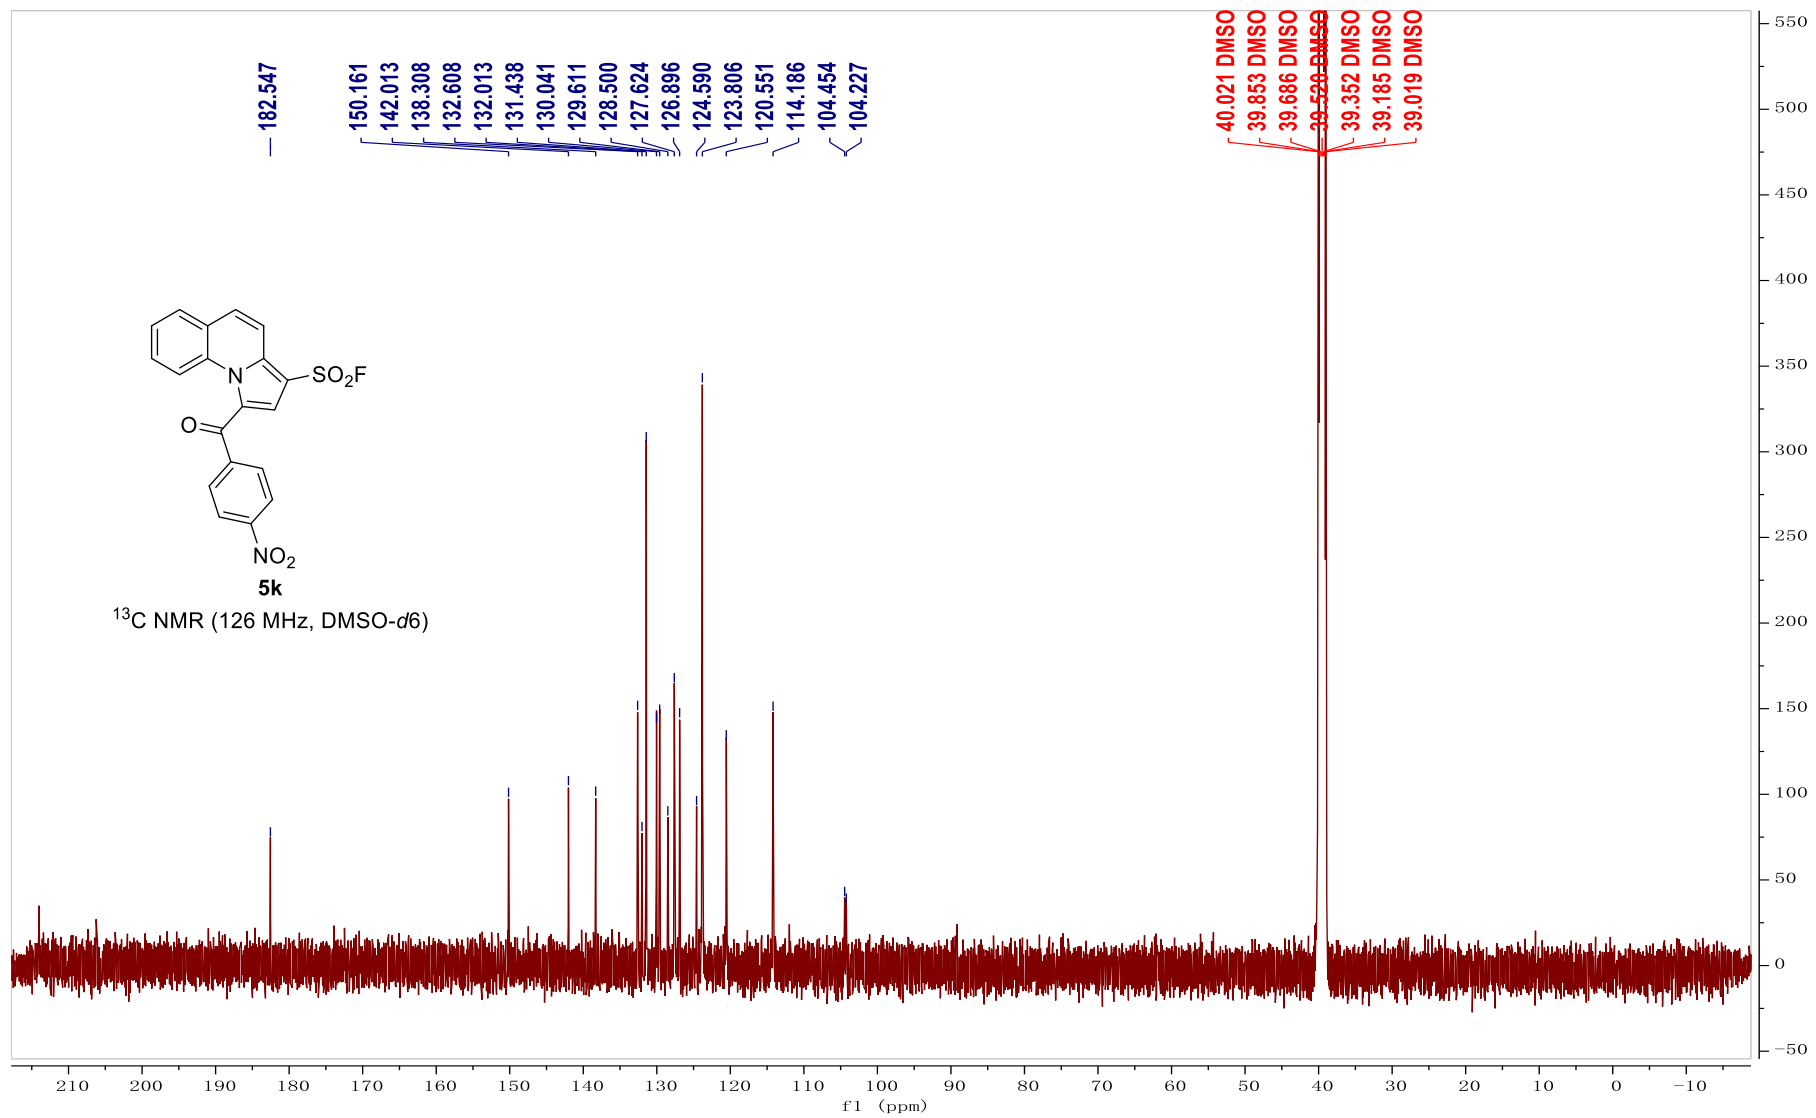

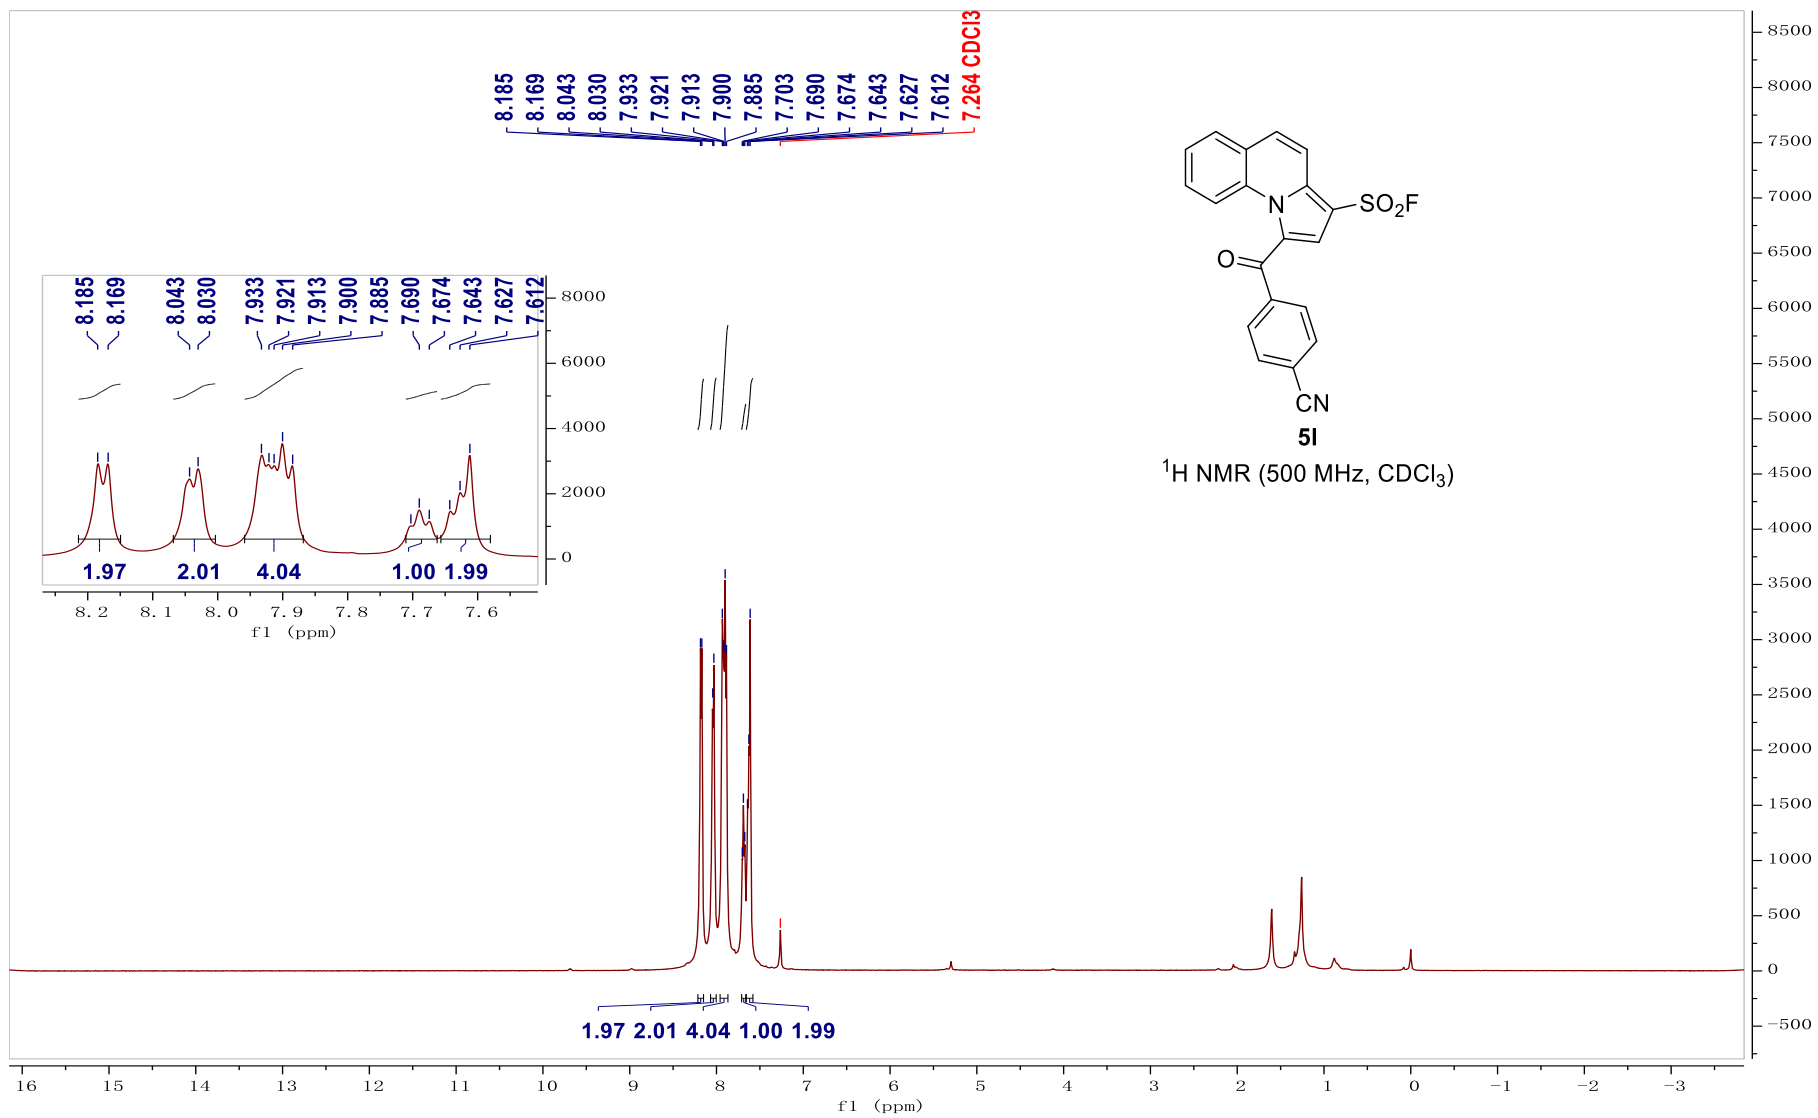

S176

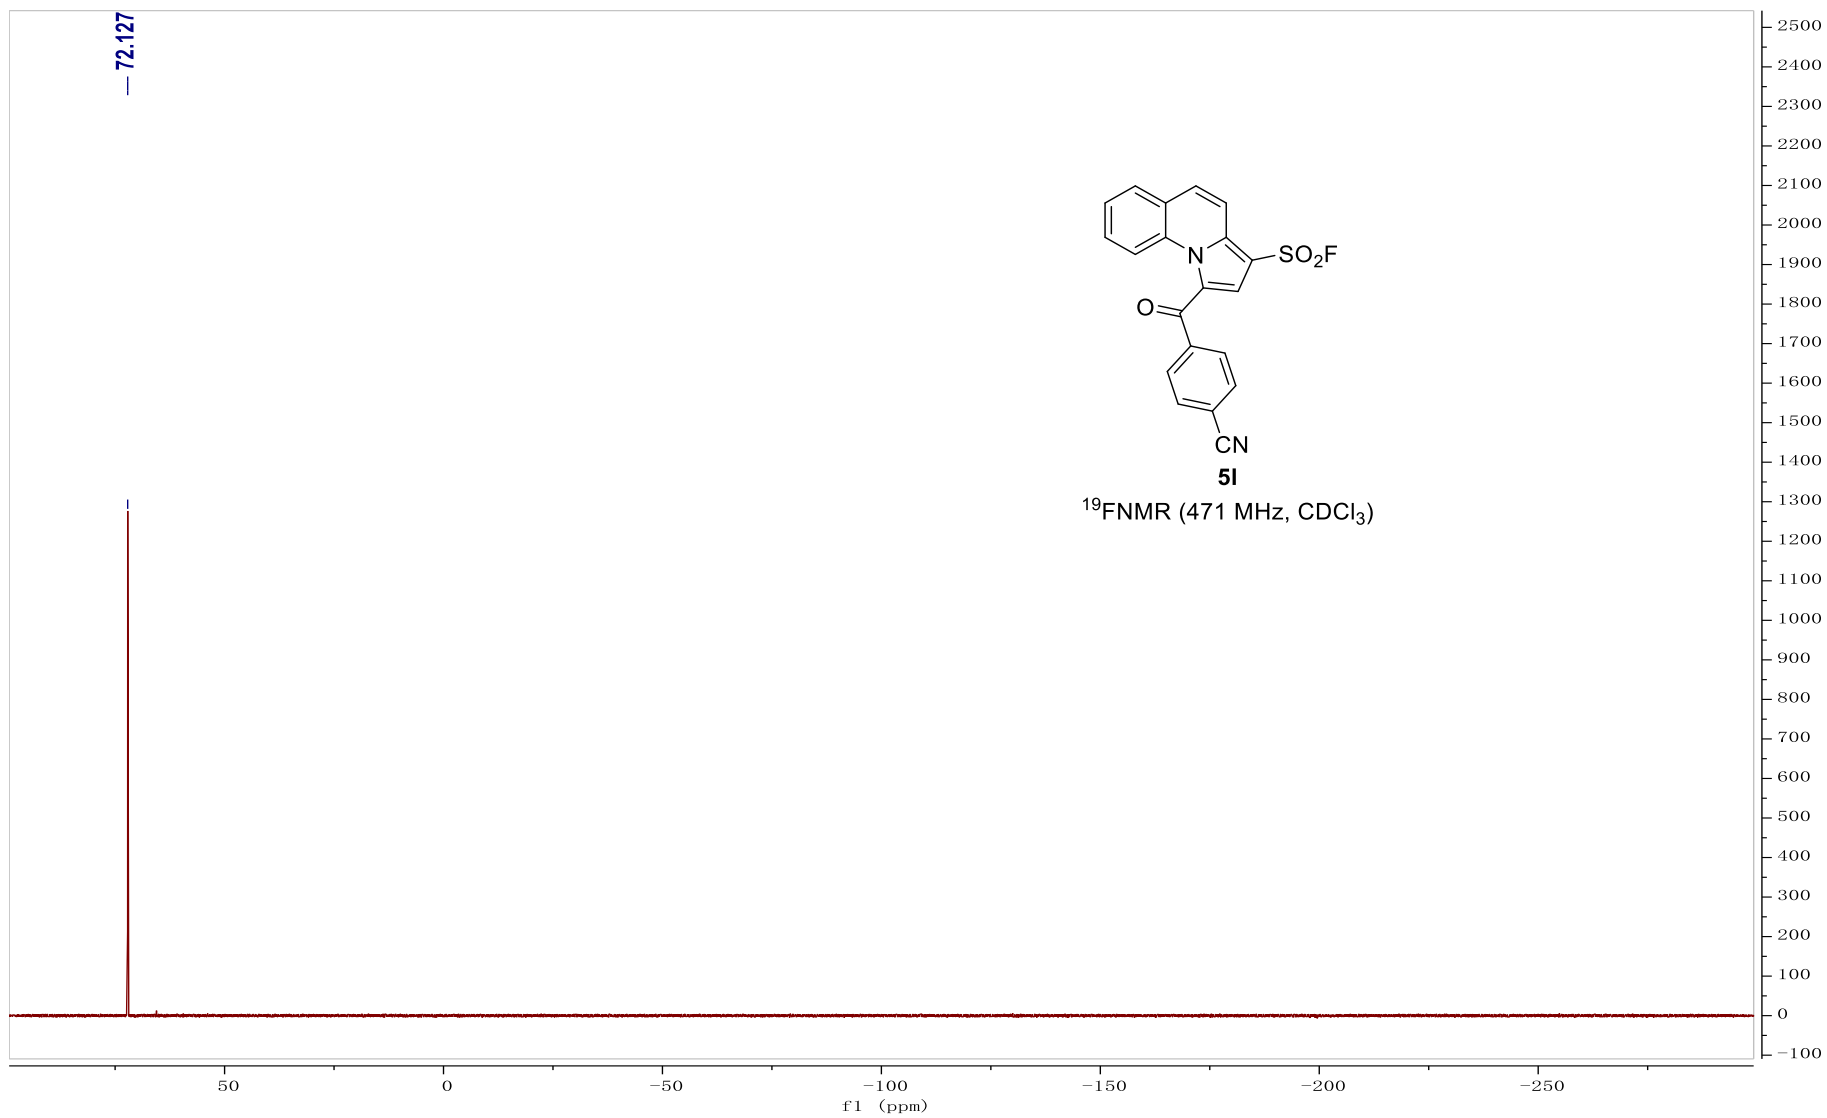

S177

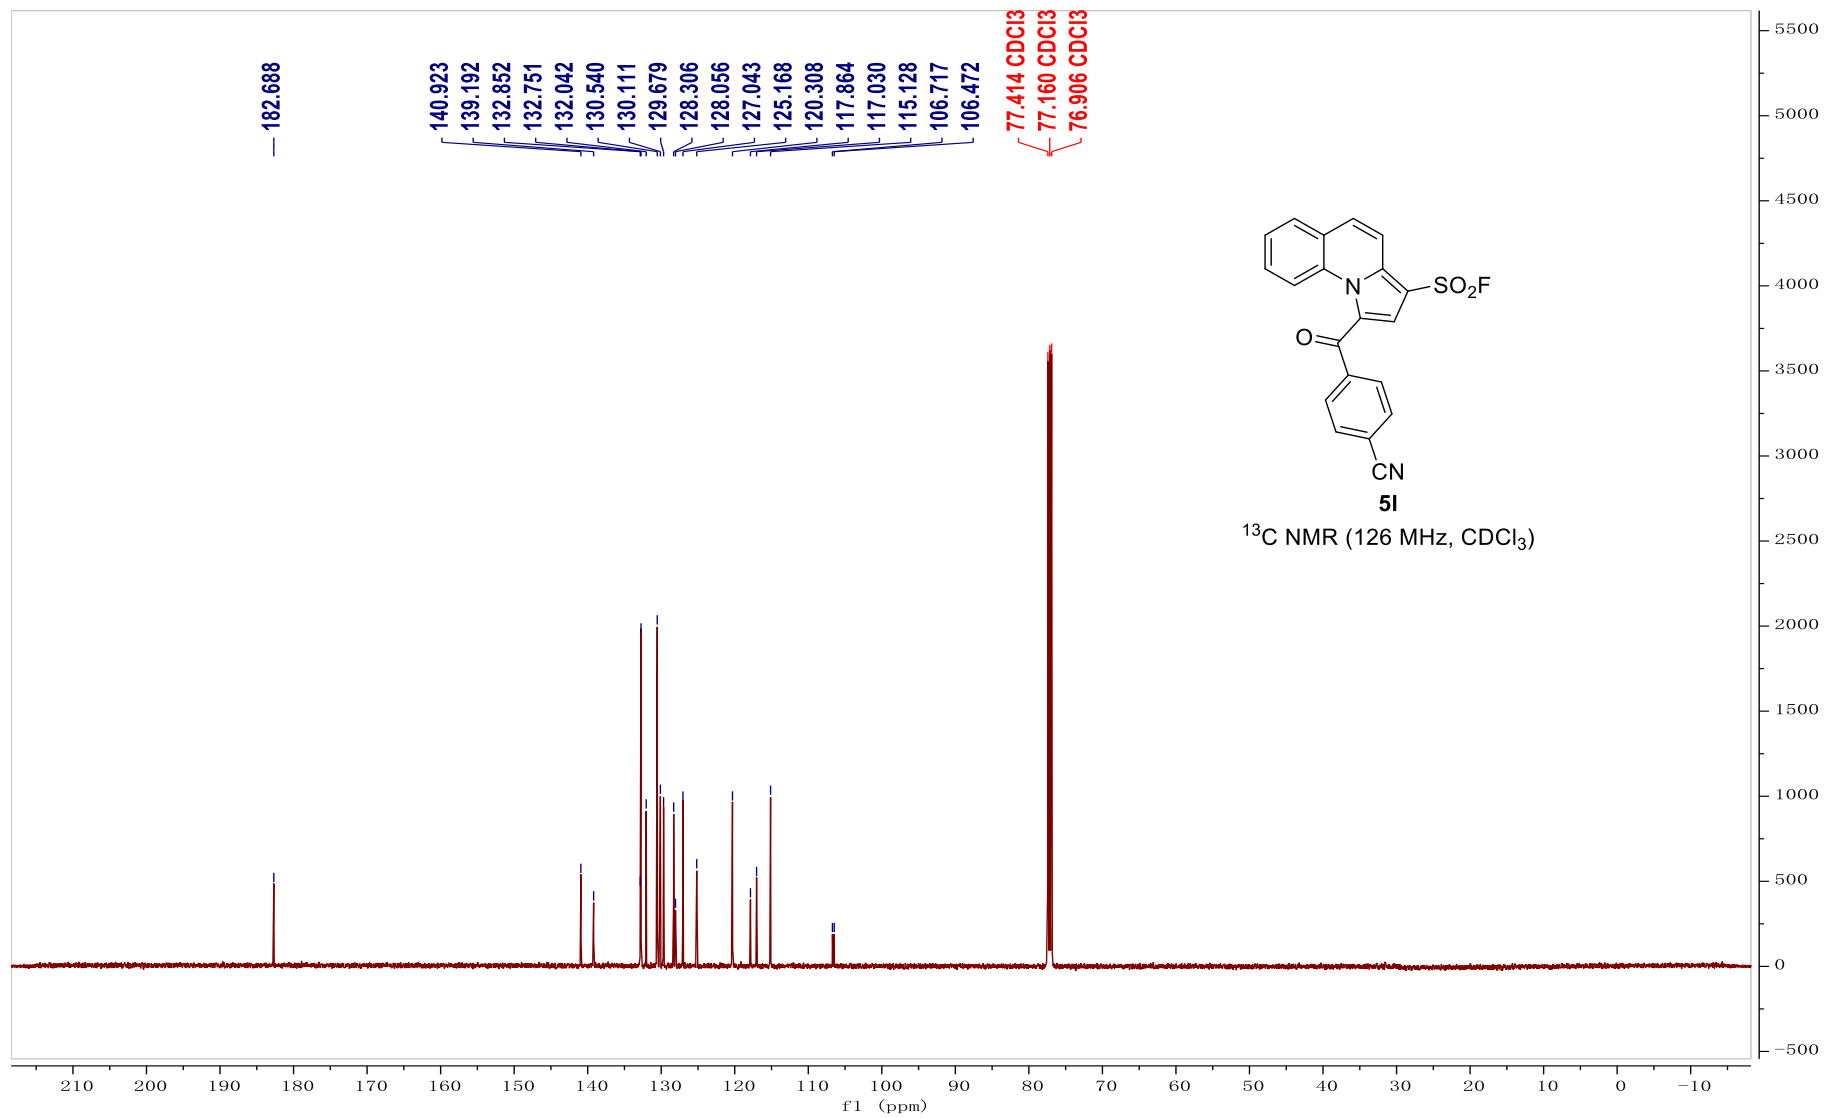

S178

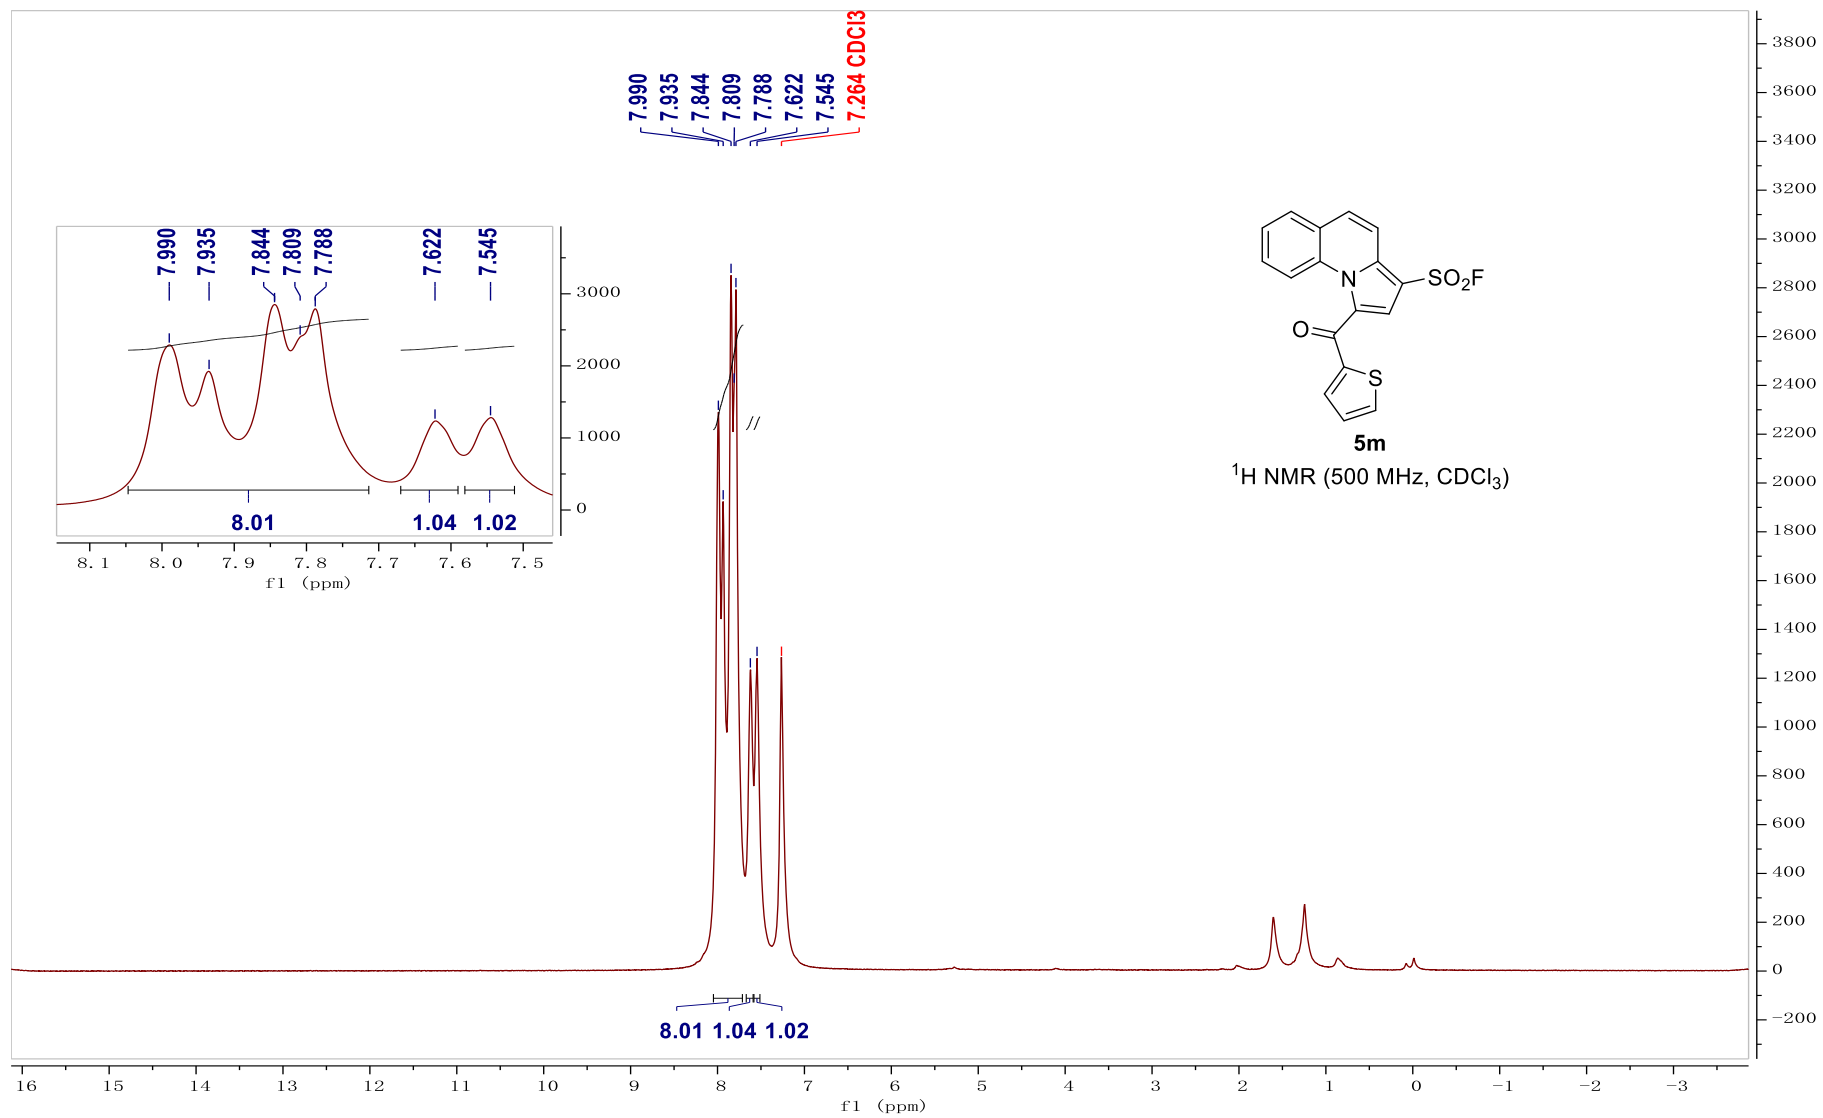

S179

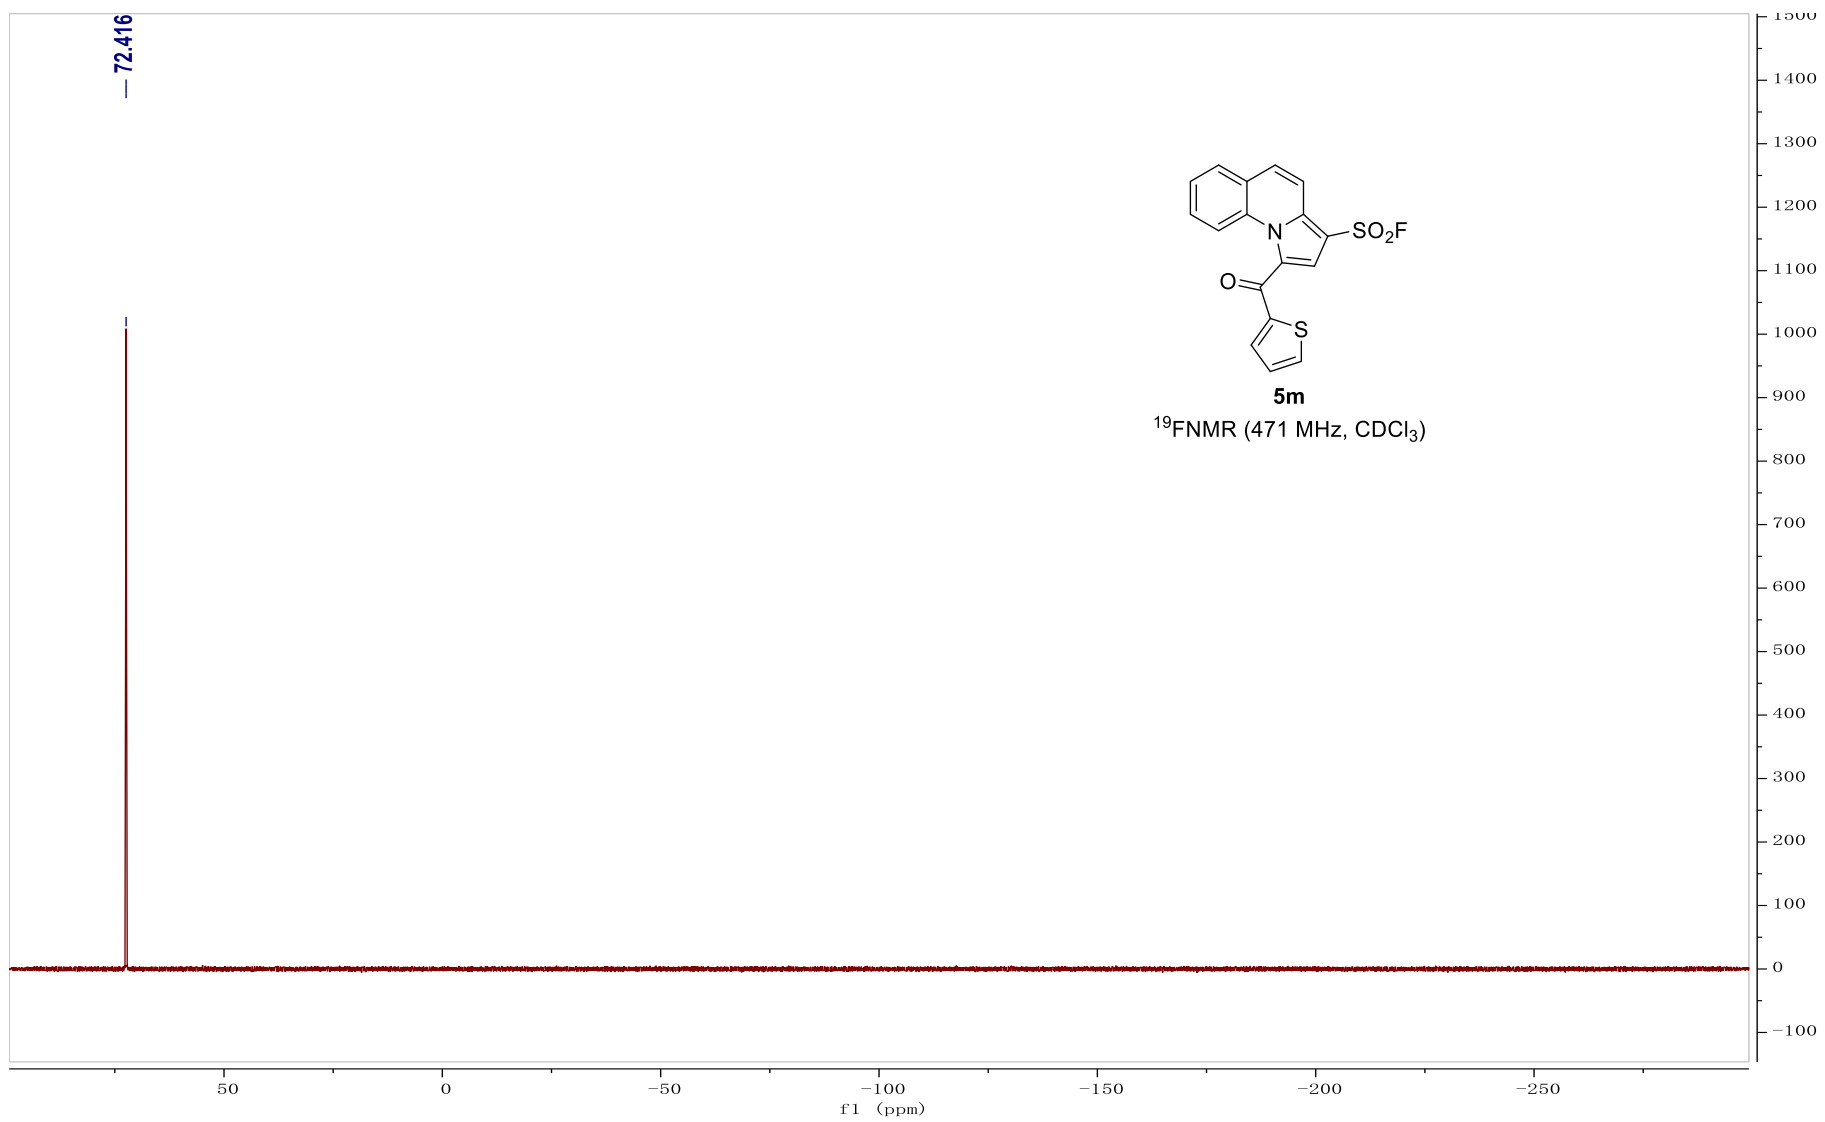

S180

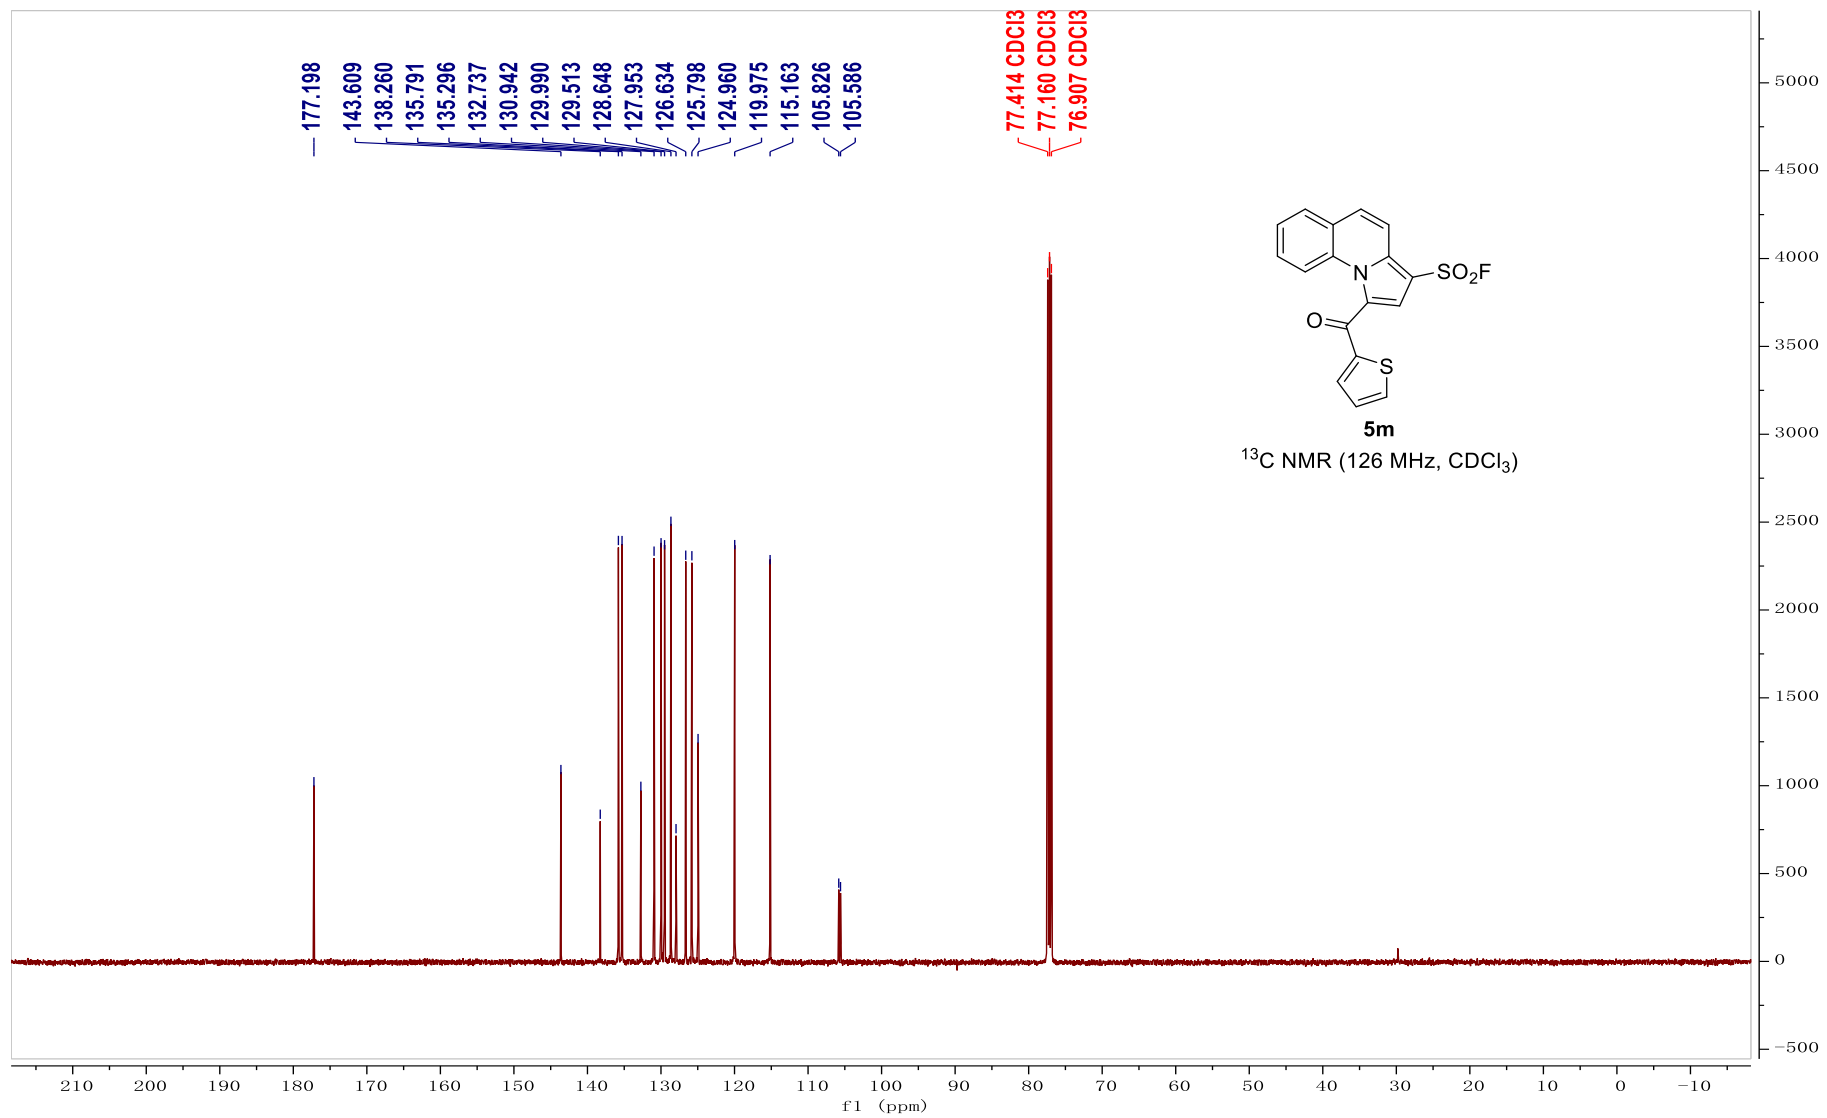

S181

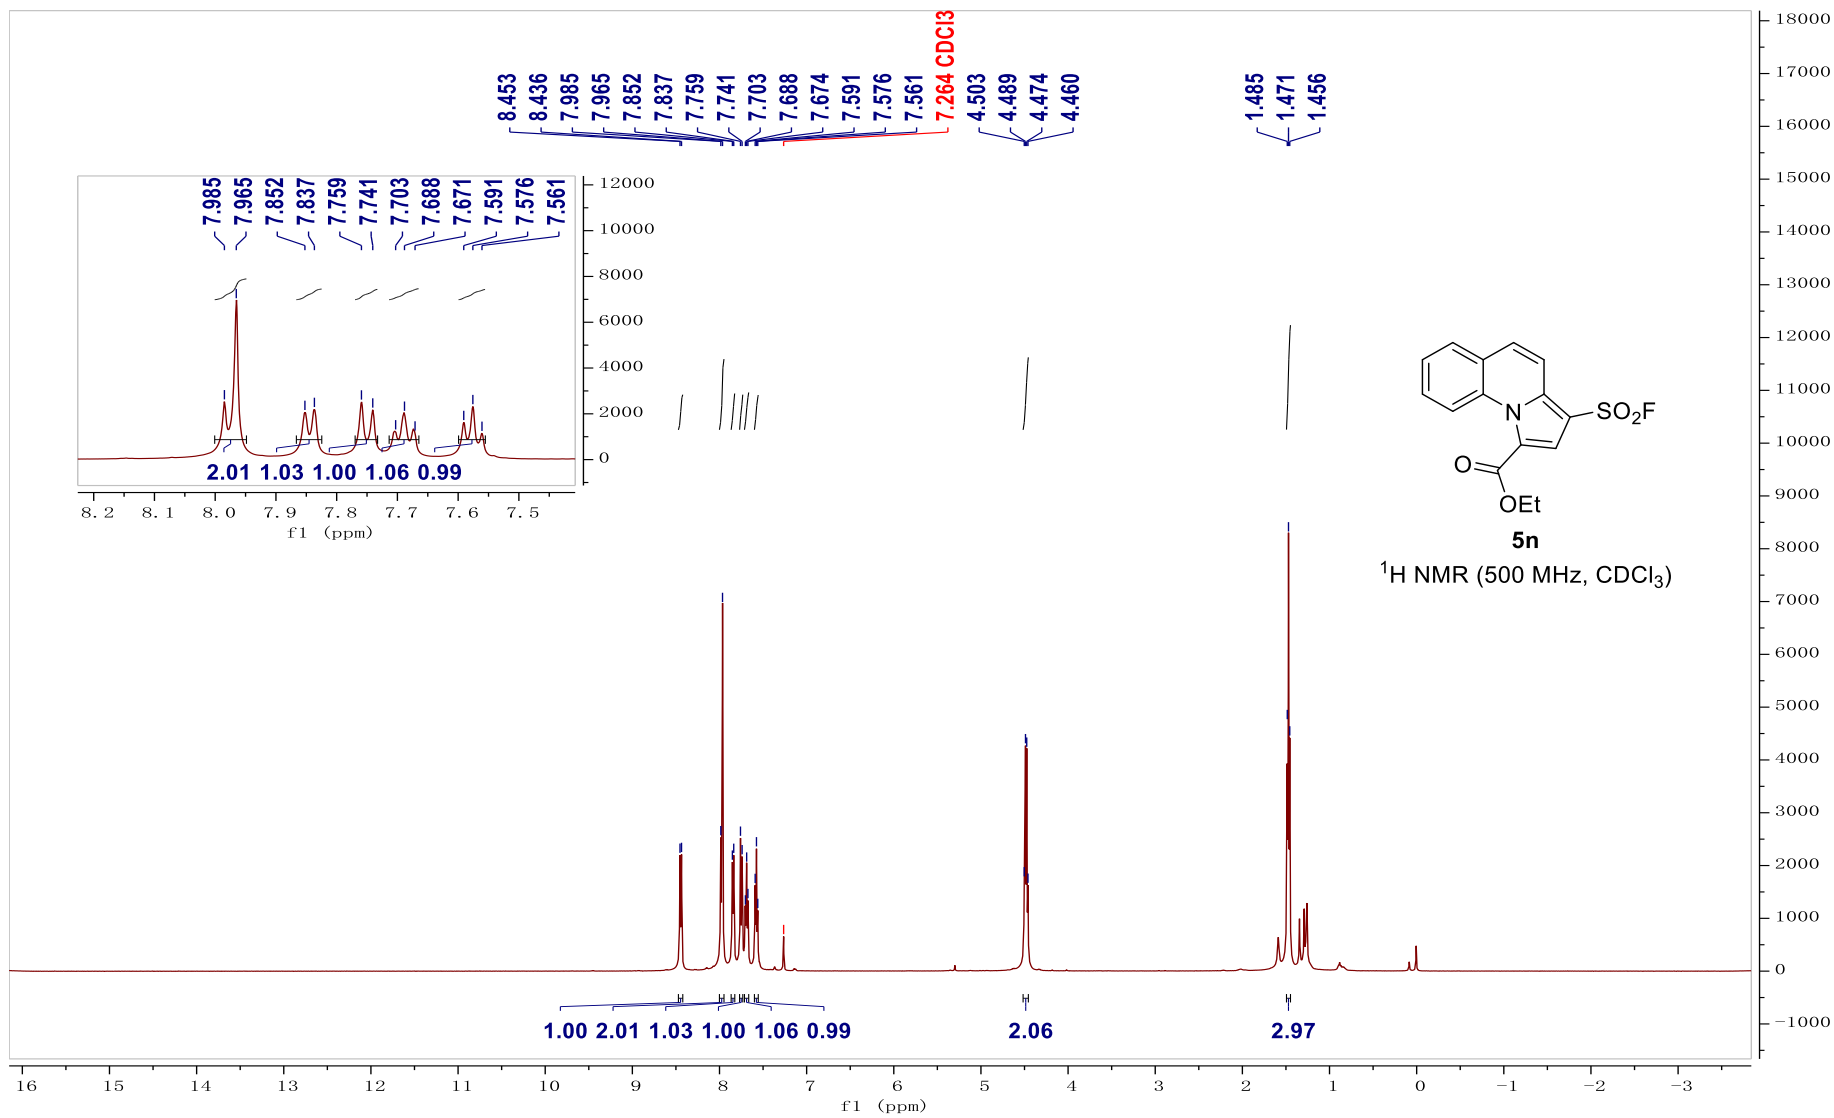

S182



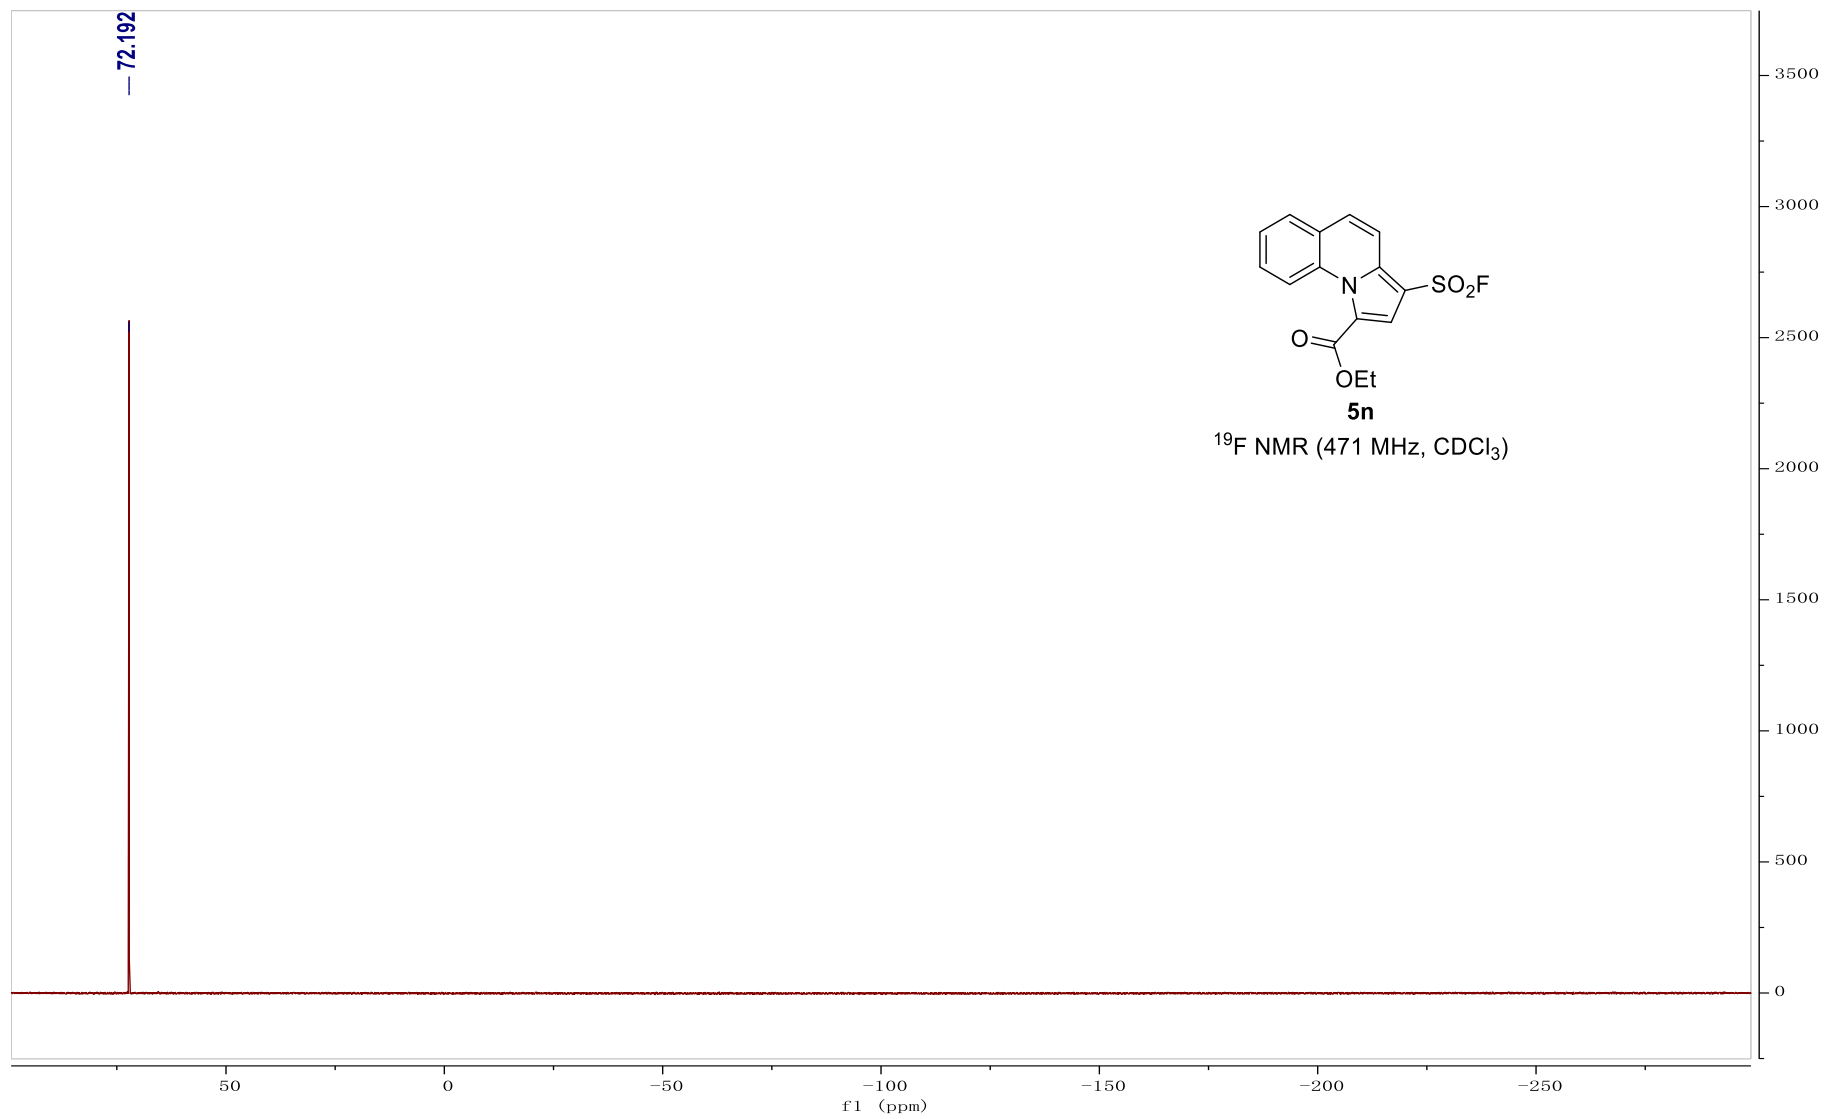

S183

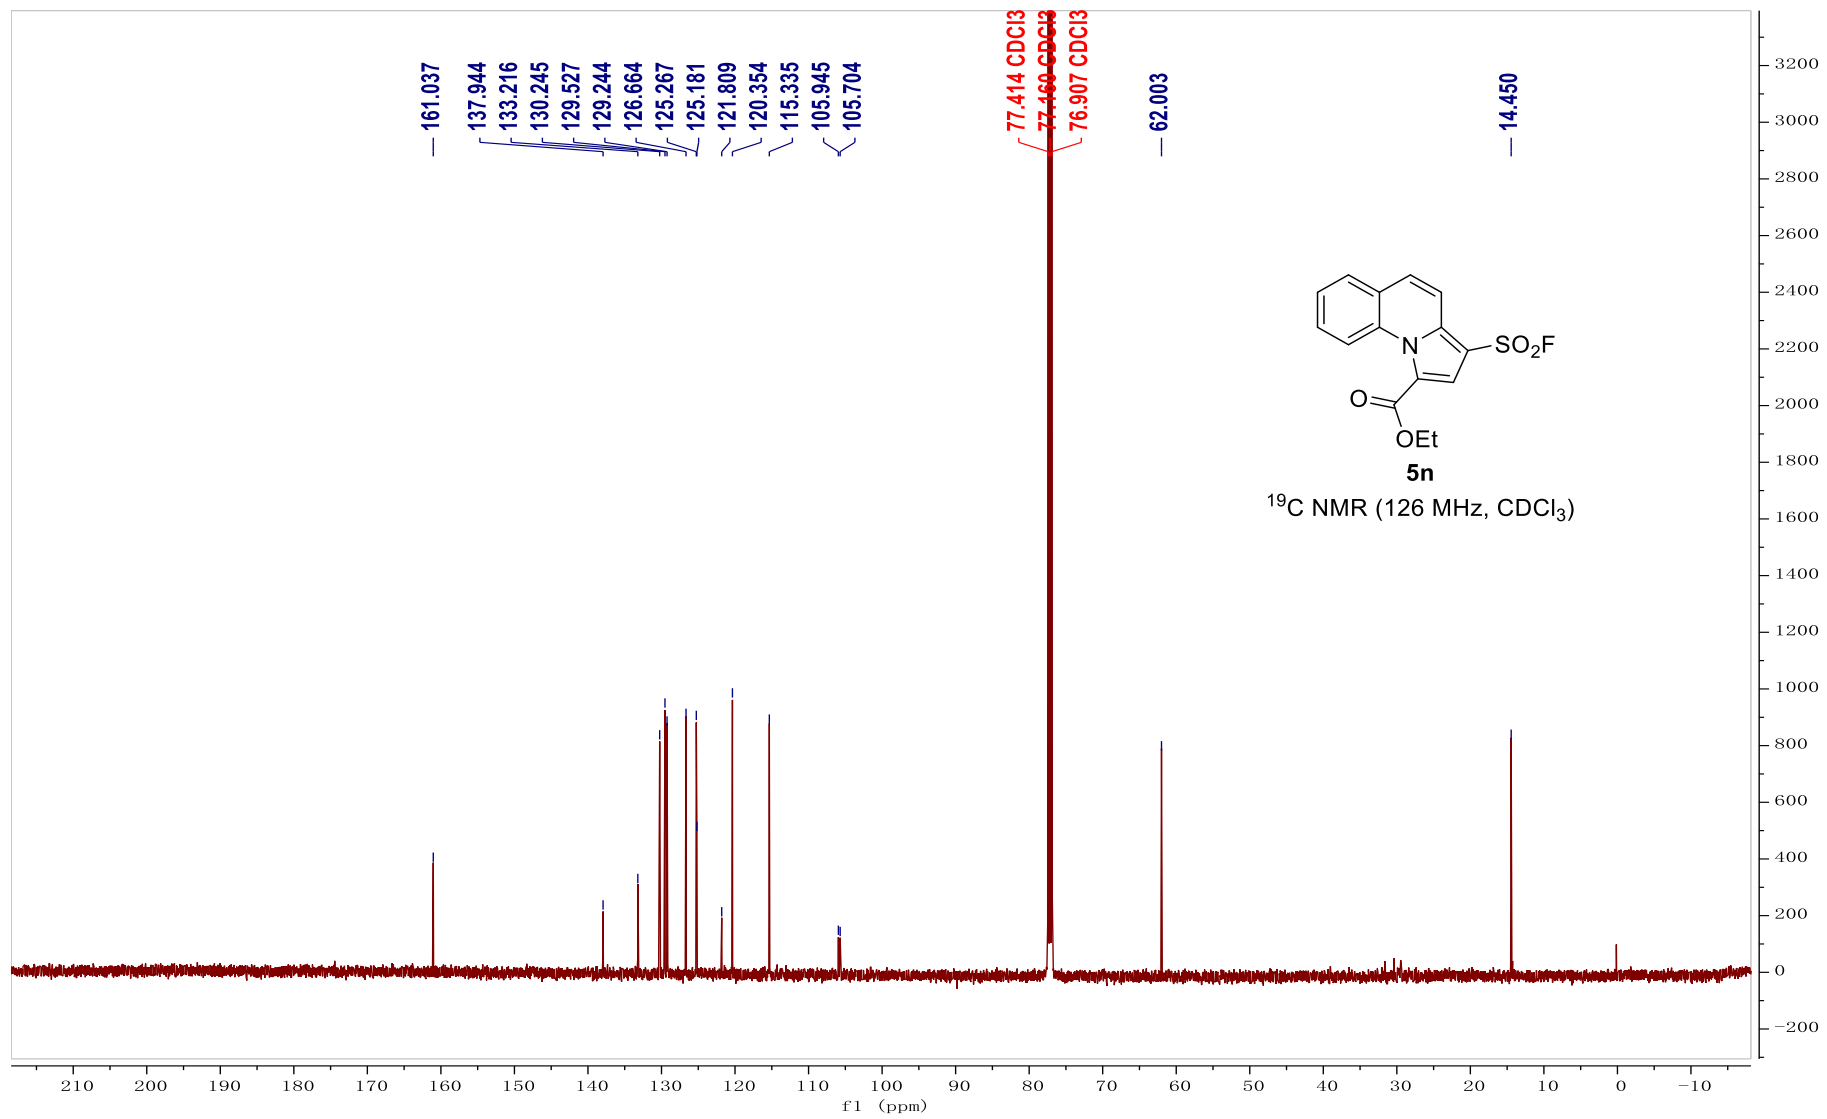

S184

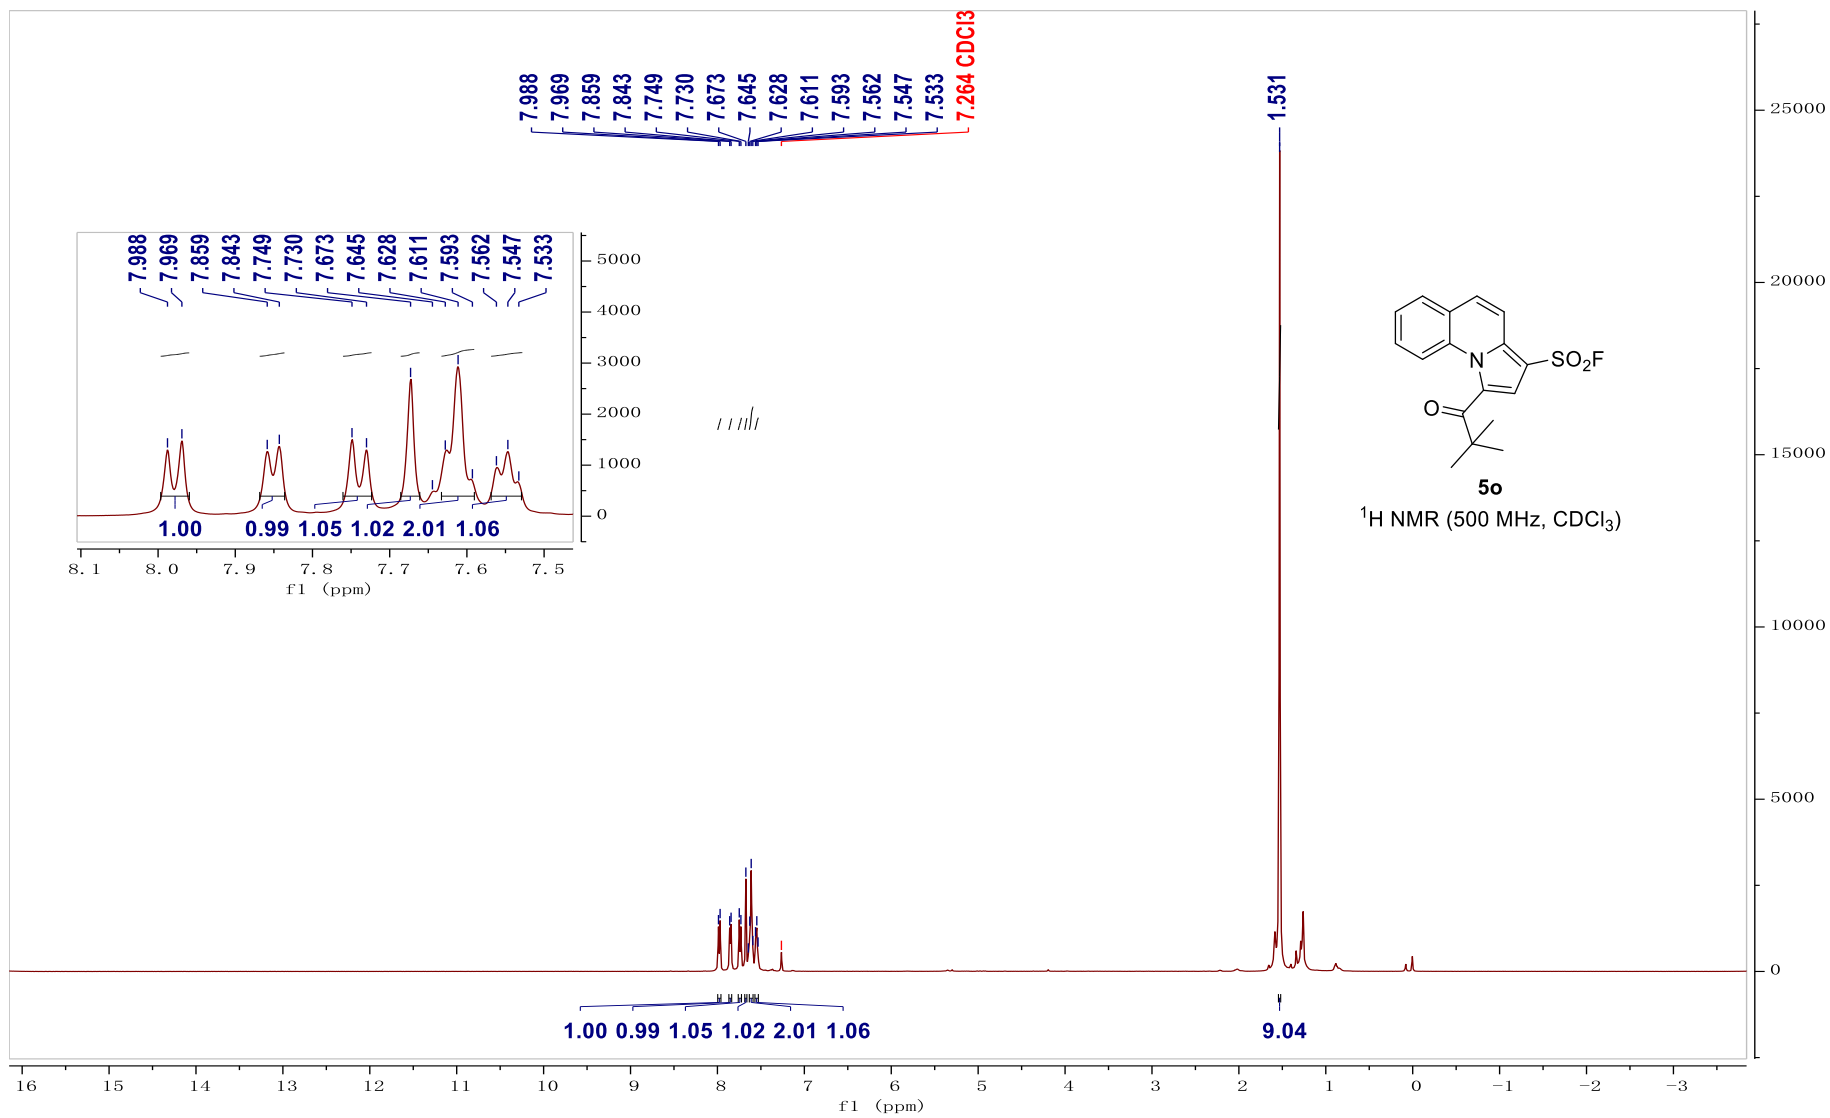

S185

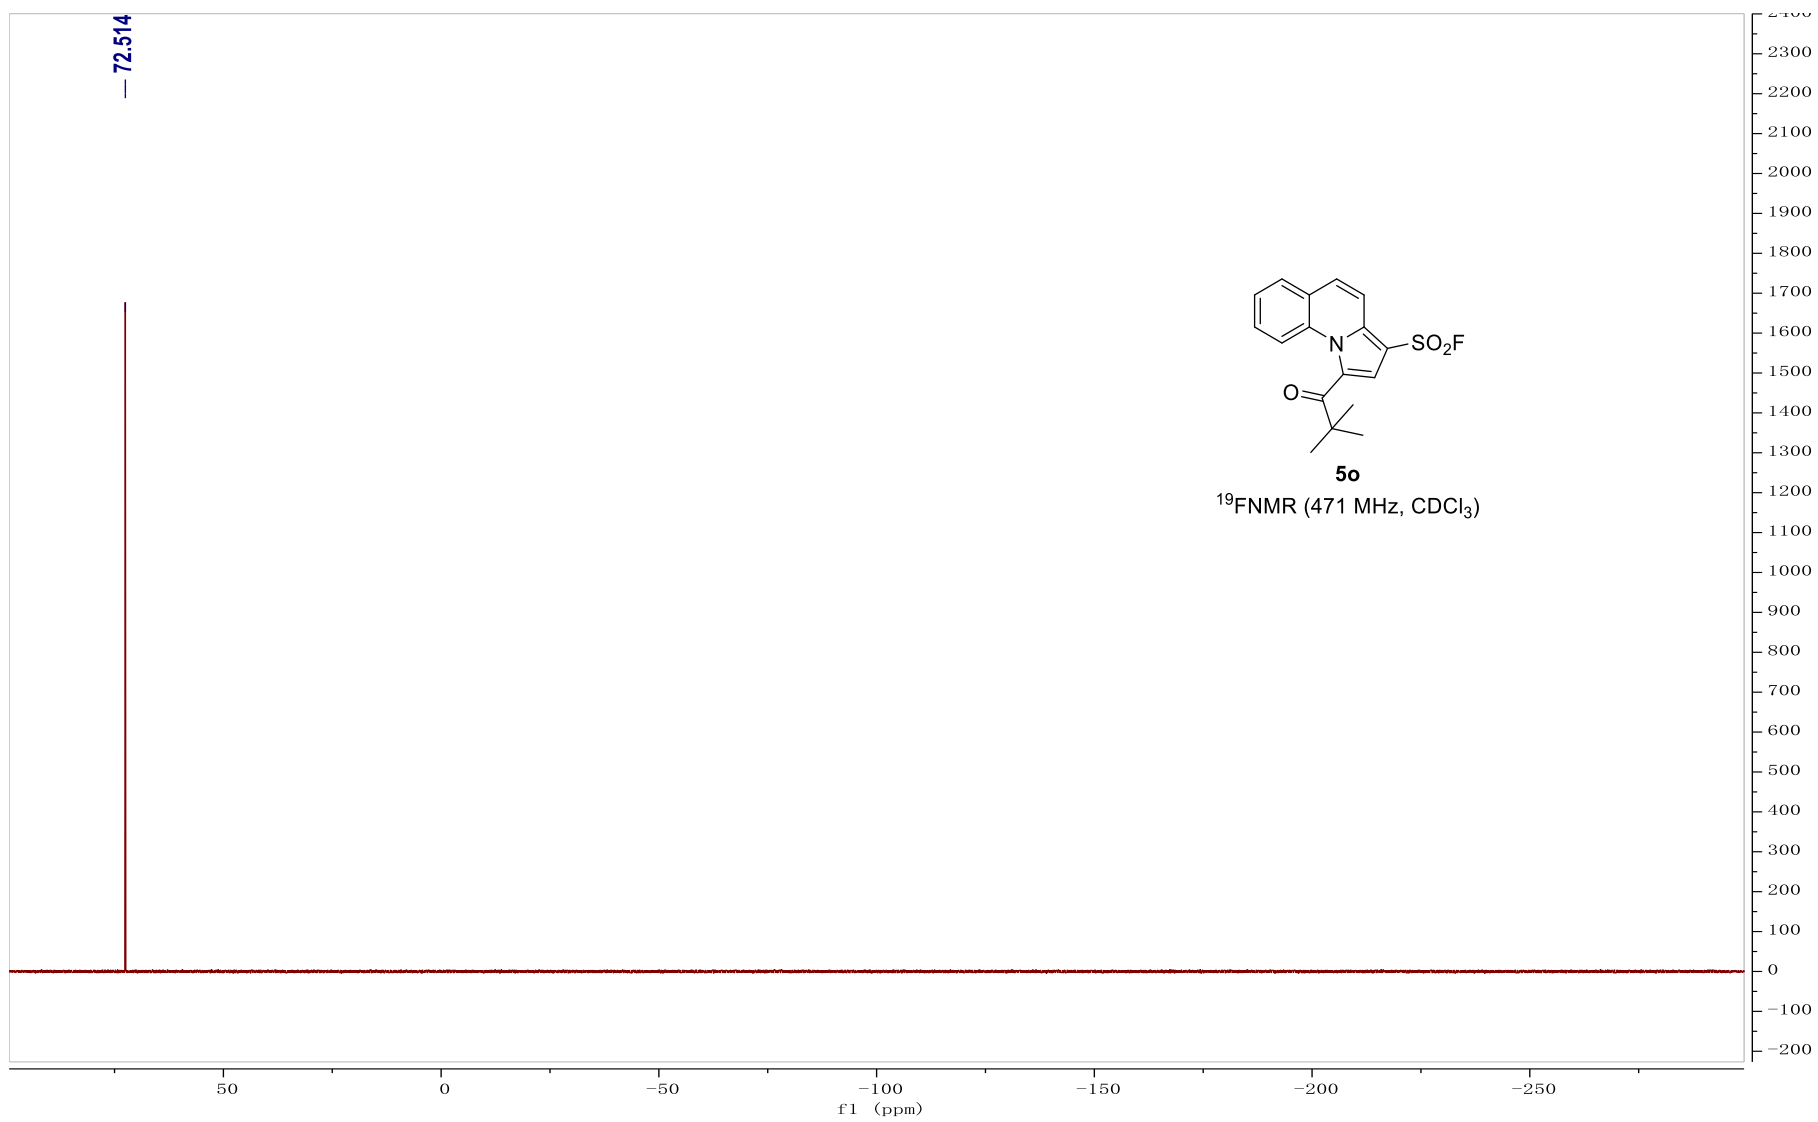

S186

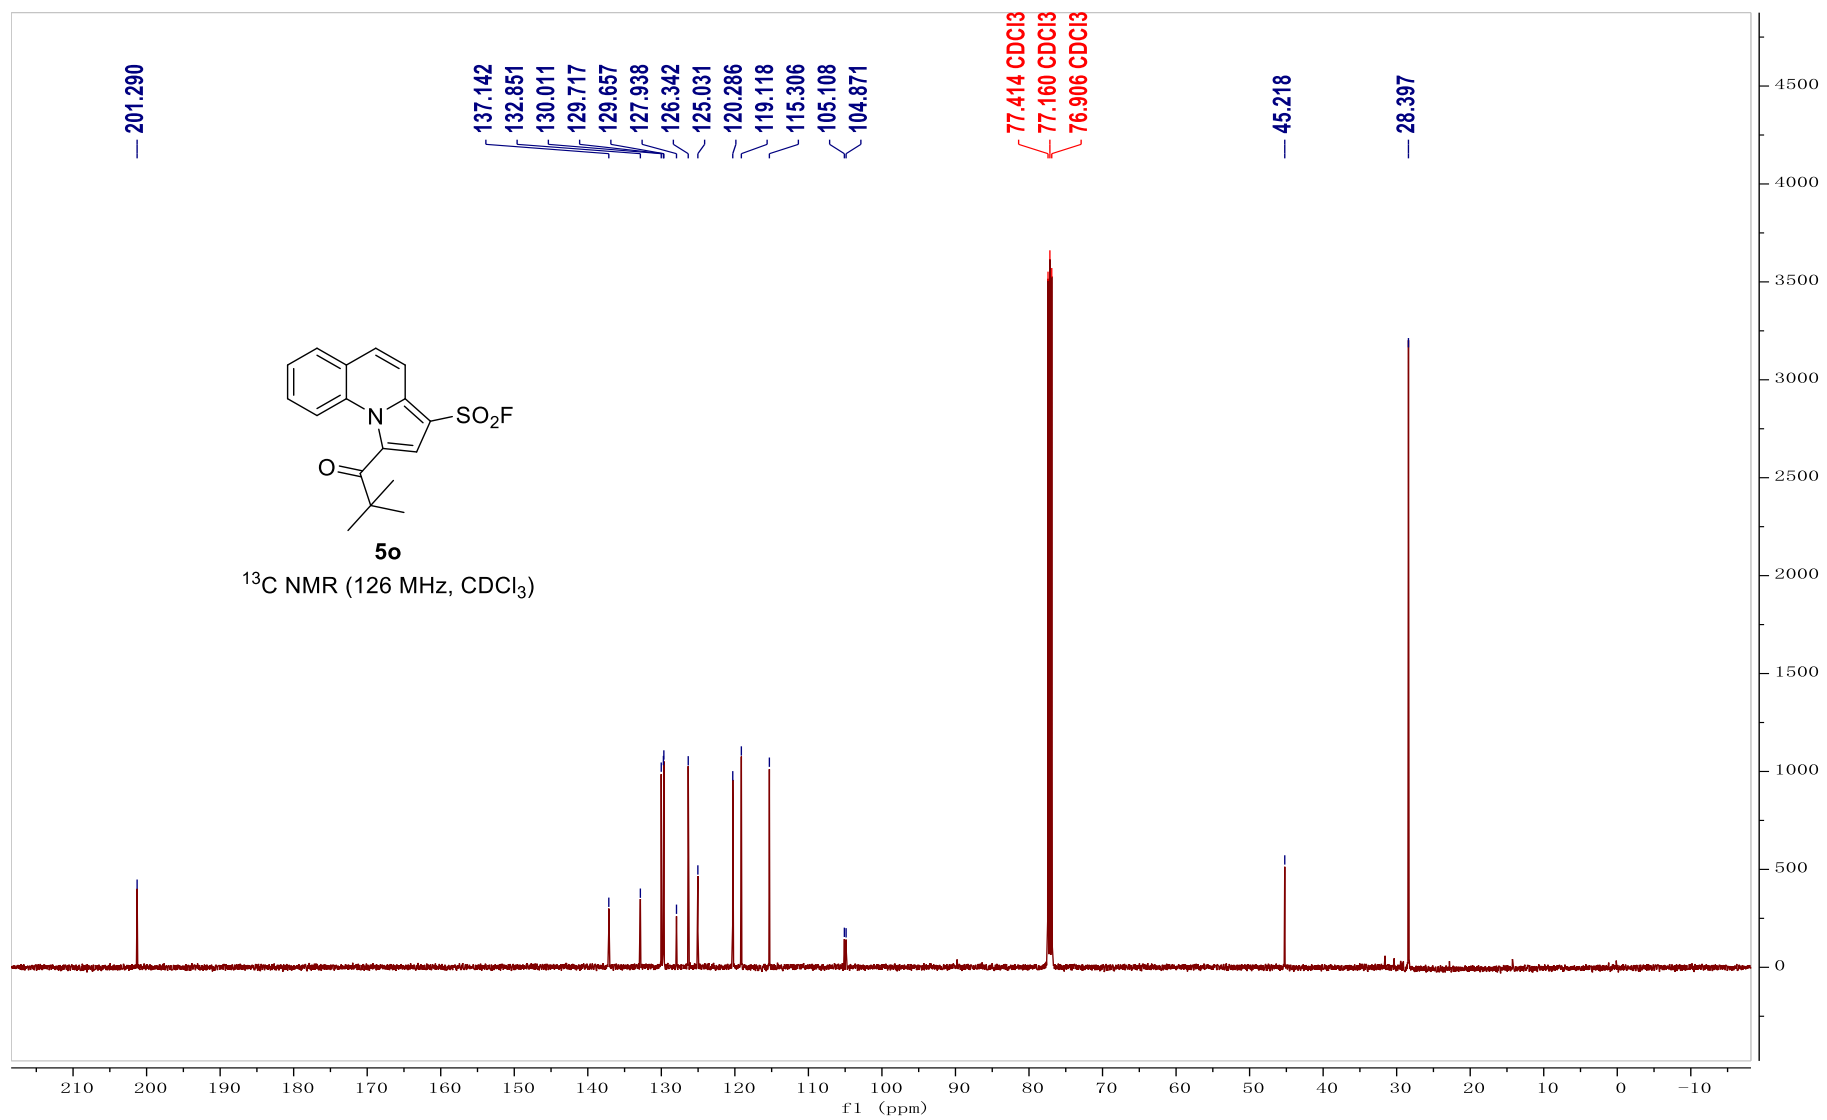

S187

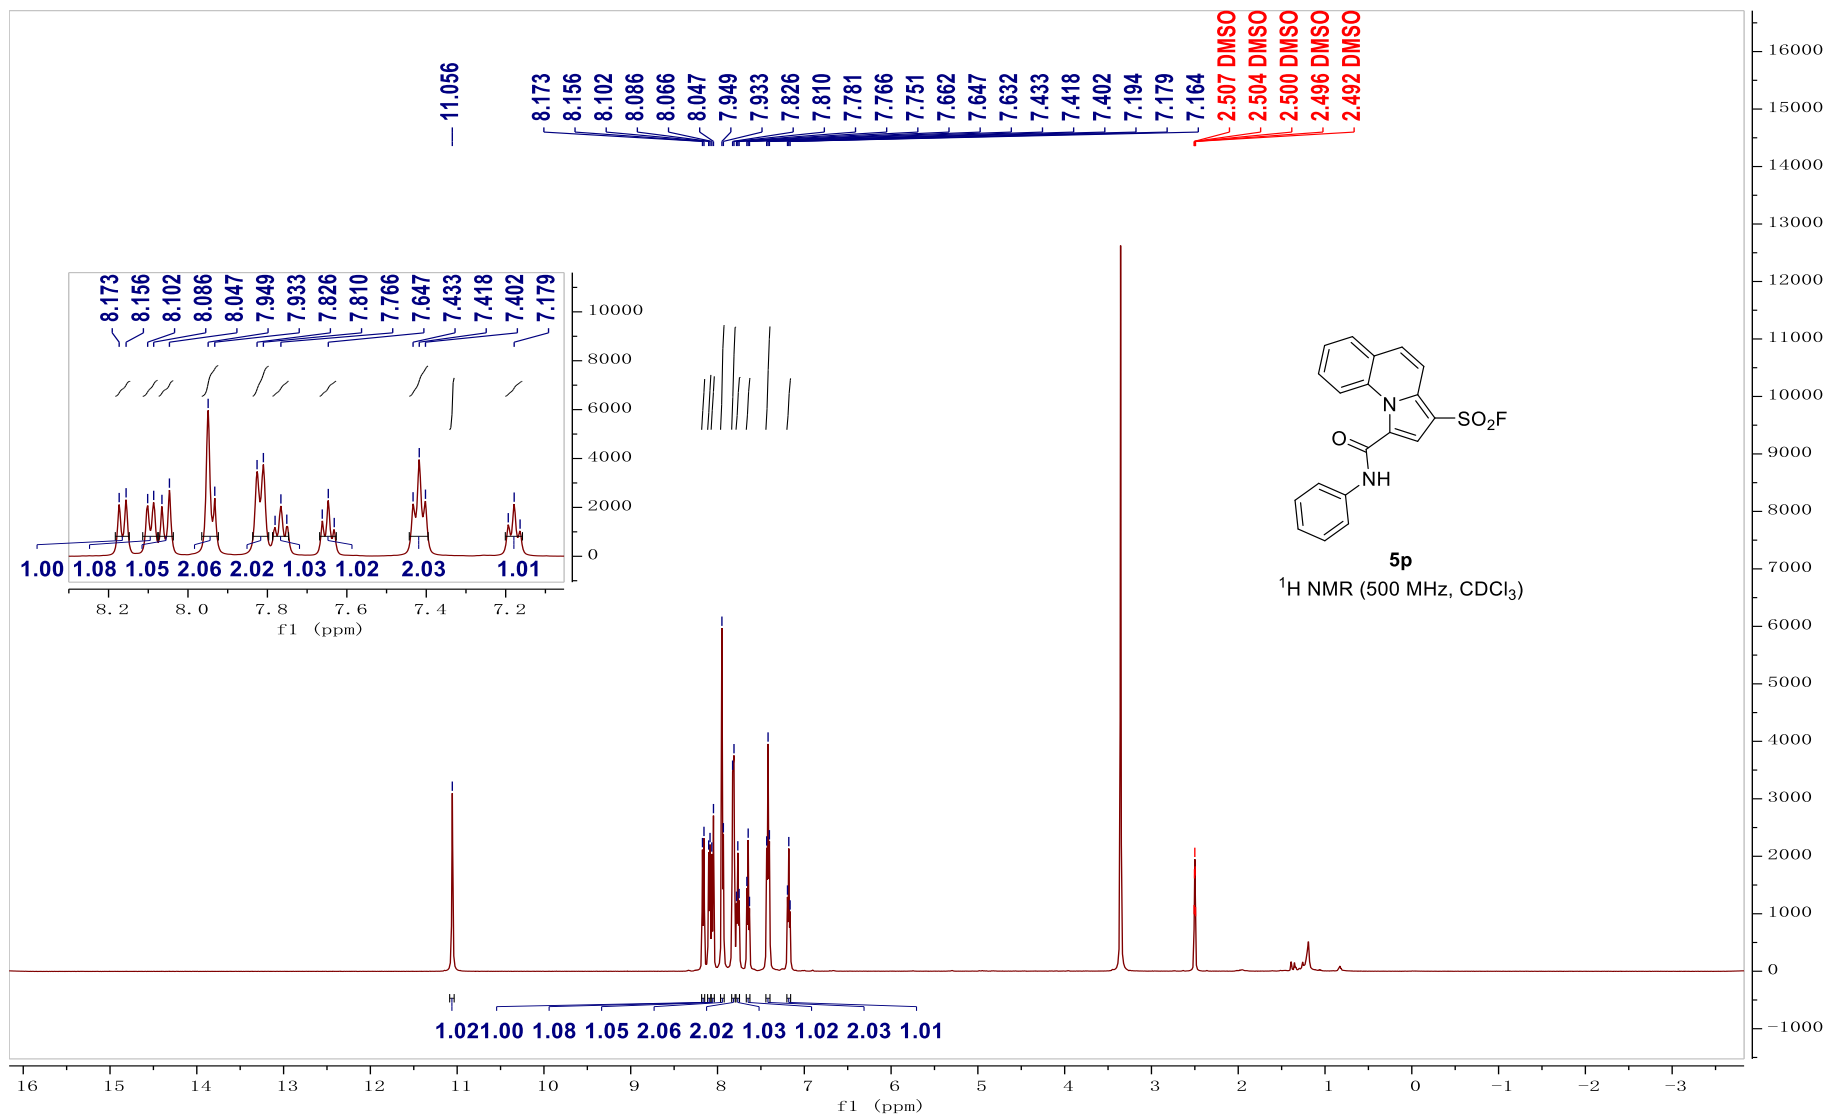

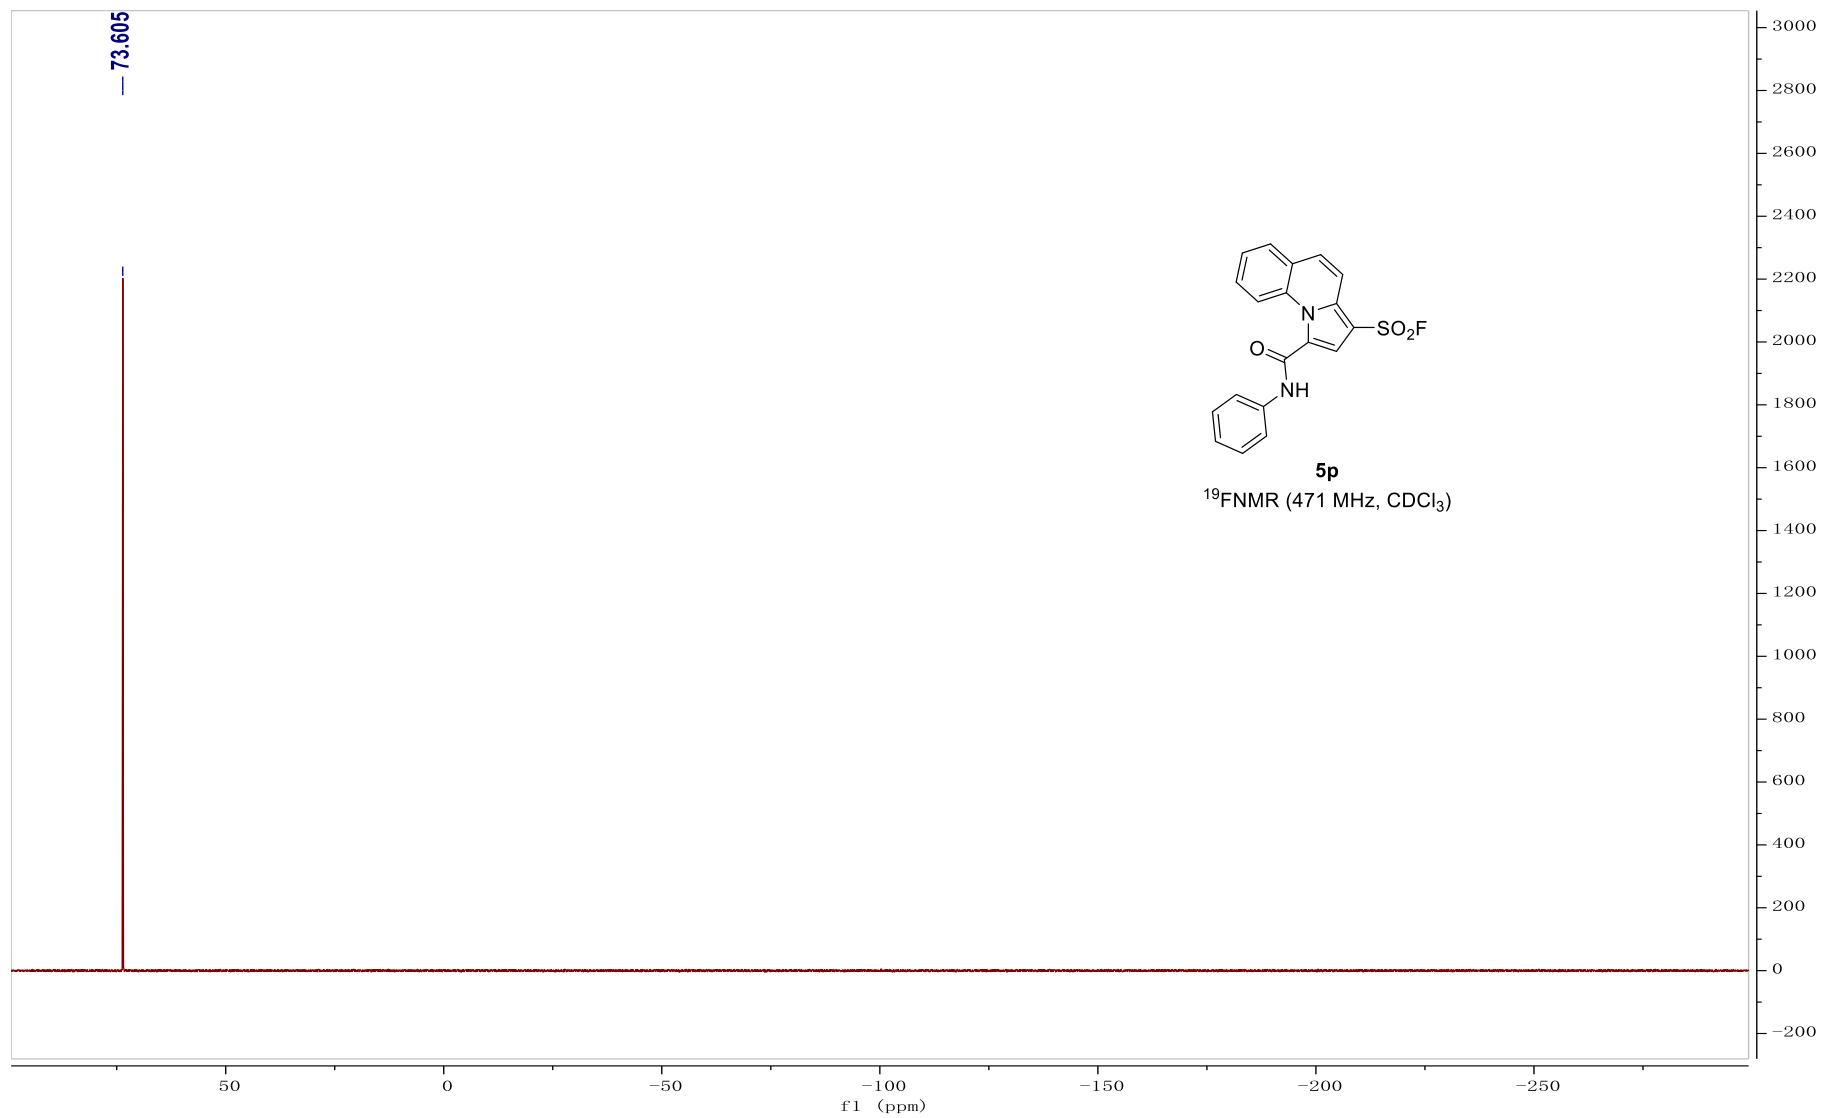

S189

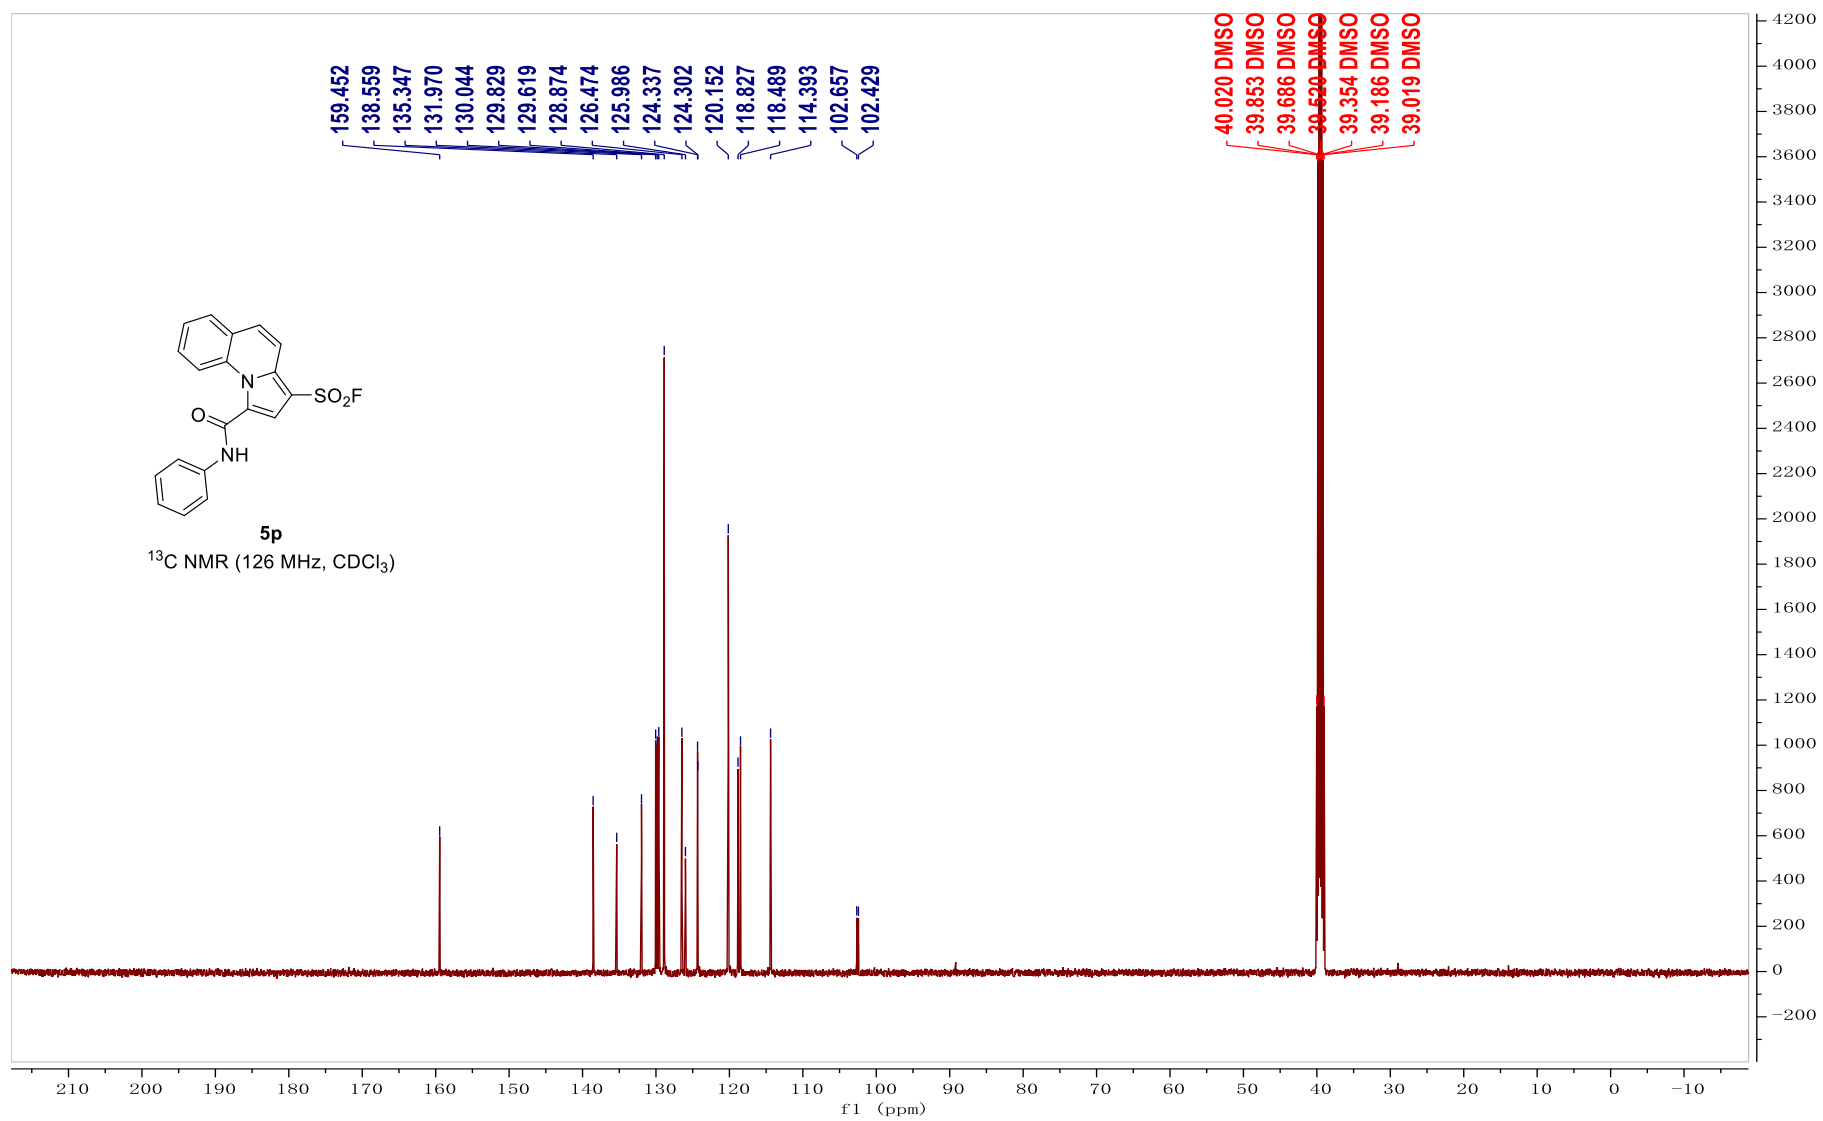

S190





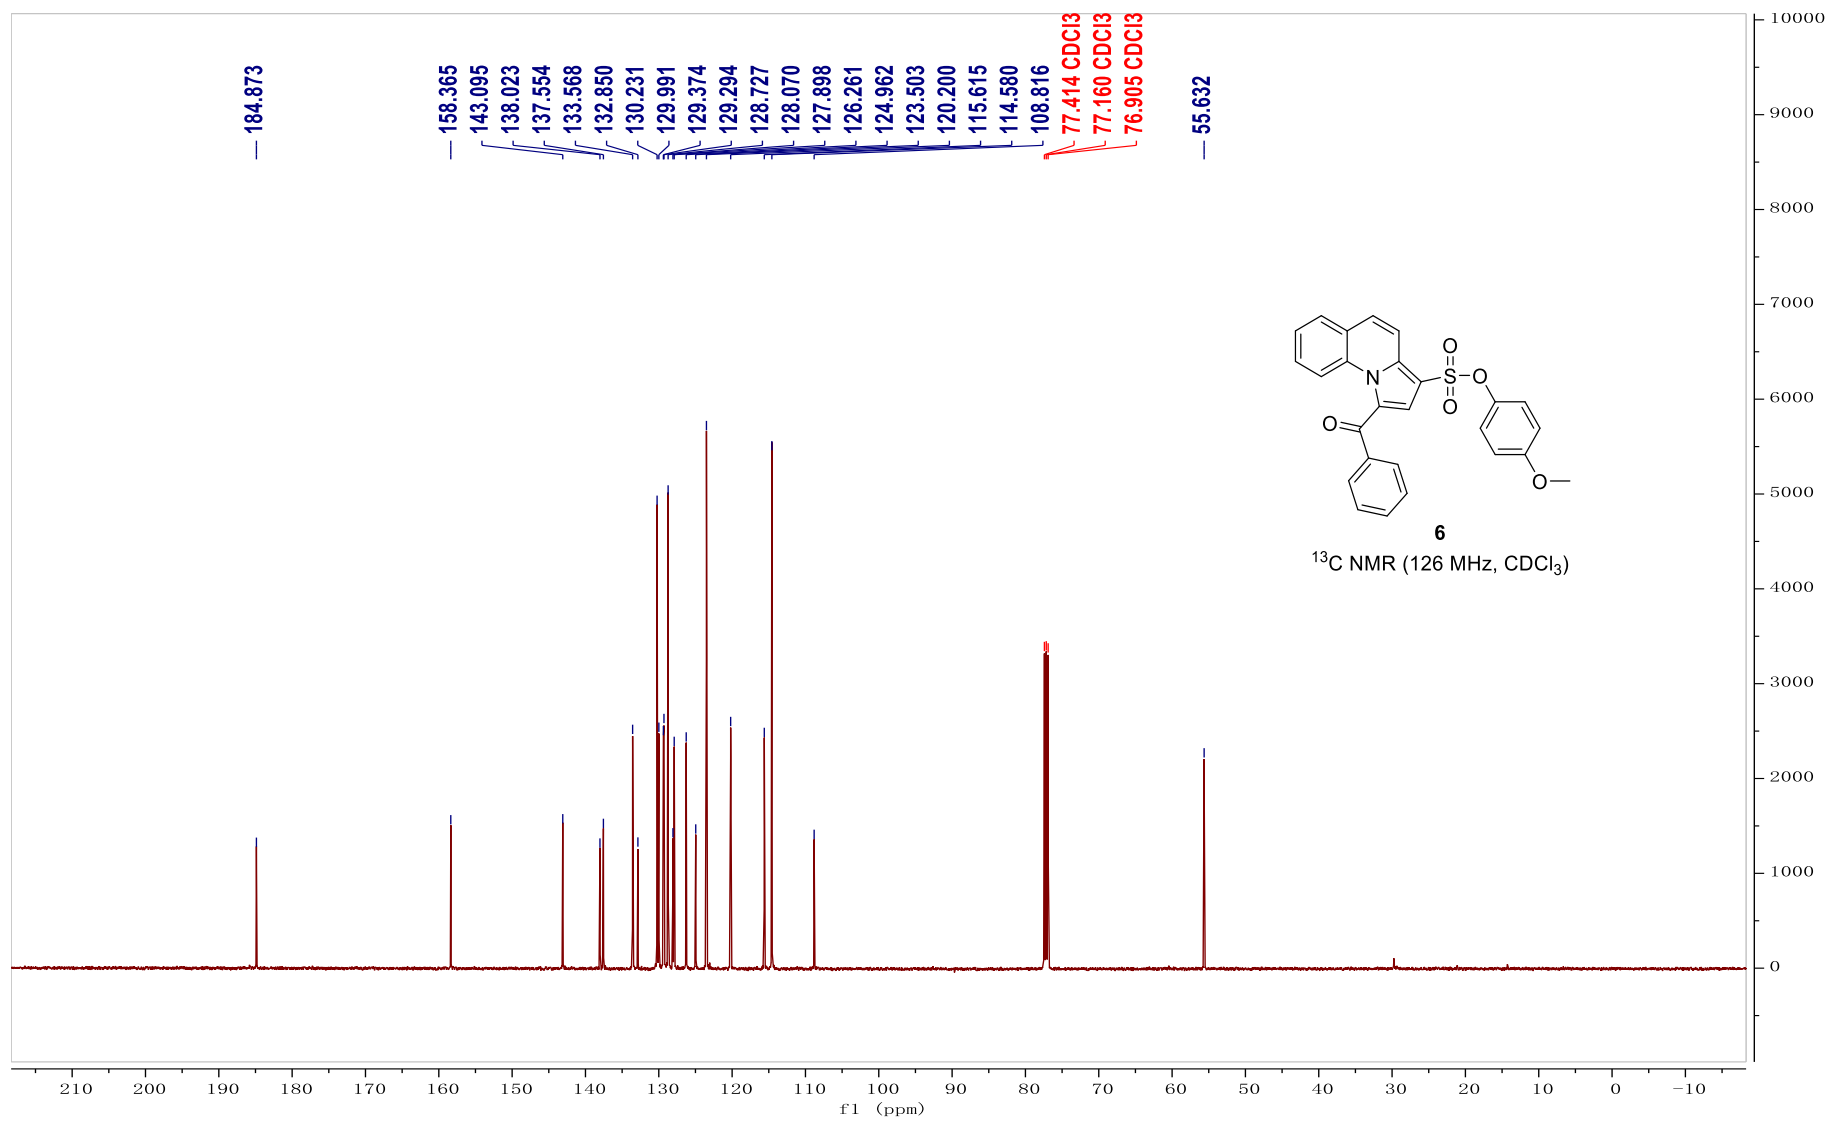

S192

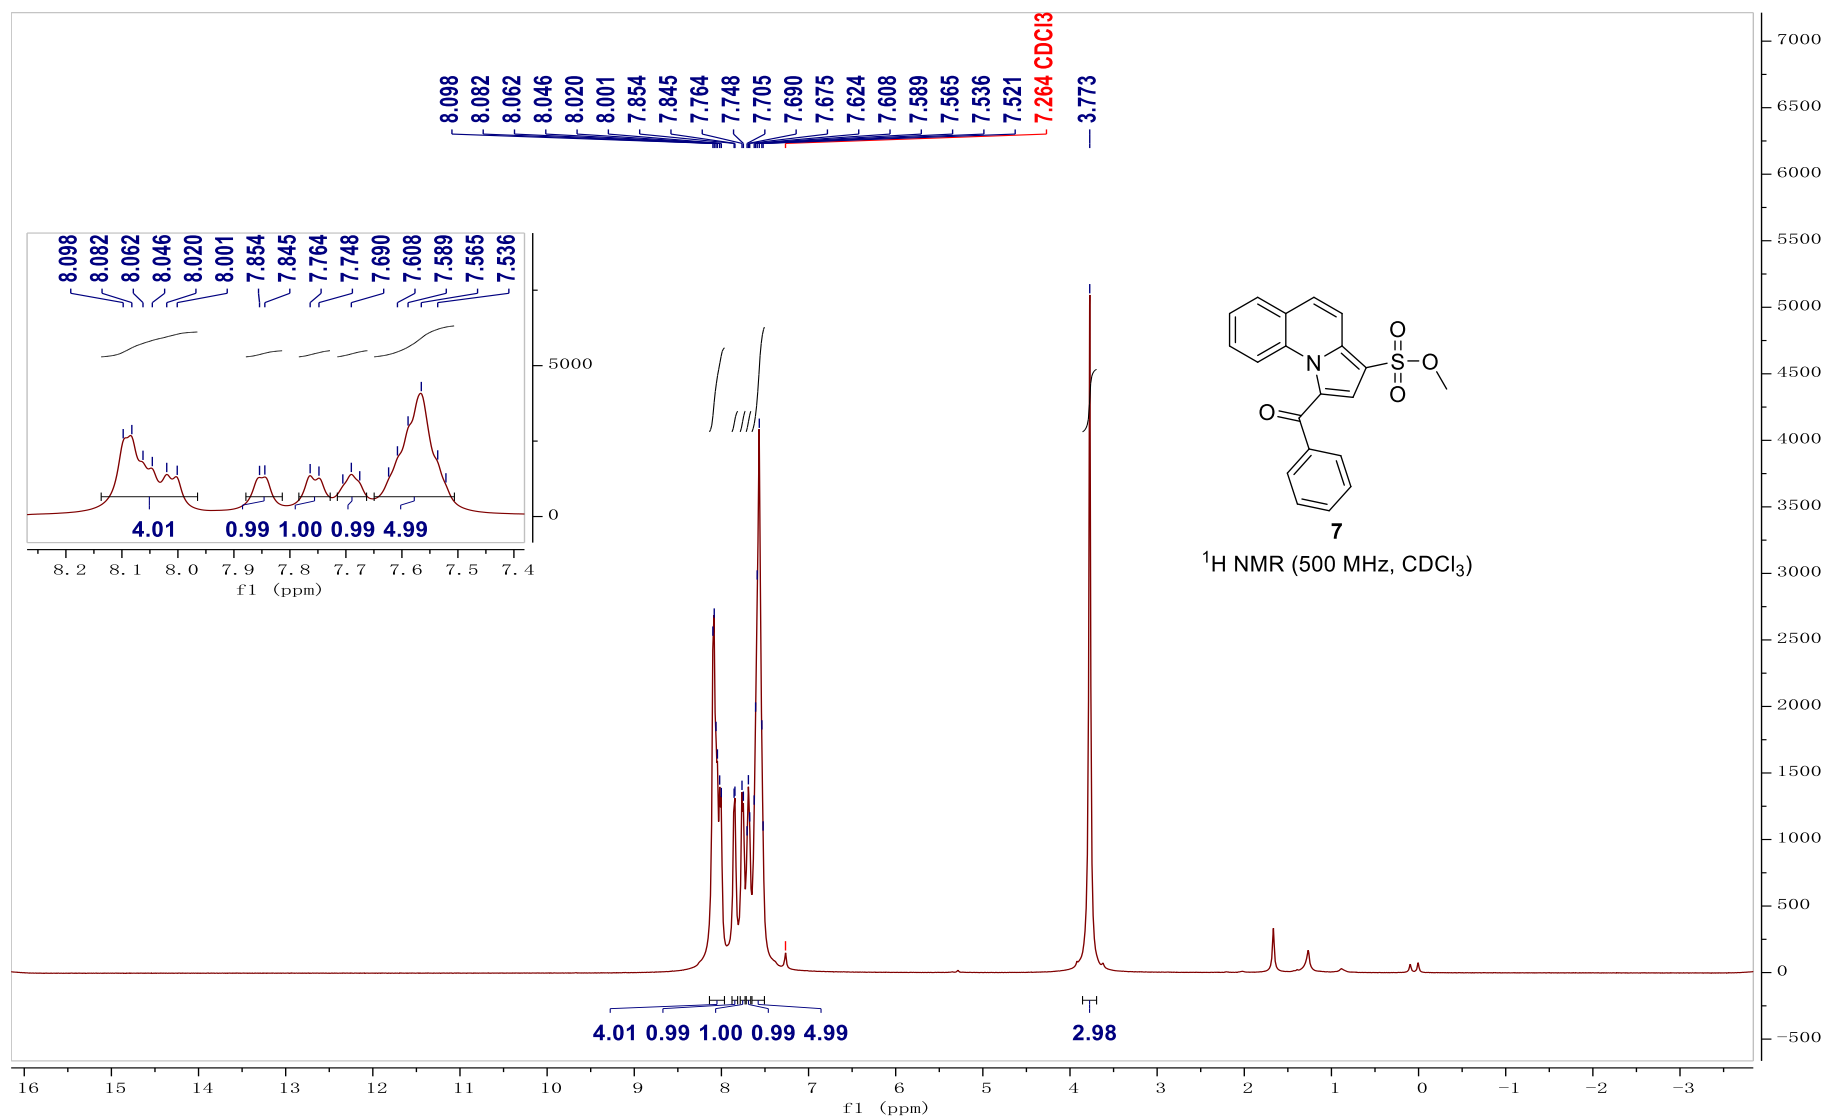

S193

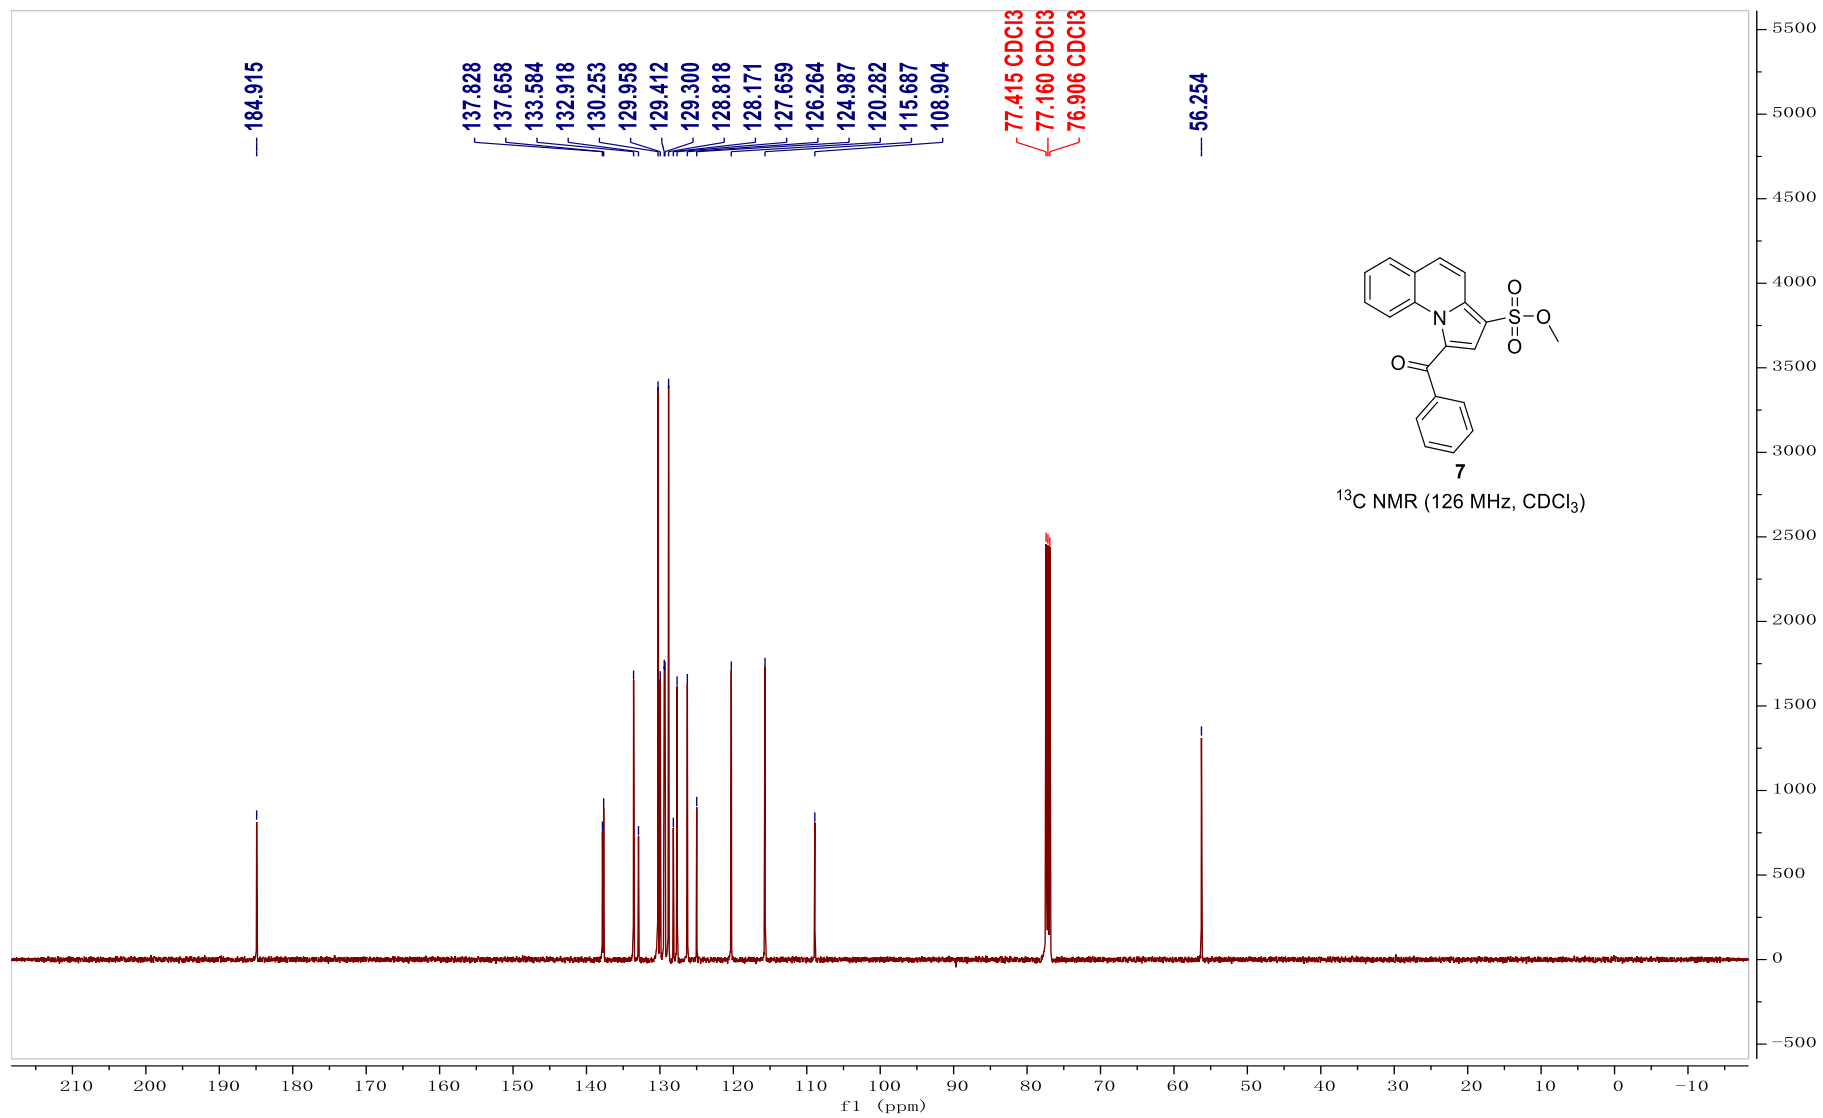

S194

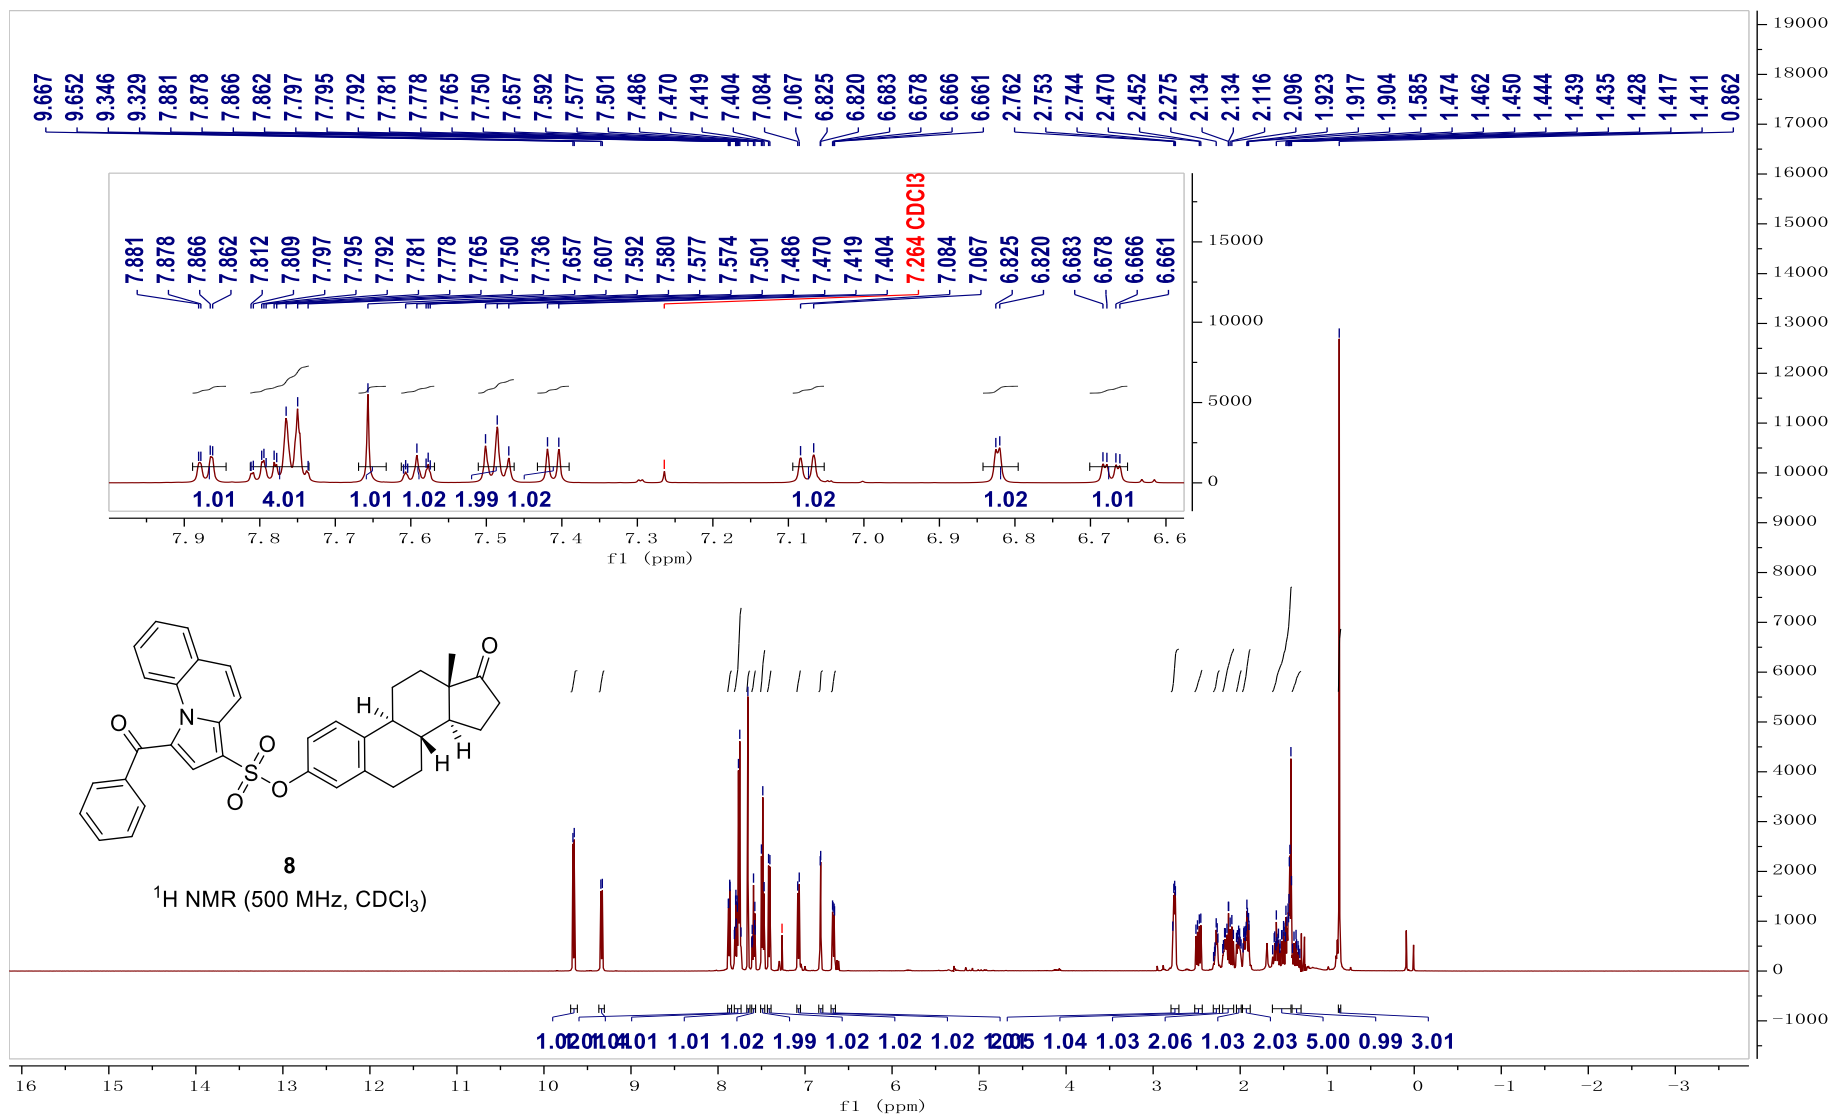

S195

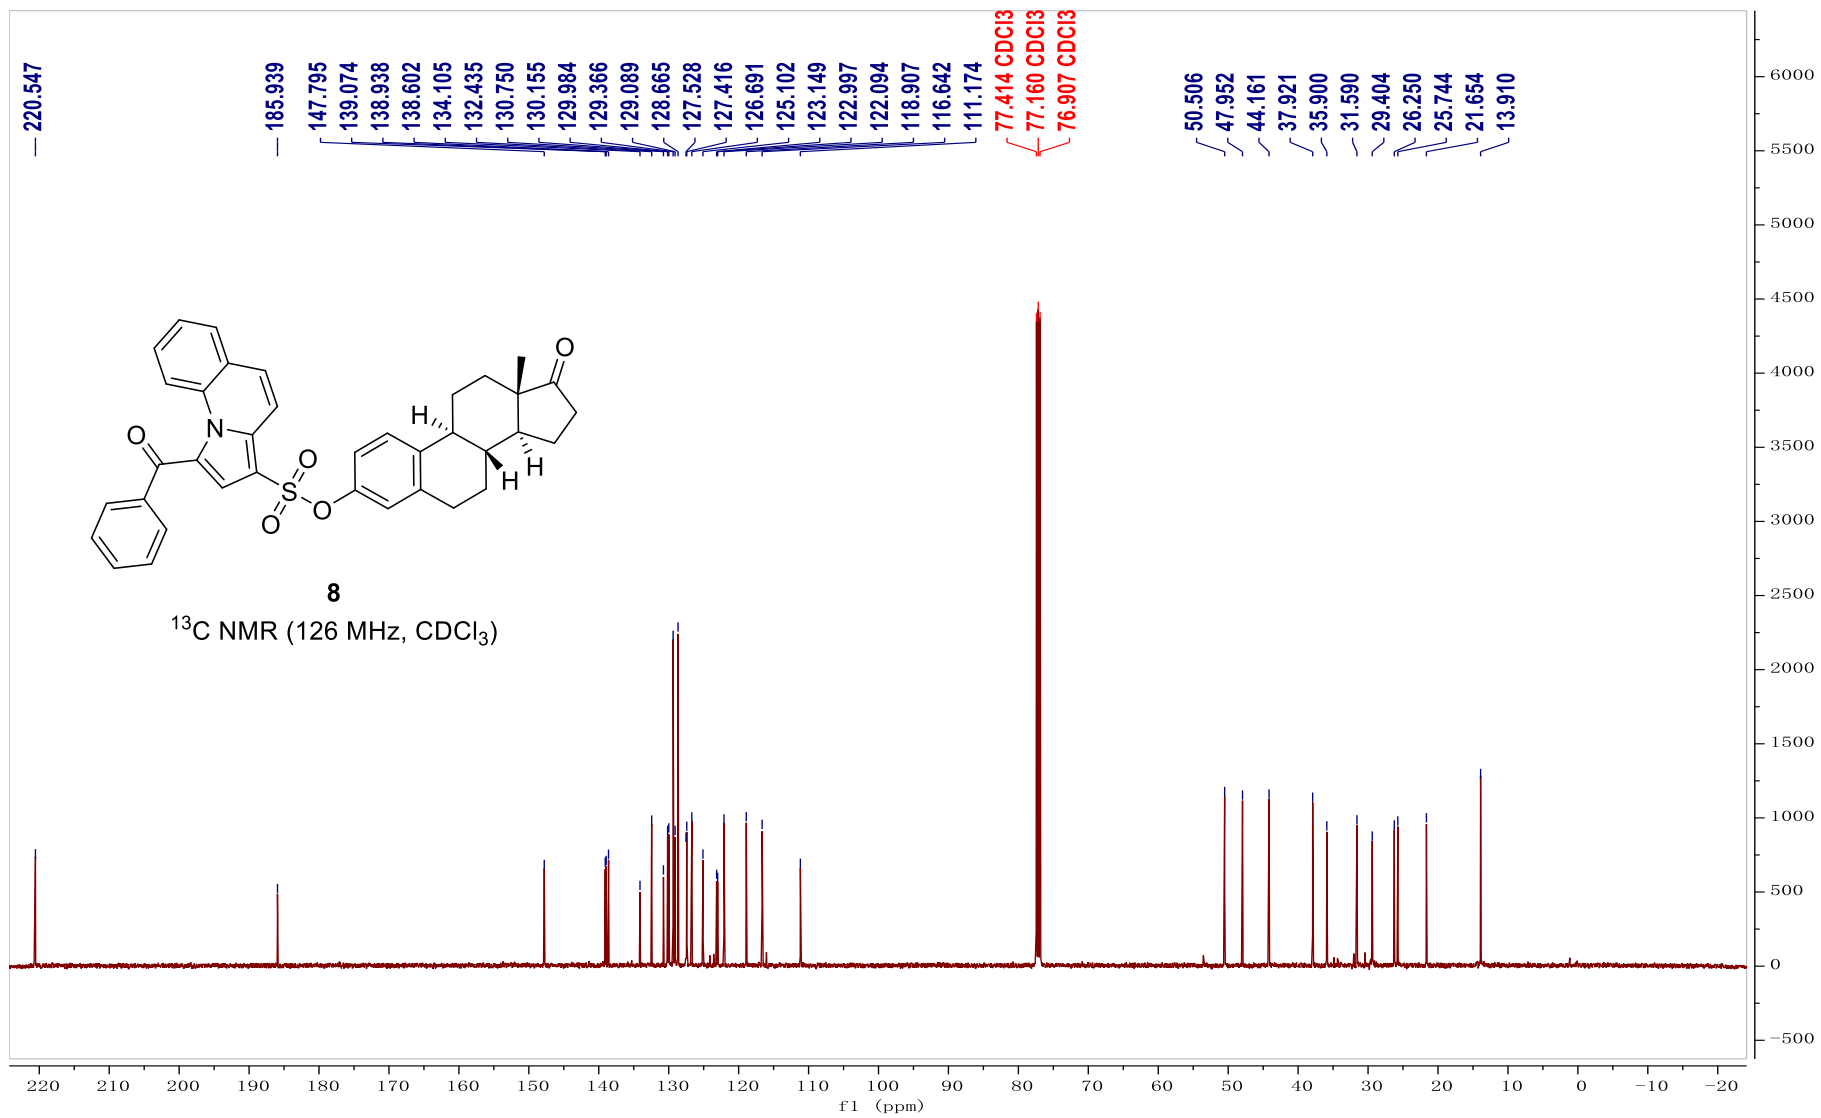

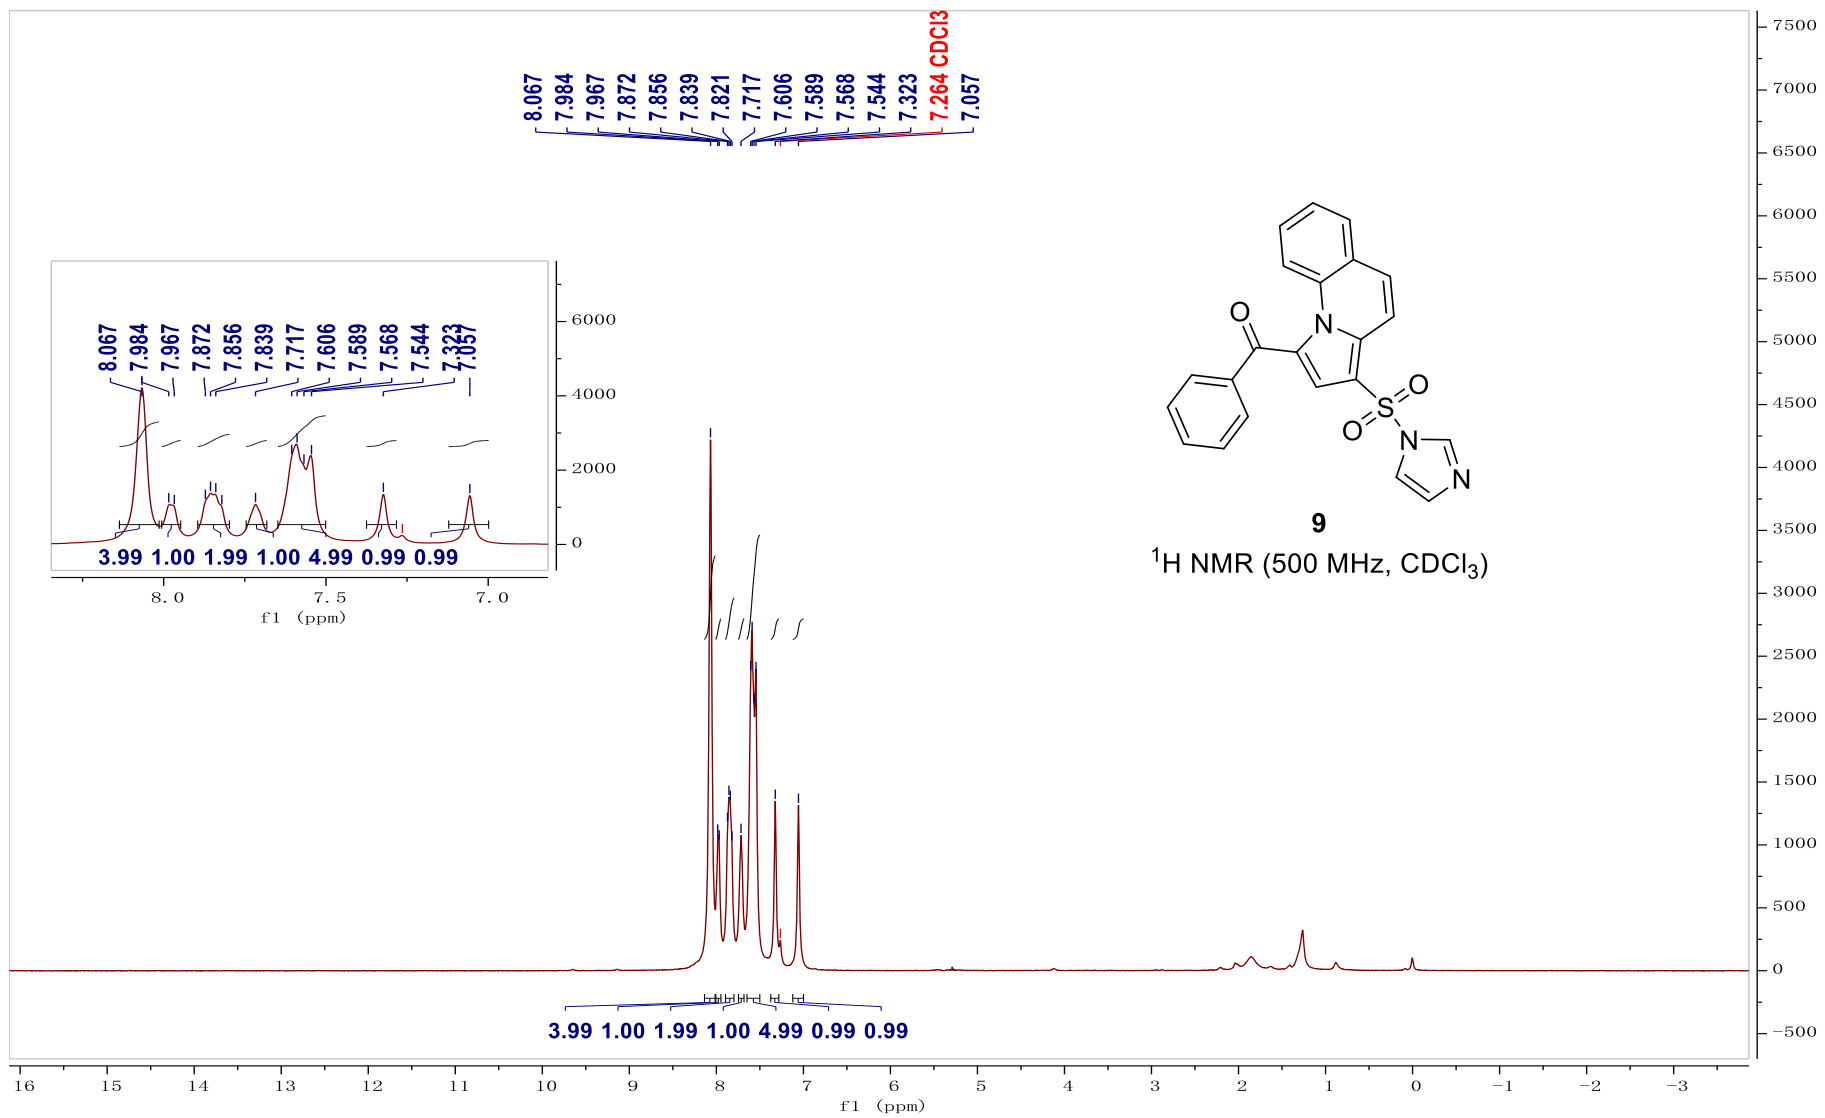

S197

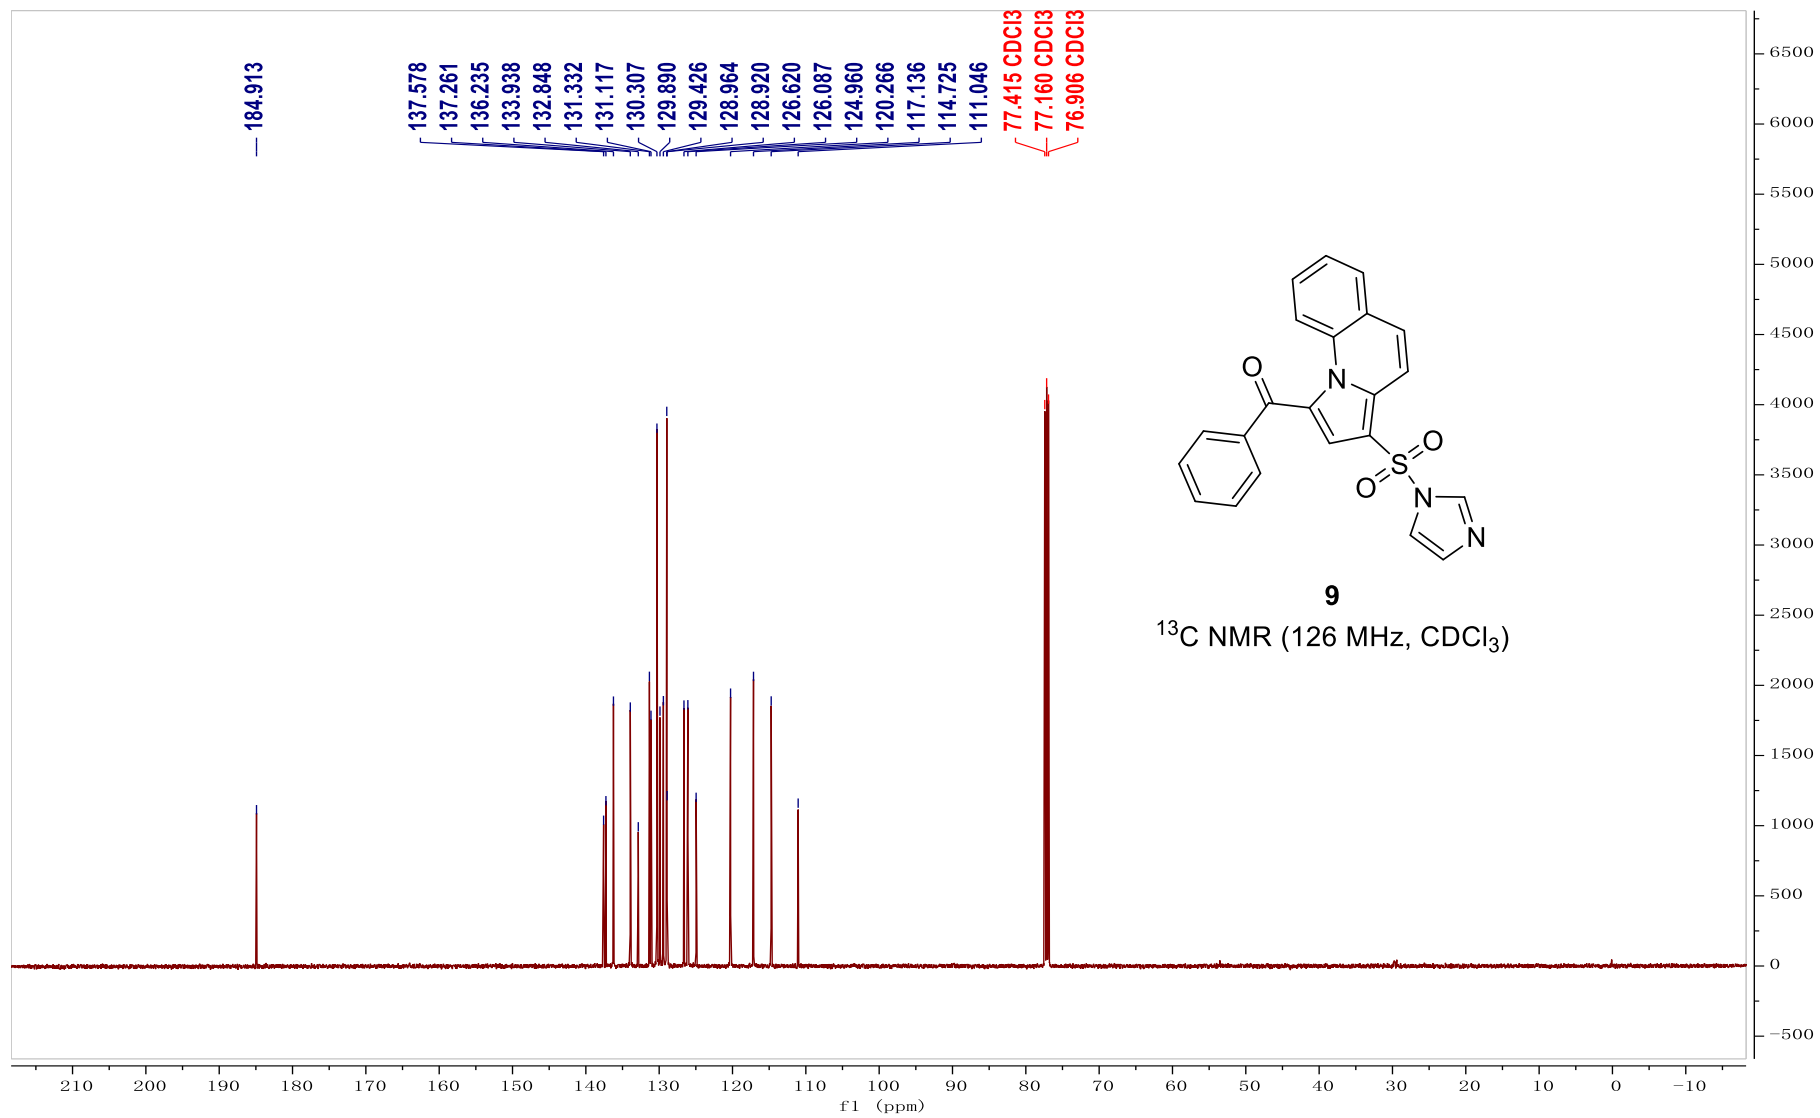

S198



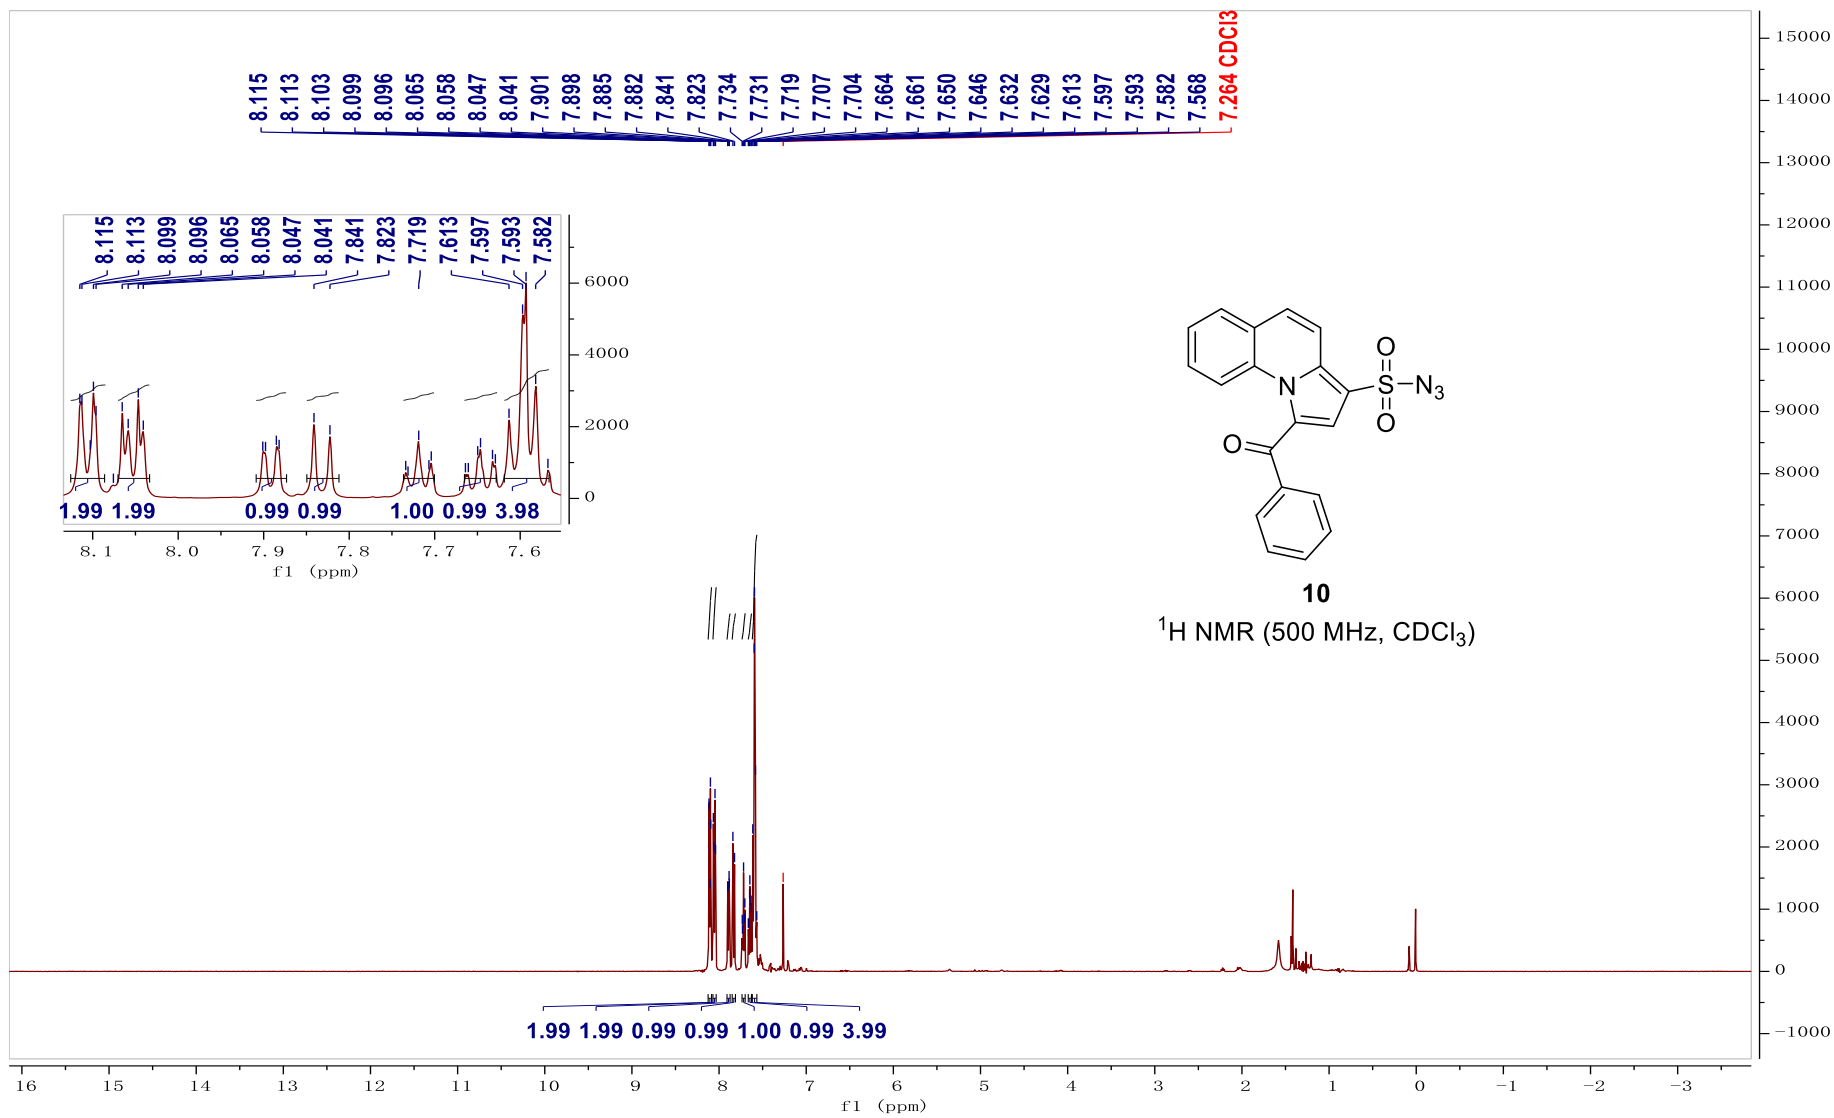

S199

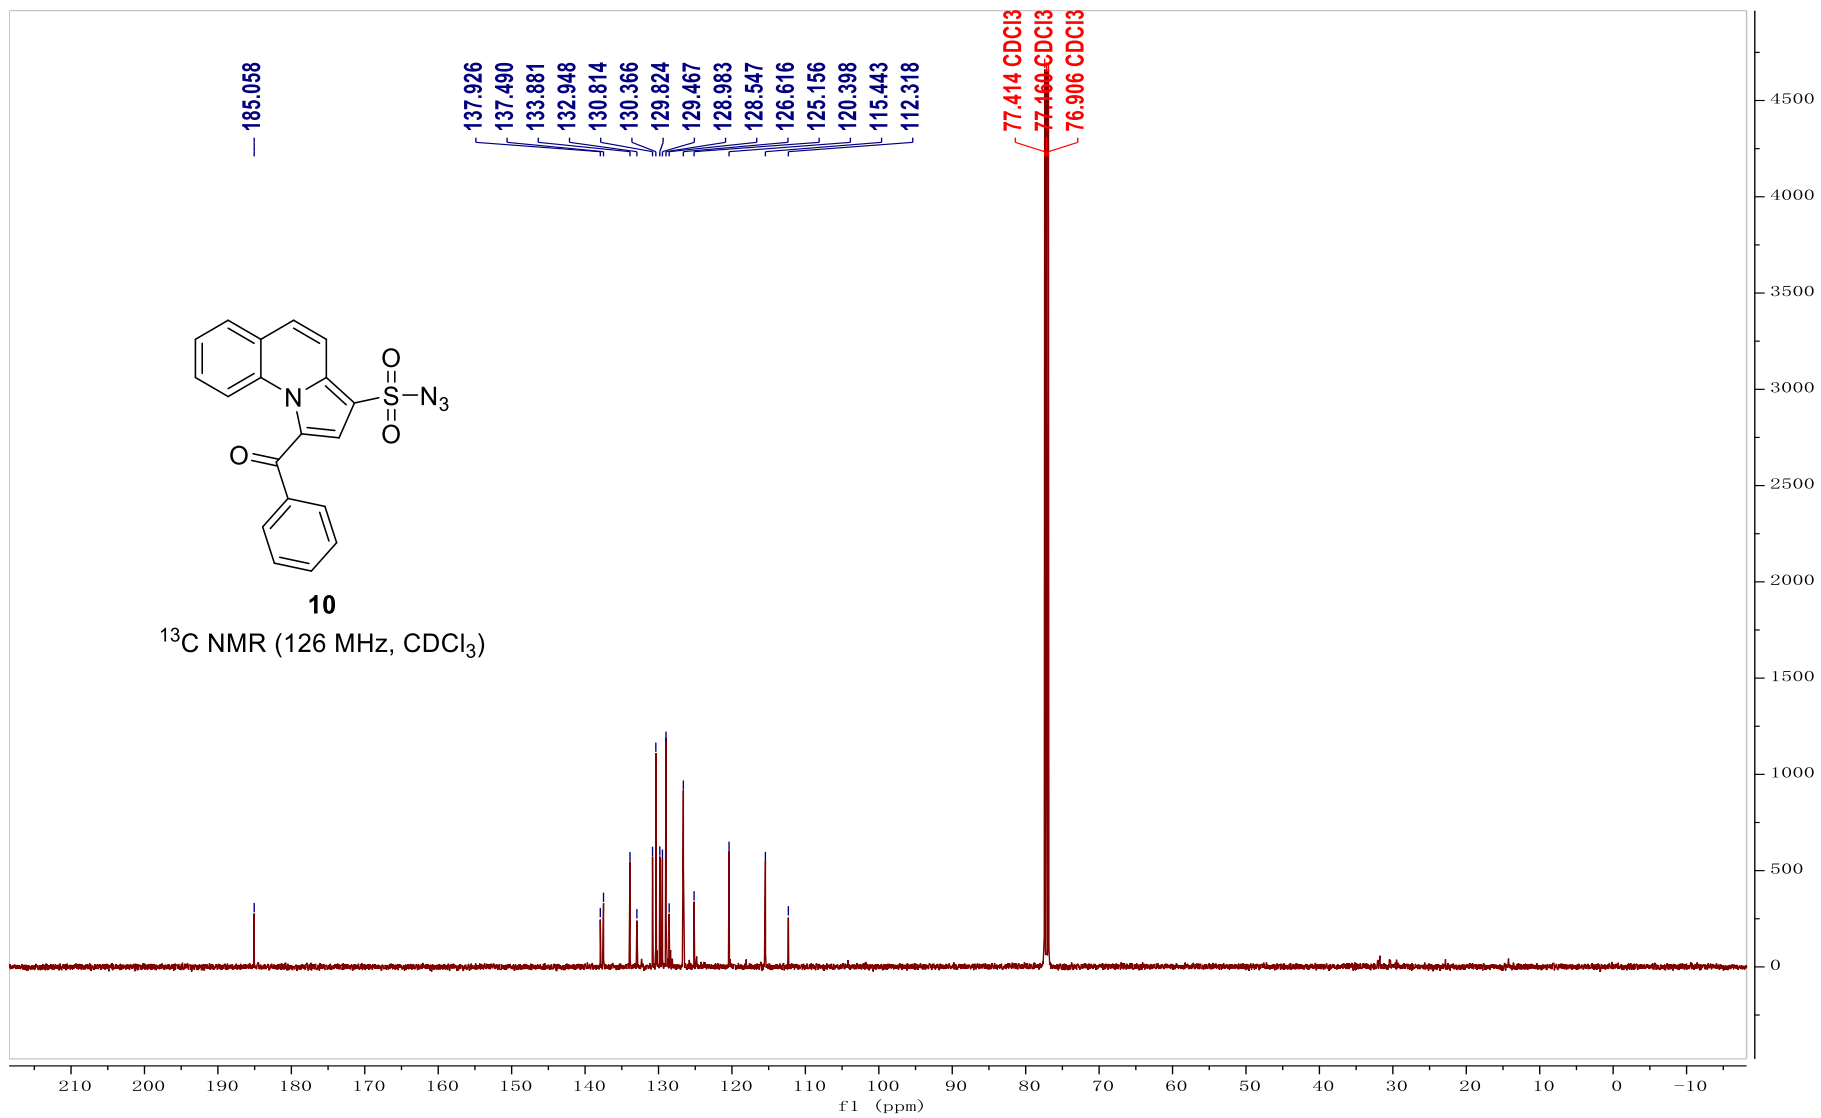

S200

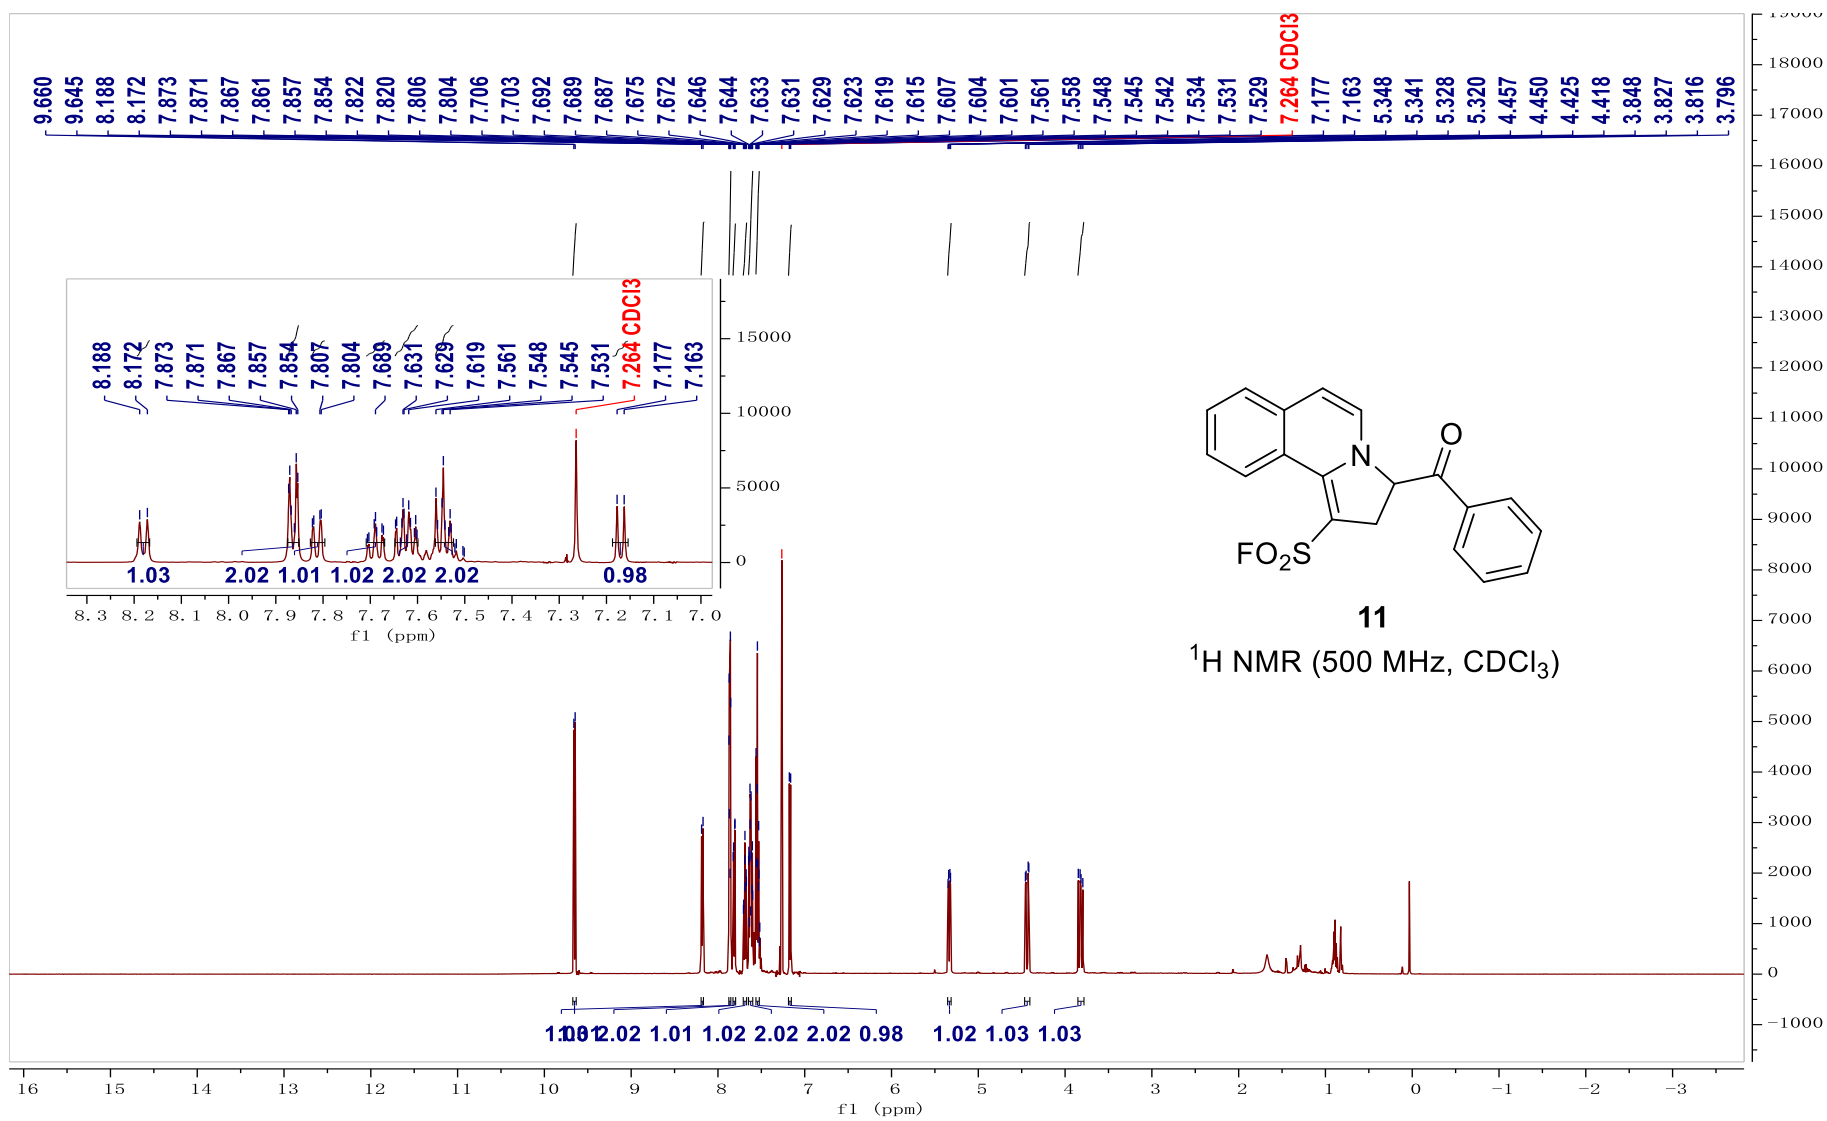

S201

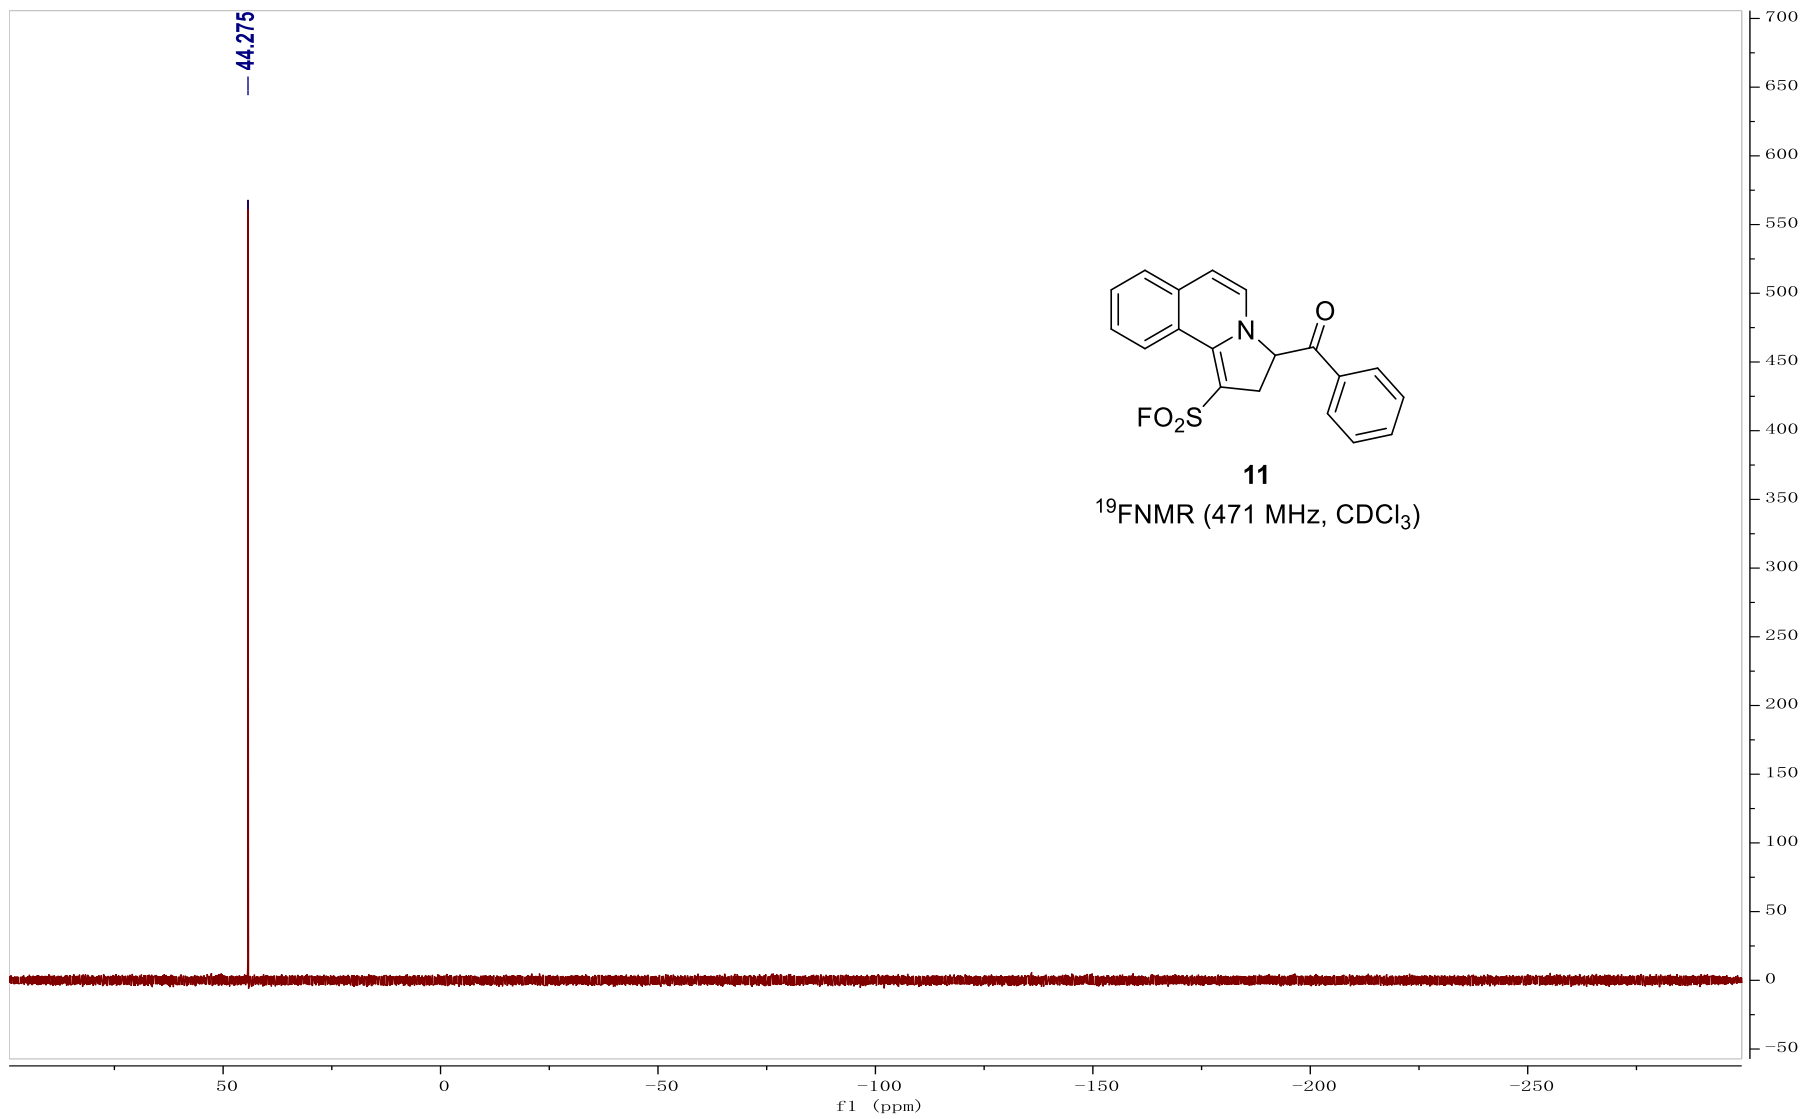

S202

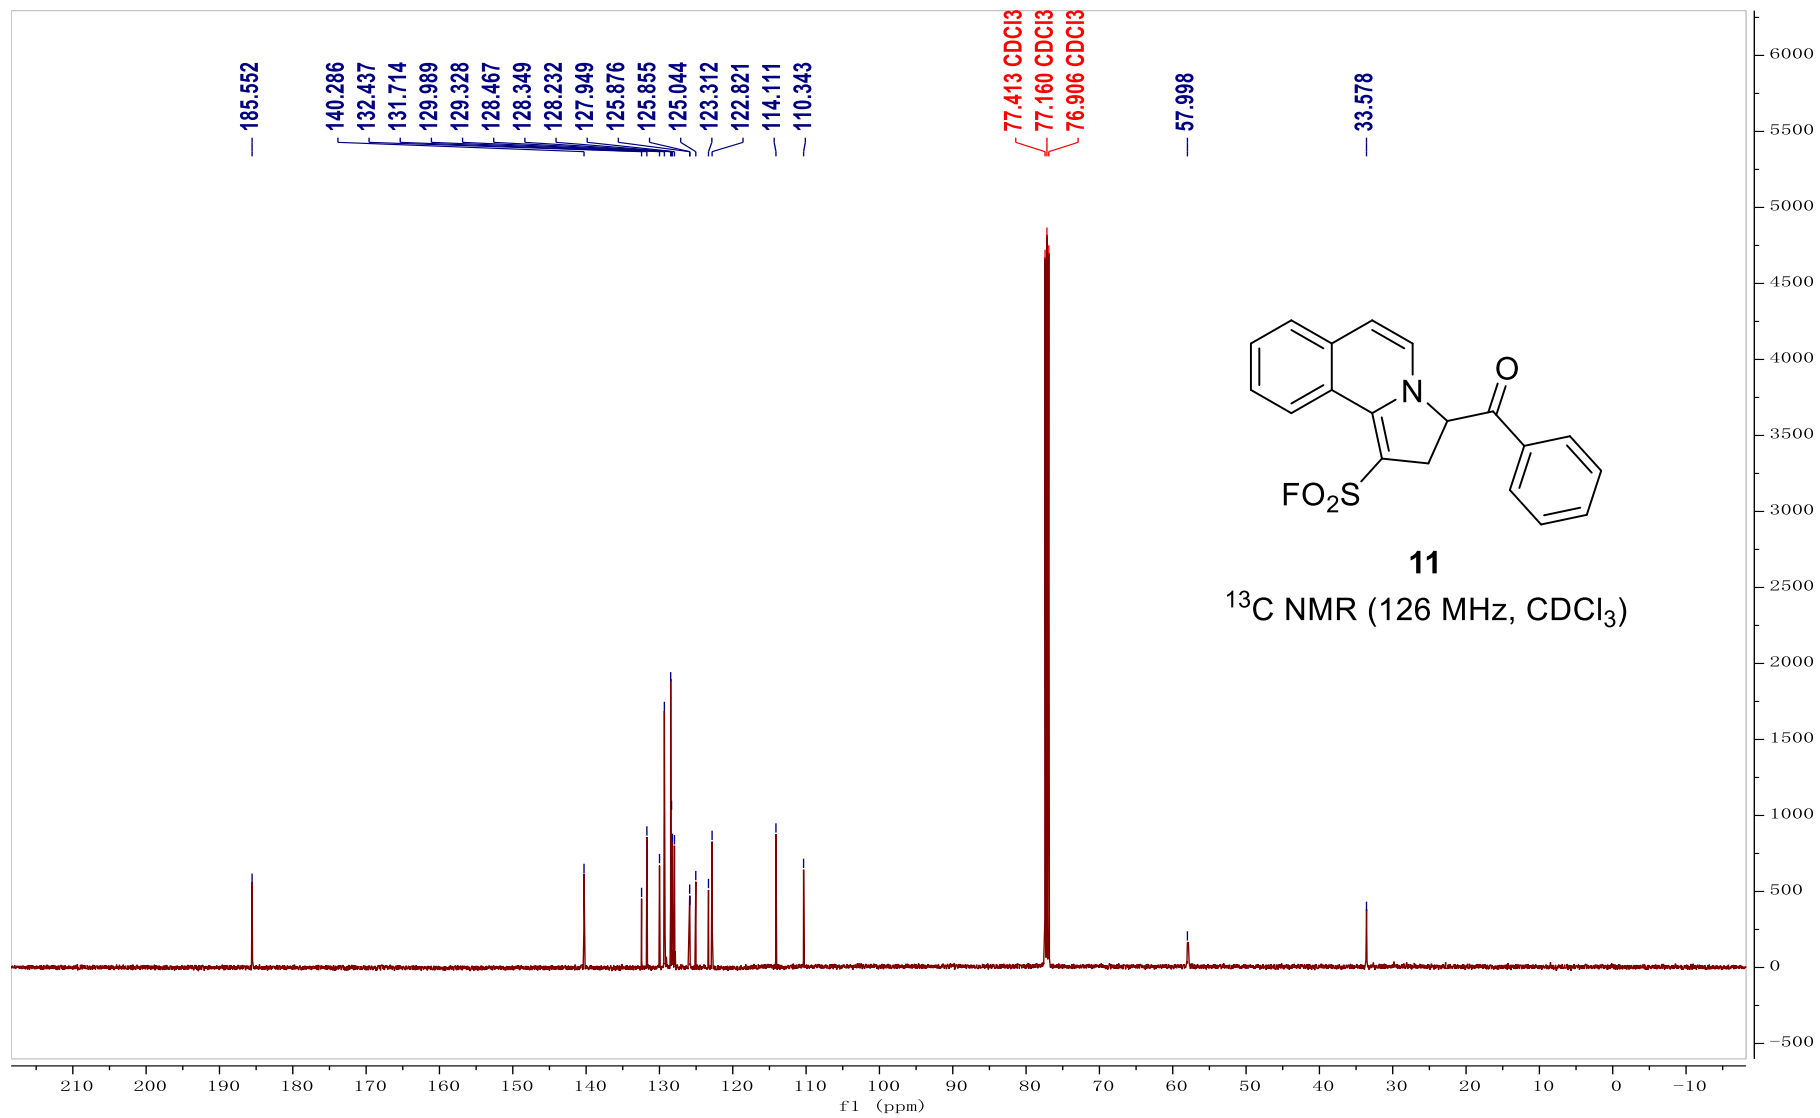

S203

## 7. Data of Crystal Structure of **5g**.

Datablock 220710e - ellipsoid plot

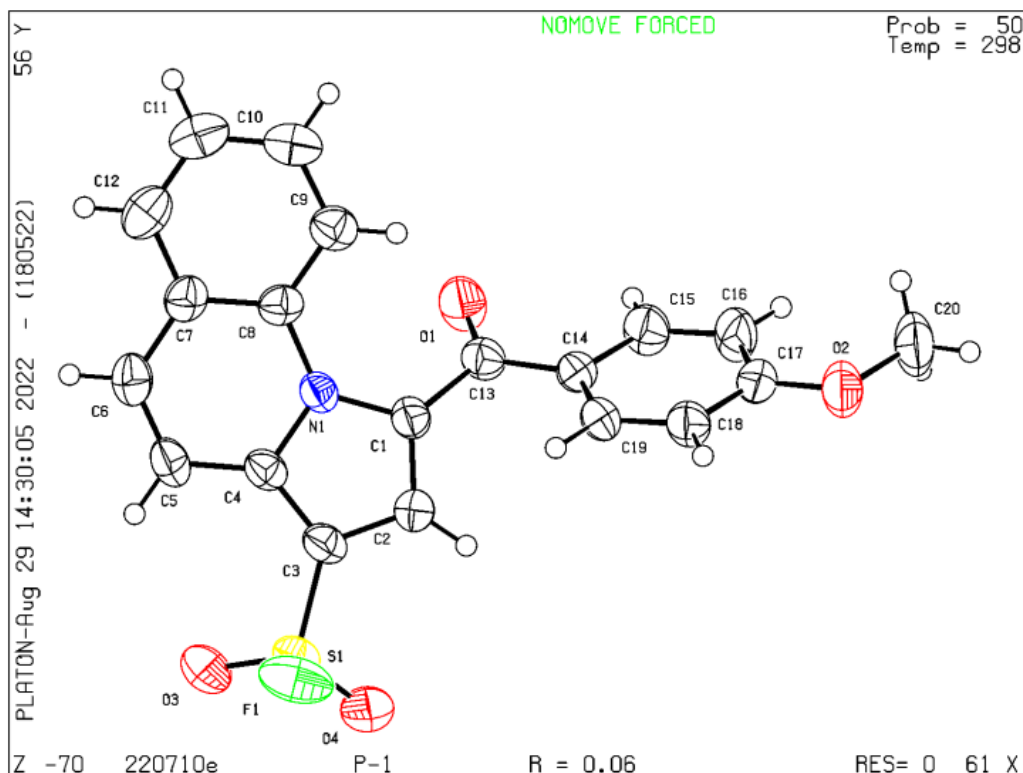

Approximately 150 mg of the purified compound **5g** was dissolved in  $\text{CHCl}_3$  and placed under dark conditions to evaporate slowly. After several days, colorless crystals were obtained. The X-ray crystal-structure determinations were obtained on a Bruker Smart-1000 CDCC diffractometer (graphite-monochromated Mo  $K\alpha$  radiation,  $\lambda=0.71073$  nm) at 293(2) K. The crystal structure has been deposited at the Cambridge Crystallographic Data Centre (CCDC 2204064).

**Table S9** Crystal data and structure refinement for 220710e

|                             |                                                  |
|-----------------------------|--------------------------------------------------|
| Identification code         | 220710e                                          |
| Empirical formula           | $\text{C}_{20}\text{H}_{14}\text{FNO}_4\text{S}$ |
| Formula weight              | 383.38                                           |
| Temperature                 | 298(2) K                                         |
| Wavelength                  | 0.71073 Å                                        |
| Crystal system, space group | Triclinic, P-1                                   |

|                                   |                                                                                                                                        |
|-----------------------------------|----------------------------------------------------------------------------------------------------------------------------------------|
| Unit cell dimensions              | a = 4.5757(4) Å    alpha = 76.640(2) deg.<br>b = 10.3900(11) Å    beta = 83.509(3) deg.<br>c = 18.9149(18) Å    gamma = 83.568(3) deg. |
| Volume                            | 865.86(14) Å <sup>3</sup>                                                                                                              |
| Z, Calculated density             | 2, 1.470 Mg/m <sup>3</sup>                                                                                                             |
| Absorption coefficient            | 0.224 mm <sup>-1</sup>                                                                                                                 |
| F(000)                            | 396                                                                                                                                    |
| Crystal size                      | 0.45 x 0.23 x 0.11 mm                                                                                                                  |
| Theta range for data collection   | 2.08 to 25.02 deg.                                                                                                                     |
| Limiting indices                  | -5 ≤ h ≤ 5, -12 ≤ k ≤ 12, -17 ≤ l ≤ 22                                                                                                 |
| Reflections collected / unique    | 4275 / 2988 [R(int) = 0.0361]                                                                                                          |
| Completeness to theta = 25.02     | 97.4 %                                                                                                                                 |
| Absorption correction             | Semi-empirical from equivalents                                                                                                        |
| Max. and min. transmission        | 0.9757 and 0.9057                                                                                                                      |
| Refinement method                 | Full-matrix least-squares on F <sup>2</sup>                                                                                            |
| Data / restraints / parameters    | 2988 / 0 / 245                                                                                                                         |
| Goodness-of-fit on F <sup>2</sup> | 1.052                                                                                                                                  |
| Final R indices [I > 2σ(I)]       | R1 = 0.0633, wR2 = 0.1493                                                                                                              |
| R indices (all data)              | R1 = 0.0922, wR2 = 0.1613                                                                                                              |
| Largest diff. peak and hole       | 0.253 and -0.377 e.Å <sup>-3</sup>                                                                                                     |

**Table S10** Atomic coordinates ( $\times 10^4$ ) and equivalent isotropic displacement parameters ( $\text{\AA}^2 \times 10^3$ ) for 220710e.

U(eq) is defined as one third of the trace of the orthogonalized  $U_{ij}$  tensor.

|       | x        | y       | z       | U(eq) |
|-------|----------|---------|---------|-------|
| S(1)  | -3136(2) | 3863(1) | 3357(1) | 47(1) |
| F(1)  | -623(5)  | 2754(2) | 3600(2) | 78(1) |
| N(1)  | 789(6)   | 7139(3) | 3028(1) | 37(1) |
| O(1)  | 469(7)   | 9120(2) | 1626(1) | 61(1) |
| O(2)  | 8072(8)  | 6697(3) | -867(2) | 72(1) |
| O(3)  | -4970(6) | 3898(3) | 4004(2) | 71(1) |
| O(4)  | -4197(7) | 3511(3) | 2759(2) | 66(1) |
| C(1)  | 1097(8)  | 6912(3) | 2311(2) | 41(1) |
| C(2)  | -129(8)  | 5750(3) | 2342(2) | 42(1) |
| C(3)  | -1285(8) | 5268(3) | 3070(2) | 43(1) |
| C(4)  | -714(7)  | 6135(3) | 3493(2) | 40(1) |
| C(5)  | -1428(8) | 6171(4) | 4238(2) | 48(1) |
| C(6)  | -538(9)  | 7158(4) | 4494(2) | 51(1) |
| C(7)  | 1246(8)  | 8139(3) | 4038(2) | 44(1) |
| C(8)  | 2035(7)  | 8097(3) | 3303(2) | 40(1) |
| C(9)  | 4033(8)  | 8948(3) | 2878(2) | 48(1) |
| C(10) | 5106(9)  | 9887(4) | 3170(3) | 59(1) |
| C(11) | 4209(10) | 9996(4) | 3884(3) | 64(1) |
| C(12) | 2387(9)  | 9106(4) | 4318(2) | 57(1) |
| C(13) | 1528(8)  | 7977(3) | 1626(2) | 44(1) |
| C(14) | 3141(8)  | 7585(3) | 979(2)  | 40(1) |
| C(15) | 3076(9)  | 8505(4) | 307(2)  | 54(1) |



|       |          |         |          |       |
|-------|----------|---------|----------|-------|
| C(16) | 4646(10) | 8248(4) | -321(2)  | 61(1) |
| C(17) | 6381(10) | 7052(4) | -285(2)  | 51(1) |
| C(18) | 6470(9)  | 6116(3) | 377(2)   | 48(1) |
| C(19) | 4874(8)  | 6386(3) | 993(2)   | 45(1) |
| C(20) | 8117(15) | 7642(5) | -1553(2) | 97(2) |

---

**Table S11** Bond lengths [Å] and angles [deg] for 220710e

---

|             |          |
|-------------|----------|
| S(1)-O(3)   | 1.409(3) |
| S(1)-O(4)   | 1.415(3) |
| S(1)-F(1)   | 1.562(2) |
| S(1)-C(3)   | 1.717(3) |
| N(1)-C(4)   | 1.391(4) |
| N(1)-C(1)   | 1.418(4) |
| N(1)-C(8)   | 1.422(4) |
| O(1)-C(13)  | 1.231(4) |
| O(2)-C(17)  | 1.370(5) |
| O(2)-C(20)  | 1.435(5) |
| C(1)-C(2)   | 1.374(5) |
| C(1)-C(13)  | 1.506(5) |
| C(2)-C(3)   | 1.415(5) |
| C(2)-H(2)   | 0.9300   |
| C(3)-C(4)   | 1.397(5) |
| C(4)-C(5)   | 1.419(5) |
| C(5)-C(6)   | 1.350(5) |
| C(5)-H(5)   | 0.9300   |
| C(6)-C(7)   | 1.439(5) |
| C(6)-H(6)   | 0.9300   |
| C(7)-C(8)   | 1.405(5) |
| C(7)-C(12)  | 1.409(5) |
| C(8)-C(9)   | 1.398(5) |
| C(9)-C(10)  | 1.384(5) |
| C(9)-H(9)   | 0.9300   |
| C(10)-C(11) | 1.394(6) |
| C(10)-H(10) | 0.9300   |

|                  |            |
|------------------|------------|
| C(11)-C(12)      | 1.375(6)   |
| C(11)-H(11)      | 0.9300     |
| C(12)-H(12)      | 0.9300     |
| C(13)-C(14)      | 1.473(5)   |
| C(14)-C(19)      | 1.396(5)   |
| C(14)-C(15)      | 1.403(5)   |
| C(15)-C(16)      | 1.383(5)   |
| C(15)-H(15)      | 0.9300     |
| C(16)-C(17)      | 1.390(6)   |
| C(16)-H(16)      | 0.9300     |
| C(17)-C(18)      | 1.399(5)   |
| C(18)-C(19)      | 1.372(5)   |
| C(18)-H(18)      | 0.9300     |
| C(19)-H(19)      | 0.9300     |
| C(20)-H(20A)     | 0.9600     |
| C(20)-H(20B)     | 0.9600     |
| C(20)-H(20C)     | 0.9600     |
| O(3)-S(1)-O(4)   | 121.11(18) |
| O(3)-S(1)-F(1)   | 104.13(18) |
| O(4)-S(1)-F(1)   | 104.44(17) |
| O(3)-S(1)-C(3)   | 111.28(18) |
| O(4)-S(1)-C(3)   | 110.74(17) |
| F(1)-S(1)-C(3)   | 103.04(16) |
| C(4)-N(1)-C(1)   | 109.1(3)   |
| C(4)-N(1)-C(8)   | 121.1(3)   |
| C(1)-N(1)-C(8)   | 129.4(3)   |
| C(17)-O(2)-C(20) | 117.6(3)   |
| C(2)-C(1)-N(1)   | 107.4(3)   |
| C(2)-C(1)-C(13)  | 124.1(3)   |

|                   |          |
|-------------------|----------|
| N(1)-C(1)-C(13)   | 124.4(3) |
| C(1)-C(2)-C(3)    | 108.1(3) |
| C(1)-C(2)-H(2)    | 125.9    |
| C(3)-C(2)-H(2)    | 125.9    |
| C(4)-C(3)-C(2)    | 108.6(3) |
| C(4)-C(3)-S(1)    | 127.1(3) |
| C(2)-C(3)-S(1)    | 124.3(3) |
| N(1)-C(4)-C(3)    | 106.8(3) |
| N(1)-C(4)-C(5)    | 120.0(3) |
| C(3)-C(4)-C(5)    | 133.2(3) |
| C(6)-C(5)-C(4)    | 119.4(3) |
| C(6)-C(5)-H(5)    | 120.3    |
| C(4)-C(5)-H(5)    | 120.3    |
| C(5)-C(6)-C(7)    | 121.5(3) |
| C(5)-C(6)-H(6)    | 119.3    |
| C(7)-C(6)-H(6)    | 119.3    |
| C(8)-C(7)-C(12)   | 118.4(4) |
| C(8)-C(7)-C(6)    | 119.8(3) |
| C(12)-C(7)-C(6)   | 121.7(4) |
| C(9)-C(8)-C(7)    | 120.2(3) |
| C(9)-C(8)-N(1)    | 122.4(3) |
| C(7)-C(8)-N(1)    | 117.4(3) |
| C(10)-C(9)-C(8)   | 119.7(4) |
| C(10)-C(9)-H(9)   | 120.1    |
| C(8)-C(9)-H(9)    | 120.1    |
| C(9)-C(10)-C(11)  | 120.7(4) |
| C(9)-C(10)-H(10)  | 119.6    |
| C(11)-C(10)-H(10) | 119.6    |
| C(12)-C(11)-C(10) | 119.5(4) |

|                     |          |
|---------------------|----------|
| C(12)-C(11)-H(11)   | 120.2    |
| C(10)-C(11)-H(11)   | 120.2    |
| C(11)-C(12)-C(7)    | 121.1(4) |
| C(11)-C(12)-H(12)   | 119.4    |
| C(7)-C(12)-H(12)    | 119.4    |
| O(1)-C(13)-C(14)    | 123.1(3) |
| O(1)-C(13)-C(1)     | 119.1(3) |
| C(14)-C(13)-C(1)    | 117.8(3) |
| C(19)-C(14)-C(15)   | 117.4(3) |
| C(19)-C(14)-C(13)   | 124.4(3) |
| C(15)-C(14)-C(13)   | 118.1(3) |
| C(16)-C(15)-C(14)   | 122.0(4) |
| C(16)-C(15)-H(15)   | 119.0    |
| C(14)-C(15)-H(15)   | 119.0    |
| C(15)-C(16)-C(17)   | 119.0(4) |
| C(15)-C(16)-H(16)   | 120.5    |
| C(17)-C(16)-H(16)   | 120.5    |
| O(2)-C(17)-C(16)    | 124.4(3) |
| O(2)-C(17)-C(18)    | 115.6(4) |
| C(16)-C(17)-C(18)   | 120.0(4) |
| C(19)-C(18)-C(17)   | 120.0(4) |
| C(19)-C(18)-H(18)   | 120.0    |
| C(17)-C(18)-H(18)   | 120.0    |
| C(18)-C(19)-C(14)   | 121.6(3) |
| C(18)-C(19)-H(19)   | 119.2    |
| C(14)-C(19)-H(19)   | 119.2    |
| O(2)-C(20)-H(20A)   | 109.5    |
| O(2)-C(20)-H(20B)   | 109.5    |
| H(20A)-C(20)-H(20B) | 109.5    |

|                     |       |
|---------------------|-------|
| O(2)-C(20)-H(20C)   | 109.5 |
| H(20A)-C(20)-H(20C) | 109.5 |
| H(20B)-C(20)-H(20C) | 109.5 |

---

Symmetry transformations used to generate equivalent atoms:

**Table S12** Anisotropic displacement parameters ( $\text{\AA}^2 \times 10^3$ ) for 220710e

The anisotropic displacement factor exponent takes the form:

$$-2 \pi^2 [ h^2 a^{*2} U_{11} + \dots + 2 h k a^* b^* U_{12} ]$$

|       | U11    | U22   | U33    | U23    | U13    | U12    |
|-------|--------|-------|--------|--------|--------|--------|
| S(1)  | 42(1)  | 46(1) | 52(1)  | -6(1)  | 3(1)   | -14(1) |
| F(1)  | 64(2)  | 44(1) | 117(2) | 8(1)   | -18(2) | -9(1)  |
| N(1)  | 37(2)  | 34(2) | 36(2)  | -5(1)  | 4(1)   | -2(1)  |
| O(1)  | 81(2)  | 40(2) | 53(2)  | -5(1)  | 7(2)   | 10(1)  |
| O(2)  | 114(3) | 55(2) | 43(2)  | -13(1) | 16(2)  | -7(2)  |
| O(3)  | 62(2)  | 82(2) | 69(2)  | -20(2) | 23(2)  | -35(2) |
| O(4)  | 69(2)  | 72(2) | 65(2)  | -19(2) | -4(2)  | -30(2) |
| C(1)  | 44(2)  | 39(2) | 37(2)  | -8(2)  | 3(2)   | -5(2)  |
| C(2)  | 44(2)  | 42(2) | 39(2)  | -11(2) | 0(2)   | -6(2)  |
| C(3)  | 38(2)  | 41(2) | 46(2)  | -6(2)  | 4(2)   | -10(2) |
| C(4)  | 35(2)  | 36(2) | 44(2)  | -5(2)  | 4(2)   | -3(2)  |
| C(5)  | 48(2)  | 51(2) | 39(2)  | -4(2)  | 9(2)   | -4(2)  |
| C(6)  | 50(2)  | 58(2) | 42(2)  | -14(2) | 5(2)   | 2(2)   |
| C(7)  | 44(2)  | 39(2) | 47(2)  | -15(2) | -2(2)  | 7(2)   |
| C(8)  | 37(2)  | 33(2) | 49(2)  | -12(2) | -3(2)  | 2(2)   |
| C(9)  | 46(2)  | 42(2) | 53(2)  | -9(2)  | -3(2)  | -2(2)  |
| C(10) | 55(3)  | 44(2) | 75(3)  | -5(2)  | -10(2) | -12(2) |
| C(11) | 69(3)  | 48(2) | 81(3)  | -22(2) | -19(3) | -5(2)  |
| C(12) | 58(3)  | 54(2) | 64(3)  | -28(2) | -8(2)  | 11(2)  |
| C(13) | 50(2)  | 36(2) | 43(2)  | -5(2)  | -3(2)  | -3(2)  |
| C(14) | 49(2)  | 37(2) | 35(2)  | -5(2)  | -5(2)  | -7(2)  |
| C(15) | 72(3)  | 40(2) | 45(2)  | -2(2)  | -6(2)  | 5(2)   |
| C(16) | 96(3)  | 47(2) | 34(2)  | 1(2)   | -6(2)  | 0(2)   |

|       |        |       |       |        |       |        |
|-------|--------|-------|-------|--------|-------|--------|
| C(17) | 74(3)  | 46(2) | 37(2) | -12(2) | 0(2)  | -14(2) |
| C(18) | 60(3)  | 37(2) | 44(2) | -6(2)  | 1(2)  | 0(2)   |
| C(19) | 57(2)  | 41(2) | 33(2) | -1(2)  | -3(2) | -9(2)  |
| C(20) | 174(6) | 68(3) | 40(3) | -11(2) | 26(3) | -16(3) |

---



**Table S13** Hydrogen coordinates (  $\times 10^4$ ) and isotropic displacement parameters ( $\text{\AA}^2 \times 10^3$ ) for 220710e.

|        | x     | y     | z     | U(eq) |
|--------|-------|-------|-------|-------|
| H(2)   | -189  | 5350  | 1953  | 50    |
| H(5)   | -2499 | 5521  | 4547  | 57    |
| H(6)   | -1089 | 7205  | 4977  | 61    |
| H(9)   | 4641  | 8884  | 2400  | 57    |
| H(10)  | 6440  | 10452 | 2886  | 70    |
| H(11)  | 4839  | 10666 | 4066  | 76    |
| H(12)  | 1900  | 9142  | 4804  | 69    |
| H(15)  | 1942  | 9312  | 284   | 65    |
| H(16)  | 4543  | 8867  | -762  | 73    |
| H(18)  | 7611  | 5311  | 400   | 58    |
| H(19)  | 4948  | 5756  | 1430  | 53    |
| H(20A) | 6174  | 7796  | -1719 | 145   |
| H(20B) | 9472  | 7299  | -1905 | 145   |
| H(20C) | 8734  | 8461  | -1495 | 145   |

**Table S14** Torsion angles [deg] for 220710e

---

|                      |           |
|----------------------|-----------|
| C(4)-N(1)-C(1)-C(2)  | -1.9(4)   |
| C(8)-N(1)-C(1)-C(2)  | 170.5(3)  |
| C(4)-N(1)-C(1)-C(13) | 156.1(3)  |
| C(8)-N(1)-C(1)-C(13) | -31.5(5)  |
| N(1)-C(1)-C(2)-C(3)  | 1.8(4)    |
| C(13)-C(1)-C(2)-C(3) | -156.3(3) |
| C(1)-C(2)-C(3)-C(4)  | -1.0(4)   |
| C(1)-C(2)-C(3)-S(1)  | 177.7(3)  |
| O(3)-S(1)-C(3)-C(4)  | 21.4(4)   |
| O(4)-S(1)-C(3)-C(4)  | 159.1(3)  |
| F(1)-S(1)-C(3)-C(4)  | -89.7(4)  |
| O(3)-S(1)-C(3)-C(2)  | -157.1(3) |
| O(4)-S(1)-C(3)-C(2)  | -19.3(4)  |
| F(1)-S(1)-C(3)-C(2)  | 91.9(3)   |
| C(1)-N(1)-C(4)-C(3)  | 1.3(4)    |
| C(8)-N(1)-C(4)-C(3)  | -171.9(3) |
| C(1)-N(1)-C(4)-C(5)  | -177.0(3) |
| C(8)-N(1)-C(4)-C(5)  | 9.8(5)    |
| C(2)-C(3)-C(4)-N(1)  | -0.2(4)   |
| S(1)-C(3)-C(4)-N(1)  | -178.9(3) |
| C(2)-C(3)-C(4)-C(5)  | 177.8(4)  |
| S(1)-C(3)-C(4)-C(5)  | -0.9(6)   |
| N(1)-C(4)-C(5)-C(6)  | -2.5(5)   |
| C(3)-C(4)-C(5)-C(6)  | 179.8(4)  |
| C(4)-C(5)-C(6)-C(7)  | -3.1(6)   |
| C(5)-C(6)-C(7)-C(8)  | 1.5(6)    |
| C(5)-C(6)-C(7)-C(12) | -174.6(4) |

|                         |           |
|-------------------------|-----------|
| C(12)-C(7)-C(8)-C(9)    | 3.5(5)    |
| C(6)-C(7)-C(8)-C(9)     | -172.8(3) |
| C(12)-C(7)-C(8)-N(1)    | -178.2(3) |
| C(6)-C(7)-C(8)-N(1)     | 5.5(5)    |
| C(4)-N(1)-C(8)-C(9)     | 167.1(3)  |
| C(1)-N(1)-C(8)-C(9)     | -4.6(5)   |
| C(4)-N(1)-C(8)-C(7)     | -11.2(5)  |
| C(1)-N(1)-C(8)-C(7)     | 177.2(3)  |
| C(7)-C(8)-C(9)-C(10)    | -3.7(5)   |
| N(1)-C(8)-C(9)-C(10)    | 178.1(3)  |
| C(8)-C(9)-C(10)-C(11)   | -0.2(6)   |
| C(9)-C(10)-C(11)-C(12)  | 4.2(6)    |
| C(10)-C(11)-C(12)-C(7)  | -4.4(6)   |
| C(8)-C(7)-C(12)-C(11)   | 0.5(6)    |
| C(6)-C(7)-C(12)-C(11)   | 176.7(4)  |
| C(2)-C(1)-C(13)-O(1)    | 124.7(4)  |
| N(1)-C(1)-C(13)-O(1)    | -29.7(5)  |
| C(2)-C(1)-C(13)-C(14)   | -53.6(5)  |
| N(1)-C(1)-C(13)-C(14)   | 152.0(3)  |
| O(1)-C(13)-C(14)-C(19)  | 166.3(4)  |
| C(1)-C(13)-C(14)-C(19)  | -15.5(5)  |
| O(1)-C(13)-C(14)-C(15)  | -10.0(6)  |
| C(1)-C(13)-C(14)-C(15)  | 168.3(3)  |
| C(19)-C(14)-C(15)-C(16) | 0.2(6)    |
| C(13)-C(14)-C(15)-C(16) | 176.7(4)  |
| C(14)-C(15)-C(16)-C(17) | -1.1(7)   |
| C(20)-O(2)-C(17)-C(16)  | 1.9(6)    |
| C(20)-O(2)-C(17)-C(18)  | -178.3(4) |
| C(15)-C(16)-C(17)-O(2)  | -178.8(4) |

|                         |           |
|-------------------------|-----------|
| C(15)-C(16)-C(17)-C(18) | 1.4(6)    |
| O(2)-C(17)-C(18)-C(19)  | 179.3(3)  |
| C(16)-C(17)-C(18)-C(19) | -0.8(6)   |
| C(17)-C(18)-C(19)-C(14) | -0.1(6)   |
| C(15)-C(14)-C(19)-C(18) | 0.4(6)    |
| C(13)-C(14)-C(19)-C(18) | -175.9(3) |

---

Symmetry transformations used to generate equivalent atoms:

**Table S15** Hydrogen bonds for 220710e [Å and deg.]

---

| D-H...A | d(D-H) | d(H...A) | d(D...A) | <(DHA) |
|---------|--------|----------|----------|--------|
|---------|--------|----------|----------|--------|

---
